# Supplementary material for: Horizontal metaproteomics and CAZymes analysis of lignocellulolytic microbial consortia selectively enriched from cow rumen and termite gut
Source: Springer Nature journal article supplement (doi:10.1038/s43705-023-00339-0), 2023-12-01
Supplement: MOESM2 [file 43705_2023_339_moesm2_esm.xlsx]

## Sheet: Metaproteomic
hit.list	CAZymes	common.COG.KOG	main.role..COG.KOG.	subrole..COG.KOG.	description..COG.KOG.	common.TIGRFAM	main.role..TIGRFAM.	sub.role..TIGRFAM.	description..TIGRFAM.	common.PFAM	superkingdom..common.	phylum..common.	class..common.	order..common.	family..common.	genus..common.	species..common.	RWS1.T1	RWS1.T2	RWS1.T3	RWS1.T4	RWS2.T1	RWS2.T2	RWS2.T3	RWS2.T4	TWS1.T1	TWS1.T2	TWS1.T3	TWS1.T4	TWS2.T1	TWS2.T2	TWS2.T3	TWS2.T4
A0A010RI78	NA	COG0443	cellular processes and signaling	O : Posttranslational modification	Molecular chaperone	TIGR02350	Protein fate	Protein folding and stabilization	chaperone protein DnaK	PF00012.16	Bacteria	Proteobacteria	Gammaproteobacteria	Pseudomonadales	Pseudomonadaceae	Pseudomonas	Pseudomonas fluorescens	6.7e-05	0	0	0	0.000154122	0	0	0	0	0	0	0	0	0	0	0
A0A010RWH1	NA	COG0538	metabolism	C : Energy production and conversion	Isocitrate dehydrogenases	TIGR00183	Energy metabolism	TCA cycle	isocitrate dehydrogenase, NADP-dependent	PF00180.16	Bacteria	Proteobacteria	Gammaproteobacteria	Pseudomonadales	Pseudomonadaceae	Pseudomonas	Pseudomonas fluorescens	0	0	0	0	0	0	0	0	0.000106735	0	0	0	0	0	0	0
A0A010YDM2	NA	COG1454	metabolism	C : Energy production and conversion	Alcohol dehydrogenase, class IV	no hit	-	-	-	PF00465.15	Bacteria	Synergistetes	Synergistia	Synergistales	Synergistaceae	Cloacibacillus	Cloacibacillus evryensis	0	0	0	0	0	0	0	0.000135905	0	0	0	0	0	0	0	0
A0A010ZJZ7	NA	COG1151	metabolism	C : Energy production and conversion	6Fe-6S prismane cluster-containing protein	TIGR01702	-	-	carbon-monoxide dehydrogenase, catalytic subunit	PF03063.16	Bacteria	Synergistetes	Synergistia	Synergistales	Synergistaceae	Cloacibacillus	Cloacibacillus evryensis	7.55e-05	0	0	0	0.000106869	8.55e-05	0	0	0	0	0	0	0	0	0	0
A0A011A8D2	NA	COG0674	metabolism	C : Energy production and conversion	Pyruvate:ferredoxin oxidoreductase and related 2-oxoacid:ferredoxin oxidoreductases, alpha subunit	TIGR02176	-	-	pyruvate:ferredoxin (flavodoxin) oxidoreductase	PF01855.15	Bacteria	Synergistetes	Synergistia	Synergistales	Synergistaceae	Cloacibacillus	Cloacibacillus evryensis	0	7.21e-05	0	0	0	0	0	0	0	6.19e-05	0	0	0	3.32e-05	0	0
A0A011M6P1	NA	COG4198	poorly characterized	S : Function unknown	Uncharacterized conserved protein	no hit	-	-	-	PF06245.7	Bacteria	Proteobacteria	Betaproteobacteria	Uncl.Betaproteobacteria	Uncl.Betaproteobacteria	Candidatus Accumulibacter	Candidatus Accumulibacter sp. SK-12	0	0	0	0	0	0	0	0	0	8.93e-05	0	0	0	0	0	0
A0A011PKF8	NA	COG0522	information storage and processing	J : Translation	Ribosomal protein S4 and related proteins	TIGR01017	Protein synthesis	Ribosomal proteins: synthesis and modification	ribosomal protein uS4	PF00163.15	Bacteria	Proteobacteria	Betaproteobacteria	Uncl.Betaproteobacteria	Uncl.Betaproteobacteria	Candidatus Accumulibacter	Candidatus Accumulibacter sp. SK-12	0	0	0	0	0	0	0	0	0	0	0	0	0.000214799	0	0	0
A0A011Q916	NA	COG0050	information storage and processing	J : Translation	GTPases - translation elongation factors	TIGR00485	Protein synthesis	Translation factors	translation elongation factor Tu	PF00009.23	Bacteria	Firmicutes	Bacilli	Lactobacillales	Carnobacteriaceae	Alkalibacterium	Alkalibacterium sp. AK22	0	0.000322358	0	0	0	0	0	0	0	0	0	0	0	0	0	0
A0A011U8Y2	NA	COG0031	metabolism	E : Amino acid	Cysteine synthase	TIGR01139	Amino acid biosynthesis	Serine family	cysteine synthase A	PF00291.21	Bacteria	Proteobacteria	Alphaproteobacteria	Rhizobiales	Phyllobacteriaceae	Aquamicrobium	Aquamicrobium defluvii	0	0	0.000254159	0.000203964	0	0	0	0	0	0	0	0	0	0	0	0
A0A014LV23	NA	COG0783	metabolism	P : Inorganic ion	DNA-binding ferritin-like protein (oxidative damage protectant)	no hit	-	-	-	PF00210.20	Bacteria	Proteobacteria	Gammaproteobacteria	Enterobacterales	Erwiniaceae	Erwinia	Erwinia mallotivora	0	0	0	0	0	0	0	0	0	0	0	0	0.000193235	0	0	0
A0A014MQD6	NA	COG1344	cellular processes and signaling	N : Cell motility	Flagellin and related hook-associated proteins	no hit	-	-	-	PF00669.16	Bacteria	Proteobacteria	Betaproteobacteria	Burkholderiales	Comamonadaceae	Comamonas	Comamonas aquatica	0	0	0	0	0	0	0	0	0	0	0	0.000157727	0	0	0	0
A0A014MR56	NA	COG3203	cellular processes and signaling	M : Cell wall	Outer membrane protein (porin)	no hit	-	-	-	PF13609.2	Bacteria	Proteobacteria	Betaproteobacteria	Burkholderiales	Comamonadaceae	Comamonas	Comamonas aquatica	0	0	0	0	0	0	0	0	0	0	0	0.00018753	0	0	0	0
A0A014N375	NA	COG0091	information storage and processing	J : Translation	Ribosomal protein L22	TIGR01044	Protein synthesis	Ribosomal proteins: synthesis and modification	ribosomal protein uL22	PF00237.15	Bacteria	Proteobacteria	Gammaproteobacteria	Enterobacterales	Erwiniaceae	Erwinia	Erwinia mallotivora	0.00155263	0.000948127	0	0	0.00150307	0.000811467	0	0	0.00177411	0	0	0	0.0017437	0	0	0
A0A014N5L6	NA	COG0059	metabolism	E : Amino acid	Ketol-acid reductoisomerase	TIGR00465	Amino acid biosynthesis	Pyruvate family	ketol-acid reductoisomerase	PF07991.8	Bacteria	Proteobacteria	Gammaproteobacteria	Enterobacterales	Erwiniaceae	Erwinia	Erwinia mallotivora	0	0	0	0	0	0	0	0	0	0	0	0	0.000116443	0	0	0
A0A014NJ83	NA	COG0256	information storage and processing	J : Translation	Ribosomal protein L18	TIGR00060	Protein synthesis	Ribosomal proteins: synthesis and modification	ribosomal protein uL18	PF00861.18	Bacteria	Proteobacteria	Gammaproteobacteria	Enterobacterales	Erwiniaceae	Erwinia	Erwinia mallotivora	0.000890855	0	0	0	0	0	0	0	0.00123696	0	0	0	0.00085735	0	0	0
A0A014NKM1	NA	COG0231	information storage and processing	J : Translation	Translation elongation factor P (EF-P)/translation initiation factor 5A (eIF-5A)	TIGR00038	Protein synthesis	Translation factors	translation elongation factor P	PF09285.7	Bacteria	Proteobacteria	Gammaproteobacteria	Enterobacterales	Erwiniaceae	Erwinia	Erwinia mallotivora	0.000251819	0.000224493	0.000265816	0.000287229	0.000523032	0	0	0.000292051	0.000365649	0.000210358	0.000215195	0	0.00017165	0	0	0
A0A014NS62	NA	COG0250	information storage and processing	K : Transcription	Transcription antiterminator	TIGR00922	Transcription	Transcription factors	transcription termination/antitermination factor NusG	PF02357.15	Bacteria	Proteobacteria	Gammaproteobacteria	Enterobacterales	Erwiniaceae	Erwinia	Erwinia mallotivora	0.000261558	0	0	0	0	0	0	0	0.000385237	0	0	0	0.000369469	0	0	0
A0A014PRJ7	NA	COG0823	cellular processes and signaling	U : Intracellular trafficking	Periplasmic component of the Tol biopolymer transport system	TIGR02800	Transport and binding proteins	Other	Tol-Pal system beta propeller repeat protein TolB	PF07676.8	Bacteria	Proteobacteria	Gammaproteobacteria	Enterobacterales	Erwiniaceae	Erwinia	Erwinia mallotivora	0	0	0	0	0	0	0	0	0	0	0	0	8.1e-05	0	0	0
A0A014PSL0	NA	COG0186	information storage and processing	J : Translation	Ribosomal protein S17	TIGR03635	Protein synthesis	Ribosomal proteins: synthesis and modification	ribosomal protein uS17	PF00366.16	Bacteria	Proteobacteria	Gammaproteobacteria	Enterobacterales	Erwiniaceae	Erwinia	Erwinia mallotivora	0	0	0	0	0	0	0	0	0	0	0	0	0.00057764	0	0	0
A0A014PVJ1	NA	COG0481	cellular processes and signaling	M : Cell wall	Membrane GTPase LepA	TIGR01393	Unknown function	General	elongation factor 4	PF00009.23	Bacteria	Proteobacteria	Gammaproteobacteria	Enterobacterales	Erwiniaceae	Erwinia	Erwinia mallotivora	0	0	0	0	0	0	0	0	7.45e-05	0	0	0	0	0	0	0
A0A017HCL6	NA	COG4166	metabolism	E : Amino acid	ABC-type oligopeptide transport system, periplasmic component	no hit	-	-	-	PF00496.18	Bacteria	Proteobacteria	Alphaproteobacteria	Rhodobacterales	Rhodobacteraceae	Loktanella	Loktanella hongkongensis	0	0	0	0	0	0	0	0	0	0	7.98e-05	0	0	0	0	0
A0A017HSU4	NA	COG0093	information storage and processing	J : Translation	Ribosomal protein L14	TIGR01067	Protein synthesis	Ribosomal proteins: synthesis and modification	ribosomal protein uL14	PF00238.15	Bacteria	Proteobacteria	Alphaproteobacteria	Rhodobacterales	Rhodobacteraceae	Rubellimicrobium	Rubellimicrobium mesophilum	0.000505135	0.000461866	0.000409618	0.000442616	0.00135522	0.000438534	0.000576635	0	0	0.000324158	0.000346865	0.000381359	0.00026451	0.000318486	0.000409423	0.000402082
A0A017HT92	NA	COG0234	cellular processes and signaling	O : Posttranslational modification	Co-chaperonin GroES (HSP10)	no hit	-	-	-	PF00166.17	Bacteria	Proteobacteria	Alphaproteobacteria	Rhodobacterales	Rhodobacteraceae	Rubellimicrobium	Rubellimicrobium mesophilum	0	0	0	0	0.000787319	0.000509535	0	0	0	0	0	0	0	0	0	0
A0A017RY09	NA	COG0282	metabolism	C : Energy production and conversion	Acetate kinase	TIGR00016	Energy metabolism	Fermentation	acetate kinase	PF00871.13	Bacteria	Firmicutes	Clostridia	Clostridiales	Clostridiaceae	Fervidicella	Fervidicella metallireducens	0	0	0	0	0	0	0	0	0	0	0	0	8.56e-05	0	0	0
A0A021VPM1	NA	COG0459	cellular processes and signaling	O : Posttranslational modification	Chaperonin GroEL (HSP60 family)	TIGR02348	Protein fate	Protein folding and stabilization	chaperonin GroL	PF00118.20	Bacteria	Actinobacteria	Actinobacteria	Micrococcales	Cellulomonadaceae	Actinotalea	Actinotalea ferrariae	7.86e-05	0	0	0	0	0	0	0	0	0	0	0	0	0	0	0
A0A021VVS1	NA	COG1053	metabolism	C : Energy production and conversion	Succinate dehydrogenase/fumarate reductase, flavoprotein subunit	TIGR01811	Energy metabolism	TCA cycle	succinate dehydrogenase or fumarate reductase, flavoprotein subunit	PF00890.20	Bacteria	Actinobacteria	Actinobacteria	Micrococcales	Cellulomonadaceae	Actinotalea	Actinotalea ferrariae	0	0	0	0.000110458	0	0	9.65e-05	0.000125705	0	0	0	7.17e-05	0	0	0	0
A0A021X138	NA	COG4181	metabolism	Q : Secondary metabolites	Predicted ABC-type transport system involved in lysophospholipase L1 biosynthesis, ATPase component	no hit	-	-	-	PF00005.23	Bacteria	Proteobacteria	Alphaproteobacteria	Rhizobiales	Rhizobiaceae	Shinella	Shinella sp. DD12	0	0	0	0	0	0	0.000263886	0	0	0	0	0	0	0	0	0
A0A021X173	NA	COG1012	metabolism	C : Energy production and conversion	NAD-dependent aldehyde dehydrogenases	no hit	-	-	-	PF00171.18	Bacteria	Proteobacteria	Alphaproteobacteria	Rhizobiales	Rhizobiaceae	Shinella	Shinella sp. DD12	0	0	0	0	0	0.000212875	0	0.000118747	0	0	0	0	0	0	0	0
A0A021XDD6	NA	COG1879	metabolism	G : Carbohydrate	ABC-type sugar transport system, periplasmic component	no hit	-	-	-	PF13407.2	Bacteria	Proteobacteria	Alphaproteobacteria	Rhizobiales	Rhizobiaceae	Shinella	Shinella sp. DD12	0	0	0	0	0	0	0	0	0	0	0	0	0	0.000233185	0	0
A0A022LV16	NA	COG0683	metabolism	E : Amino acid	ABC-type branched-chain amino acid transport systems, periplasmic component	no hit	-	-	-	PF13458.2	Bacteria	Actinobacteria	Actinobacteria	Micrococcales	Microbacteriaceae	Curtobacterium	Curtobacterium flaccumfaciens	0.000289007	0	0.000109856	0	0	0	0	0	0	0	0	0	0	0	0	0
A0A023BRP2	NA	COG0198	information storage and processing	J : Translation	Ribosomal protein L24	TIGR01079	Protein synthesis	Ribosomal proteins: synthesis and modification	ribosomal protein uL24	PF00467.25	Bacteria	Bacteroidetes	Flavobacteriia	Flavobacteriales	Flavobacteriaceae	Aquimarina	Aquimarina atlantica	0.000874068	0.000819508	0.000710855	0	0.000650554	0	0	0	0	0.000383954	0	0	0	0.000377236	0	0
A0A023BSW8	NA	COG0050	information storage and processing	J : Translation	GTPases - translation elongation factors	TIGR00485	Protein synthesis	Translation factors	translation elongation factor Tu	PF00009.23	Bacteria	Bacteroidetes	Flavobacteriia	Flavobacteriales	Flavobacteriaceae	Aquimarina	Aquimarina atlantica	0	0	0	0	0	0	0	0	0	0	0	0.00012434	8.88e-05	0.000135787	0	0.000124188
A0A023D2C4	NA	COG2025	metabolism	C : Energy production and conversion	Electron transfer flavoprotein, alpha subunit	no hit	-	-	-	PF00766.15	Bacteria	Proteobacteria	Alphaproteobacteria	Rhodospirillales	Acetobacteraceae	Acidomonas	Acidomonas methanolica	0	0	0	0	0	0	0	0	0	0	0	0.000157923	0	0	0.000173284	0
A0A023X560	NA	COG0098	information storage and processing	J : Translation	Ribosomal protein S5	TIGR01021	Protein synthesis	Ribosomal proteins: synthesis and modification	ribosomal protein uS5	PF03719.11	Bacteria	Actinobacteria	Rubrobacteria	Rubrobacterales	Rubrobacteraceae	Rubrobacter	Rubrobacter radiotolerans	0	0	0.000226899	0	0	0	0	0	0	0	0	0	0	0	0	0
A0A023X5F9	NA	COG0050	information storage and processing	J : Translation	GTPases - translation elongation factors	TIGR00485	Protein synthesis	Translation factors	translation elongation factor Tu	PF00009.23	Bacteria	Actinobacteria	Rubrobacteria	Rubrobacterales	Rubrobacteraceae	Rubrobacter	Rubrobacter radiotolerans	0.000236709	0.000157627	0.000124933	0.000134998	0	0	0	0	0	0	0	0	0	0	0	0
A0A024HFA1	NA	COG2885	cellular processes and signaling	M : Cell wall	Outer membrane protein and related peptidoglycan-associated (lipo)proteins	no hit	-	-	-	PF05736.7	Bacteria	Proteobacteria	Gammaproteobacteria	Pseudomonadales	Pseudomonadaceae	Pseudomonas	Pseudomonas knackmussii	0	0	0	0	0	0	0	0	0	0	0	0	0	0	0	0.000133205
A0A024HLP6	NA	COG0031	metabolism	E : Amino acid	Cysteine synthase	TIGR01139	Amino acid biosynthesis	Serine family	cysteine synthase A	PF00291.21	Bacteria	Proteobacteria	Gammaproteobacteria	Pseudomonadales	Pseudomonadaceae	Pseudomonas	Pseudomonas knackmussii	0	0	0	0	0	0	0	0	0	0.000169048	0	0.000143598	0	0	0.000127439	0.000199076
A0A024P128	NA	no hit	-	S : Function unknown	-	TIGR02836	Cellular processes	Sporulation and germination	stage IV sporulation protein A	PF09547.6	Bacteria	Firmicutes	Bacilli	Bacillales	Bacillaceae	Halobacillus	Halobacillus karajensis	0	0	0	0	0	0	0	0	0	7.9e-05	0	9.76e-05	0	0	0.000107164	0
A0A024P9J4	NA	COG0166	metabolism	G : Carbohydrate	Glucose-6-phosphate isomerase	no hit	-	-	-	PF00342.15	Bacteria	Firmicutes	Bacilli	Bacillales	Bacillaceae	Halobacillus	Halobacillus karajensis	0	0	0	0	0	0	0	0	0	8.8e-05	9.01e-05	0.000109386	0	0	0.00011126	0.000104725
A0A031LGG9	NA	COG0103	information storage and processing	J : Translation	Ribosomal protein S9	no hit	-	-	-	PF00380.15	Bacteria	Proteobacteria	Gammaproteobacteria	Pseudomonadales	Moraxellaceae	Acinetobacter	Acinetobacter sp. Ver3	0	0	0	0	0.000645848	0	0	0	0	0	0	0	0	0	0	0
A0A031LL29	NA	COG0479	metabolism	C : Energy production and conversion	Succinate dehydrogenase/fumarate reductase, Fe-S protein subunit	TIGR00384	Energy metabolism	Aerobic	succinate dehydrogenase and fumarate reductase iron-sulfur protein	PF13085.2	Bacteria	Proteobacteria	Gammaproteobacteria	Pseudomonadales	Moraxellaceae	Acinetobacter	Acinetobacter sp. Ver3	0	0.000178358	0	0	0	0	0	0.000248234	0	0	0	0	0	0	0	0
A0A031LMF6	NA	COG1752	poorly characterized	R : General function prediction only	Predicted esterase of the alpha-beta hydrolase superfamily	no hit	-	-	-	PF01734.18	Bacteria	Proteobacteria	Gammaproteobacteria	Pseudomonadales	Moraxellaceae	Acinetobacter	Acinetobacter sp. Ver3	0.000237704	0.000267619	0.000157675	0.000169276	0.000308244	0.000167498	0	0.000180878	0	0	0	0	0	0	0	0
A0A031LNP5	NA	COG0359	information storage and processing	J : Translation	Ribosomal protein L9	TIGR00158	Protein synthesis	Ribosomal proteins: synthesis and modification	ribosomal protein bL9	PF03948.10	Bacteria	Proteobacteria	Gammaproteobacteria	Pseudomonadales	Moraxellaceae	Acinetobacter	Acinetobacter sp. Ver3	0	0	0	0	0.000664392	0	0	0	0	0	0	0	0	0	0	0
A0A031LT63	NA	COG0081	information storage and processing	J : Translation	Ribosomal protein L1	TIGR01169	Protein synthesis	Ribosomal proteins: synthesis and modification	ribosomal protein uL1	PF00687.17	Bacteria	Proteobacteria	Gammaproteobacteria	Pseudomonadales	Moraxellaceae	Acinetobacter	Acinetobacter sp. Ver3	0	0	0	0	0.000357873	0	0	0.000253607	0	0	0	0	0	0	0	0
A0A031LTX9	NA	COG0080	information storage and processing	J : Translation	Ribosomal protein L11	TIGR01632	Protein synthesis	Ribosomal proteins: synthesis and modification	ribosomal protein uL11	PF03946.10	Bacteria	Proteobacteria	Gammaproteobacteria	Pseudomonadales	Moraxellaceae	Acinetobacter	Acinetobacter sp. Ver3	0	0	0	0	0.000582173	0.000376768	0	0.000419797	0	0	0	0	0	0	0	0
A0A031LVN2	NA	COG0256	information storage and processing	J : Translation	Ribosomal protein L18	TIGR00060	Protein synthesis	Ribosomal proteins: synthesis and modification	ribosomal protein uL18	PF00861.18	Bacteria	Proteobacteria	Gammaproteobacteria	Pseudomonadales	Moraxellaceae	Acinetobacter	Acinetobacter sp. Ver3	0	0	0	0	0.000847676	0.000461043	0	0.000513889	0	0	0	0	0	0	0	0
A0A033UX85	NA	COG0057	metabolism	G : Carbohydrate	Glyceraldehyde-3-phosphate dehydrogenase/erythrose-4-phosphate dehydrogenase	TIGR01534	Energy metabolism	Glycolysis/gluconeogenesis	glyceraldehyde-3-phosphate dehydrogenase, type I	PF02800.16	Bacteria	Firmicutes	Bacilli	Bacillales	Staphylococcaceae	Staphylococcus	Staphylococcus aureus	0.000239283	0.000251727	0.000245072	0.000160712	0.000199426	0.000159169	0	0.00016341	0.000132788	0.0001177	0.000125945	0.000141215	0	0	0	0.000145994
A0A033UZY9	NA	COG0148	metabolism	G : Carbohydrate	Enolase	TIGR01060	Energy metabolism	Glycolysis/gluconeogenesis	phosphopyruvate hydratase	PF00113.18	Bacteria	Firmicutes	Bacilli	Bacillales	Staphylococcaceae	Staphylococcus	Staphylococcus aureus	0.000114257	9.64e-05	0.000117663	0	0	0	0	0	0	0	0	0	0	0	0	0
A0A037YY11	NA	COG0183	metabolism	I : Lipid	Acetyl-CoA acetyltransferase	TIGR01930	Fatty acid and phospholipid metabolism	Other	acetyl-CoA C-acyltransferase	PF00108.19	Bacteria	Firmicutes	Clostridia	Clostridiales	Clostridiaceae	Clostridium	Clostridium tetanomorphum	0	0	0	0	0	0	0	0	0	0	0	0	0.000114121	0	0	0
A0A037Z2F0	NA	COG0347	metabolism	E : Amino acid	Nitrogen regulatory protein PII	no hit	-	-	-	PF00543.18	Bacteria	Firmicutes	Clostridia	Clostridiales	Clostridiaceae	Clostridium	Clostridium tetanomorphum	0	0	0	0	0	0	0	0	0	0.000414133	0	0	0	0.000390729	0	0
A0A037Z338	NA	COG1788	metabolism	I : Lipid	Acyl CoA:acetate/3-ketoacid CoA transferase, alpha subunit	TIGR02429	-	-	3-oxoacid CoA-transferase, A subunit	PF01144.19	Bacteria	Firmicutes	Clostridia	Clostridiales	Clostridiaceae	Clostridium	Clostridium tetanomorphum	0	0	0	0	0	0	0	0	0	0	0	0	0.000195814	0	0	0
A0A037Z6V3	NA	COG0091	information storage and processing	J : Translation	Ribosomal protein L22	TIGR01044	Protein synthesis	Ribosomal proteins: synthesis and modification	ribosomal protein uL22	PF00237.15	Bacteria	Firmicutes	Clostridia	Clostridiales	Clostridiaceae	Clostridium	Clostridium tetanomorphum	0	0	0	0	0	0	0	0	0	0	0	0	0.000306835	0	0	0
A0A037Z775	NA	COG1344	cellular processes and signaling	N : Cell motility	Flagellin and related hook-associated proteins	no hit	-	-	-	PF00669.16	Bacteria	Firmicutes	Clostridia	Clostridiales	Clostridiaceae	Clostridium	Clostridium tetanomorphum	0	0.000153623	0.000186371	0.000242672	0	0	0	0	0	0	0	0	0	0	0	0
A0A037Z7G7	NA	COG0282	metabolism	C : Energy production and conversion	Acetate kinase	TIGR00016	Energy metabolism	Fermentation	acetate kinase	PF00871.13	Bacteria	Firmicutes	Clostridia	Clostridiales	Clostridiaceae	Clostridium	Clostridium tetanomorphum	0	0	0	0	0	0	0	0	9.12e-05	0	0	0	0.000144292	0	0	0
A0A037Z7L6	NA	COG1185	information storage and processing	J : Translation	Polyribonucleotide nucleotidyltransferase (polynucleotide phosphorylase)	TIGR03591	Transcription	Degradation of RNA	polyribonucleotide nucleotidyltransferase	PF01138.17	Bacteria	Firmicutes	Clostridia	Clostridiales	Clostridiaceae	Clostridium	Clostridium tetanomorphum	0	0	0	0	0	0	0	0	0	0	0	0	4.84e-05	0	0	0
A0A037Z7U5	NA	COG0050	information storage and processing	J : Translation	GTPases - translation elongation factors	TIGR00485	Protein synthesis	Translation factors	translation elongation factor Tu	PF00009.23	Bacteria	Firmicutes	Clostridia	Clostridiales	Clostridiaceae	Clostridium	Clostridium tetanomorphum	0	0	0	0	0	0	0	0	9.12e-05	0	0.000106593	0	0	0	0	0
A0A037Z8V0	NA	COG2368	metabolism	Q : Secondary metabolites	Aromatic ring hydroxylase	no hit	-	-	-	PF11794.4	Bacteria	Firmicutes	Clostridia	Clostridiales	Clostridiaceae	Clostridium	Clostridium tetanomorphum	0	0	0	0	0	0	0	0	0	0	0	0	0.000115052	0	0	0
A0A037ZB73	NA	COG0206	cellular processes and signaling	D : Cell cycle control	Cell division GTPase	TIGR00065	Cellular processes	Cell division	cell division protein FtsZ	PF00091.21	Bacteria	Firmicutes	Clostridia	Clostridiales	Clostridiaceae	Clostridium	Clostridium tetanomorphum	0	0	0	0	0	0	0	0	0	0	0	0	9.01e-05	0	0	0
A0A037ZBP4	NA	COG2115	metabolism	G : Carbohydrate	Xylose isomerase	TIGR02630	Energy metabolism	Sugars	xylose isomerase	PF01261.20	Bacteria	Firmicutes	Clostridia	Clostridiales	Clostridiaceae	Clostridium	Clostridium tetanomorphum	0	0	0	0	0	0	0	0	8.22e-05	0.000236072	0.000319731	0.000360854	0	0.000122935	0.000248487	0.000294217
A0A037ZCZ4	NA	COG0493	metabolism	E : Amino acid	NADPH-dependent glutamate synthase beta chain and related oxidoreductases	no hit	-	-	-	PF07992.10	Bacteria	Firmicutes	Clostridia	Clostridiales	Clostridiaceae	Clostridium	Clostridium tetanomorphum	0	0	0	0	0	0	0	9.51e-05	0	0	0	0	0	0	5.56e-05	0
A0A037ZD87	NA	COG0674	metabolism	C : Energy production and conversion	Pyruvate:ferredoxin oxidoreductase and related 2-oxoacid:ferredoxin oxidoreductases, alpha subunit	TIGR02176	-	-	pyruvate:ferredoxin (flavodoxin) oxidoreductase	PF01855.15	Bacteria	Firmicutes	Clostridia	Clostridiales	Clostridiaceae	Clostridium	Clostridium tetanomorphum	0	0	0	0	7.06e-05	0	0	0	0	0	0	0	0	0	0	0
A0A037ZKC3	NA	COG4670	metabolism	I : Lipid	Acyl CoA:acetate/3-ketoacid CoA transferase	no hit	-	-	-	PF01144.19	Bacteria	Proteobacteria	Alphaproteobacteria	Rhodobacterales	Rhodobacteraceae	Actibacterium	Actibacterium mucosum	0	0	0	0	0	0	0	0	0	0	0	7.24e-05	0	0	0	0
A0A059IL59	NA	COG1544	information storage and processing	J : Translation	Ribosome-associated protein Y (PSrp-1)	TIGR00741	Protein synthesis	Translation factors	ribosomal subunit interface protein	PF02482.15	Bacteria	Proteobacteria	Alphaproteobacteria	Rhodobacterales	Rhodobacteraceae	Defluviimonas	Defluviimonas sp. 20V17	0	0	0	0	0.000514817	0.000279747	0	0	0	0	0	0	0	0	0	0
A0A059IRZ6	NA	COG0100	information storage and processing	J : Translation	Ribosomal protein S11	TIGR03632	Protein synthesis	Ribosomal proteins: synthesis and modification	ribosomal protein uS11	PF00411.15	Bacteria	Proteobacteria	Alphaproteobacteria	Rhodobacterales	Rhodobacteraceae	Defluviimonas	Defluviimonas sp. 20V17	0	0	0	0	0.000762249	0	0	0	0	0	0	0	0	0	0	0
A0A059KJY6	NA	COG0835	cellular processes and signaling	N : Cell motility	Chemotaxis signal transduction protein	no hit	-	-	-	PF01584.15	Bacteria	Proteobacteria	Betaproteobacteria	Burkholderiales	Uncl.Burkholderiales	Sphaerotilus	Sphaerotilus natans	0	0	0	0	0	0	0	0	0	0	0	0	0.000186291	0.000192058	0	0
A0A060LWM9	NA	COG1136	cellular processes and signaling	V : Defense mechanisms	ABC-type antimicrobial peptide transport system, ATPase component	no hit	-	-	-	PF00005.23	Bacteria	Firmicutes	Bacilli	Bacillales	Bacillaceae	Bacillus	Bacillus lehensis	0	0	0	0	0	0	0	0	0	0	0	0	0	0	0.000163202	0
A0A060LXV9	NA	COG0133	metabolism	E : Amino acid	Tryptophan synthase beta chain	TIGR00263	Amino acid biosynthesis	Aromatic amino acid family	tryptophan synthase, beta subunit	PF00291.21	Bacteria	Firmicutes	Bacilli	Bacillales	Bacillaceae	Bacillus	Bacillus lehensis	0	0.000104591	0	0	0	0	0	0	0.000199811	0.000165136	0.000166582	0	0.000138915	0	0.000103225	0
A0A060QG23	NA	COG0050	information storage and processing	J : Translation	GTPases - translation elongation factors	TIGR00485	Protein synthesis	Translation factors	translation elongation factor Tu	PF00009.23	Bacteria	Proteobacteria	Alphaproteobacteria	Rhodospirillales	Acetobacteraceae	Asaia	Asaia platycodi	0	0	0	0	0.00016921	0	0	0	0	0	0	0	0	0	0	0
A0A060R5Y6	NA	COG0015	metabolism	F : Nucleotide	Adenylosuccinate lyase	TIGR00928	Purines, pyrimidines, nucleosides, and nucleotides	Purine ribonucleotide biosynthesis	adenylosuccinate lyase	PF00206.16	Bacteria	Bacteroidetes	Bacteroidia	Bacteroidales	Rikenellaceae	Mucinivorans	Mucinivorans hirudinis	0	9.36e-05	0	0.000147433	0	0	0.000139258	0.000127938	0	0	0	0	0	0	0	0
A0A060R735	NA	COG0267	information storage and processing	J : Translation	Ribosomal protein L33	TIGR01023	Protein synthesis	Ribosomal proteins: synthesis and modification	ribosomal protein bL33	PF00471.16	Bacteria	Bacteroidetes	Bacteroidia	Bacteroidales	Rikenellaceae	Mucinivorans	Mucinivorans hirudinis	0	0	0	0.000870955	0	0.00172874	0	0	0	0.000998638	0	0	0	0.000865249	0	0
A0A060R7W3	NA	COG0244	information storage and processing	J : Translation	Ribosomal protein L10	no hit	-	-	-	PF00466.16	Bacteria	Bacteroidetes	Bacteroidia	Bacteroidales	Rikenellaceae	Mucinivorans	Mucinivorans hirudinis	0.000349677	0.000401486	0.000411652	0.000476883	0	0	0	0	0	0	0	0	0	0	0	0
A0A060RCQ8	NA	COG0017	information storage and processing	J : Translation	Aspartyl/asparaginyl-tRNA synthetases	TIGR00457	Protein synthesis	tRNA aminoacylation	asparagine--tRNA ligase	PF00152.16	Bacteria	Bacteroidetes	Bacteroidia	Bacteroidales	Rikenellaceae	Mucinivorans	Mucinivorans hirudinis	0	9.15e-05	0	0	0	0	0	0	0	8.06e-05	8.77e-05	0	7.56e-05	0.000116375	8.96e-05	0.00016109
A0A060RD80	NA	COG0057	metabolism	G : Carbohydrate	Glyceraldehyde-3-phosphate dehydrogenase/erythrose-4-phosphate dehydrogenase	TIGR01534	Energy metabolism	Glycolysis/gluconeogenesis	glyceraldehyde-3-phosphate dehydrogenase, type I	PF02800.16	Bacteria	Bacteroidetes	Bacteroidia	Bacteroidales	Rikenellaceae	Mucinivorans	Mucinivorans hirudinis	0	0	0	0	0	0	0	0	0.00013359	0.000124896	0.000126699	0.000142061	0.000104307	0.000120056	0.000161352	0.000146868
A0A060UMC3	NA	COG0443	cellular processes and signaling	O : Posttranslational modification	Molecular chaperone	TIGR02350	Protein fate	Protein folding and stabilization	chaperone protein DnaK	PF00012.16	Bacteria	Proteobacteria	Acidithiobacillia	Acidithiobacillales	Acidithiobacillaceae	Acidithiobacillus	Acidithiobacillus ferrivorans	0	0	7.93e-05	0	0	8.43e-05	0	0	7.5e-05	0	0	0	0	0	0	0
A0A061LTG7	NA	COG0050	information storage and processing	J : Translation	GTPases - translation elongation factors	TIGR00485	Protein synthesis	Translation factors	translation elongation factor Tu	PF00009.23	Bacteria	Actinobacteria	Actinobacteria	Micrococcales	Microbacteriaceae	Leucobacter	Leucobacter sp. UCD-THU	0.0002686	0	0	0	0	0	0	0	0.000197187	0	0.000217259	0.000185345	8.58e-05	0	0.000193852	0.000125264
A0A061P1F4	NA	COG1960	metabolism	I : Lipid	Acyl-CoA dehydrogenases	no hit	-	-	-	PF00441.20	Bacteria	Firmicutes	Bacilli	Bacillales	Uncl.Bacillales	Uncl.Bacillales	Geomicrobium sp. JCM 19038	0	0	0	0	0.000165859	0	0	0	0	0	0	0	0	0	0	0
A0A061Q9H3	NA	no hit	-	S : Function unknown	-	no hit	-	-	-	no hit	Bacteria	Proteobacteria	Alphaproteobacteria	Uncl.Alphaproteobacteria	Uncl.Alphaproteobacteria	Uncl.Alphaproteobacteria	alpha proteobacterium Q-1	0	0	0	0	0	0	0	0.000171798	0	0	0	0	0	0	0	0
A0A061SUN0	NA	COG0459	cellular processes and signaling	O : Posttranslational modification	Chaperonin GroEL (HSP60 family)	TIGR02348	Protein fate	Protein folding and stabilization	chaperonin GroL	PF00118.20	Bacteria	Proteobacteria	Alphaproteobacteria	Rhodobacterales	Rhodobacteraceae	Sulfitobacter	Sulfitobacter mediterraneus	0	0	0	0	0.000150307	0.000291692	0.000134208	0.000214276	0	0	0	0	0	0	0	0
A0A063BG96	NA	COG0081	information storage and processing	J : Translation	Ribosomal protein L1	TIGR01169	Protein synthesis	Ribosomal proteins: synthesis and modification	ribosomal protein uL1	PF00687.17	Bacteria	Proteobacteria	Betaproteobacteria	Burkholderiales	Burkholderiaceae	Burkholderia	Burkholderia sp. lig30	0	0	0	0	0	0	0	0	0	0	0	0	0.000139095	0	0	0
A0A066UEJ2	NA	COG1923	poorly characterized	R : General function prediction only	Uncharacterized host factor I protein	TIGR02383	Regulatory functions	Other	RNA chaperone Hfq	no hit	Bacteria	Proteobacteria	Gammaproteobacteria	Pseudomonadales	Moraxellaceae	Moraxella	Moraxella bovoculi	0	0	0	0	0	0	0	0	0.00016446	0	0	0	0	0	0	0
A0A066WP79	NA	COG1579	poorly characterized	R : General function prediction only	Zn-ribbon protein, possibly nucleic acid-binding	no hit	-	-	-	no hit	Bacteria	Bacteroidetes	Flavobacteriia	Flavobacteriales	Flavobacteriaceae	Flavobacterium	Flavobacterium seoulense	0	0	0	0	0.000258714	0	0	0	0	0	0	0	0	0	0	0
A0A066WT59	NA	no hit	-	S : Function unknown	-	no hit	-	-	-	no hit	Bacteria	Bacteroidetes	Flavobacteriia	Flavobacteriales	Flavobacteriaceae	Flavobacterium	Flavobacterium seoulense	0	0.000105381	0.000125878	0.000136018	0	0	0	0	0	0	0	0	0	0	0	0
A0A066WV38	NA	COG0137	metabolism	E : Amino acid	Argininosuccinate synthase	no hit	-	-	-	PF00764.15	Bacteria	Bacteroidetes	Flavobacteriia	Flavobacteriales	Flavobacteriaceae	Flavobacterium	Flavobacterium seoulense	0	0	0	0	0	0	0.000158199	0	0	0	0	0	0	0	0	0
A0A067A0B3	NA	COG0085	information storage and processing	K : Transcription	DNA-directed RNA polymerase, beta subunit/140 kD subunit	TIGR02013	Transcription	DNA-dependent RNA polymerase	DNA-directed RNA polymerase, beta subunit	PF00562.24	Bacteria	Proteobacteria	Gammaproteobacteria	Thiotrichales	Piscirickettsiaceae	Hydrogenovibrio	Hydrogenovibrio marinus	3.16e-05	0	0	0	0	0	0	0	0	0	0	0	0	0	0	0
A0A068JPJ7	NA	KOG0356	cellular processes and signaling	O : Posttranslational modification	Mitochondrial chaperonin, Cpn60/Hsp60p	TIGR02348	Protein fate	Protein folding and stabilization	chaperonin GroL	PF00118.20	Bacteria	Proteobacteria	Deltaproteobacteria	Desulfovibrionales	Desulfonatronaceae	Desulfonatronum	Desulfonatronum thiodismutans	0	0	0	0	0	0	0	0	0	0.0001	0	0	0	6.55e-05	0	0
A0A068JPK1	NA	KOG3256	metabolism	C : Energy production and conversion	NADH:ubiquinone oxidoreductase, NDUFS8/23 kDa subunit	TIGR02176	-	-	pyruvate:ferredoxin (flavodoxin) oxidoreductase	PF01855.15	Bacteria	Proteobacteria	Deltaproteobacteria	Desulfovibrionales	Desulfonatronaceae	Desulfonatronum	Desulfonatronum thiodismutans	0	3.54e-05	4.23e-05	0	8.15e-05	0	7.58e-05	0	0	0	0	0	0	0	3.42e-05	0
A0A068NZ12	NA	COG0050	information storage and processing	J : Translation	GTPases - translation elongation factors	TIGR00485	Protein synthesis	Translation factors	translation elongation factor Tu	PF00009.23	Bacteria	Armatimonadetes	Fimbriimonadia	Fimbriimonadales	Fimbriimonadaceae	Fimbriimonas	Fimbriimonas ginsengisoli	0.000234947	0.000104726	0.000124003	0.000208267	0.00032713	0.000265515	0.000311688	0.000205639	0.000131417	0	0	0	0.000137505	0	0	0
A0A068QPU5	NA	COG0227	information storage and processing	J : Translation	Ribosomal protein L28	TIGR00009	Protein synthesis	Ribosomal proteins: synthesis and modification	ribosomal protein bL28	PF00830.15	Bacteria	Proteobacteria	Gammaproteobacteria	Enterobacterales	Morganellaceae	Xenorhabdus	Xenorhabdus doucetiae	0.000606948	0.000536361	0	0	0.00126064	0.000687062	0.000901918	0.000764245	0.000609283	0	0	0	0	0	0	0
A0A068QT39	NA	COG0364	metabolism	G : Carbohydrate	Glucose-6-phosphate 1-dehydrogenase	TIGR00871	Energy metabolism	Pentose phosphate pathway	glucose-6-phosphate dehydrogenase	PF02781.12	Bacteria	Proteobacteria	Gammaproteobacteria	Enterobacterales	Morganellaceae	Xenorhabdus	Xenorhabdus doucetiae	0	0	0	0	0	0	0	0	0	0	0	0	0.000113481	0	0	0
A0A068SMN1	NA	COG0050	information storage and processing	J : Translation	GTPases - translation elongation factors	TIGR00485	Protein synthesis	Translation factors	translation elongation factor Tu	PF00009.23	Bacteria	Proteobacteria	Alphaproteobacteria	Rhizobiales	Rhizobiaceae	Neorhizobium	Neorhizobium galegae	0.000199476	0	0	0	0.000171373	0.000136832	0.000160627	0	0	0	0	0	0	0	0	0
A0A068T766	NA	COG0148	metabolism	G : Carbohydrate	Enolase	TIGR01060	Energy metabolism	Glycolysis/gluconeogenesis	phosphopyruvate hydratase	PF00113.18	Bacteria	Proteobacteria	Alphaproteobacteria	Rhizobiales	Rhizobiaceae	Neorhizobium	Neorhizobium galegae	0	0	0	0	0	0	0	0	0	0	0	0	0	0	0.000127102	0
A0A068YXM4	NA	COG0093	information storage and processing	J : Translation	Ribosomal protein L14	TIGR01067	Protein synthesis	Ribosomal proteins: synthesis and modification	ribosomal protein uL14	PF00238.15	Bacteria	Proteobacteria	Gammaproteobacteria	Enterobacterales	Yersiniaceae	Serratia	Serratia symbiotica	0.000733297	0	0	0	0.0013442	0.00145087	0.000862923	0.000469106	0.000740704	0	0.00035458	0	0.00107978	0	0	0
A0A068Z3U1	NA	COG0001	metabolism	H : Coenzyme	Glutamate-1-semialdehyde aminotransferase	TIGR00713	Biosynthesis of cofactors, prosthetic groups, and carriers	Heme, porphyrin, and cobalamin	glutamate-1-semialdehyde-2,1-aminomutase	PF00202.17	Bacteria	Proteobacteria	Gammaproteobacteria	Enterobacterales	Yersiniaceae	Serratia	Serratia symbiotica	0	0	0	0	0	0	0	0	0.00016216	0	0	0	8.17e-05	0	0	0
A0A069CQI5	NA	COG0103	information storage and processing	J : Translation	Ribosomal protein S9	no hit	-	-	-	PF00380.15	Bacteria	Firmicutes	Bacilli	Lactobacillales	Leuconostocaceae	Weissella	Weissella oryzae	0	0	0	0	0	0.000411547	0.000572534	0.000422351	0	0	0	0	0	0	0	0
A0A069CUJ0	NA	COG0652	cellular processes and signaling	O : Posttranslational modification	Peptidyl-prolyl cis-trans isomerase (rotamase) - cyclophilin family	no hit	-	-	-	PF00160.17	Bacteria	Firmicutes	Bacilli	Lactobacillales	Leuconostocaceae	Weissella	Weissella oryzae	0	0	0	0	0	0	0	0	0.000133019	0	0	0	0	0	0	0
A0A069CWJ6	NA	COG0737	metabolism	F : Nucleotide	5'-nucleotidase/2',3'-cyclic phosphodiesterase and related esterases	no hit	-	-	-	PF02872.14	Bacteria	Bacteroidetes	Bacteroidia	Bacteroidales	Bacteroidaceae	Bacteroides	Bacteroides graminisolvens	0.000237618	0.000217559	0.000385895	0.000324059	0.000258714	0.00020649	0	0.00022278	0.000265413	0.000305384	0.000214515	0.000359273	0.000263001	0.000207596	0.000192855	0.000189398
A0A069CWL4	NA	COG2996	poorly characterized	S : Function unknown	Uncharacterized protein conserved in bacteria	no hit	-	-	-	PF13509.2	Bacteria	Bacteroidetes	Bacteroidia	Bacteroidales	Bacteroidaceae	Bacteroides	Bacteroides graminisolvens	0	0	0	0	0	0	0	0	0.000200682	0	0	0	0.000207358	0	0	0
A0A069CWM4	NA	COG0461	metabolism	F : Nucleotide	Orotate phosphoribosyltransferase	TIGR00336	Purines, pyrimidines, nucleosides, and nucleotides	Pyrimidine ribonucleotide biosynthesis	orotate phosphoribosyltransferase	PF00156.23	Bacteria	Bacteroidetes	Bacteroidia	Bacteroidales	Bacteroidaceae	Bacteroides	Bacteroides graminisolvens	0.000514586	0.000458746	0.000543189	0.000527091	0.00116577	0.00135684	0.00125966	0.00104209	0.000526111	0.000510132	0.000531939	0.000782993	0.000429085	0.000356456	0.000393328	0.000436965
A0A069CWN7	NA	COG2825	cellular processes and signaling	M : Cell wall	Outer membrane protein	no hit	-	-	-	PF03938.10	Bacteria	Bacteroidetes	Bacteroidia	Bacteroidales	Bacteroidaceae	Bacteroides	Bacteroides graminisolvens	0	0	0	0	0.000483442	0.000938617	0.00128728	0.00152307	0	0	0	0	0	0	0.000292102	0.000666719
A0A069CWP2	NA	COG0263	metabolism	E : Amino acid	Glutamate 5-kinase	no hit	-	-	-	PF01472.16	Bacteria	Bacteroidetes	Bacteroidia	Bacteroidales	Bacteroidaceae	Bacteroides	Bacteroides graminisolvens	0.000920577	0	0	0	0	0.000990762	0	0.00162181	0.000670022	0.000732356	0.000783656	0.00118295	0.000630716	0.000750965	0.000924992	0.000908409
A0A069CWT8	NA	COG0280	metabolism	C : Energy production and conversion	Phosphotransacetylase	TIGR00651	Central intermediary metabolism	Other	phosphate acetyltransferase	PF01515.15	Bacteria	Bacteroidetes	Bacteroidia	Bacteroidales	Bacteroidaceae	Bacteroides	Bacteroides graminisolvens	0.000588749	0.000543487	0.000736225	0.000606459	0.000343704	0.00042206	0.000208134	0.000281033	0.000802805	0.00112634	0.0010489	0.00109379	0.000567475	0.000892038	0.00114075	0.000760668
A0A069CWU5	NA	COG0312	poorly characterized	R : General function prediction only	Predicted Zn-dependent proteases and their inactivated homologs	no hit	-	-	-	PF01523.12	Bacteria	Bacteroidetes	Bacteroidia	Bacteroidales	Bacteroidaceae	Bacteroides	Bacteroides graminisolvens	0.000859088	0.000969193	0.00103656	0.00135572	0.000418794	0.00100483	0.000701372	0.000926133	0.000661259	0.00100764	0.00114374	0.00116538	0.000560192	0.000635336	0.00110537	0.00174299
A0A069CWV2	NA	COG0770	cellular processes and signaling	M : Cell wall	UDP-N-acetylmuramyl pentapeptide synthase	TIGR01143	Cell envelope	Biosynthesis and degradation of murein sacculus and peptidoglycan	UDP-N-acetylmuramoyl-tripeptide--D-alanyl-D-alanine ligase	PF08245.8	Bacteria	Bacteroidetes	Bacteroidia	Bacteroidales	Bacteroidaceae	Bacteroides	Bacteroides graminisolvens	0	0	0	0	0	0.000109817	0.000128963	0	9.16e-05	0	8.81e-05	0.00013117	0	7.37e-05	0.00011223	0
A0A069CWV3	NA	COG0057	metabolism	G : Carbohydrate	Glyceraldehyde-3-phosphate dehydrogenase/erythrose-4-phosphate dehydrogenase	TIGR01534	Energy metabolism	Glycolysis/gluconeogenesis	glyceraldehyde-3-phosphate dehydrogenase, type I	PF00044.20	Bacteria	Firmicutes	Bacilli	Lactobacillales	Leuconostocaceae	Weissella	Weissella oryzae	0	0	0	0	0	0	0	0	0	0.000110612	0	0	0	0	0	0
A0A069CX09	NA	COG0188	information storage and processing	L : Replication	Type IIA topoisomerase (DNA gyrase/topo II, topoisomerase IV), A subunit	no hit	-	-	-	PF00521.16	Bacteria	Bacteroidetes	Bacteroidia	Bacteroidales	Bacteroidaceae	Bacteroides	Bacteroides graminisolvens	0	0	0.000151745	0	0	0	0	6.22e-05	0.000141922	7.28e-05	6.92e-05	5.29e-05	7.72e-05	0	0	0
A0A069CX18	NA	COG1070	metabolism	G : Carbohydrate	Sugar (pentulose and hexulose) kinases	TIGR02627	-	-	rhamnulokinase	PF02782.12	Bacteria	Bacteroidetes	Bacteroidia	Bacteroidales	Bacteroidaceae	Bacteroides	Bacteroides graminisolvens	0	8.57e-05	0	0	0	0	0	0	0.000108514	0.000264556	0.000125093	0	6.98e-05	7.36e-05	0	0
A0A069CX20	NA	COG1438	information storage and processing	K : Transcription	Arginine repressor	no hit	-	-	-	PF01316.17	Bacteria	Bacteroidetes	Bacteroidia	Bacteroidales	Bacteroidaceae	Bacteroides	Bacteroides graminisolvens	0	0.000351902	0	0	0.000618428	0	0	0	0.000509879	0.000341617	0.000266147	0.000401757	0	0.000395725	0	0
A0A069CX31	GH43_31	COG3507	metabolism	G : Carbohydrate	Beta-xylosidase	no hit	-	-	-	PF04616.10	Bacteria	Bacteroidetes	Bacteroidia	Bacteroidales	Bacteroidaceae	Bacteroides	Bacteroides graminisolvens	0.000140555	0	0	0	0	0	0	0	0	0	0	0	0	0	0	0
A0A069CX37	NA	COG1629	metabolism	P : Inorganic ion	Outer membrane receptor proteins, mostly Fe transport	no hit	-	-	-	PF14905.2	Bacteria	Bacteroidetes	Bacteroidia	Bacteroidales	Bacteroidaceae	Bacteroides	Bacteroides graminisolvens	0	6.84e-05	0	0	0	0	0	0	0	0	0	0	0	0	0	0
A0A069CX40	NA	COG0612	poorly characterized	R : General function prediction only	Predicted Zn-dependent peptidases	no hit	-	-	-	PF05193.17	Bacteria	Bacteroidetes	Bacteroidia	Bacteroidales	Bacteroidaceae	Bacteroides	Bacteroides graminisolvens	0.000545023	0.000649123	0.00057565	0.000582752	0.000204359	0.000366415	0.000308344	0.00037356	0.00102707	0.00141281	0.00139271	0.00137154	0.000828955	0.000982642	0.000821695	0.000774894
A0A069CX54	NA	COG1610	poorly characterized	S : Function unknown	Uncharacterized conserved protein	no hit	-	-	-	PF09424.6	Bacteria	Bacteroidetes	Bacteroidia	Bacteroidales	Bacteroidaceae	Bacteroides	Bacteroides graminisolvens	0.000522619	0	0.000486247	0.000362411	0.000884788	0.000478356	0	0.000387249	0	0.00034419	0.000479148	0.000538195	0.000228581	0.000260774	0.000666993	0.000329222
A0A069CX58	NA	COG0696	metabolism	G : Carbohydrate	Phosphoglyceromutase	TIGR01307	Energy metabolism	Glycolysis/gluconeogenesis	phosphoglycerate mutase (2,3-diphosphoglycerate-independent)	PF06415.9	Bacteria	Bacteroidetes	Bacteroidia	Bacteroidales	Bacteroidaceae	Bacteroides	Bacteroides graminisolvens	0.000133188	0.000225956	0.000269599	0.00020622	0.000368569	0.000215444	0.000444146	0.000191125	0.000392443	0.000544798	0.000558947	0.00046741	0.000357557	0.000198917	0.000374836	0.000363722
A0A069CX67	NA	COG0520	metabolism	E : Amino acid	Selenocysteine lyase	no hit	-	-	-	PF00266.15	Bacteria	Bacteroidetes	Bacteroidia	Bacteroidales	Bacteroidaceae	Bacteroides	Bacteroides graminisolvens	0	0	0	0	0.00032805	0	0	0	0	0	0	0	0	0	0	0
A0A069CX72	NA	COG0532	information storage and processing	J : Translation	Translation initiation factor 2 (IF-2 GTPase)	TIGR00487	Protein synthesis	Translation factors	translation initiation factor IF-2	PF11987.4	Bacteria	Bacteroidetes	Bacteroidia	Bacteroidales	Bacteroidaceae	Bacteroides	Bacteroides graminisolvens	0.000300904	0.00016804	0.00019614	0	0.00013295	0.000212306	9.38e-05	0	0.000511081	0.000430697	0.000376868	0.000376929	0.00052647	0.000293224	0.000217187	0.000212225
A0A069CX98	NA	no hit	-	S : Function unknown	-	no hit	-	-	-	PF14063.2	Bacteria	Bacteroidetes	Bacteroidia	Bacteroidales	Bacteroidaceae	Bacteroides	Bacteroides graminisolvens	0	0.000419947	0.000327876	0.000423145	0.000666737	0.000620614	0.000659399	0.000679086	0.000323989	0.00122594	0.00123422	0.000935659	0.000838718	0.000863103	0.000815277	0.000822502
A0A069CXA6	NA	COG0215	information storage and processing	J : Translation	Cysteinyl-tRNA synthetase	TIGR00435	Protein synthesis	tRNA aminoacylation	cysteine--tRNA ligase	PF01406.15	Bacteria	Bacteroidetes	Bacteroidia	Bacteroidales	Bacteroidaceae	Bacteroides	Bacteroides graminisolvens	0.000174047	0.00025787	0.000203558	0.00017094	0	0.000108964	0.000329612	0.000242815	0.000321761	0.000312477	0.000341451	0.000353323	0.000168076	0.000201356	0.000425084	0.000395023
A0A069CXB1	NA	COG0289	metabolism	E : Amino acid	Dihydrodipicolinate reductase	TIGR00036	Amino acid biosynthesis	Aspartate family	4-hydroxy-tetrahydrodipicolinate reductase	PF05173.10	Bacteria	Bacteroidetes	Bacteroidia	Bacteroidales	Bacteroidaceae	Bacteroides	Bacteroides graminisolvens	0.00037202	0.000407241	0.000504057	0	0.000618493	0.000884757	0.000552768	0.000399816	0.000745244	0.000696789	0.000341035	0.00064233	0.000511113	0.000418809	0	0.000194303
A0A069CXB6	NA	COG1312	metabolism	G : Carbohydrate	D-mannonate dehydratase	TIGR00695	Energy metabolism	Sugars	mannonate dehydratase	PF03786.9	Bacteria	Bacteroidetes	Bacteroidia	Bacteroidales	Bacteroidaceae	Bacteroides	Bacteroides graminisolvens	0.000155412	0.000282588	0.000249458	0.000136362	0.00016921	0.00054025	0.000711363	0.000385578	0.0004128	0.00102831	0.000892419	0.000677421	0.000597335	0.000605241	0.000684844	0.000822404
A0A069CXD5	GH31	COG1501	metabolism	G : Carbohydrate	Alpha-glucosidases, family 31 of glycosyl hydrolases	no hit	-	-	-	PF01055.22	Bacteria	Bacteroidetes	Bacteroidia	Bacteroidales	Bacteroidaceae	Bacteroides	Bacteroides graminisolvens	0	0	0	6.82e-05	0	0	0	0	0.000112545	0	0.000108264	0	4.3e-05	0	0	0
A0A069CXE7	NA	COG0513	information storage and processing	L : Replication	Superfamily II DNA and RNA helicases	no hit	-	-	-	PF03880.11	Bacteria	Bacteroidetes	Bacteroidia	Bacteroidales	Bacteroidaceae	Bacteroides	Bacteroides graminisolvens	0	0	0	0	0	0	0	0	0	0	0	0	0.000210492	0	0	0
A0A069CXF2	NA	COG1808	poorly characterized	S : Function unknown	Predicted membrane protein	TIGR00341	Hypothetical proteins	Conserved	TIGR00341 family protein	PF04087.10	Bacteria	Bacteroidetes	Bacteroidia	Bacteroidales	Bacteroidaceae	Bacteroides	Bacteroides graminisolvens	0.000485197	0.000281991	0.000373102	0.000267107	0.000552351	0.000158905	0.000347638	0	0.000326954	0.000290376	0.000343899	0.00042628	0.000327202	0.000292824	0.000201489	0.000328767
A0A069CXG6	NA	COG0142	metabolism	H : Coenzyme	Geranylgeranyl pyrophosphate synthase	no hit	-	-	-	PF00348.13	Bacteria	Bacteroidetes	Bacteroidia	Bacteroidales	Bacteroidaceae	Bacteroides	Bacteroides graminisolvens	0	0	0	0	0	0.000494399	0	0	0	0.000114709	0	0.00022022	0	0	0	0
A0A069CXH0	NA	COG1893	metabolism	H : Coenzyme	Ketopantoate reductase	TIGR00745	Biosynthesis of cofactors, prosthetic groups, and carriers	Pantothenate and coenzyme A	2-dehydropantoate 2-reductase	PF02558.12	Bacteria	Bacteroidetes	Bacteroidia	Bacteroidales	Bacteroidaceae	Bacteroides	Bacteroides graminisolvens	0	0	0.000151266	0	0.000257534	0.00016695	0.00029444	0	0.000376714	0.0004928	0.00030643	0.000698635	0.000239658	0.000157869	0.000199288	0.000250472
A0A069CXH4	NA	COG0108	metabolism	H : Coenzyme	3,4-dihydroxy-2-butanone 4-phosphate synthase	TIGR00506	Biosynthesis of cofactors, prosthetic groups, and carriers	Riboflavin, FMN, and FAD	3,4-dihydroxy-2-butanone-4-phosphate synthase	PF00926.15	Bacteria	Bacteroidetes	Bacteroidia	Bacteroidales	Bacteroidaceae	Bacteroides	Bacteroides graminisolvens	0.00100839	0.000767123	0.000989573	0.00109302	0.00049218	0.000617886	0.000539549	0.000569591	0.000289563	0.000718558	0.000726808	0.00054656	0.000576268	0.000518542	0.000294617	0.000607105
A0A069CXI7	NA	COG0446	poorly characterized	R : General function prediction only	Uncharacterized NAD(FAD)-dependent dehydrogenases	no hit	-	-	-	PF07992.10	Bacteria	Bacteroidetes	Bacteroidia	Bacteroidales	Bacteroidaceae	Bacteroides	Bacteroides graminisolvens	0	0	0	6.66e-05	0	0	0	0	0	0	0	0	0	0	0	0
A0A069CXI8	NA	COG1592	metabolism	C : Energy production and conversion	Rubrerythrin	no hit	-	-	-	PF02915.13	Bacteria	Bacteroidetes	Bacteroidia	Bacteroidales	Bacteroidaceae	Bacteroides	Bacteroides graminisolvens	0.00166926	0.00167614	0.00189239	0.0016893	0.000937816	0.0016638	0.00131046	0.00118315	0.00125145	0.00169111	0.0019683	0.00180667	0.00110529	0.00150128	0.00168106	0.00177681
A0A069CXJ2	NA	COG0737	metabolism	F : Nucleotide	5'-nucleotidase/2',3'-cyclic phosphodiesterase and related esterases	no hit	-	-	-	PF00149.24	Bacteria	Bacteroidetes	Bacteroidia	Bacteroidales	Bacteroidaceae	Bacteroides	Bacteroides graminisolvens	0.000210764	0.000144536	0.00028773	0.000184929	0	0	0	0.000292884	0	0	0	0	0	0	0	0
A0A069CXJ7	NA	COG0577	cellular processes and signaling	V : Defense mechanisms	ABC-type antimicrobial peptide transport system, permease component	no hit	-	-	-	PF12704.3	Bacteria	Bacteroidetes	Bacteroidia	Bacteroidales	Bacteroidaceae	Bacteroides	Bacteroides graminisolvens	0	0	0	0	0	0	0	0	0.000244452	0.000214199	0.000308748	0.000187717	8.15e-05	0.000150236	0.000173123	0.000192348
A0A069CXJ9	NA	COG0329	metabolism	E : Amino acid	Dihydrodipicolinate synthase/N-acetylneuraminate lyase	TIGR00674	Amino acid biosynthesis	Aspartate family	4-hydroxy-tetrahydrodipicolinate synthase	PF00701.18	Bacteria	Bacteroidetes	Bacteroidia	Bacteroidales	Bacteroidaceae	Bacteroides	Bacteroides graminisolvens	0	0.000285537	0.000221896	0	0.000443884	0.000540773	0.000636466	0	0.000557396	0.000582353	0.000817306	0.000738462	0.0004697	0.000293077	0.00044797	0.000815197
A0A069CXK2	NA	COG1538	cellular processes and signaling	M : Cell wall	Outer membrane protein	no hit	-	-	-	PF02321.14	Bacteria	Bacteroidetes	Bacteroidia	Bacteroidales	Bacteroidaceae	Bacteroides	Bacteroides graminisolvens	0	0.000939383	0.000999929	0.00140416	0.000500053	0.000399932	0	0.000588032	0.000416444	0.00107029	0.00160678	0.00166072	0.00034779	0.000802499	0.000745516	0.000484738
A0A069CXL6	NA	no hit	-	S : Function unknown	-	no hit	-	-	-	PF10604.5	Bacteria	Bacteroidetes	Bacteroidia	Bacteroidales	Bacteroidaceae	Bacteroides	Bacteroides graminisolvens	0	0	0	0	0	0.000415433	0	0	0	0.000288108	0	0	0.000250157	0.00041937	0.000320079	0.000390784
A0A069CXL7	NA	COG0114	metabolism	C : Energy production and conversion	Fumarase	TIGR00979	Energy metabolism	TCA cycle	fumarate hydratase, class II	PF00206.16	Bacteria	Bacteroidetes	Bacteroidia	Bacteroidales	Bacteroidaceae	Bacteroides	Bacteroides graminisolvens	0	0	0.000109583	0.000115878	0.000143792	0.000114766	0	0	0.000119736	0.0002518	0.000396172	0.000263051	6.92e-05	0.000166761	0.000256528	0.000344097
A0A069CXM1	NA	no hit	-	S : Function unknown	-	no hit	-	-	-	no hit	Bacteria	Bacteroidetes	Bacteroidia	Bacteroidales	Bacteroidaceae	Bacteroides	Bacteroides graminisolvens	0	0	0	0	0	0.000188316	0.000221347	0	0	0	0	0	0	0	0	0
A0A069CXM8	NA	COG2825	cellular processes and signaling	M : Cell wall	Outer membrane protein	no hit	-	-	-	PF03938.10	Bacteria	Bacteroidetes	Bacteroidia	Bacteroidales	Bacteroidaceae	Bacteroides	Bacteroides graminisolvens	0	0	0	0.000299995	0	0.000990249	0.000740887	0.000961666	0	0.000231751	0.000470194	0.000527203	0	0.000281532	0.000630022	0.00134002
A0A069CXN3	NA	COG0263	metabolism	E : Amino acid	Glutamate 5-kinase	TIGR01027	Amino acid biosynthesis	Glutamate family	glutamate 5-kinase	PF00696.24	Bacteria	Bacteroidetes	Bacteroidia	Bacteroidales	Bacteroidaceae	Bacteroides	Bacteroides graminisolvens	0	0	0	0	0	0	0	0	0	0.000284651	0.000150958	0	0	0	0	0
A0A069CXQ9	NA	no hit	-	S : Function unknown	-	no hit	-	-	-	PF07980.7	Bacteria	Bacteroidetes	Bacteroidia	Bacteroidales	Bacteroidaceae	Bacteroides	Bacteroides graminisolvens	0.000338293	0.000210979	0.000249037	0.000249873	0.000111308	8.88e-05	0	0	9.27e-05	0.000148714	0.000166082	0.000214705	0.000149146	8.42e-05	8.3e-05	0.000156217
A0A069CXS1	NA	COG0282	metabolism	C : Energy production and conversion	Acetate kinase	TIGR00016	Energy metabolism	Fermentation	acetate kinase	PF00871.13	Bacteria	Bacteroidetes	Bacteroidia	Bacteroidales	Bacteroidaceae	Bacteroides	Bacteroides graminisolvens	0.000237763	0.000480663	0.000480979	0.000350882	0.000530399	0.000753471	0.000351872	0.000471474	0.000671419	0.000448353	0.000449603	0.000482875	0.000694843	0.000333461	0.000443115	0.0004722
A0A069CXS8	NA	no hit	-	S : Function unknown	-	no hit	-	-	-	no hit	Bacteria	Bacteroidetes	Bacteroidia	Bacteroidales	Bacteroidaceae	Bacteroides	Bacteroides graminisolvens	0	0	0	0	0	0	0	0	0.000290924	0.000125508	0.000103515	0	0.000151234	0	0	0
A0A069CXT2	NA	COG0294	metabolism	H : Coenzyme	Dihydropteroate synthase and related enzymes	TIGR01496	Biosynthesis of cofactors, prosthetic groups, and carriers	Folic acid	dihydropteroate synthase	PF00809.18	Bacteria	Bacteroidetes	Bacteroidia	Bacteroidales	Bacteroidaceae	Bacteroides	Bacteroides graminisolvens	0	0	0	0	0	0	0	0.000183019	0.000231888	0	0.000186822	0.000155086	0.000304472	0.000178819	0.000137634	0.000372497
A0A069CXT9	NA	COG1940	information storage and processing	K : Transcription	Transcriptional regulator/sugar kinase	no hit	-	-	-	PF00480.16	Bacteria	Bacteroidetes	Bacteroidia	Bacteroidales	Bacteroidaceae	Bacteroides	Bacteroides graminisolvens	0.00145195	0.00125124	0.00143007	0.00172525	0.00117184	0.00131346	0.00103269	0.00094216	0.0013106	0.0011371	0.00120542	0.00106394	0.00100721	0.000862947	0.00117263	0.00146288
A0A069CXU0	NA	COG1136	cellular processes and signaling	V : Defense mechanisms	ABC-type antimicrobial peptide transport system, ATPase component	no hit	-	-	-	PF00005.23	Bacteria	Bacteroidetes	Bacteroidia	Bacteroidales	Bacteroidaceae	Bacteroides	Bacteroides graminisolvens	0	0	0	0	0.000308788	0	0	0	0.000166734	0	0	0	0	0	0	0
A0A069CXU4	NA	COG0845	cellular processes and signaling	M : Cell wall	Membrane-fusion protein	TIGR01730	Transport and binding proteins	Unknown substrate	efflux transporter, RND family, MFP subunit	PF13437.2	Bacteria	Bacteroidetes	Bacteroidia	Bacteroidales	Bacteroidaceae	Bacteroides	Bacteroides graminisolvens	0.000385713	0.000648149	0.000871708	0.000832483	0.000764971	0.000435663	0.00066622	0.00113117	0.0015051	0.00205478	0.00243069	0.00279695	0.00116442	0.00155759	0.00193695	0.00218951
A0A069CXW1	NA	COG1322	poorly characterized	S : Function unknown	Uncharacterized protein conserved in bacteria	no hit	-	-	-	PF02646.12	Bacteria	Bacteroidetes	Bacteroidia	Bacteroidales	Bacteroidaceae	Bacteroides	Bacteroides graminisolvens	0	0	0	0	0	0	0	0	0	8.95e-05	0	0	0	0	0	0
A0A069CXW6	NA	COG0708	information storage and processing	L : Replication	Exonuclease III	TIGR00633	DNA metabolism	DNA replication, recombination, and repair	exodeoxyribonuclease III (xth)	PF03372.19	Bacteria	Bacteroidetes	Bacteroidia	Bacteroidales	Bacteroidaceae	Bacteroides	Bacteroides graminisolvens	0.000243253	0.000277733	0.00045801	0.000213436	0.00026485	0.000211193	0	0	0	0.000293802	0	0	0	0	0	0
A0A069CXW9	GT2	COG0463	cellular processes and signaling	M : Cell wall	Glycosyltransferases involved in cell wall biogenesis	no hit	-	-	-	PF00535.22	Bacteria	Bacteroidetes	Bacteroidia	Bacteroidales	Bacteroidaceae	Bacteroides	Bacteroides graminisolvens	0	0	0	0	0.000137591	0	0	0	0	0	0	0	0	0	0	0
A0A069CXX0	NA	COG2605	poorly characterized	R : General function prediction only	Predicted kinase related to galactokinase and mevalonate kinase	no hit	-	-	-	PF07959.8	Bacteria	Bacteroidetes	Bacteroidia	Bacteroidales	Bacteroidaceae	Bacteroides	Bacteroides graminisolvens	0	0	0	0	0	0	0	5.76e-05	0	0	6.33e-05	4.9e-05	0	6.6e-05	0	0
A0A069CXX2	NA	COG4775	cellular processes and signaling	M : Cell wall	Outer membrane protein/protective antigen OMA87	no hit	-	-	-	PF07244.11	Bacteria	Bacteroidetes	Bacteroidia	Bacteroidales	Bacteroidaceae	Bacteroides	Bacteroides graminisolvens	0.000111844	0	0.000140594	0.000196004	0	0	0	0	0.000171723	0	0	0.000124797	0.000123625	0	0	0
A0A069CXX6	NA	COG0466	cellular processes and signaling	O : Posttranslational modification	ATP-dependent Lon protease, bacterial type	TIGR00763	Protein fate	Degradation of proteins, peptides, and glycopeptides	endopeptidase La	PF05362.9	Bacteria	Bacteroidetes	Bacteroidia	Bacteroidales	Bacteroidaceae	Bacteroides	Bacteroides graminisolvens	0	5.2e-05	0	0	0	0	0	0	0.000167256	4.52e-05	8.43e-05	9.77e-05	8.08e-05	0	0	0
A0A069CXY0	NA	COG0014	metabolism	E : Amino acid	Gamma-glutamyl phosphate reductase	no hit	-	-	-	no hit	Bacteria	Bacteroidetes	Bacteroidia	Bacteroidales	Bacteroidaceae	Bacteroides	Bacteroides graminisolvens	0	0	0	0	0	0	0	0	0.000361812	0.00101676	0	0	0	0	0	0
A0A069CXZ1	NA	COG0034	metabolism	F : Nucleotide	Glutamine phosphoribosylpyrophosphate amidotransferase	no hit	-	-	-	no hit	Bacteria	Bacteroidetes	Bacteroidia	Bacteroidales	Bacteroidaceae	Bacteroides	Bacteroides graminisolvens	7.55e-05	6.73e-05	7.97e-05	0.000106059	0	8.53e-05	0.000223756	9.51e-05	0.00014188	8.18e-05	9.2e-05	0.000101696	5.43e-05	0.000136013	0	7.82e-05
A0A069CXZ8	NA	COG0230	information storage and processing	J : Translation	Ribosomal protein L34	TIGR01030	Protein synthesis	Ribosomal proteins: synthesis and modification	ribosomal protein bL34	PF00468.13	Bacteria	Bacteroidetes	Bacteroidia	Bacteroidales	Bacteroidaceae	Bacteroides	Bacteroides graminisolvens	0	0	0	0	0.0012886	0.00102848	0	0	0	0	0	0	0	0	0	0
A0A069CXZ9	NA	COG0337	metabolism	E : Amino acid	3-dehydroquinate synthetase	TIGR01357	Amino acid biosynthesis	Aromatic amino acid family	3-dehydroquinate synthase	PF01761.16	Bacteria	Bacteroidetes	Bacteroidia	Bacteroidales	Bacteroidaceae	Bacteroides	Bacteroides graminisolvens	0.000174579	0.000160109	0.000283136	0.000152972	0.000189821	0	0	0	0.000204993	0.000336095	0.000196285	0.000222282	0.000187681	0	0.000291325	0.000133205
A0A069CY01	NA	COG0436	metabolism	E : Amino acid	Aspartate/tyrosine/aromatic aminotransferase	TIGR03542	-	-	LL-diaminopimelate aminotransferase	PF00155.17	Bacteria	Bacteroidetes	Bacteroidia	Bacteroidales	Bacteroidaceae	Bacteroides	Bacteroides graminisolvens	0	0	0	0	0	0	0	0	0	0	0.000152494	0	0	0	0	0
A0A069CY02	NA	COG2908	poorly characterized	S : Function unknown	Uncharacterized protein conserved in bacteria	no hit	-	-	-	PF00149.24	Bacteria	Bacteroidetes	Bacteroidia	Bacteroidales	Bacteroidaceae	Bacteroides	Bacteroides graminisolvens	0	0	0	0	0	0	0	0	0	0	0	0	0	0	0	0.000183677
A0A069CY06	NA	COG3968	poorly characterized	R : General function prediction only	Uncharacterized protein related to glutamine synthetase	no hit	-	-	-	PF12437.4	Bacteria	Bacteroidetes	Bacteroidia	Bacteroidales	Bacteroidaceae	Bacteroides	Bacteroides graminisolvens	0.000428525	0.000259551	0.000333815	0.000275565	0.000549658	0.000355628	0.000437924	0.000306004	0.000617867	0.000452498	0.000561436	0.000565412	0.000364395	0.000290186	0.000271101	0.000391389
A0A069CY11	NA	COG0436	metabolism	E : Amino acid	Aspartate/tyrosine/aromatic aminotransferase	no hit	-	-	-	PF00155.17	Bacteria	Bacteroidetes	Bacteroidia	Bacteroidales	Bacteroidaceae	Bacteroides	Bacteroides graminisolvens	0.000214403	0.000177542	0.000256611	0.000201403	0.00037607	0.000986084	0.00069967	0.000473888	0.000620366	0.000766501	0.000778772	0.000796969	0.000625854	0.000517832	0.00078694	0.000655068
A0A069CY13	NA	COG0133	metabolism	E : Amino acid	Tryptophan synthase beta chain	TIGR00263	Amino acid biosynthesis	Aromatic amino acid family	tryptophan synthase, beta subunit	PF00291.21	Bacteria	Bacteroidetes	Bacteroidia	Bacteroidales	Bacteroidaceae	Bacteroides	Bacteroides graminisolvens	0	0	0	0	0	0	0	0	0.000129132	0	0	0	0	0	0	0
A0A069CY15	NA	COG0312	poorly characterized	R : General function prediction only	Predicted Zn-dependent proteases and their inactivated homologs	no hit	-	-	-	PF01523.12	Bacteria	Bacteroidetes	Bacteroidia	Bacteroidales	Bacteroidaceae	Bacteroides	Bacteroides graminisolvens	0.000629183	0.000565975	0.00104765	0.000728439	0.0009665	0.00111224	0.000561125	0.000737648	0.00087928	0.00115696	0.00137922	0.0011424	0.000688727	0.000882056	0.00105169	0.00101991
A0A069CY18	NA	COG0423	information storage and processing	J : Translation	Glycyl-tRNA synthetase (class II)	TIGR00389	Protein synthesis	tRNA aminoacylation	glycine--tRNA ligase	PF03129.16	Bacteria	Bacteroidetes	Bacteroidia	Bacteroidales	Bacteroidaceae	Bacteroides	Bacteroides graminisolvens	0.000125034	0.000123888	9.74e-05	0.000225216	0.000130618	0.000138938	0.000244854	0.000116201	0.000224615	0.00015418	0.000250623	0.00027794	0.000265565	0.000140019	0.000194735	9.56e-05
A0A069CY27	NA	COG2971	metabolism	G : Carbohydrate	Predicted N-acetylglucosamine kinase	no hit	-	-	-	no hit	Bacteria	Bacteroidetes	Bacteroidia	Bacteroidales	Bacteroidaceae	Bacteroides	Bacteroides graminisolvens	0.000218238	0.000250572	0.000469212	0.000191486	0.000712841	0.000379297	0.000573898	0.000550144	0.000197885	0.000363718	0.000408963	0.000243205	0.000203131	0.000423246	0.000177127	0.000293126
A0A069CY28	NA	COG4806	metabolism	G : Carbohydrate	L-rhamnose isomerase	TIGR01748	Energy metabolism	Sugars	L-rhamnose isomerase	PF06134.7	Bacteria	Bacteroidetes	Bacteroidia	Bacteroidales	Bacteroidaceae	Bacteroides	Bacteroides graminisolvens	0.000147585	0.000406199	0.000360748	0.000287604	0.000321377	0.000256522	0.000486544	0.000269216	0.000700135	0.000648293	0.000763782	0.000717402	0.000507457	0.000430855	0.000611156	0.000782077
A0A069CY32	GH105	COG4225	poorly characterized	R : General function prediction only	Predicted unsaturated glucuronyl hydrolase involved in regulation of bacterial surface properties, and related proteins	no hit	-	-	-	PF07470.9	Bacteria	Bacteroidetes	Bacteroidia	Bacteroidales	Bacteroidaceae	Bacteroides	Bacteroides graminisolvens	0	0	0	0	0.000161075	0	0.000178917	0	0	0	0	0	0	0	0	0
A0A069CY34	NA	COG1136	cellular processes and signaling	V : Defense mechanisms	ABC-type antimicrobial peptide transport system, ATPase component	no hit	-	-	-	PF00005.23	Bacteria	Bacteroidetes	Bacteroidia	Bacteroidales	Bacteroidaceae	Bacteroides	Bacteroides graminisolvens	0	0.000531992	0.000348134	0	0	0	0.000295586	0.000246148	0.000922664	0.00126905	0.0011849	0.00113389	0.0003766	0.000815019	0.00104719	0.000412219
A0A069CY35	NA	COG4992	metabolism	E : Amino acid	Ornithine/acetylornithine aminotransferase	no hit	-	-	-	PF00202.17	Bacteria	Bacteroidetes	Bacteroidia	Bacteroidales	Bacteroidaceae	Bacteroides	Bacteroides graminisolvens	0.000215194	0.000447303	0.000577068	0.000466552	0.000621241	0.000190771	0.000413101	0.000318776	0.000681255	0.000830853	0.000854202	0.000712974	0.000483469	0.00060585	0.000763837	0.000597589
A0A069CY39	NA	COG1538	cellular processes and signaling	M : Cell wall	Outer membrane protein	no hit	-	-	-	PF02321.14	Bacteria	Bacteroidetes	Bacteroidia	Bacteroidales	Bacteroidaceae	Bacteroides	Bacteroides graminisolvens	0.000303474	0.000721687	0.000742798	0.00075473	0.000214766	0.000256707	0.000585157	0.000437487	0.00113288	0.00142636	0.00171248	0.00161466	0.000575054	0.0010163	0.00147109	0.00171499
A0A069CY43	NA	COG1629	metabolism	P : Inorganic ion	Outer membrane receptor proteins, mostly Fe transport	TIGR04056	Transport and binding proteins	Unknown substrate	TonB-linked outer membrane protein, SusC/RagA family	PF07715.11	Bacteria	Bacteroidetes	Bacteroidia	Bacteroidales	Bacteroidaceae	Bacteroides	Bacteroides graminisolvens	0.00147887	0.00078893	0.000462807	0.0004506	0.000796159	0.000571351	0.000154659	9.69e-05	0	0	0	0	0	0	0	0
A0A069CY47	NA	COG4656	metabolism	C : Energy production and conversion	Predicted NADH:ubiquinone oxidoreductase, subunit RnfC	TIGR01945	Energy metabolism	Electron transport	electron transport complex, RnfABCDGE type, C subunit	PF01512.13	Bacteria	Bacteroidetes	Bacteroidia	Bacteroidales	Bacteroidaceae	Bacteroides	Bacteroides graminisolvens	0	0.000136222	0.0002719	0	0.000426646	0.000259874	0.000203252	0	0.000391344	0.000374139	0.000409272	0.000413459	0.000179845	0.000164977	0.0004289	0.000374804
A0A069CY49	NA	COG1186	information storage and processing	J : Translation	Protein chain release factor B	no hit	-	-	-	PF03462.14	Bacteria	Bacteroidetes	Bacteroidia	Bacteroidales	Bacteroidaceae	Bacteroides	Bacteroides graminisolvens	0	0	0	0	0	0	0	0	0.000202987	0.00011984	0.000182786	0	0.000179213	0.000190299	0.000250244	0.000148649
A0A069CY54	NA	no hit	-	S : Function unknown	-	no hit	-	-	-	no hit	Bacteria	Bacteroidetes	Bacteroidia	Bacteroidales	Bacteroidaceae	Bacteroides	Bacteroides graminisolvens	0	0	0	0	0	0	0	0	0	0	0	0	0.000318305	0	0	0
A0A069CY57	NA	COG0165	metabolism	E : Amino acid	Argininosuccinate lyase	TIGR00838	Amino acid biosynthesis	Glutamate family	argininosuccinate lyase	PF00206.16	Bacteria	Bacteroidetes	Bacteroidia	Bacteroidales	Bacteroidaceae	Bacteroides	Bacteroides graminisolvens	0.00015879	0.000125776	0.000113986	0.000189849	0.000184528	0.00029862	0.000280379	0.000168882	0.000352644	0.000209581	0.000136264	0.000214281	0.000144064	8.02e-05	0.000331021	0
A0A069CY58	NA	COG0769	cellular processes and signaling	M : Cell wall	UDP-N-acetylmuramyl tripeptide synthase	TIGR01085	Cell envelope	Biosynthesis and degradation of murein sacculus and peptidoglycan	UDP-N-acetylmuramyl-tripeptide synthetase	PF08245.8	Bacteria	Bacteroidetes	Bacteroidia	Bacteroidales	Bacteroidaceae	Bacteroides	Bacteroides graminisolvens	0.000127155	0.000215484	0	0	0	0	0	0	0.000118916	8.62e-05	0	0	0.000114835	0	0	0
A0A069CY61	NA	COG0773	cellular processes and signaling	M : Cell wall	UDP-N-acetylmuramate-alanine ligase	no hit	-	-	-	PF08245.8	Bacteria	Bacteroidetes	Bacteroidia	Bacteroidales	Bacteroidaceae	Bacteroides	Bacteroides graminisolvens	0	0	0	0	0	0.000230004	0	0	0	0	0	0	0	0	0	0
A0A069CY63	NA	COG0117	metabolism	H : Coenzyme	Pyrimidine deaminase	TIGR00326	Biosynthesis of cofactors, prosthetic groups, and carriers	Riboflavin, FMN, and FAD	riboflavin biosynthesis protein RibD	PF01872.13	Bacteria	Bacteroidetes	Bacteroidia	Bacteroidales	Bacteroidaceae	Bacteroides	Bacteroides graminisolvens	0	0	0.000141168	0	0	0	0	0	0	0	0	0	0	0	0	0
A0A069CY64	NA	COG0206	cellular processes and signaling	D : Cell cycle control	Cell division GTPase	no hit	-	-	-	PF00091.21	Bacteria	Bacteroidetes	Bacteroidia	Bacteroidales	Bacteroidaceae	Bacteroides	Bacteroides graminisolvens	0.000789035	0.000571208	0.000574701	0.000663183	0.000725164	0.000521589	0.000388741	0.000266829	0.000750447	0.000531179	0.000609219	0.000459211	0.000460798	0.000376282	0.00046423	0.00032808
A0A069CY70	NA	COG4775	cellular processes and signaling	M : Cell wall	Outer membrane protein/protective antigen OMA87	no hit	-	-	-	PF01103.19	Bacteria	Bacteroidetes	Bacteroidia	Bacteroidales	Bacteroidaceae	Bacteroides	Bacteroides graminisolvens	0.000273956	0.000233175	0	0	0.000370205	0.000295586	0	0.000303346	0.000554833	0	0.000233798	0.000533166	0.00018817	0	0	0
A0A069CY78	NA	COG0520	metabolism	E : Amino acid	Selenocysteine lyase	no hit	-	-	-	PF00266.15	Bacteria	Bacteroidetes	Bacteroidia	Bacteroidales	Bacteroidaceae	Bacteroides	Bacteroides graminisolvens	0	0	0	0	0.000651193	0	0	0	0	0.000492264	0.000399467	0.000309303	0	0.00035827	0.000568723	0.000652731
A0A069CY81	NA	no hit	-	S : Function unknown	-	no hit	-	-	-	PF07610.7	Bacteria	Bacteroidetes	Bacteroidia	Bacteroidales	Bacteroidaceae	Bacteroides	Bacteroides graminisolvens	0	0	0	0	0	0	0	0	0	0	0	0	0	0	0.000468595	0
A0A069CY83	NA	COG0078	metabolism	E : Amino acid	Ornithine carbamoyltransferase	no hit	-	-	-	PF02729.17	Bacteria	Bacteroidetes	Bacteroidia	Bacteroidales	Bacteroidaceae	Bacteroides	Bacteroides graminisolvens	0	0.000197215	0.00015817	0.000209094	0	0.000168525	0	0	0	0.000124362	0.00013485	0.000149208	0.000110281	0	0	0.000154258
A0A069CY88	NA	no hit	-	S : Function unknown	-	no hit	-	-	-	PF07313.8	Bacteria	Bacteroidetes	Bacteroidia	Bacteroidales	Bacteroidaceae	Bacteroides	Bacteroides graminisolvens	0	0	0.000476978	0.000281912	0.000316737	0.000409564	0.00057034	0.000370711	0.000491057	0.000436318	0.000376874	0.000356977	0.000384924	0.000345346	0.000348587	0.000375893
A0A069CY90	NA	COG0235	metabolism	G : Carbohydrate	Ribulose-5-phosphate 4-epimerase and related epimerases and aldolases	no hit	-	-	-	PF00596.17	Bacteria	Bacteroidetes	Bacteroidia	Bacteroidales	Bacteroidaceae	Bacteroides	Bacteroides graminisolvens	0	0	0	0	0	0	0	0	0	0	0	0	0	0.000221696	0	0.000290255
A0A069CY91	NA	COG1181	cellular processes and signaling	M : Cell wall	D-alanine-D-alanine ligase and related ATP-grasp enzymes	TIGR01205	Cell envelope	Biosynthesis and degradation of murein sacculus and peptidoglycan	D-alanine--D-alanine ligase	PF07478.9	Bacteria	Bacteroidetes	Bacteroidia	Bacteroidales	Bacteroidaceae	Bacteroides	Bacteroides graminisolvens	0.000131878	0.000321895	0.00015761	0.000247402	0	0.000164913	0	0	0.00016344	0.00024814	0.000249732	0.000212231	0.000138095	0.000119924	0.000195847	0.000206051
A0A069CY95	NA	COG3560	poorly characterized	R : General function prediction only	Predicted oxidoreductase related to nitroreductase	no hit	-	-	-	PF00881.20	Bacteria	Bacteroidetes	Bacteroidia	Bacteroidales	Bacteroidaceae	Bacteroides	Bacteroides graminisolvens	0.000544842	0.000492761	0.00108748	0.00159703	0.00148585	0.00249659	0.00256588	0.0027202	0.00249145	0.00298137	0.00391995	0.00331454	0.00181205	0.00279171	0.00381633	0.00320208
A0A069CY98	NA	COG0137	metabolism	E : Amino acid	Argininosuccinate synthase	no hit	-	-	-	PF00764.15	Bacteria	Bacteroidetes	Bacteroidia	Bacteroidales	Bacteroidaceae	Bacteroides	Bacteroides graminisolvens	0.000815806	0.000734438	0.00086169	0.00048967	0.00108492	0.00116412	0.000988324	0.000852414	0.00107232	0.00108831	0.000942074	0.00085819	0.00092161	0.000710302	0.00070202	0.000627406
A0A069CYA1	NA	COG1917	poorly characterized	S : Function unknown	Uncharacterized conserved protein, contains double-stranded beta-helix domain	no hit	-	-	-	PF07883.7	Bacteria	Bacteroidetes	Bacteroidia	Bacteroidales	Bacteroidaceae	Bacteroides	Bacteroides graminisolvens	0	0	0	0	0	0	0	0	0.000378956	0.00034959	0.000606554	0.000427091	0.000429085	0.000341296	0	0.00041832
A0A069CYA9	NA	COG0231	information storage and processing	J : Translation	Translation elongation factor P (EF-P)/translation initiation factor 5A (eIF-5A)	TIGR00038	Protein synthesis	Translation factors	translation elongation factor P	PF09285.7	Bacteria	Bacteroidetes	Bacteroidia	Bacteroidales	Bacteroidaceae	Bacteroides	Bacteroides graminisolvens	0.00047932	0.000527225	0.000389458	0	0.000439726	0.000569161	0.00050274	0	0.000909737	0.000545578	0.000536043	0.000627958	0.000839911	0.000287759	0.000265689	0
A0A069CYB0	NA	COG0304	metabolism	I : Lipid	3-oxoacyl-(acyl-carrier-protein) synthase	TIGR03150	Fatty acid and phospholipid metabolism	Biosynthesis	beta-ketoacyl-acyl-carrier-protein synthase II	PF00109.22	Bacteria	Bacteroidetes	Bacteroidia	Bacteroidales	Bacteroidaceae	Bacteroides	Bacteroides graminisolvens	0.000214355	0.000336483	0.000354517	0.000199837	0.00039366	0.000297339	0.000177213	0.000418451	0.000327599	0.000479169	0.000391842	0.000669615	0.000350164	0.000321262	0.000477551	0.00073755
A0A069CYB2	GH2	COG3250	metabolism	G : Carbohydrate	Beta-galactosidase/beta-glucuronidase	no hit	-	-	-	PF02837.14	Bacteria	Bacteroidetes	Bacteroidia	Bacteroidales	Bacteroidaceae	Bacteroides	Bacteroides graminisolvens	7.06e-05	0	0	0	0	0	0	0	0	0	0	0	0	0	0	0
A0A069CYB5	NA	COG1785	metabolism	P : Inorganic ion	Alkaline phosphatase	no hit	-	-	-	PF00245.16	Bacteria	Bacteroidetes	Bacteroidia	Bacteroidales	Bacteroidaceae	Bacteroides	Bacteroides graminisolvens	0.000466496	0.000422432	0.000607946	0.000541574	0.000286968	0.000305474	0.000403458	0.000365414	0.000226555	0.000479264	0.000554082	0.000504061	0.000241328	0.000434054	0.000194821	0.000425975
A0A069CYB6	NA	COG1003	metabolism	E : Amino acid	Glycine cleavage system protein P (pyridoxal-binding), C-terminal domain	TIGR00461	Energy metabolism	Amino acids and amines	glycine dehydrogenase	PF02347.12	Bacteria	Bacteroidetes	Bacteroidia	Bacteroidales	Bacteroidaceae	Bacteroides	Bacteroides graminisolvens	0.00013178	0.000144703	0.00013641	0.00020449	0.00013593	0.000146925	0.000157988	5.95e-05	6.71e-05	0.000177869	0.000160205	0.000293371	3.51e-05	9.29e-05	4.26e-05	0.000117535
A0A069CYC0	NA	COG4866	poorly characterized	S : Function unknown	Uncharacterized conserved protein	no hit	-	-	-	PF09924.5	Bacteria	Bacteroidetes	Bacteroidia	Bacteroidales	Bacteroidaceae	Bacteroides	Bacteroides graminisolvens	0.000166956	0.000140862	0.000163489	0	0.000278345	0.000180139	0.000248532	0	0	0.000133156	0.000224353	0	0	0	0	0
A0A069CYC2	NA	COG0232	metabolism	F : Nucleotide	dGTP triphosphohydrolase	TIGR01353	Purines, pyrimidines, nucleosides, and nucleotides	Nucleotide and nucleoside interconversions	putative dGTPase	PF13286.2	Bacteria	Bacteroidetes	Bacteroidia	Bacteroidales	Bacteroidaceae	Bacteroides	Bacteroides graminisolvens	0	0	0	0	0	0	0	0	0	0	0.000151085	0.000140938	0	0	0	0
A0A069CYC3	NA	COG1028	metabolism	I : Lipid	Dehydrogenases with different specificities (related to short-chain alcohol dehydrogenases)	no hit	-	-	-	PF00106.21	Bacteria	Bacteroidetes	Bacteroidia	Bacteroidales	Bacteroidaceae	Bacteroides	Bacteroides graminisolvens	0.00142053	0.00145501	0.00140311	0.000876284	0.000802529	0.0019153	0.00153137	0.00165473	0.00126808	0.00160636	0.00126944	0.00210925	0.00117657	0.00133672	0.000874974	0.00120956
A0A069CYC6	GH3	COG1472	metabolism	G : Carbohydrate	Beta-glucosidase-related glycosidases	no hit	-	-	-	PF01915.18	Bacteria	Bacteroidetes	Bacteroidia	Bacteroidales	Bacteroidaceae	Bacteroides	Bacteroides graminisolvens	0.000115796	5.79e-05	0	0	0	0	0	0	4.9e-05	0	0	0	4.37e-05	0	0	0
A0A069CYC8	NA	COG1052	metabolism	C : Energy production and conversion	Lactate dehydrogenase and related dehydrogenases	no hit	-	-	-	PF02826.15	Bacteria	Bacteroidetes	Bacteroidia	Bacteroidales	Bacteroidaceae	Bacteroides	Bacteroides graminisolvens	0.000340894	0.000506767	0.000272894	0.000176468	0.000759294	0.000815077	0.00101267	0.000937038	0.00131848	0.0021488	0.00165104	0.00189671	0.000626312	0.0016315	0.0013084	0.00137751
A0A069CYD4	NA	COG0849	cellular processes and signaling	D : Cell cycle control	Actin-like ATPase involved in cell division	TIGR01174	Cellular processes	Cell division	cell division protein FtsA	PF14450.2	Bacteria	Bacteroidetes	Bacteroidia	Bacteroidales	Bacteroidaceae	Bacteroides	Bacteroides graminisolvens	0.00072335	0.000736657	0.000970747	0.000732008	0.000345893	0.000485268	0.000364873	0.000286991	0.000731205	0.000630086	0.000442651	0.000656865	0.000446601	0.000556707	0.000522485	0.000545433
A0A069CYE8	GH127	COG3533	poorly characterized	S : Function unknown	Uncharacterized protein conserved in bacteria	no hit	-	-	-	PF07944.8	Bacteria	Bacteroidetes	Bacteroidia	Bacteroidales	Bacteroidaceae	Bacteroides	Bacteroides graminisolvens	0	0	0	0	0	0	0	0	4.52e-05	0	0	0	0	0	0	0
A0A069CYF3	NA	COG2267	metabolism	I : Lipid	Lysophospholipase	no hit	-	-	-	PF12695.3	Bacteria	Bacteroidetes	Bacteroidia	Bacteroidales	Bacteroidaceae	Bacteroides	Bacteroides graminisolvens	0	0	0	0	0	0	0	0	9.81e-05	0.00015372	0.000109639	0	0	0	0	0
A0A069CYF7	NA	COG0396	cellular processes and signaling	O : Posttranslational modification	ABC-type transport system involved in Fe-S cluster assembly, ATPase component	TIGR01978	Biosynthesis of cofactors, prosthetic groups, and carriers	Other	FeS assembly ATPase SufC	PF00005.23	Bacteria	Bacteroidetes	Bacteroidia	Bacteroidales	Bacteroidaceae	Bacteroides	Bacteroides graminisolvens	0.00106045	0.000899085	0.000920319	0.00101614	0.00126005	0.00128289	0.00174195	0.00122858	0.000662186	0.00147235	0.000914203	0.00177339	0.000408704	0.000778315	0.000563723	0.00116103
A0A069CYG1	NA	no hit	-	S : Function unknown	-	no hit	-	-	-	PF10459.5	Bacteria	Bacteroidetes	Bacteroidia	Bacteroidales	Bacteroidaceae	Bacteroides	Bacteroides graminisolvens	5.97e-05	0	0	0	0	0	0	0	0	0	0	0	0	0	0	0
A0A069CYG3	NA	COG0779	poorly characterized	S : Function unknown	Uncharacterized protein conserved in bacteria	no hit	-	-	-	PF02576.13	Bacteria	Bacteroidetes	Bacteroidia	Bacteroidales	Bacteroidaceae	Bacteroides	Bacteroides graminisolvens	0	0.000272288	0	0	0.000432303	0.000345169	0	0	0.000523037	0.000591666	0.000783032	0.00059074	0.000428429	0.000405152	0	0
A0A069CYG8	NA	no hit	-	S : Function unknown	-	no hit	-	-	-	PF10988.4	Bacteria	Bacteroidetes	Bacteroidia	Bacteroidales	Bacteroidaceae	Bacteroides	Bacteroides graminisolvens	0	0.000214378	0.000191469	0	0	0.000205329	0	0	0.000591434	0.000752617	0.000597808	0.000720565	0.000133473	0.000344188	0.000350568	0.000513316
A0A069CYG9	NA	no hit	-	S : Function unknown	-	no hit	-	-	-	PF14322.2	Bacteria	Bacteroidetes	Bacteroidia	Bacteroidales	Bacteroidaceae	Bacteroides	Bacteroides graminisolvens	0	0	0	0	0	0	0.000140418	0	0.00381074	0.00187026	0.00135566	0.00131925	0.00313056	0.00209848	0.00152606	0.00165188
A0A069CYH1	NA	COG0445	cellular processes and signaling	D : Cell cycle control	NAD/FAD-utilizing enzyme apparently involved in cell division	no hit	-	-	-	PF13932.2	Bacteria	Bacteroidetes	Bacteroidia	Bacteroidales	Bacteroidaceae	Bacteroides	Bacteroides graminisolvens	0	0	0	0	0	0	0	0	0.000297268	0	0	0	0.000186291	0	0	0
A0A069CYH2	NA	COG1166	metabolism	E : Amino acid	Arginine decarboxylase (spermidine biosynthesis)	TIGR01273	Central intermediary metabolism	Polyamine biosynthesis	arginine decarboxylase	PF02784.12	Bacteria	Bacteroidetes	Bacteroidia	Bacteroidales	Bacteroidaceae	Bacteroides	Bacteroides graminisolvens	0.000165585	0.000266797	0.000474313	0.000218048	0.0001844	0.000339858	0.000376856	0.000295501	0.000277053	0.000222835	0.000374304	0.000466642	0.000287258	0.000160875	0.000163234	7.89e-05
A0A069CYH6	NA	COG0274	metabolism	F : Nucleotide	Deoxyribose-phosphate aldolase	TIGR00126	Purines, pyrimidines, nucleosides, and nucleotides	Other	deoxyribose-phosphate aldolase	PF01791.5	Bacteria	Bacteroidetes	Bacteroidia	Bacteroidales	Bacteroidaceae	Bacteroides	Bacteroides graminisolvens	0.000167942	0.000190364	0.000222646	0.00018243	0.000679126	0.000180679	0.000354422	0	0.000627452	0.00084857	0.000838104	0.000536405	0.00084047	0.000405269	0.000753358	0.00049717
A0A069CYI2	NA	COG0012	information storage and processing	J : Translation	Predicted GTPase, probable translation factor	TIGR00092	Unknown function	General	GTP-binding protein YchF	PF06071.9	Bacteria	Bacteroidetes	Bacteroidia	Bacteroidales	Bacteroidaceae	Bacteroides	Bacteroides graminisolvens	0.000245537	0.000114999	0.000227536	0.000218415	0.000316545	0.000219103	0.000171131	0.000149607	0.000222563	0.000215516	0.000193204	0.000169356	0.000121917	0.000170302	0.000169818	0.000133662
A0A069CYI3	NA	COG0330	cellular processes and signaling	O : Posttranslational modification	Membrane protease subunits, stomatin/prohibitin homologs	no hit	-	-	-	PF01145.21	Bacteria	Bacteroidetes	Bacteroidia	Bacteroidales	Bacteroidaceae	Bacteroides	Bacteroides graminisolvens	0.000331129	0.000235538	0.000446636	0.000505147	0	0.000297428	0.000444532	0.000496036	0.000600805	0.000414377	0.000467314	0.000463376	0.000424221	0.000298437	0.000441767	0.00054203
A0A069CYJ1	NA	COG0545	cellular processes and signaling	O : Posttranslational modification	FKBP-type peptidyl-prolyl cis-trans isomerases 1	no hit	-	-	-	PF00254.24	Bacteria	Bacteroidetes	Bacteroidia	Bacteroidales	Bacteroidaceae	Bacteroides	Bacteroides graminisolvens	0	0	0	0	0	0	0	0	0	0	0.000217677	0	0	0	0.000209595	0
A0A069CYJ4	NA	COG0793	cellular processes and signaling	M : Cell wall	Periplasmic protease	no hit	-	-	-	PF03572.14	Bacteria	Bacteroidetes	Bacteroidia	Bacteroidales	Bacteroidaceae	Bacteroides	Bacteroides graminisolvens	0	0	0	0	0	0	0	0	0	0	0	0.000254479	0	0	0	0
A0A069CYJ8	PL1	no hit	-	S : Function unknown	-	no hit	-	-	-	no hit	Bacteria	Bacteroidetes	Bacteroidia	Bacteroidales	Bacteroidaceae	Bacteroides	Bacteroides graminisolvens	0	0	0	0	0	0	0	0	9.16e-05	0	0	0	0	0	0	0
A0A069CYJ9	NA	no hit	-	S : Function unknown	-	no hit	-	-	-	PF03321.9	Bacteria	Bacteroidetes	Bacteroidia	Bacteroidales	Bacteroidaceae	Bacteroides	Bacteroides graminisolvens	8.49e-05	8.49e-05	9.65e-05	0.000194944	0	0	0	0	0	0	0	0	0	0	0	0
A0A069CYK2	NA	COG0379	metabolism	H : Coenzyme	Quinolinate synthase	TIGR00550	Biosynthesis of cofactors, prosthetic groups, and carriers	Pyridine nucleotides	quinolinate synthetase complex, A subunit	PF02445.12	Bacteria	Bacteroidetes	Bacteroidia	Bacteroidales	Bacteroidaceae	Bacteroides	Bacteroides graminisolvens	0	0	0	0	0.000250511	0.000324249	0.000275998	0.000174849	0.000194841	0.000171898	0.000129947	0.000193574	0.000103181	0.000117743	0.000234777	0.000202305
A0A069CYK9	NA	COG0002	metabolism	E : Amino acid	Acetylglutamate semialdehyde dehydrogenase	TIGR01850	Amino acid biosynthesis	Glutamate family	N-acetyl-gamma-glutamyl-phosphate reductase	PF01118.20	Bacteria	Bacteroidetes	Bacteroidia	Bacteroidales	Bacteroidaceae	Bacteroides	Bacteroides graminisolvens	0.000265395	0.000173766	0.000359865	0.000167699	0.000208096	0.000388061	0.000363816	0	0.000311878	0.000604669	0.000642038	0.000477756	0.000422607	0.000315695	0.000268305	0.000596741
A0A069CYL1	NA	COG1052	metabolism	C : Energy production and conversion	Lactate dehydrogenase and related dehydrogenases	no hit	-	-	-	PF02826.15	Bacteria	Bacteroidetes	Bacteroidia	Bacteroidales	Bacteroidaceae	Bacteroides	Bacteroides graminisolvens	0	0.000131561	0.000160583	0.00025207	0.000625285	0.000336255	0.000507638	0.000772397	0.000508192	0.000528919	0.000736948	0.00044725	0.000496063	0.000404681	0.000487273	0.000407093
A0A069CYL3	NA	COG0365	metabolism	I : Lipid	Acyl-coenzyme A synthetases/AMP-(fatty) acid ligases	no hit	-	-	-	PF00501.24	Bacteria	Bacteroidetes	Bacteroidia	Bacteroidales	Bacteroidaceae	Bacteroides	Bacteroides graminisolvens	0.000116216	7.64e-05	0.00013463	0	0.00012161	9.71e-05	0.000113984	0.000148538	0.000141868	0.000201948	0.000352335	0.00024916	0.000165774	9.74e-05	0.000134571	0
A0A069CYL4	NA	no hit	-	S : Function unknown	-	no hit	-	-	-	no hit	Bacteria	Bacteroidetes	Bacteroidia	Bacteroidales	Bacteroidaceae	Bacteroides	Bacteroides graminisolvens	0.000194308	0.000454588	0.000290221	0.000229943	0.000121037	0.000391604	0.000504859	0.000417808	0.00022601	0.000398343	0.000469402	0.000601526	0.000160237	0.000148834	0.000185811	0.000234772
A0A069CYL5	NA	COG1629	metabolism	P : Inorganic ion	Outer membrane receptor proteins, mostly Fe transport	no hit	-	-	-	PF00593.20	Bacteria	Bacteroidetes	Bacteroidia	Bacteroidales	Bacteroidaceae	Bacteroides	Bacteroides graminisolvens	0.000499636	9.42e-05	0.00403456	0.0043477	0.00174764	0.000931612	0.00129484	0.00125726	0.00307977	0.00110383	0.00132028	0.00168295	0.00278868	0.00108134	0.00113662	0.00116226
A0A069CYL7	NA	no hit	-	S : Function unknown	-	no hit	-	-	-	no hit	Bacteria	Bacteroidetes	Bacteroidia	Bacteroidales	Bacteroidaceae	Bacteroides	Bacteroides graminisolvens	0.000293079	9e-05	0.000144101	0.000170913	0.000142872	0	0	0	0	0	0	0	0	0	0	0
A0A069CYM0	NA	no hit	-	S : Function unknown	-	no hit	-	-	-	PF07980.7	Bacteria	Bacteroidetes	Bacteroidia	Bacteroidales	Bacteroidaceae	Bacteroides	Bacteroides graminisolvens	0.000830734	0.0003754	0.000287084	0.000357908	0.000537231	0.000272385	0	0.000150385	0	0	0	0	6.5e-05	0	0	0
A0A069CYM1	NA	COG3279	information storage and processing	K : Transcription	Response regulator of the LytR/AlgR family	no hit	-	-	-	PF04397.11	Bacteria	Bacteroidetes	Bacteroidia	Bacteroidales	Bacteroidaceae	Bacteroides	Bacteroides graminisolvens	0	0	0	0	0	0	0	0	0	0	0	0.000201313	0	0	0	0
A0A069CYM7	NA	COG3746	metabolism	P : Inorganic ion	Phosphate-selective porin	no hit	-	-	-	PF07396.7	Bacteria	Bacteroidetes	Bacteroidia	Bacteroidales	Bacteroidaceae	Bacteroides	Bacteroides graminisolvens	9.8e-05	0	0	0	0	0	0	0	0	0	0	0	0	0	0	0
A0A069CYM8	NA	no hit	-	S : Function unknown	-	no hit	-	-	-	PF13715.2	Bacteria	Bacteroidetes	Bacteroidia	Bacteroidales	Bacteroidaceae	Bacteroides	Bacteroides graminisolvens	0.00107653	0.000572919	0.00099454	0.00128307	0.00098886	0.000853606	0.00100882	0.000688552	0.000391585	0.000799474	0.000955222	0.000942997	7.72e-05	0.000443894	0.000578622	0.000428143
A0A069CYN0	NA	no hit	-	S : Function unknown	-	no hit	-	-	-	PF14125.2	Bacteria	Bacteroidetes	Bacteroidia	Bacteroidales	Bacteroidaceae	Bacteroides	Bacteroides graminisolvens	0	0.000258924	0	0	0.000411086	0	0	0	0	0	0	0	0	0	0	0
A0A069CYN4	GH43_29-CBM6	COG3507	metabolism	G : Carbohydrate	Beta-xylosidase	no hit	-	-	-	PF04616.10	Bacteria	Bacteroidetes	Bacteroidia	Bacteroidales	Bacteroidaceae	Bacteroides	Bacteroides graminisolvens	0	0.000124355	0.000107903	0.000217904	0.000148904	0.000118847	0	0	0.000272628	0.000224086	0.000253763	0.000203477	0.000222911	0	0.000119763	0
A0A069CYN5	NA	no hit	-	S : Function unknown	-	no hit	-	-	-	PF13444.2	Bacteria	Bacteroidetes	Bacteroidia	Bacteroidales	Bacteroidaceae	Bacteroides	Bacteroides graminisolvens	0.000193445	0.000127168	0.000146695	0	0	0	0	0	0	0.000194334	0	0	0	0	0	0
A0A069CYP0	GH97	no hit	-	S : Function unknown	-	no hit	-	-	-	PF10566.5	Bacteria	Bacteroidetes	Bacteroidia	Bacteroidales	Bacteroidaceae	Bacteroides	Bacteroides graminisolvens	6.6e-05	0	0.000101843	0	0	0	0	9.22e-05	0.000235207	6.11e-05	8.66e-05	0.000149159	8.85e-05	6.27e-05	0.000135273	0.000118944
A0A069CYP2	GT28	COG0707	cellular processes and signaling	M : Cell wall	UDP-N-acetylglucosamine:LPS N-acetylglucosamine transferase	TIGR01133	Cell envelope	Biosynthesis and degradation of murein sacculus and peptidoglycan	undecaprenyldiphospho-muramoylpentapeptide beta-N-acetylglucosaminyltransferase	PF04101.12	Bacteria	Bacteroidetes	Bacteroidia	Bacteroidales	Bacteroidaceae	Bacteroides	Bacteroides graminisolvens	0.000126583	0.000112847	0.000180685	0.000177786	0	0	0	0	0.000119309	0.000105757	0.000149857	0.000166187	0.000119619	0.000103886	0.000133555	0.000131161
A0A069CYP3	NA	COG0327	poorly characterized	S : Function unknown	Uncharacterized conserved protein	TIGR00486	Unknown function	General	dinuclear metal center protein, YbgI/SA1388 family	PF01784.14	Bacteria	Bacteroidetes	Bacteroidia	Bacteroidales	Bacteroidaceae	Bacteroides	Bacteroides graminisolvens	0	0.000114934	0.000138182	0	0	0	0	0	0.000145479	0.000102095	0.000165713	0	0.000122913	0.000147378	0.000113434	0.000129179
A0A069CYP5	NA	COG0206	cellular processes and signaling	D : Cell cycle control	Cell division GTPase	no hit	-	-	-	PF00091.21	Bacteria	Bacteroidetes	Bacteroidia	Bacteroidales	Bacteroidaceae	Bacteroides	Bacteroides graminisolvens	0	0.000657452	0	0	0.00103505	0	0.000783468	0	0.000587405	0	0.000425859	0.000845374	0.0003667	0	0.000796843	0
A0A069CYP9	NA	COG0187	information storage and processing	L : Replication	Type IIA topoisomerase (DNA gyrase/topo II, topoisomerase IV), B subunit	TIGR01059	DNA metabolism	DNA replication, recombination, and repair	DNA gyrase, B subunit	PF00204.21	Bacteria	Bacteroidetes	Bacteroidia	Bacteroidales	Bacteroidaceae	Bacteroides	Bacteroides graminisolvens	0.000138079	0.000172501	0.000128844	0.000122953	0.000126792	0.00013673	0.000107883	9.14e-05	0.000259458	0.000265274	0.000235331	0.000195949	0.000250055	0.00017404	0.000182554	0.000176937
A0A069CYQ0	NA	COG0442	information storage and processing	J : Translation	Prolyl-tRNA synthetase	TIGR00408	Protein synthesis	tRNA aminoacylation	proline--tRNA ligase	PF09180.7	Bacteria	Bacteroidetes	Bacteroidia	Bacteroidales	Bacteroidaceae	Bacteroides	Bacteroides graminisolvens	8.67e-05	0.000126665	0	0	0.000135917	0.000180842	0.000127393	0	7.34e-05	0.000127843	0	0.000139128	9.11e-05	0.000144794	0	0
A0A069CYQ2	NA	COG3808	metabolism	C : Energy production and conversion	Inorganic pyrophosphatase	no hit	-	-	-	PF03030.12	Bacteria	Bacteroidetes	Bacteroidia	Bacteroidales	Bacteroidaceae	Bacteroides	Bacteroides graminisolvens	0	0	0	0	0	0	0	0	0.000266039	0	0	0.000171708	0.000177533	0	0	0.000172873
A0A069CYQ3	NA	COG0527	metabolism	E : Amino acid	Aspartokinases	TIGR00657	Amino acid biosynthesis	Aspartate family	aspartate kinase	PF00742.15	Bacteria	Bacteroidetes	Bacteroidia	Bacteroidales	Bacteroidaceae	Bacteroides	Bacteroides graminisolvens	0.000239838	0.000277851	0.000305404	0.000206983	8.26e-05	0.000175992	0.000193225	0.000102178	0.000217386	0.000111479	0.000124262	0.000111774	0.000134752	4.79e-05	0.000126804	0
A0A069CYQ6	NA	COG0074	metabolism	C : Energy production and conversion	Succinyl-CoA synthetase, alpha subunit	no hit	-	-	-	PF02629.15	Bacteria	Bacteroidetes	Bacteroidia	Bacteroidales	Bacteroidaceae	Bacteroides	Bacteroides graminisolvens	0.000806606	0.000857266	0.000364653	0.000733026	0.00144399	0.00062281	0.000980083	0.000251965	0.000853122	0.000793289	0.000926089	0.00118703	0.000446183	0.000758633	0.000556445	0.000719951
A0A069CYR0	NA	COG0393	poorly characterized	S : Function unknown	Uncharacterized conserved protein	no hit	-	-	-	PF01906.13	Bacteria	Bacteroidetes	Bacteroidia	Bacteroidales	Bacteroidaceae	Bacteroides	Bacteroides graminisolvens	0	0	0	0	0	0.000505574	0	0.000562369	0	0.0010703	0.000770227	0.00129741	0	0.001188	0.000942445	0.000921263
A0A069CYR4	NA	COG0719	cellular processes and signaling	O : Posttranslational modification	ABC-type transport system involved in Fe-S cluster assembly, permease component	TIGR01980	Biosynthesis of cofactors, prosthetic groups, and carriers	Other	FeS assembly protein SufB	PF01458.13	Bacteria	Bacteroidetes	Bacteroidia	Bacteroidales	Bacteroidaceae	Bacteroides	Bacteroides graminisolvens	0	0.000172877	0	0	0.000138444	0.000147263	0	0.00012104	0.000165133	0.000208347	0.000203232	0.000263241	0.00011517	0.000129072	0	0
A0A069CYR8	CE1	COG2382	metabolism	P : Inorganic ion	Enterochelin esterase and related enzymes	no hit	-	-	-	PF00756.16	Bacteria	Bacteroidetes	Bacteroidia	Bacteroidales	Bacteroidaceae	Bacteroides	Bacteroides graminisolvens	0.000237956	0.000144853	0.000256933	0.000341861	0.000677806	0.000504449	0	0.000492916	0.000391483	0.000761859	0.000836241	0.000361796	0.00042378	0.000529036	0.000561458	0.000491626
A0A069CYT2	NA	COG0682	cellular processes and signaling	M : Cell wall	Prolipoprotein diacylglyceryltransferase	TIGR00544	Protein fate	Protein modification and repair	prolipoprotein diacylglyceryl transferase	PF01790.14	Bacteria	Bacteroidetes	Bacteroidia	Bacteroidales	Bacteroidaceae	Bacteroides	Bacteroides graminisolvens	0.000174599	0	0	0	0.00023594	0	0	0	0.000195736	0.000263985	0.000150994	0	0.000119924	0	0	0
A0A069CYT3	NA	COG0075	metabolism	E : Amino acid	Serine-pyruvate aminotransferase/archaeal aspartate aminotransferase	no hit	-	-	-	PF00266.15	Bacteria	Bacteroidetes	Bacteroidia	Bacteroidales	Bacteroidaceae	Bacteroides	Bacteroides graminisolvens	0	0	0	0	0	0	0	0	0.000104285	0	0	0	0	0	0	0
A0A069CYT7	NA	COG0562	cellular processes and signaling	M : Cell wall	UDP-galactopyranose mutase	TIGR00031	Cell envelope	Biosynthesis and degradation of surface polysaccharides and lipopolysaccharides	UDP-galactopyranose mutase	PF03275.9	Bacteria	Bacteroidetes	Bacteroidia	Bacteroidales	Bacteroidaceae	Bacteroides	Bacteroides graminisolvens	0	0	0	0.000151683	0	0	0	0	0	0	0	0	0.000156101	0.00011391	0	0
A0A069CYT8	NA	COG2262	poorly characterized	R : General function prediction only	GTPases	TIGR03156	Unknown function	General	GTP-binding protein HflX	PF13167.2	Bacteria	Bacteroidetes	Bacteroidia	Bacteroidales	Bacteroidaceae	Bacteroides	Bacteroides graminisolvens	0	0.000102856	0	0	0	0	0	0	0	0.000100503	0.000158799	0	8.21e-05	0.000139349	9.95e-05	0
A0A069CYU0	NA	COG0236	metabolism	I : Lipid	Acyl carrier protein	TIGR00517	Fatty acid and phospholipid metabolism	Biosynthesis	acyl carrier protein	PF00550.21	Bacteria	Bacteroidetes	Bacteroidia	Bacteroidales	Bacteroidaceae	Bacteroides	Bacteroides graminisolvens	0.0012139	0.00125843	0.00128137	0.00170492	0.00338035	0.00251484	0.00226831	0.0014707	0.00131002	0.00116451	0.00128181	0.00142575	0.000873299	0.00114783	0.000993285	0.0012578
A0A069CYU1	NA	COG0233	information storage and processing	J : Translation	Ribosome recycling factor	TIGR00496	Protein synthesis	Translation factors	ribosome recycling factor	PF01765.15	Bacteria	Bacteroidetes	Bacteroidia	Bacteroidales	Bacteroidaceae	Bacteroides	Bacteroides graminisolvens	0.00117081	0.0017453	0.00159681	0.001425	0.00108076	0.000958482	0.00135978	0.00091378	0.000840517	0.00182016	0.0020363	0.00168871	0.000471019	0.00152585	0.00140039	0.00113071
A0A069CYU7	NA	no hit	-	S : Function unknown	-	no hit	-	-	-	PF16738.1	Bacteria	Bacteroidetes	Bacteroidia	Bacteroidales	Bacteroidaceae	Bacteroides	Bacteroides graminisolvens	0.000205495	0.000191494	0.000179985	0.000180195	0.000181591	0.00014499	0.000190649	0	0.000188527	0	0	0	0.000121678	0	0	0
A0A069CYU9	NA	no hit	-	S : Function unknown	-	no hit	-	-	-	PF14254.2	Bacteria	Bacteroidetes	Bacteroidia	Bacteroidales	Bacteroidaceae	Bacteroides	Bacteroides graminisolvens	0.000260267	0.000366992	0	0	0	0.00028058	0	0	0	0.000436808	0.000360216	0	0.000178318	0	0	0
A0A069CYV3	NA	COG0778	metabolism	C : Energy production and conversion	Nitroreductase	no hit	-	-	-	PF00881.20	Bacteria	Bacteroidetes	Bacteroidia	Bacteroidales	Bacteroidaceae	Bacteroides	Bacteroides graminisolvens	0	0	0	0	0.000635138	0	0.000595308	0.000458557	0	0	0	0	0.000152939	0.000256392	0	0.000238915
A0A069CYV6	NA	no hit	-	S : Function unknown	-	no hit	-	-	-	no hit	Bacteria	Bacteroidetes	Bacteroidia	Bacteroidales	Bacteroidaceae	Bacteroides	Bacteroides graminisolvens	0	0	0	0	0	0.000972748	0	0	0	0	0	0	0	0	0	0
A0A069CYW0	NA	no hit	-	S : Function unknown	-	no hit	-	-	-	PF07980.7	Bacteria	Bacteroidetes	Bacteroidia	Bacteroidales	Bacteroidaceae	Bacteroides	Bacteroides graminisolvens	0	8.24e-05	0	0	0	0	0	0	0	0	0	0	0	0	0	0
A0A069CYW8	GH43_29-CBM6	COG3507	metabolism	G : Carbohydrate	Beta-xylosidase	no hit	-	-	-	PF04616.10	Bacteria	Bacteroidetes	Bacteroidia	Bacteroidales	Bacteroidaceae	Bacteroides	Bacteroides graminisolvens	0.000279593	0.000129926	0.000158589	0	0	0	0	0	0.00047294	0.000631786	0.000298943	0.000350556	0.000350482	0	0	0
A0A069CYX6	NA	COG1475	information storage and processing	K : Transcription	Predicted transcriptional regulators	TIGR00180	-	-	ParB/RepB/Spo0J family partition protein	PF02195.14	Bacteria	Bacteroidetes	Bacteroidia	Bacteroidales	Bacteroidaceae	Bacteroides	Bacteroides graminisolvens	0.0003049	0.000191009	0.0002234	0.000249421	0	0.00042297	0.000318305	0.000198588	0.000122648	0.000209883	0.000290728	0.00024943	0.000267107	0.000232812	0.000169321	0.000170885
A0A069CYX7	NA	COG0543	metabolism	H : Coenzyme	2-polyprenylphenol hydroxylase and related flavodoxin oxidoreductases	no hit	-	-	-	PF10418.5	Bacteria	Bacteroidetes	Bacteroidia	Bacteroidales	Bacteroidaceae	Bacteroides	Bacteroides graminisolvens	0	0.000243079	0	0	0	0	0	0	0.000345902	0.00024932	0.000328042	0.000367816	0	0.000150602	0.000241563	0.000251763
A0A069CYX9	NA	COG2365	cellular processes and signaling	T : Signal transduction	Protein tyrosine/serine phosphatase	no hit	-	-	-	PF13350.2	Bacteria	Bacteroidetes	Bacteroidia	Bacteroidales	Bacteroidaceae	Bacteroides	Bacteroides graminisolvens	0.000369464	0.000481856	0.000516667	0.000757077	0	0.00027764	0.000195654	0.000171046	0.000225428	0.000360152	0.000507652	0	0.000273894	0.0003923	0.000451413	0.000220787
A0A069CYY0	NA	COG0465	cellular processes and signaling	O : Posttranslational modification	ATP-dependent Zn proteases	TIGR01241	Cellular processes	Cell division	ATP-dependent metallopeptidase HflB	PF01434.14	Bacteria	Bacteroidetes	Bacteroidia	Bacteroidales	Bacteroidaceae	Bacteroides	Bacteroides graminisolvens	0.000348033	0.000252845	0.000200886	0.000151988	0.00010046	0.00018702	0.000253025	8.65e-05	0.000278931	0.00017528	0.00018547	0.000191542	0.000134601	0.000273547	0.000177673	0.000123257
A0A069CYY2	NA	COG0045	metabolism	C : Energy production and conversion	Succinyl-CoA synthetase, beta subunit	TIGR01016	Energy metabolism	TCA cycle	succinate-CoA ligase, beta subunit	PF08442.6	Bacteria	Bacteroidetes	Bacteroidia	Bacteroidales	Bacteroidaceae	Bacteroides	Bacteroides graminisolvens	0.000474275	0.000628132	0.000915795	0.000886438	0.000828983	0.000469796	0.000611023	0.000543597	0.000782171	0.000880692	0.000988208	0.000938762	0.000627805	0.000684803	0.000955663	0.00097542
A0A069CYY3	NA	COG1004	cellular processes and signaling	M : Cell wall	Predicted UDP-glucose 6-dehydrogenase	TIGR03026	-	-	nucleotide sugar dehydrogenase	PF03721.10	Bacteria	Bacteroidetes	Bacteroidia	Bacteroidales	Bacteroidaceae	Bacteroides	Bacteroides graminisolvens	0.000454332	0.000481398	0.000418841	0.00039838	0.000642715	0.000529175	0.000400067	0.000306038	0.000644067	0.000498122	0.000510729	0.000650249	0.000356604	0.000435806	0.000498647	0.000256172
A0A069CYY5	NA	COG2957	metabolism	E : Amino acid	Peptidylarginine deiminase and related enzymes	no hit	-	-	-	PF04371.11	Bacteria	Bacteroidetes	Bacteroidia	Bacteroidales	Bacteroidaceae	Bacteroides	Bacteroides graminisolvens	0	0	0	0	0	0	0	0.000538291	0	0	0	0	0	0	0	0
A0A069CYZ5	NA	COG2373	poorly characterized	R : General function prediction only	Large extracellular alpha-helical protein	no hit	-	-	-	PF00207.18	Bacteria	Bacteroidetes	Bacteroidia	Bacteroidales	Bacteroidaceae	Bacteroides	Bacteroides graminisolvens	3.53e-05	3.15e-05	5.04e-05	7.23e-05	0	3.98e-05	0	0	7.61e-05	3.92e-05	3.15e-05	7.07e-05	3.33e-05	0	3.07e-05	0
A0A069CYZ6	NA	COG2265	information storage and processing	J : Translation	SAM-dependent methyltransferases related to tRNA (uracil-5-)-methyltransferase	TIGR00479	Protein synthesis	tRNA and rRNA base modification	23S rRNA (uracil-5-)-methyltransferase RumA	PF05958.7	Bacteria	Bacteroidetes	Bacteroidia	Bacteroidales	Bacteroidaceae	Bacteroides	Bacteroides graminisolvens	0	0	0	0	0	0	0	0	0	7.38e-05	8.4e-05	9.23e-05	6.96e-05	0	0.00016385	0.000186593
A0A069CZ02	NA	COG0024	information storage and processing	J : Translation	Methionine aminopeptidase	TIGR00500	Protein fate	Protein modification and repair	methionine aminopeptidase, type I	PF00557.20	Bacteria	Bacteroidetes	Bacteroidia	Bacteroidales	Bacteroidaceae	Bacteroides	Bacteroides graminisolvens	0	0	0	0	0	0	0	0	0	0.000322653	0.000275541	0.000253474	0	0	0	0
A0A069CZ05	NA	COG0667	metabolism	C : Energy production and conversion	Predicted oxidoreductases (related to aryl-alcohol dehydrogenases)	no hit	-	-	-	PF00248.17	Bacteria	Bacteroidetes	Bacteroidia	Bacteroidales	Bacteroidaceae	Bacteroides	Bacteroides graminisolvens	0.000532168	0.000511406	0.000657553	0.000623049	0.000251272	0.000325657	0.000530119	0.000573275	0.000587501	0.000676332	0.000672059	0.000576516	0.000485149	0.000400548	0.000776198	0.00049974
A0A069CZ06	NA	COG0127	metabolism	F : Nucleotide	Xanthosine triphosphate pyrophosphatase	TIGR00042	DNA metabolism	DNA replication, recombination, and repair	non-canonical purine NTP pyrophosphatase, RdgB/HAM1 family	PF01725.12	Bacteria	Bacteroidetes	Bacteroidia	Bacteroidales	Bacteroidaceae	Bacteroides	Bacteroides graminisolvens	0	0	0	0	0	0	0	0	0	0	0.000216578	0	0	0	0.000208536	0.000251161
A0A069CZ09	NA	no hit	-	S : Function unknown	-	no hit	-	-	-	PF14322.2	Bacteria	Bacteroidetes	Bacteroidia	Bacteroidales	Bacteroidaceae	Bacteroides	Bacteroides graminisolvens	0	0	0	0	0.000229084	0.000822913	0.000645655	0.000589452	0	0	0	0	0	0	0	0
A0A069CZ19	NA	no hit	-	S : Function unknown	-	no hit	-	-	-	PF07980.7	Bacteria	Bacteroidetes	Bacteroidia	Bacteroidales	Bacteroidaceae	Bacteroides	Bacteroides graminisolvens	0.000593156	0.00101011	0.00113158	0.000909572	0.000304488	0.00111643	0.000932315	0.000800949	0.000598465	0.00117016	0.00137751	0.00121995	0.000458729	0.000874756	0.000879539	0.00102883
A0A069CZ20	GH13	COG0366	metabolism	G : Carbohydrate	Glycosidases	no hit	-	-	-	PF00128.20	Bacteria	Bacteroidetes	Bacteroidia	Bacteroidales	Bacteroidaceae	Bacteroides	Bacteroides graminisolvens	0.000229295	0.000200189	0	0	0.00057271	0	0	0	0.000296425	0	0	0.000139927	0.000321524	0	0	0.000185057
A0A069CZ26	GH97	COG0383	metabolism	G : Carbohydrate	Alpha-mannosidase	no hit	-	-	-	PF10566.5	Bacteria	Bacteroidetes	Bacteroidia	Bacteroidales	Bacteroidaceae	Bacteroides	Bacteroides graminisolvens	9.92e-05	6.31e-05	7.65e-05	0	0.00010046	0	0	0	8.34e-05	0	0	0	8.33e-05	0	0	0
A0A069CZ36	NA	COG0505	metabolism	E : Amino acid	Carbamoylphosphate synthase small subunit	TIGR01368	Purines, pyrimidines, nucleosides, and nucleotides	Pyrimidine ribonucleotide biosynthesis	carbamoyl-phosphate synthase, small subunit	PF00988.18	Bacteria	Bacteroidetes	Bacteroidia	Bacteroidales	Bacteroidaceae	Bacteroides	Bacteroides graminisolvens	0	0.000116911	0	0	0	0	0	0	0.000100208	0.000102944	0.000112069	0	0	0	0	0
A0A069CZ45	NA	COG1579	poorly characterized	R : General function prediction only	Zn-ribbon protein, possibly nucleic acid-binding	no hit	-	-	-	PF02591.11	Bacteria	Bacteroidetes	Bacteroidia	Bacteroidales	Bacteroidaceae	Bacteroides	Bacteroides graminisolvens	0.000592084	0.00053317	0.000692958	0.000896202	0	0.000404556	0.000580565	0.000573176	0.000591774	0.000726024	0.000905476	0.000898642	0.000983974	0.000610993	0.000502008	0.000543753
A0A069CZ49	GH2	COG3250	metabolism	G : Carbohydrate	Beta-galactosidase/beta-glucuronidase	no hit	-	-	-	PF02836.13	Bacteria	Bacteroidetes	Bacteroidia	Bacteroidales	Bacteroidaceae	Bacteroides	Bacteroides graminisolvens	0.000445329	0.000395805	0.000562954	0.000685186	0.000320732	0.000518648	0.000393576	0.000447721	0.000569658	0.000573312	0.000524798	0.00074882	0.000415472	0.000446247	0.000448626	0.000603986
A0A069CZ51	NA	COG0388	poorly characterized	R : General function prediction only	Predicted amidohydrolase	no hit	-	-	-	PF00795.18	Bacteria	Bacteroidetes	Bacteroidia	Bacteroidales	Bacteroidaceae	Bacteroides	Bacteroides graminisolvens	0.000644392	0.000212442	0.000284033	0.000348611	0	0	0	0	0.000161646	0.000308951	0.000332914	0.00037826	0	0.000385967	0.000311219	0.000273475
A0A069CZ52	NA	COG0787	cellular processes and signaling	M : Cell wall	Alanine racemase	TIGR00492	Cell envelope	Biosynthesis and degradation of murein sacculus and peptidoglycan	alanine racemase	PF00842.17	Bacteria	Bacteroidetes	Bacteroidia	Bacteroidales	Bacteroidaceae	Bacteroides	Bacteroides graminisolvens	0	0	0	0	0	0	0	0	0	0	0.000153568	0	0	0	0	0
A0A069CZ55	NA	COG0451	cellular processes and signaling	M : Cell wall	Nucleoside-diphosphate-sugar epimerases	no hit	-	-	-	PF16363.1	Bacteria	Bacteroidetes	Bacteroidia	Bacteroidales	Bacteroidaceae	Bacteroides	Bacteroides graminisolvens	0	0	0.000419153	0	0	0.000445843	0	0	0.00030151	0	0	0	0	0	0	0
A0A069CZ58	GH105	COG4225	poorly characterized	R : General function prediction only	Predicted unsaturated glucuronyl hydrolase involved in regulation of bacterial surface properties, and related proteins	no hit	-	-	-	PF07470.9	Bacteria	Bacteroidetes	Bacteroidia	Bacteroidales	Bacteroidaceae	Bacteroides	Bacteroides graminisolvens	0	0	0.000265816	0	0	0	0	0	0	0.000211492	0	0	0	0	0	0.000268144
A0A069CZ59	NA	COG0605	metabolism	P : Inorganic ion	Superoxide dismutase	no hit	-	-	-	PF02777.14	Bacteria	Bacteroidetes	Bacteroidia	Bacteroidales	Bacteroidaceae	Bacteroides	Bacteroides graminisolvens	0	0	0.000478475	0.000263411	0.000643092	0.00139109	0.00157692	0.00230537	0.000272212	0.00130157	0.00136775	0.00170092	0.000716652	0.0020577	0.00277604	0.00383082
A0A069CZ66	NA	COG0134	metabolism	E : Amino acid	Indole-3-glycerol phosphate synthase	no hit	-	-	-	PF00218.17	Bacteria	Bacteroidetes	Bacteroidia	Bacteroidales	Bacteroidaceae	Bacteroides	Bacteroides graminisolvens	0	0	0	0	0	0	0	0	0.00021299	0	0	0	0.000177877	0	0	0
A0A069CZ82	NA	COG0481	cellular processes and signaling	M : Cell wall	Membrane GTPase LepA	TIGR01393	Unknown function	General	elongation factor 4	PF00009.23	Bacteria	Bacteroidetes	Bacteroidia	Bacteroidales	Bacteroidaceae	Bacteroides	Bacteroides graminisolvens	0.000180032	0	0	0	0	0	0	0	7.53e-05	6.27e-05	0	7.88e-05	5.74e-05	0	0	0
A0A069CZ84	NA	COG0783	metabolism	P : Inorganic ion	DNA-binding ferritin-like protein (oxidative damage protectant)	no hit	-	-	-	PF00210.20	Bacteria	Bacteroidetes	Bacteroidia	Bacteroidales	Bacteroidaceae	Bacteroides	Bacteroides graminisolvens	0	0	0	0	0.00125848	0.0011288	0.00044525	0.00109557	0	0	0	0.0002956	0	0.000679058	0.00026133	0.000408233
A0A069CZ88	NA	COG0217	poorly characterized	S : Function unknown	Uncharacterized conserved protein	TIGR01033	Regulatory functions	DNA interactions	DNA-binding regulatory protein, YebC/PmpR family	PF01709.16	Bacteria	Bacteroidetes	Bacteroidia	Bacteroidales	Bacteroidaceae	Bacteroides	Bacteroides graminisolvens	0.000701694	0.000636526	0.000815723	0.000820891	0.000827249	0.000587364	0.000751313	0.000712345	0.000596898	0.000658101	0.000766394	0.000652908	0.000368851	0.000431051	0.000637666	0.000347601
A0A069CZ95	NA	COG3717	metabolism	G : Carbohydrate	5-keto 4-deoxyuronate isomerase	no hit	-	-	-	PF04962.8	Bacteria	Bacteroidetes	Bacteroidia	Bacteroidales	Bacteroidaceae	Bacteroides	Bacteroides graminisolvens	0.00197936	0.00195748	0.00236928	0.0023871	0.000654211	0.00120982	0.00132881	0.00131422	0.00203766	0.00231564	0.00253865	0.00219807	0.00166479	0.00148209	0.00201238	0.00184936
A0A069CZA2	NA	COG0504	metabolism	F : Nucleotide	CTP synthase (UTP-ammonia lyase)	TIGR00337	Purines, pyrimidines, nucleosides, and nucleotides	Pyrimidine ribonucleotide biosynthesis	CTP synthase	PF06418.10	Bacteria	Bacteroidetes	Bacteroidia	Bacteroidales	Bacteroidaceae	Bacteroides	Bacteroides graminisolvens	8.88e-05	0.000104976	0.000188477	0.000202624	0.000343676	0.000267586	0.000511873	0.00041205	0.000457049	0.000652247	0.000478489	0.000616897	0.000484162	0.000257709	0.000145359	0.000335767
A0A069CZA6	NA	COG0513	information storage and processing	L : Replication	Superfamily II DNA and RNA helicases	no hit	-	-	-	PF00270.25	Bacteria	Bacteroidetes	Bacteroidia	Bacteroidales	Bacteroidaceae	Bacteroides	Bacteroides graminisolvens	0.000104471	0	0	0	0	0	0	0	0	0.000138718	0.000168209	0	0	0.000123901	0	0
A0A069CZA8	NA	COG1506	metabolism	E : Amino acid	Dipeptidyl aminopeptidases/acylaminoacyl-peptidases	no hit	-	-	-	PF00930.17	Bacteria	Bacteroidetes	Bacteroidia	Bacteroidales	Bacteroidaceae	Bacteroides	Bacteroides graminisolvens	0	0	0	0	0	0	0	0	0	5.47e-05	5.9e-05	0	0	0	0	0
A0A069CZB2	NA	COG3706	cellular processes and signaling	T : Signal transduction	Response regulator containing a CheY-like receiver domain and a GGDEF domain	no hit	-	-	-	PF00072.20	Bacteria	Bacteroidetes	Bacteroidia	Bacteroidales	Bacteroidaceae	Bacteroides	Bacteroides graminisolvens	0.000186386	0.00016616	0.000196746	0.000212595	0.000387126	0	0	0	0.000563709	0.000271996	0.000556394	0.000431504	0.000310222	0.000211683	0.000393304	0.000386252
A0A069CZB3	NA	COG0557	information storage and processing	K : Transcription	Exoribonuclease R	TIGR02063	Transcription	Degradation of RNA	ribonuclease R	PF00773.15	Bacteria	Bacteroidetes	Bacteroidia	Bacteroidales	Bacteroidaceae	Bacteroides	Bacteroides graminisolvens	0.000231437	0.000156074	0.00011554	0.000246212	0.000115298	0.00012419	9.81e-05	0.000156871	0.000269578	0.000349721	0.000291486	0.000367086	0.000172726	0.000171287	0.000116242	0.000159008
A0A069CZC1	NA	COG0451	cellular processes and signaling	M : Cell wall	Nucleoside-diphosphate-sugar epimerases	no hit	-	-	-	PF16363.1	Bacteria	Bacteroidetes	Bacteroidia	Bacteroidales	Bacteroidaceae	Bacteroides	Bacteroides graminisolvens	0	0	0	0	0.000376444	0	0	0	0	0.000234355	0	0.000275923	0	0	0.000359391	0.000275585
A0A069CZC3	NA	COG1053	metabolism	C : Energy production and conversion	Succinate dehydrogenase/fumarate reductase, flavoprotein subunit	no hit	-	-	-	PF02910.16	Bacteria	Bacteroidetes	Bacteroidia	Bacteroidales	Bacteroidaceae	Bacteroides	Bacteroides graminisolvens	0.00145668	0.000860809	0.00153764	0.00129125	0.00127183	0.00164669	0.00140122	0.00177539	0.00146228	0.000835647	0.00130208	0.00145995	0.00104796	0.000966131	0.00119194	0.000992318
A0A069CZC4	NA	COG0584	metabolism	C : Energy production and conversion	Glycerophosphoryl diester phosphodiesterase	no hit	-	-	-	PF03009.13	Bacteria	Bacteroidetes	Bacteroidia	Bacteroidales	Bacteroidaceae	Bacteroides	Bacteroides graminisolvens	0	0	0	0	0.000263807	0	0	0	0	0.000155698	0.000166604	0	0.000134089	0.00015787	0	0
A0A069CZC5	NA	COG0642	cellular processes and signaling	T : Signal transduction	Signal transduction histidine kinase	no hit	-	-	-	PF02518.22	Bacteria	Bacteroidetes	Bacteroidia	Bacteroidales	Bacteroidaceae	Bacteroides	Bacteroides graminisolvens	0	0	7.28e-05	0	0	0	0	0	0	0	0	0	0	0	0	0
A0A069CZD2	NA	COG0657	metabolism	I : Lipid	Esterase/lipase	no hit	-	-	-	PF07859.9	Bacteria	Bacteroidetes	Bacteroidia	Bacteroidales	Bacteroidaceae	Bacteroides	Bacteroides graminisolvens	0	0	0	0	0	0	0.000350866	0	0	0.00078428	0.000859908	0.000959529	0.000260357	0.000703511	0.000935687	0.000636922
A0A069CZD4	NA	COG0574	metabolism	G : Carbohydrate	Phosphoenolpyruvate synthase/pyruvate phosphate dikinase	TIGR01828	Energy metabolism	Other	pyruvate, phosphate dikinase	PF02896.14	Bacteria	Bacteroidetes	Bacteroidia	Bacteroidales	Bacteroidaceae	Bacteroides	Bacteroides graminisolvens	0.000851826	0.000821891	0.000902526	0.000795588	0.00082121	0.000708544	0.000690283	0.000338255	0.000758861	0.000605787	0.00075319	0.000814616	0.000587288	0.000553447	0.000669212	0.00065421
A0A069CZD6	NA	COG1979	metabolism	C : Energy production and conversion	Uncharacterized oxidoreductases, Fe-dependent alcohol dehydrogenase family	no hit	-	-	-	PF00465.15	Bacteria	Bacteroidetes	Bacteroidia	Bacteroidales	Bacteroidaceae	Bacteroides	Bacteroides graminisolvens	0.000591394	0.00052332	0.000925434	0.000782332	0	0.000743411	0.000517636	0.000433419	0.00037002	0.000792727	0.000916009	0.000878119	0.000414239	0.000719543	0.000737425	0.001064
A0A069CZE1	NA	COG0512	metabolism	E : Amino acid	Anthranilate/para-aminobenzoate synthases component II	TIGR00566	-	-	glutamine amidotransferase of anthranilate synthase or aminodeoxychorismate synthase	PF00117.24	Bacteria	Bacteroidetes	Bacteroidia	Bacteroidales	Bacteroidaceae	Bacteroides	Bacteroides graminisolvens	0	0	0	0	0	0	0	0	0	0	0	0	0.000296422	0	0	0
A0A069CZE8	NA	COG0072	information storage and processing	J : Translation	Phenylalanyl-tRNA synthetase beta subunit	TIGR00472	Protein synthesis	tRNA aminoacylation	phenylalanine--tRNA ligase, beta subunit	PF03483.13	Bacteria	Bacteroidetes	Bacteroidia	Bacteroidales	Bacteroidaceae	Bacteroides	Bacteroides graminisolvens	0.000196299	0.000411961	0.000324143	0.0003297	0.000245148	0.000174061	0.000196359	0.000182365	0.000278638	0.000323284	0.000323816	0.000191524	0.00022506	0.000174391	0.000165642	0.000236532
A0A069CZF0	NA	COG0588	metabolism	G : Carbohydrate	Phosphoglycerate mutase 1	TIGR01258	-	-	phosphoglycerate mutase 1 family	PF00300.18	Bacteria	Bacteroidetes	Bacteroidia	Bacteroidales	Bacteroidaceae	Bacteroides	Bacteroides graminisolvens	0.00107572	0.000981532	0.000654674	0.000976171	0.000868302	0.00116815	0.00165117	0.00193431	0.000625719	0.000979229	0.000919707	0.00117897	0.000540806	0.000704632	0.000449073	0.000557423
A0A069CZF6	NA	COG1778	poorly characterized	R : General function prediction only	Low specificity phosphatase (HAD superfamily)	TIGR01670	Cell envelope	Biosynthesis and degradation of surface polysaccharides and lipopolysaccharides	3-deoxy-D-manno-octulosonate 8-phosphate phosphatase, YrbI family	PF08282.8	Bacteria	Bacteroidetes	Bacteroidia	Bacteroidales	Bacteroidaceae	Bacteroides	Bacteroides graminisolvens	0	0	0	0	0	0	0	0	0.000217959	0.000238236	0.000243715	0.000280276	0.000194399	0.000216354	0.000248736	0
A0A069CZG0	NA	COG0491	poorly characterized	R : General function prediction only	Zn-dependent hydrolases, including glyoxylases	no hit	-	-	-	PF00753.23	Bacteria	Bacteroidetes	Bacteroidia	Bacteroidales	Bacteroidaceae	Bacteroides	Bacteroides graminisolvens	0	0	0	0	0	0	0	0	0	0	0	0.000218286	0	0	0	0
A0A069CZG4	NA	COG4659	metabolism	C : Energy production and conversion	Predicted NADH:ubiquinone oxidoreductase, subunit RnfG	TIGR01947	Energy metabolism	Electron transport	electron transport complex, RnfABCDGE type, G subunit	PF04205.10	Bacteria	Bacteroidetes	Bacteroidia	Bacteroidales	Bacteroidaceae	Bacteroides	Bacteroides graminisolvens	0	0	0.000228189	0	0.000305968	0.000244298	0.000428767	0.000250711	0	0.000282719	0.000184734	0	0.000159071	0.000163994	0.00018854	0
A0A069CZG6	GH2	COG3250	metabolism	G : Carbohydrate	Beta-galactosidase/beta-glucuronidase	no hit	-	-	-	PF02837.14	Bacteria	Bacteroidetes	Bacteroidia	Bacteroidales	Bacteroidaceae	Bacteroides	Bacteroides graminisolvens	0	0	0	0	0	7.51e-05	0	0	5.08e-05	0	0	0	4.78e-05	0	0	0
A0A069CZG7	NA	COG0458	metabolism	E : Amino acid	Carbamoylphosphate synthase large subunit (split gene in MJ)	TIGR01369	Purines, pyrimidines, nucleosides, and nucleotides	Pyrimidine ribonucleotide biosynthesis	carbamoyl-phosphate synthase, large subunit	PF02786.13	Bacteria	Bacteroidetes	Bacteroidia	Bacteroidales	Bacteroidaceae	Bacteroides	Bacteroides graminisolvens	0.000299987	0.00028761	0.000280002	0.000268758	0.00033877	0.000331975	0.000346491	0.000194436	0.000364905	0.000266011	0.000349917	0.000308966	0.000266577	0.000263726	0.000224255	0.000275892
A0A069CZG9	NA	COG3086	cellular processes and signaling	T : Signal transduction	Positive regulator of sigma E activity	no hit	-	-	-	PF04246.8	Bacteria	Bacteroidetes	Bacteroidia	Bacteroidales	Bacteroidaceae	Bacteroides	Bacteroides graminisolvens	0	0.000324652	0	0	0	0	0	0	0	0	0	0	0	0	0	0
A0A069CZH1	NA	COG4198	poorly characterized	S : Function unknown	Uncharacterized conserved protein	no hit	-	-	-	PF06245.7	Bacteria	Bacteroidetes	Bacteroidia	Bacteroidales	Bacteroidaceae	Bacteroides	Bacteroides graminisolvens	0.000148297	0.000235159	0.000186673	0.000160222	0.000322926	0.000343495	0.000387997	0.000206078	0.000335779	0.000556123	0.000403982	0.00049248	0.000185745	0.000402993	0.000372134	0.000391828
A0A069CZH4	NA	COG1506	metabolism	E : Amino acid	Dipeptidyl aminopeptidases/acylaminoacyl-peptidases	no hit	-	-	-	PF00326.17	Bacteria	Bacteroidetes	Bacteroidia	Bacteroidales	Bacteroidaceae	Bacteroides	Bacteroides graminisolvens	9.08e-05	0	0	0	0	0.000157706	0.000184087	0	0.000117709	0.000133772	0.000144148	0.000118112	0.000119034	7.9e-05	7.36e-05	0.000118408
A0A069CZH9	NA	COG3579	metabolism	E : Amino acid	Aminopeptidase C	no hit	-	-	-	PF03051.11	Bacteria	Bacteroidetes	Bacteroidia	Bacteroidales	Bacteroidaceae	Bacteroides	Bacteroides graminisolvens	0	0	0	0	0	0.00011466	0	0	0	8.48e-05	9.36e-05	0.000105396	7.48e-05	8.7e-05	0	0.000100904
A0A069CZI1	NA	COG1453	poorly characterized	R : General function prediction only	Predicted oxidoreductases of the aldo/keto reductase family	TIGR01409	Protein fate	Protein and peptide secretion and trafficking	Tat (twin-arginine translocation) pathway signal sequence	PF00248.17	Bacteria	Bacteroidetes	Bacteroidia	Bacteroidales	Bacteroidaceae	Bacteroides	Bacteroides graminisolvens	0	9.17e-05	0	0	0.000145985	0.000116756	0	0	0.000121563	0.000194112	0.00018439	0.000103376	7.03e-05	7.82e-05	0.000157654	0.000166209
A0A069CZI4	GH28	COG5434	cellular processes and signaling	M : Cell wall	Endopolygalacturonase	no hit	-	-	-	PF00295.13	Bacteria	Bacteroidetes	Bacteroidia	Bacteroidales	Bacteroidaceae	Bacteroides	Bacteroides graminisolvens	0	9.91e-05	0.000113982	0	0	0	0	0	0	0	0	0	0	0	0	0
A0A069CZJ0	NA	COG1979	metabolism	C : Energy production and conversion	Uncharacterized oxidoreductases, Fe-dependent alcohol dehydrogenase family	no hit	-	-	-	PF00465.15	Bacteria	Bacteroidetes	Bacteroidia	Bacteroidales	Bacteroidaceae	Bacteroides	Bacteroides graminisolvens	0.00120642	0.00138298	0.00212004	0.00185924	0.000774648	0.00175218	0.00203086	0.00166367	0.00150385	0.00214781	0.00212494	0.00227983	0.0010353	0.00164225	0.00210213	0.00236812
A0A069CZJ2	NA	COG0218	poorly characterized	R : General function prediction only	Predicted GTPase	TIGR03598	Protein synthesis	Other	ribosome biogenesis GTP-binding protein YsxC	PF01926.19	Bacteria	Bacteroidetes	Bacteroidia	Bacteroidales	Bacteroidaceae	Bacteroides	Bacteroides graminisolvens	0	0	0	0	0	0	0	0	0	0	0.000219163	0.000246806	0	0	0	0
A0A069CZJ5	NA	COG0547	metabolism	E : Amino acid	Anthranilate phosphoribosyltransferase	TIGR01245	Amino acid biosynthesis	Aromatic amino acid family	anthranilate phosphoribosyltransferase	PF00591.17	Bacteria	Bacteroidetes	Bacteroidia	Bacteroidales	Bacteroidaceae	Bacteroides	Bacteroides graminisolvens	0	0	0	0	0	0	0	0	0.000365333	0.000238956	0.000169325	0	0.000411116	0.000108504	0.000191705	0
A0A069CZJ6	NA	COG1629	metabolism	P : Inorganic ion	Outer membrane receptor proteins, mostly Fe transport	no hit	-	-	-	PF07715.11	Bacteria	Bacteroidetes	Bacteroidia	Bacteroidales	Bacteroidaceae	Bacteroides	Bacteroides graminisolvens	0.00190001	0.00145396	0.00160886	0.00164419	0.00192672	0.00159431	0.0014117	0.00122315	0.00156121	0.00131757	0.00155092	0.00181641	0.00164972	0.000963524	0.000964246	0.00104474
A0A069CZK1	NA	COG0745	cellular processes and signaling	T : Signal transduction	Response regulators consisting of a CheY-like receiver domain and a winged-helix DNA-binding domain	no hit	-	-	-	PF00072.20	Bacteria	Bacteroidetes	Bacteroidia	Bacteroidales	Bacteroidaceae	Bacteroides	Bacteroides graminisolvens	0	0	0	0	0	0.000670091	0	0	0.000441288	0.00074607	0.000462994	0.0010359	0.000404348	0.000525838	0.000645636	0.000391844
A0A069CZK3	NA	COG0757	metabolism	E : Amino acid	3-dehydroquinate dehydratase II	TIGR01088	Amino acid biosynthesis	Aromatic amino acid family	3-dehydroquinate dehydratase, type II	PF01220.15	Bacteria	Bacteroidetes	Bacteroidia	Bacteroidales	Bacteroidaceae	Bacteroides	Bacteroides graminisolvens	0	0	0	0	0.000835771	0.0003849	0	0	0	0	0	0.000336005	0	0	0	0.00036267
A0A069CZK5	NA	COG3118	cellular processes and signaling	O : Posttranslational modification	Thioredoxin domain-containing protein	TIGR01068	Energy metabolism	Electron transport	thioredoxin	PF00085.16	Bacteria	Bacteroidetes	Bacteroidia	Bacteroidales	Bacteroidaceae	Bacteroides	Bacteroides graminisolvens	0	0	0	0	0.000432303	0.000460312	0	0.000492545	0.000233427	0.00040659	0.000361591	0.000306118	0.00035853	0.000651931	0.00067744	0.000316478
A0A069CZK8	NA	COG1882	metabolism	C : Energy production and conversion	Pyruvate-formate lyase	TIGR01255	Energy metabolism	Fermentation	formate acetyltransferase	PF02901.11	Bacteria	Bacteroidetes	Bacteroidia	Bacteroidales	Bacteroidaceae	Bacteroides	Bacteroides graminisolvens	0.000102179	7.59e-05	6.73e-05	0	9.03e-05	0	0	0	0.00022504	0	0	0	0.000304192	0	0	0
A0A069CZL2	NA	COG0583	information storage and processing	K : Transcription	Transcriptional regulator	no hit	-	-	-	PF03466.16	Bacteria	Bacteroidetes	Bacteroidia	Bacteroidales	Bacteroidaceae	Bacteroides	Bacteroides graminisolvens	0	0	0	0	0	0	0	0	0.000117471	0	0	0	0	0	0	0
A0A069CZL7	NA	COG1087	cellular processes and signaling	M : Cell wall	UDP-glucose 4-epimerase	TIGR01179	Energy metabolism	Sugars	UDP-glucose 4-epimerase GalE	PF16363.1	Bacteria	Bacteroidetes	Bacteroidia	Bacteroidales	Bacteroidaceae	Bacteroides	Bacteroides graminisolvens	0	0.000286986	0.00033685	0.000294682	0.000584364	0.000622106	0.000547718	0.000725129	0.000799327	0.000958851	0.00106253	0.000974856	0.000922113	0.000756298	0.000806031	0.000701177
A0A069CZL8	NA	no hit	-	S : Function unknown	-	no hit	-	-	-	no hit	Bacteria	Bacteroidetes	Bacteroidia	Bacteroidales	Bacteroidaceae	Bacteroides	Bacteroides graminisolvens	0	0	0.000625263	0.000545168	0.000356421	0	0	0	0.0015623	0.000476215	0.000438992	0.000989912	0.00174408	0.000603587	0.000531379	0.000712636
A0A069CZM4	NA	no hit	-	S : Function unknown	-	no hit	-	-	-	PF11738.4	Bacteria	Bacteroidetes	Bacteroidia	Bacteroidales	Bacteroidaceae	Bacteroides	Bacteroides graminisolvens	0	0	0	0	0	0	0	0	0.00016793	0.000218782	0	0.000173549	0	0	0	0
A0A069CZN1	NA	COG0513	information storage and processing	L : Replication	Superfamily II DNA and RNA helicases	no hit	-	-	-	PF00270.25	Bacteria	Bacteroidetes	Bacteroidia	Bacteroidales	Bacteroidaceae	Bacteroides	Bacteroides graminisolvens	0	0	0	0	0	0	0	0	8.11e-05	0	9.78e-05	0.000104306	0	0	0	0
A0A069CZN3	NA	COG1805	metabolism	C : Energy production and conversion	Na+-transporting NADH:ubiquinone oxidoreductase, subunit NqrB	TIGR01937	Transport and binding proteins	Cations and iron carrying compounds	NADH:ubiquinone oxidoreductase, Na(+)-translocating, B subunit	PF03116.11	Bacteria	Bacteroidetes	Bacteroidia	Bacteroidales	Bacteroidaceae	Bacteroides	Bacteroides graminisolvens	0	0	0.000123868	0.000137753	0	0	0	0	0.000142356	0	0	0	0.000123785	0	0	0
A0A069CZQ1	NA	COG1866	metabolism	C : Energy production and conversion	Phosphoenolpyruvate carboxykinase (ATP)	TIGR00224	Energy metabolism	Glycolysis/gluconeogenesis	phosphoenolpyruvate carboxykinase (ATP)	PF01293.16	Bacteria	Bacteroidetes	Bacteroidia	Bacteroidales	Bacteroidaceae	Bacteroides	Bacteroides graminisolvens	0.00318697	0.00259492	0.00199856	0.00209072	0.00237636	0.00206635	0.0026929	0.00164088	0.00117134	0.00154421	0.00156024	0.00171557	0.00114532	0.00128575	0.00128426	0.00149759
A0A069CZQ6	NA	COG0342	cellular processes and signaling	U : Intracellular trafficking	Preprotein translocase subunit SecD	TIGR01129	Protein fate	Protein and peptide secretion and trafficking	protein-export membrane protein SecD	PF02355.12	Bacteria	Bacteroidetes	Bacteroidia	Bacteroidales	Bacteroidaceae	Bacteroides	Bacteroides graminisolvens	0.000507661	0.000250906	0.000314083	0.000316259	0.000377199	0.000336426	0.000375083	0.000171216	0.000620462	0.000327128	0.000377242	0.000391551	0.000457497	0.000267026	0.000315067	0.000311655
A0A069CZR0	NA	COG0776	information storage and processing	L : Replication	Bacterial nucleoid DNA-binding protein	no hit	-	-	-	PF00216.17	Bacteria	Bacteroidetes	Bacteroidia	Bacteroidales	Bacteroidaceae	Bacteroides	Bacteroides graminisolvens	0.00599575	0.00578195	0.00625337	0.00981287	0.0146724	0.0168459	0.0147347	0.00983904	0.00522713	0.00823328	0.00809908	0.00875939	0.00436202	0.00744304	0.00716107	0.00563217
A0A069CZR4	NA	COG1729	poorly characterized	S : Function unknown	Uncharacterized protein conserved in bacteria	TIGR02795	-	-	tol-pal system protein YbgF	PF13432.2	Bacteria	Bacteroidetes	Bacteroidia	Bacteroidales	Bacteroidaceae	Bacteroides	Bacteroides graminisolvens	0	4.19e-05	4.97e-05	7.14e-05	0.000115479	0.000106289	6.99e-05	5.82e-05	0.000136664	6.26e-05	5.52e-05	0.000108834	6.77e-05	0	4.11e-05	7.58e-05
A0A069CZR9	NA	COG0793	cellular processes and signaling	M : Cell wall	Periplasmic protease	no hit	-	-	-	PF03572.14	Bacteria	Bacteroidetes	Bacteroidia	Bacteroidales	Bacteroidaceae	Bacteroides	Bacteroides graminisolvens	0	0.000163584	0.000152553	0.000305239	0	0	0	0	0.000212431	0.00024346	0	0	0.000103917	8.31e-05	9.56e-05	0
A0A069CZS4	GH137-GH2-CBM57	COG3250	metabolism	G : Carbohydrate	Beta-galactosidase/beta-glucuronidase	no hit	-	-	-	PF11721.4	Bacteria	Bacteroidetes	Bacteroidia	Bacteroidales	Bacteroidaceae	Bacteroides	Bacteroides graminisolvens	0	0	0	3.99e-05	0	0	0	0	0	0	0	0	0	0	0	0
A0A069CZS5	NA	COG2217	metabolism	P : Inorganic ion	Cation transport ATPase	TIGR01525	-	-	heavy metal translocating P-type ATPase	PF00122.16	Bacteria	Bacteroidetes	Bacteroidia	Bacteroidales	Bacteroidaceae	Bacteroides	Bacteroides graminisolvens	0	0	0	0	0	7.25e-05	0	0	0	7.13e-05	9.61e-05	8.66e-05	0	0	5.59e-05	6.83e-05
A0A069CZT1	NA	no hit	-	S : Function unknown	-	no hit	-	-	-	PF13715.2	Bacteria	Bacteroidetes	Bacteroidia	Bacteroidales	Bacteroidaceae	Bacteroides	Bacteroides graminisolvens	0	0	0.000364916	0.00044043	0	0	0	0	0.000980689	0.000288942	0.000383384	0.000440611	0.000876149	0.000415168	0.000342435	0.000408035
A0A069CZU1	NA	no hit	-	S : Function unknown	-	no hit	-	-	-	PF14902.2	Bacteria	Bacteroidetes	Bacteroidia	Bacteroidales	Bacteroidaceae	Bacteroides	Bacteroides graminisolvens	0	0	0	0	0	0	0	0.000748935	0	0.00023978	0.000716895	0.000443631	0	0.000673828	0.000658462	0.000852708
A0A069CZU6	NA	COG0452	metabolism	H : Coenzyme	Phosphopantothenoylcysteine synthetase/decarboxylase	no hit	-	-	-	PF02441.15	Bacteria	Bacteroidetes	Bacteroidia	Bacteroidales	Bacteroidaceae	Bacteroides	Bacteroides graminisolvens	0	0	0	0	0	0	0	0	0.000217665	0.000192913	0.000273398	0.000311025	0.00016614	0.000304718	0.000201416	0.000229372
A0A069CZU7	NA	COG0357	cellular processes and signaling	M : Cell wall	Predicted S-adenosylmethionine-dependent methyltransferase involved in bacterial cell division	TIGR00138	Protein synthesis	tRNA and rRNA base modification	16S rRNA (guanine(527)-N(7))-methyltransferase RsmG	PF02527.11	Bacteria	Bacteroidetes	Bacteroidia	Bacteroidales	Bacteroidaceae	Bacteroides	Bacteroides graminisolvens	0	0	0	0	0	0	0	0.000266532	0	0.000320651	0.000196391	0.000332931	0.000165334	0.000318388	0	0
A0A069CZU8	NA	no hit	-	S : Function unknown	-	no hit	-	-	-	no hit	Bacteria	Bacteroidetes	Bacteroidia	Bacteroidales	Bacteroidaceae	Bacteroides	Bacteroides graminisolvens	0	0	0	0	0	0.000753538	0	0	0	0	0	0	0	0	0	0
A0A069CZV0	NA	COG1629	metabolism	P : Inorganic ion	Outer membrane receptor proteins, mostly Fe transport	no hit	-	-	-	PF00593.20	Bacteria	Bacteroidetes	Bacteroidia	Bacteroidales	Bacteroidaceae	Bacteroides	Bacteroides graminisolvens	0.00167345	0.00188105	0.00218963	0.00205956	0.00155226	0.00181433	0.00204893	0.00174756	0.00161858	0.00177508	0.00186663	0.0021719	0.0014445	0.00164452	0.00155472	0.00185333
A0A069CZV7	NA	COG0139	metabolism	E : Amino acid	Phosphoribosyl-AMP cyclohydrolase	TIGR03188	Amino acid biosynthesis	Histidine family	phosphoribosyl-ATP diphosphatase	PF01502.14	Bacteria	Bacteroidetes	Bacteroidia	Bacteroidales	Bacteroidaceae	Bacteroides	Bacteroides graminisolvens	0.000240709	0.000204877	0	0	0.000563942	0.000259715	0.000358321	0.000382506	0.000338485	0.000824883	0.000279921	0.000309515	0.000713174	0.000580861	0.000591286	0.000390299
A0A069CZW2	NA	COG3968	poorly characterized	R : General function prediction only	Uncharacterized protein related to glutamine synthetase	no hit	-	-	-	PF12437.4	Bacteria	Bacteroidetes	Bacteroidia	Bacteroidales	Bacteroidaceae	Bacteroides	Bacteroides graminisolvens	5.84e-05	0	0	0	9.15e-05	0	0	0	4.95e-05	7.75e-05	9.4e-05	0.000107197	4.79e-05	4.9e-05	5.64e-05	6.7e-05
A0A069CZW3	NA	no hit	-	S : Function unknown	-	no hit	-	-	-	no hit	Bacteria	Bacteroidetes	Bacteroidia	Bacteroidales	Bacteroidaceae	Bacteroides	Bacteroides graminisolvens	0.000250119	0.00043934	0.000195209	0.000210934	0	0	0.000245332	0.000356466	0.000486506	0.00127494	0.000778594	0.000977427	0.000136989	0.000819502	0.00064012	0.00069025
A0A069CZW7	NA	COG1629	metabolism	P : Inorganic ion	Outer membrane receptor proteins, mostly Fe transport	TIGR04056	Transport and binding proteins	Unknown substrate	TonB-linked outer membrane protein, SusC/RagA family	PF00593.20	Bacteria	Bacteroidetes	Bacteroidia	Bacteroidales	Bacteroidaceae	Bacteroides	Bacteroides graminisolvens	0.0017842	0.00194417	0.001951	0.00228212	0.00113706	0.000939332	0.00153764	0.00134757	0.00258799	0.00222055	0.00229314	0.0029439	0.00205813	0.00210153	0.00206867	0.00221681
A0A069CZW9	NA	COG2871	metabolism	C : Energy production and conversion	Na+-transporting NADH:ubiquinone oxidoreductase, subunit NqrF	TIGR01941	Transport and binding proteins	Cations and iron carrying compounds	NADH:ubiquinone oxidoreductase, Na(+)-translocating, F subunit	PF00175.17	Bacteria	Bacteroidetes	Bacteroidia	Bacteroidales	Bacteroidaceae	Bacteroides	Bacteroides graminisolvens	0.000263209	0.0005775	0.000400604	0.000292395	0.000485559	0.000775458	0.00042326	0.000418116	0.000692221	0.000841923	0.000645282	0.000924926	0.000406454	0.000577467	0.000648205	0.000473952
A0A069CZX0	NA	COG4206	metabolism	H : Coenzyme	Outer membrane cobalamin receptor protein	TIGR04056	Transport and binding proteins	Unknown substrate	TonB-linked outer membrane protein, SusC/RagA family	PF07715.11	Bacteria	Bacteroidetes	Bacteroidia	Bacteroidales	Bacteroidaceae	Bacteroides	Bacteroides graminisolvens	0.000111769	3.87e-05	6.73e-05	9.3e-05	0	4.86e-05	6.38e-05	0	7.25e-05	6.74e-05	9.14e-05	0.000147162	4.07e-05	8.13e-05	3.75e-05	0.000119102
A0A069CZX1	NA	no hit	-	S : Function unknown	-	no hit	-	-	-	PF12771.3	Bacteria	Bacteroidetes	Bacteroidia	Bacteroidales	Bacteroidaceae	Bacteroides	Bacteroides graminisolvens	0	0	0.000622349	0.000718406	0.00061236	0.000396305	0.000521108	0.000441563	0.000509201	0	0	0.00036381	0.000598649	0.000266036	0	0
A0A069CZX4	NA	COG1726	metabolism	C : Energy production and conversion	Na+-transporting NADH:ubiquinone oxidoreductase, subunit NqrA	TIGR01936	Transport and binding proteins	Cations and iron carrying compounds	NADH:ubiquinone oxidoreductase, Na(+)-translocating, A subunit	PF05896.7	Bacteria	Bacteroidetes	Bacteroidia	Bacteroidales	Bacteroidaceae	Bacteroides	Bacteroides graminisolvens	0.000503281	0.000558491	0.000919728	0.000721316	0.00036579	0.00055227	0.000524356	0.000457006	0.000933121	0.000903789	0.00104274	0.0010749	0.000678502	0.000852791	0.00093767	0.000912388
A0A069CZX8	GH30_4	COG5520	cellular processes and signaling	M : Cell wall	O-Glycosyl hydrolase	no hit	-	-	-	PF14587.2	Bacteria	Bacteroidetes	Bacteroidia	Bacteroidales	Bacteroidaceae	Bacteroides	Bacteroides graminisolvens	0	0	0	0	0	0	0	0	0.000112016	0	0	0	0.000105434	0	0	0
A0A069CZY1	NA	no hit	-	S : Function unknown	-	no hit	-	-	-	PF13715.2	Bacteria	Bacteroidetes	Bacteroidia	Bacteroidales	Bacteroidaceae	Bacteroides	Bacteroides graminisolvens	0.000182944	0.000178451	0.000189756	0.000154284	0.000191449	0	0	0	0.00020675	0	0.000179272	0.000132931	0.000127811	0	0	0
A0A069CZY7	NA	COG0745	cellular processes and signaling	T : Signal transduction	Response regulators consisting of a CheY-like receiver domain and a winged-helix DNA-binding domain	no hit	-	-	-	PF00072.20	Bacteria	Bacteroidetes	Bacteroidia	Bacteroidales	Bacteroidaceae	Bacteroides	Bacteroides graminisolvens	0	0	0	0	0.000360998	0.000233541	0.000325019	0	0	0	0	0	0	0	0	0
A0A069CZZ0	NA	COG1196	cellular processes and signaling	D : Cell cycle control	Chromosome segregation ATPases	no hit	-	-	-	no hit	Bacteria	Bacteroidetes	Bacteroidia	Bacteroidales	Bacteroidaceae	Bacteroides	Bacteroides graminisolvens	0.00279182	0.00257047	0.0035628	0.00385205	0.00261824	0.00362894	0.00410875	0.00343695	0.00294709	0.0031976	0.00350802	0.00372513	0.00267838	0.00296661	0.00381382	0.0040098
A0A069CZZ4	NA	COG0776	information storage and processing	L : Replication	Bacterial nucleoid DNA-binding protein	no hit	-	-	-	PF00216.17	Bacteria	Bacteroidetes	Bacteroidia	Bacteroidales	Bacteroidaceae	Bacteroides	Bacteroides graminisolvens	0.000695983	0.000612474	0.000543189	0.00072274	0	0.000775882	0	0.000829832	0.000604229	0.000859722	0.00108675	0.000854184	0.000487967	0.000844681	0.000668994	0.000706032
A0A069CZZ5	NA	COG0364	metabolism	G : Carbohydrate	Glucose-6-phosphate 1-dehydrogenase	TIGR00871	Energy metabolism	Pentose phosphate pathway	glucose-6-phosphate dehydrogenase	PF02781.12	Bacteria	Bacteroidetes	Bacteroidia	Bacteroidales	Bacteroidaceae	Bacteroides	Bacteroides graminisolvens	0.00159407	0.00166116	0.00186909	0.00200671	0.00130187	0.000842955	0.00121584	0.00128611	0.00101694	0.00158784	0.0014422	0.00167081	0.000709427	0.00120612	0.00145987	0.00132146
A0A069CZZ7	NA	no hit	-	S : Function unknown	-	no hit	-	-	-	PF10459.5	Bacteria	Bacteroidetes	Bacteroidia	Bacteroidales	Bacteroidaceae	Bacteroides	Bacteroides graminisolvens	0.000906579	0.000782084	0.00106105	0.00105235	0.000229317	0.000568641	0.00062087	0.000415396	0.000935926	0.00097835	0.00112455	0.00110266	0.000691817	0.000597087	0.000630938	0.000830975
A0A069CZZ8	NA	no hit	-	S : Function unknown	-	no hit	-	-	-	no hit	Bacteria	Bacteroidetes	Bacteroidia	Bacteroidales	Bacteroidaceae	Bacteroides	Bacteroides graminisolvens	0.00122016	0.000922343	0.000935187	0.00107654	0.000722667	0.000808286	0.00109463	0.00099279	0.00131238	0.00106266	0.00131512	0.00144164	0.00111196	0.000845039	0.000999858	0.000971567
A0A069D002	NA	COG1162	poorly characterized	R : General function prediction only	Predicted GTPases	TIGR00157	Protein synthesis	Translation factors	ribosome small subunit-dependent GTPase A	PF03193.12	Bacteria	Bacteroidetes	Bacteroidia	Bacteroidales	Bacteroidaceae	Bacteroides	Bacteroides graminisolvens	0	0	0	0	0	0	0	0	0	0	0	0.000166803	0	0	0	0
A0A069D006	NA	no hit	-	S : Function unknown	-	no hit	-	-	-	no hit	Bacteria	Bacteroidetes	Bacteroidia	Bacteroidales	Bacteroidaceae	Bacteroides	Bacteroides graminisolvens	0	0	0	0	0	0	0	0	0	3.61e-05	0	0	3.38e-05	0	0	0
A0A069D010	NA	COG1260	metabolism	I : Lipid	Myo-inositol-1-phosphate synthase	no hit	-	-	-	PF07994.8	Bacteria	Bacteroidetes	Bacteroidia	Bacteroidales	Bacteroidaceae	Bacteroides	Bacteroides graminisolvens	0.00133715	0.00188805	0.00207567	0.00169096	0.000460279	0.000908476	0.000892265	0.000703721	0.00125143	0.00233395	0.00289083	0.00260888	0.00131519	0.00207681	0.00178521	0.0022522
A0A069D018	NA	COG4690	metabolism	E : Amino acid	Dipeptidase	no hit	-	-	-	PF03577.11	Bacteria	Bacteroidetes	Bacteroidia	Bacteroidales	Bacteroidaceae	Bacteroides	Bacteroides graminisolvens	0.000312292	0.0002837	0.000271769	0.00015372	0.000122724	0.000228528	0.000136318	0.000178446	0.000269066	0.0001799	0.000259728	0.000206412	0.000265655	0.000185626	0.000192314	0.000150561
A0A069D024	NA	COG0686	metabolism	E : Amino acid	Alanine dehydrogenase	no hit	-	-	-	PF01262.17	Bacteria	Bacteroidetes	Bacteroidia	Bacteroidales	Bacteroidaceae	Bacteroides	Bacteroides graminisolvens	0	0.000154752	0.00018492	0.00026433	0.000427104	0.000196621	0.000363342	0	0	0	0.000157656	0	0	0	0	0
A0A069D026	NA	COG1629	metabolism	P : Inorganic ion	Outer membrane receptor proteins, mostly Fe transport	TIGR04056	Transport and binding proteins	Unknown substrate	TonB-linked outer membrane protein, SusC/RagA family	PF00593.20	Bacteria	Bacteroidetes	Bacteroidia	Bacteroidales	Bacteroidaceae	Bacteroides	Bacteroides graminisolvens	0	0	0.000803624	0.000727319	0.000191387	0	0.000103493	0.000154238	0.00207585	0.00051272	0.000589897	0.000827098	0.00209673	0.000653506	0.000413572	0.000531326
A0A069D034	NA	COG0498	metabolism	E : Amino acid	Threonine synthase	no hit	-	-	-	PF14821.2	Bacteria	Bacteroidetes	Bacteroidia	Bacteroidales	Bacteroidaceae	Bacteroides	Bacteroides graminisolvens	0	0	0	0	0	0.000754801	0	0	0	0	0	0.000691751	0	0	0	0
A0A069D039	NA	COG1629	metabolism	P : Inorganic ion	Outer membrane receptor proteins, mostly Fe transport	no hit	-	-	-	PF07715.11	Bacteria	Bacteroidetes	Bacteroidia	Bacteroidales	Bacteroidaceae	Bacteroides	Bacteroides graminisolvens	0	0	0	9.05e-05	0	0	0	7.85e-05	0	0	8.96e-05	0.000133391	0	0	0	0
A0A069D041	NA	COG1225	cellular processes and signaling	O : Posttranslational modification	Peroxiredoxin	no hit	-	-	-	PF08534.6	Bacteria	Bacteroidetes	Bacteroidia	Bacteroidales	Bacteroidaceae	Bacteroides	Bacteroides graminisolvens	0.000254526	0.000226907	0.000357068	0.000357484	0.000528656	0.000479152	0.000491879	0.00032049	0.000300019	0.000282728	0.000375139	0.000422499	0.000298775	0.000274075	0.000268546	0.000381035
A0A069D043	NA	no hit	-	S : Function unknown	-	no hit	-	-	-	PF13149.2	Bacteria	Bacteroidetes	Bacteroidia	Bacteroidales	Bacteroidaceae	Bacteroides	Bacteroides graminisolvens	0.000188099	0	0.000120709	0	0.000161853	0	0	0	0	0.000131206	0.000266295	0.000118634	0	0	0.000120657	0
A0A069D051	NA	COG4677	metabolism	G : Carbohydrate	Pectin methylesterase	no hit	-	-	-	no hit	Bacteria	Bacteroidetes	Bacteroidia	Bacteroidales	Bacteroidaceae	Bacteroides	Bacteroides graminisolvens	0	0	5.76e-05	0	9.79e-05	6.33e-05	0	6.51e-05	0	0	0	0	0	0	0	0
A0A069D053	NA	COG1629	metabolism	P : Inorganic ion	Outer membrane receptor proteins, mostly Fe transport	TIGR04056	Transport and binding proteins	Unknown substrate	TonB-linked outer membrane protein, SusC/RagA family	PF07715.11	Bacteria	Bacteroidetes	Bacteroidia	Bacteroidales	Bacteroidaceae	Bacteroides	Bacteroides graminisolvens	0.000103464	4.23e-05	8.28e-05	0	0.000199228	5.3e-05	0	0	0.000257845	7.37e-05	7.95e-05	7.79e-05	0.000291514	5.33e-05	7.68e-05	0.00011523
A0A069D063	NA	no hit	-	S : Function unknown	-	no hit	-	-	-	PF16383.1	Bacteria	Bacteroidetes	Bacteroidia	Bacteroidales	Bacteroidaceae	Bacteroides	Bacteroides graminisolvens	0	0	0	0	0	0	0.000148819	0	0	0	0.00011625	0.000195063	0	0	0	0
A0A069D065	NA	COG3956	poorly characterized	R : General function prediction only	Protein containing tetrapyrrole methyltransferase domain and MazG-like (predicted pyrophosphatase) domain	TIGR00444	Unknown function	General	MazG family protein	PF03819.13	Bacteria	Bacteroidetes	Bacteroidia	Bacteroidales	Bacteroidaceae	Bacteroides	Bacteroides graminisolvens	0	0.000270734	0	0	0	0	0	0.000210366	0	0	0	0	0.000134365	0.000207275	0	0
A0A069D068	NA	COG5016	metabolism	C : Energy production and conversion	Pyruvate/oxaloacetate carboxyltransferase	no hit	-	-	-	PF02436.14	Bacteria	Bacteroidetes	Bacteroidia	Bacteroidales	Bacteroidaceae	Bacteroides	Bacteroides graminisolvens	0.000590207	0.000761817	0.000720465	0.000523529	0.000237967	0.000611445	0.000642142	0.000453449	0.000452793	0.00116186	0.00113207	0.00110159	0.000311037	0.000744578	0.000625181	0.000772284
A0A069D069	NA	COG4771	metabolism	P : Inorganic ion	Outer membrane receptor for ferrienterochelin and colicins	TIGR04056	Transport and binding proteins	Unknown substrate	TonB-linked outer membrane protein, SusC/RagA family	PF07715.11	Bacteria	Bacteroidetes	Bacteroidia	Bacteroidales	Bacteroidaceae	Bacteroides	Bacteroides graminisolvens	0.000102425	6.6e-05	7.79e-05	6.26e-05	0.00028161	0.000201291	0.000257816	8.24e-05	5.41e-05	0.000109985	8.16e-05	8.93e-05	5.39e-05	7.31e-05	6.81e-05	6.07e-05
A0A069D070	NA	no hit	-	S : Function unknown	-	no hit	-	-	-	no hit	Bacteria	Bacteroidetes	Bacteroidia	Bacteroidales	Bacteroidaceae	Bacteroides	Bacteroides graminisolvens	0.000557727	0.000544681	0.000768297	0.00133976	0.000759294	0.000349681	0.000693723	0.000382897	0.000449295	0.000937379	0.00102399	0.000835024	0.000363216	0.00048968	0.000544811	0.000424542
A0A069D072	NA	no hit	-	S : Function unknown	-	no hit	-	-	-	no hit	Bacteria	Bacteroidetes	Bacteroidia	Bacteroidales	Bacteroidaceae	Bacteroides	Bacteroides graminisolvens	0.00010292	9.17e-05	0.000108638	0	0	0	0.000152934	0	0.000199501	8.6e-05	8.79e-05	0.000202546	0.00012487	7.81e-05	0	0.000106634
A0A069D074	NA	COG1951	metabolism	C : Energy production and conversion	Tartrate dehydratase alpha subunit/Fumarate hydratase class I, N-terminal domain	TIGR00723	-	-	hydrolyase, tartrate beta subunit/fumarate domain protein, Fe-S type	PF05683.8	Bacteria	Bacteroidetes	Bacteroidia	Bacteroidales	Bacteroidaceae	Bacteroides	Bacteroides graminisolvens	0.000743688	0.00102886	0.000823784	0.000626778	0.000635978	0.00126901	0.000765655	0.00122376	0.001221	0.00164866	0.00183712	0.00208726	0.000984291	0.00120581	0.00106407	0.00112231
A0A069D075	NA	COG0539	information storage and processing	J : Translation	Ribosomal protein S1	no hit	-	-	-	PF00575.19	Bacteria	Bacteroidetes	Bacteroidia	Bacteroidales	Bacteroidaceae	Bacteroides	Bacteroides graminisolvens	0.000661215	0.000660544	0.0005823	0.000485571	0.000529433	0.000869307	0.000328654	0.000347171	0.00112382	0.000701922	0.000755728	0.000816765	0.00107827	0.000456614	0.000152029	0
A0A069D076	NA	COG1703	metabolism	E : Amino acid	Putative periplasmic protein kinase ArgK and related GTPases of G3E family	TIGR00750	Transport and binding proteins	Amino acids, peptides and amines	LAO/AO transport system ATPase	PF03308.12	Bacteria	Bacteroidetes	Bacteroidia	Bacteroidales	Bacteroidaceae	Bacteroides	Bacteroides graminisolvens	0.000135481	0.000171351	0	0	0.000183079	0.000340919	0.000426474	0.000374813	0.000175676	0.000292089	0.000236993	0.000402577	0.000122673	0.000170698	0.000383644	0.000137735
A0A069D077	NA	COG1271	metabolism	C : Energy production and conversion	Cytochrome bd-type quinol oxidase, subunit 1	no hit	-	-	-	PF01654.13	Bacteria	Bacteroidetes	Bacteroidia	Bacteroidales	Bacteroidaceae	Bacteroides	Bacteroides graminisolvens	0.000388835	0.0002387	0.000172254	0.000451587	0.000229476	0.000610902	0.000625237	0.000261454	0.000369817	0.000175632	0.000146857	0.000162494	0.00050952	0.000265098	0	0
A0A069D080	NA	COG0492	cellular processes and signaling	O : Posttranslational modification	Thioredoxin reductase	TIGR01292	Energy metabolism	Electron transport	thioredoxin-disulfide reductase	PF07992.10	Bacteria	Bacteroidetes	Bacteroidia	Bacteroidales	Bacteroidaceae	Bacteroides	Bacteroides graminisolvens	0.000964939	0.000671504	0.000524486	0.000555702	0.000739948	0.000908874	0.00102952	0.000595036	0.000680854	0.000602013	0.00076489	0.000855087	0.000707431	0.000648252	0.000563243	0.000630643
A0A069D084	NA	COG1092	poorly characterized	R : General function prediction only	Predicted SAM-dependent methyltransferases	no hit	-	-	-	no hit	Bacteria	Bacteroidetes	Bacteroidia	Bacteroidales	Bacteroidaceae	Bacteroides	Bacteroides graminisolvens	0	0	0	0	0	0	0	0	0	0.00021609	0.000233056	0	0	0	0	0
A0A069D086	NA	COG0362	metabolism	G : Carbohydrate	6-phosphogluconate dehydrogenase	TIGR00873	Energy metabolism	Pentose phosphate pathway	6-phosphogluconate dehydrogenase (decarboxylating)	PF00393.15	Bacteria	Bacteroidetes	Bacteroidia	Bacteroidales	Bacteroidaceae	Bacteroides	Bacteroides graminisolvens	0.00215454	0.00154841	0.00203708	0.00224318	0.000811593	0.00156446	0.00115924	0.0010542	0.00133934	0.00182703	0.00214716	0.00205319	0.0009219	0.0016463	0.00166437	0.00192715
A0A069D087	NA	COG1629	metabolism	P : Inorganic ion	Outer membrane receptor proteins, mostly Fe transport	TIGR04056	Transport and binding proteins	Unknown substrate	TonB-linked outer membrane protein, SusC/RagA family	PF07715.11	Bacteria	Bacteroidetes	Bacteroidia	Bacteroidales	Bacteroidaceae	Bacteroides	Bacteroides graminisolvens	3.99e-05	7.84e-05	4.67e-05	7.49e-05	9.2e-05	0.000667211	0.000497856	0.000341936	0	0	0	0	0	0	0	0
A0A069D090	NA	COG1022	metabolism	I : Lipid	Long-chain acyl-CoA synthetases (AMP-forming)	no hit	-	-	-	PF00501.24	Bacteria	Bacteroidetes	Bacteroidia	Bacteroidales	Bacteroidaceae	Bacteroides	Bacteroides graminisolvens	0.000169989	7.58e-05	8.97e-05	0.000152682	0	0.000127968	0	0.00016381	0	0	0	8.38e-05	6.12e-05	0	0	0
A0A069D094	NA	no hit	-	S : Function unknown	-	no hit	-	-	-	PF16120.1	Bacteria	Bacteroidetes	Bacteroidia	Bacteroidales	Bacteroidaceae	Bacteroides	Bacteroides graminisolvens	0	0	0	0	0	0	0	0	0	0	0.000186445	0	0	0	0	0
A0A069D097	NA	COG1597	metabolism	I : Lipid	Sphingosine kinase and enzymes related to eukaryotic diacylglycerol kinase	no hit	-	-	-	PF00781.20	Bacteria	Bacteroidetes	Bacteroidia	Bacteroidales	Bacteroidaceae	Bacteroides	Bacteroides graminisolvens	0.000138729	0	0.000163306	0	0.000268404	0	0	0.000187337	0	0	0	0	0	0	0	0
A0A069D098	GH3	COG1472	metabolism	G : Carbohydrate	Beta-glucosidase-related glycosidases	no hit	-	-	-	PF00933.17	Bacteria	Bacteroidetes	Bacteroidia	Bacteroidales	Bacteroidaceae	Bacteroides	Bacteroides graminisolvens	0.000205562	0.000314585	0.000309341	0.00027817	8.82e-05	0.000258059	0.000378222	0.000325511	0.00043004	0.000379133	0.000589528	0.000514107	0.000417173	0.000381644	0.00046244	0.000524681
A0A069D0A5	NA	COG2942	metabolism	G : Carbohydrate	N-acyl-D-glucosamine 2-epimerase	no hit	-	-	-	PF07221.7	Bacteria	Bacteroidetes	Bacteroidia	Bacteroidales	Bacteroidaceae	Bacteroides	Bacteroides graminisolvens	0	0.00015837	0	0	0	0	0	0	0	0.000105345	0	0	0	0	0	0
A0A069D0A7	NA	COG0493	metabolism	E : Amino acid	NADPH-dependent glutamate synthase beta chain and related oxidoreductases	TIGR01316	Amino acid biosynthesis	Glutamate family	glutamate synthase (NADPH), homotetrameric	PF14691.2	Bacteria	Bacteroidetes	Bacteroidia	Bacteroidales	Bacteroidaceae	Bacteroides	Bacteroides graminisolvens	0.000427777	0.000460152	0.000323522	0.000291129	0.000239763	0.000350096	0.000522589	0.000353214	0.000523485	0.000668954	0.000486043	0.000736382	0.000487524	0.000427171	0.000309219	0.00027941
A0A069D0B2	GH57	COG1449	metabolism	G : Carbohydrate	Alpha-amylase/alpha-mannosidase	no hit	-	-	-	PF03065.11	Bacteria	Bacteroidetes	Bacteroidia	Bacteroidales	Bacteroidaceae	Bacteroides	Bacteroides graminisolvens	0.000743409	0.000896742	0.000897684	0.00118354	0.000405238	0.000699295	0.000550096	0.000609704	0.000715315	0.000671072	0.000754526	0.000573015	0.000448133	0.000497562	0.000524069	0.000518781
A0A069D0B3	GH23-CBM50	COG0741	cellular processes and signaling	M : Cell wall	Soluble lytic murein transglycosylase and related regulatory proteins (some contain LysM/invasin domains)	no hit	-	-	-	PF01464.16	Bacteria	Bacteroidetes	Bacteroidia	Bacteroidales	Bacteroidaceae	Bacteroides	Bacteroides graminisolvens	0	0	0	0	0	0	0	0	0	0	0	0	7.33e-05	0	0	0
A0A069D0B7	NA	COG0496	poorly characterized	R : General function prediction only	Predicted acid phosphatase	TIGR00087	Cellular processes	Adaptations to atypical conditions	5'/3'-nucleotidase SurE	PF01975.13	Bacteria	Bacteroidetes	Bacteroidia	Bacteroidales	Bacteroidaceae	Bacteroides	Bacteroides graminisolvens	0	0	0	0	0	0	0	0	0.000198017	0	0	0	0.000134459	0	0	0
A0A069D0B8	NA	COG0664	cellular processes and signaling	T : Signal transduction	cAMP-binding proteins - catabolite gene activator and regulatory subunit of cAMP-dependent protein kinases	no hit	-	-	-	PF13545.2	Bacteria	Bacteroidetes	Bacteroidia	Bacteroidales	Bacteroidaceae	Bacteroides	Bacteroides graminisolvens	0.00037263	0.000550428	0.000295092	0.000442667	0.000585214	0.000544411	0.000738771	0.000902039	0.000811031	0.000715548	0.000607268	0.000607043	0.000837584	0.000613577	0.00021812	0.00021421
A0A069D0C2	NA	no hit	-	S : Function unknown	-	no hit	-	-	-	PF03993.8	Bacteria	Bacteroidetes	Bacteroidia	Bacteroidales	Bacteroidaceae	Bacteroides	Bacteroides graminisolvens	0.000846494	0.000935085	0.000811519	0.000785505	0.00048675	0.000522254	0.000786791	0.000528624	0.00118478	0.00100131	0.00111458	0.00100075	0.00115817	0.000844105	0.000602569	0.000421733
A0A069D0C3	NA	COG0498	metabolism	E : Amino acid	Threonine synthase	TIGR00260	Amino acid biosynthesis	Aspartate family	threonine synthase	PF00291.21	Bacteria	Bacteroidetes	Bacteroidia	Bacteroidales	Bacteroidaceae	Bacteroides	Bacteroides graminisolvens	0.000118691	0.00011857	0.000139718	0	0	0.000297727	0	0	0.000154423	0	0	0	0.000179922	9.98e-05	0.000114695	0.000280061
A0A069D0C5	NA	COG1195	information storage and processing	L : Replication	Recombinational DNA repair ATPase (RecF pathway)	TIGR00611	DNA metabolism	DNA replication, recombination, and repair	DNA replication and repair protein RecF	PF02463.15	Bacteria	Bacteroidetes	Bacteroidia	Bacteroidales	Bacteroidaceae	Bacteroides	Bacteroides graminisolvens	0.000115172	0.000113759	0	0.00014555	0	0	0	0	0	0.000100174	0.000109047	0	0	0	0	0
A0A069D0C6	NA	COG2195	metabolism	E : Amino acid	Di- and tripeptidases	TIGR01893	-	-	Xaa-His dipeptidase	PF01546.24	Bacteria	Bacteroidetes	Bacteroidia	Bacteroidales	Bacteroidaceae	Bacteroides	Bacteroides graminisolvens	0.000761874	0.000609954	0.000655577	0.000708194	0.000543643	0.000845341	0.00079645	0.000951752	0.0010959	0.00113796	0.0013471	0.0014741	0.000975763	0.00087488	0.000976858	0.00103955
A0A069D0C8	NA	COG1629	metabolism	P : Inorganic ion	Outer membrane receptor proteins, mostly Fe transport	TIGR04056	Transport and binding proteins	Unknown substrate	TonB-linked outer membrane protein, SusC/RagA family	PF13715.2	Bacteria	Bacteroidetes	Bacteroidia	Bacteroidales	Bacteroidaceae	Bacteroides	Bacteroides graminisolvens	0	0	0	0	0	0	0	0	0	3.75e-05	0	0	0	0	0	0
A0A069D0D5	NA	COG2271	metabolism	G : Carbohydrate	Sugar phosphate permease	no hit	-	-	-	PF07690.12	Bacteria	Bacteroidetes	Bacteroidia	Bacteroidales	Bacteroidaceae	Bacteroides	Bacteroides graminisolvens	0	0	0	0	0	0	0	0	9.14e-05	0	0.000128584	0.000191413	0.00013178	0	0	0
A0A069D0D6	NA	no hit	-	S : Function unknown	-	no hit	-	-	-	PF07980.7	Bacteria	Bacteroidetes	Bacteroidia	Bacteroidales	Bacteroidaceae	Bacteroides	Bacteroides graminisolvens	0	0	0	0	0	0	0	0	6.67e-05	0	0	0	0	0	0	0
A0A069D0E5	NA	COG0313	poorly characterized	R : General function prediction only	Predicted methyltransferases	TIGR00096	Protein synthesis	tRNA and rRNA base modification	16S rRNA (cytidine(1402)-2'-O)-methyltransferase	PF00590.16	Bacteria	Bacteroidetes	Bacteroidia	Bacteroidales	Bacteroidaceae	Bacteroides	Bacteroides graminisolvens	0	0	0	0	0	0	0	0	0	0	0	0	0	0.000177429	0	0
A0A069D0E7	GH27	COG3345	metabolism	G : Carbohydrate	Alpha-galactosidase	no hit	-	-	-	PF16499.1	Bacteria	Bacteroidetes	Bacteroidia	Bacteroidales	Bacteroidaceae	Bacteroides	Bacteroides graminisolvens	0	0.000275628	0.000325906	0	0	0.000439387	0.000540665	0.00041694	0	0.000451707	0.000341323	0.000233735	7.95e-05	0.000184535	0.000255205	0.000322185
A0A069D0E8	NA	no hit	-	S : Function unknown	-	no hit	-	-	-	PF14322.2	Bacteria	Bacteroidetes	Bacteroidia	Bacteroidales	Bacteroidaceae	Bacteroides	Bacteroides graminisolvens	0.000158314	0	0	0	0.000397963	0.000148796	0.000116521	0.000108709	0.000103133	0	0	0	0	0	0	0
A0A069D0F2	PL10	no hit	-	S : Function unknown	-	TIGR02474	Energy metabolism	Biosynthesis and degradation of polysaccharides	pectate lyase	PF09492.6	Bacteria	Bacteroidetes	Bacteroidia	Bacteroidales	Bacteroidaceae	Bacteroides	Bacteroides graminisolvens	0.000129704	0.000116946	0.000139906	0	0.000183581	0.000146523	0.000172069	0	9.91e-05	0	0.00017591	0	9.33e-05	0.000146971	0	0
A0A069D0G2	GH130	COG2152	metabolism	G : Carbohydrate	Predicted glycosylase	no hit	-	-	-	PF04041.9	Bacteria	Bacteroidetes	Bacteroidia	Bacteroidales	Bacteroidaceae	Bacteroides	Bacteroides graminisolvens	0.000191484	0.000248869	0.000167714	0.00029178	0.000208759	0.000630183	0.000496919	0.000338496	0.000230067	0.000403835	0.000487783	0.000437783	0.000222018	0.000279507	0.000459501	0.000485229
A0A069D0H1	NA	COG0162	information storage and processing	J : Translation	Tyrosyl-tRNA synthetase	TIGR00234	Protein synthesis	tRNA aminoacylation	tyrosine--tRNA ligase	PF00579.21	Bacteria	Bacteroidetes	Bacteroidia	Bacteroidales	Bacteroidaceae	Bacteroides	Bacteroides graminisolvens	0.000341118	0.000293921	0.000618132	0.000590781	0.000192253	0.000165756	0.000260022	0.000318024	0.000449506	0.00060239	0.000742957	0.000691977	0.000500433	0.000597849	0.000568939	0.000529218
A0A069D0H4	NA	COG0426	metabolism	C : Energy production and conversion	Uncharacterized flavoproteins	no hit	-	-	-	PF00753.23	Bacteria	Bacteroidetes	Bacteroidia	Bacteroidales	Bacteroidaceae	Bacteroides	Bacteroides graminisolvens	0.000190044	0.000105776	0.000169364	0.000135336	0.000207189	0.000223364	0.000184998	0.000144612	9.07e-05	0.000173138	0.000427067	0.000242161	0.000203087	0	0.00016033	0.000245885
A0A069D0H7	NA	COG1225	cellular processes and signaling	O : Posttranslational modification	Peroxiredoxin	no hit	-	-	-	PF00578.17	Bacteria	Bacteroidetes	Bacteroidia	Bacteroidales	Bacteroidaceae	Bacteroides	Bacteroides graminisolvens	0.000475379	0	0	0	0.00116756	0.000627384	0.000745971	0.0005799	0.000383437	0.000521969	0.000446841	0.000615665	0.000576488	0.00106674	0	0
A0A069D0I0	NA	no hit	-	S : Function unknown	-	no hit	-	-	-	no hit	Bacteria	Bacteroidetes	Bacteroidia	Bacteroidales	Bacteroidaceae	Bacteroides	Bacteroides graminisolvens	0	0	0	0	0	0	0	0	0.000130848	0	0.000118641	0	0	0	0	0
A0A069D0I5	NA	COG0546	poorly characterized	R : General function prediction only	Predicted phosphatases	TIGR01662	Unknown function	Enzymes of unknown specificity	HAD hydrolase, family IIIA	PF13419.2	Bacteria	Bacteroidetes	Bacteroidia	Bacteroidales	Bacteroidaceae	Bacteroides	Bacteroides graminisolvens	0	0	0	0	0	0	0	0	0	0	0	0	0.000150094	0	0	0
A0A069D0I6	NA	COG0013	information storage and processing	J : Translation	Alanyl-tRNA synthetase	TIGR00344	Protein synthesis	tRNA aminoacylation	alanine--tRNA ligase	PF01411.15	Bacteria	Bacteroidetes	Bacteroidia	Bacteroidales	Bacteroidaceae	Bacteroides	Bacteroides graminisolvens	0.000228208	0.00025621	0.000399831	0.00032021	0.000171646	0.000102213	0.000224724	0.000177914	0.000347513	0.000196853	0.000222634	0.000377208	0.000286009	0.00023635	0.000192592	0.00019114
A0A069D0I9	NA	COG0151	metabolism	F : Nucleotide	Phosphoribosylamine-glycine ligase	TIGR00877	Purines, pyrimidines, nucleosides, and nucleotides	Purine ribonucleotide biosynthesis	phosphoribosylamine--glycine ligase	PF01071.15	Bacteria	Bacteroidetes	Bacteroidia	Bacteroidales	Bacteroidaceae	Bacteroides	Bacteroides graminisolvens	0.000815082	0.000631398	0.000704758	0.000565712	0.000706018	0.000799435	0.00070856	0.000352717	0.000547414	0.00087836	0.00104302	0.00100365	0.000427554	0.000549839	0.000622099	0.000730592
A0A069D0J6	GT19	COG0763	cellular processes and signaling	M : Cell wall	Lipid A disaccharide synthetase	TIGR00215	Cell envelope	Biosynthesis and degradation of surface polysaccharides and lipopolysaccharides	lipid-A-disaccharide synthase	PF02684.11	Bacteria	Bacteroidetes	Bacteroidia	Bacteroidales	Bacteroidaceae	Bacteroides	Bacteroides graminisolvens	0	0	0	0	0	0	0	0	0	0.000174286	0.000188372	0	8.99e-05	0.000133699	0.000142194	0
A0A069D0J9	CE8	COG4677	metabolism	G : Carbohydrate	Pectin methylesterase	no hit	-	-	-	PF01095.15	Bacteria	Bacteroidetes	Bacteroidia	Bacteroidales	Bacteroidaceae	Bacteroides	Bacteroides graminisolvens	0	0	0	0	0	0.00016871	0	0.000173204	0.000140761	0.000125428	0.000135276	0	0	0	0	0
A0A069D0K0	NA	COG2239	metabolism	P : Inorganic ion	Mg/Co/Ni transporter MgtE (contains CBS domain)	TIGR00400	Transport and binding proteins	Cations and iron carrying compounds	magnesium transporter	PF01769.12	Bacteria	Bacteroidetes	Bacteroidia	Bacteroidales	Bacteroidaceae	Bacteroides	Bacteroides graminisolvens	0	0	0	0	0	0	0	0	0	8.33e-05	9.07e-05	0	0	0	0	0
A0A069D0K5	NA	no hit	-	S : Function unknown	-	no hit	-	-	-	PF15869.1	Bacteria	Bacteroidetes	Bacteroidia	Bacteroidales	Bacteroidaceae	Bacteroides	Bacteroides graminisolvens	0	0	0	0	0	0	0	0	0	0.0001177	0.000198312	0.00013847	0	0	0	0
A0A069D0K6	NA	COG4771	metabolism	P : Inorganic ion	Outer membrane receptor for ferrienterochelin and colicins	TIGR04056	Transport and binding proteins	Unknown substrate	TonB-linked outer membrane protein, SusC/RagA family	PF00593.20	Bacteria	Bacteroidetes	Bacteroidia	Bacteroidales	Bacteroidaceae	Bacteroides	Bacteroides graminisolvens	0.00139803	0.00144485	0.00107652	0.00115173	0.000933697	0.000975865	0.000868389	0.000635968	0.00082944	0.000821616	0.000955428	0.00149871	0.000502664	0.000653118	0.000725259	0.000781142
A0A069D0K7	NA	COG0479	metabolism	C : Energy production and conversion	Succinate dehydrogenase/fumarate reductase, Fe-S protein subunit	no hit	-	-	-	PF13085.2	Bacteria	Bacteroidetes	Bacteroidia	Bacteroidales	Bacteroidaceae	Bacteroides	Bacteroides graminisolvens	0.00117004	0.000955465	0.000988822	0.000908083	0.000462837	0.000568221	0.00075824	0.000679874	0.000858743	0.000940159	0.00079022	0.000886598	0.000714808	0.000928812	0.000729072	0.000709385
A0A069D0L0	NA	no hit	-	S : Function unknown	-	no hit	-	-	-	PF07980.7	Bacteria	Bacteroidetes	Bacteroidia	Bacteroidales	Bacteroidaceae	Bacteroides	Bacteroides graminisolvens	0	0	0	0	0	0	0	0	0	0	8.2e-05	8.9e-05	0	0	0	0
A0A069D0L9	NA	no hit	-	S : Function unknown	-	no hit	-	-	-	no hit	Bacteria	Bacteroidetes	Bacteroidia	Bacteroidales	Bacteroidaceae	Bacteroides	Bacteroides graminisolvens	0.000401205	0.000185438	0.0001757	0	0	0.000141484	0	0	0.000241022	0	0	0.000246799	0.000242055	0	0	0
A0A069D0M4	NA	no hit	-	S : Function unknown	-	no hit	-	-	-	PF08522.6	Bacteria	Bacteroidetes	Bacteroidia	Bacteroidales	Bacteroidaceae	Bacteroides	Bacteroides graminisolvens	0.000799395	0.000692873	0.00062253	0.000399332	0.00052616	0.000415007	0.000387674	0.000159609	0.00163845	0.00156399	0.001433	0.00122668	0.00104719	0.000887393	0.00078161	0.000843776
A0A069D0M9	CE7	COG3458	metabolism	Q : Secondary metabolites	Acetyl esterase (deacetylase)	no hit	-	-	-	PF05448.8	Bacteria	Bacteroidetes	Bacteroidia	Bacteroidales	Bacteroidaceae	Bacteroides	Bacteroides graminisolvens	0	0.000392999	0.000495324	0.000466504	0.000155831	0.000538867	0.000897368	0.000698105	0	0.000340585	0.000265578	0.000403445	0	0.000146746	0.000262528	0.000331726
A0A069D0N0	NA	COG1629	metabolism	P : Inorganic ion	Outer membrane receptor proteins, mostly Fe transport	TIGR04056	Transport and binding proteins	Unknown substrate	TonB-linked outer membrane protein, SusC/RagA family	PF13715.2	Bacteria	Bacteroidetes	Bacteroidia	Bacteroidales	Bacteroidaceae	Bacteroides	Bacteroides graminisolvens	0.000749583	0.00041828	0.000274696	0.000195645	0.000411713	0.000342183	0.000249768	0.000201251	0.00102575	0.000304876	0.000459905	0.000701889	0.000760381	0.000326646	0.000161668	0.000329102
A0A069D0N9	NA	no hit	-	S : Function unknown	-	no hit	-	-	-	PF16153.1	Bacteria	Bacteroidetes	Bacteroidia	Bacteroidales	Bacteroidaceae	Bacteroides	Bacteroides graminisolvens	0.00101137	0.00119397	0.00169689	0.00164013	0.00092194	0.0011254	0.00106871	0.00135024	0.00141648	0.00112337	0.00132741	0.00140598	0.000857116	0.000834507	0.0013256	0.00154454
A0A069D0P9	NA	COG2089	cellular processes and signaling	M : Cell wall	Sialic acid synthase	no hit	-	-	-	PF03102.10	Bacteria	Bacteroidetes	Bacteroidia	Bacteroidales	Bacteroidaceae	Bacteroides	Bacteroides graminisolvens	0.000123493	0.000182227	0	0	0	0.000154569	0	0.000172286	0.000198677	0.000257519	0.000122304	0.000222136	0.000196421	0.000245189	0.000183394	0.000141775
A0A069D0Q2	GH3	COG1472	metabolism	G : Carbohydrate	Beta-glucosidase-related glycosidases	no hit	-	-	-	PF00933.17	Bacteria	Bacteroidetes	Bacteroidia	Bacteroidales	Bacteroidaceae	Bacteroides	Bacteroides graminisolvens	0.000337531	0.000173577	0.000139334	0.000283546	0.00023953	0.000441028	0.000360453	0.000237938	0.000224801	0.000265256	0.000353349	0.000424958	6.65e-05	0.000248035	0.000234889	0.000197625
A0A069D0Q5	NA	COG1045	metabolism	E : Amino acid	Serine acetyltransferase	no hit	-	-	-	PF00132.20	Bacteria	Bacteroidetes	Bacteroidia	Bacteroidales	Bacteroidaceae	Bacteroides	Bacteroides graminisolvens	0	0.000141153	0.000220411	0.000222381	0.000224104	0	0.000314046	0	0.000149235	0.000181663	0.000192856	0.000311209	0.000113908	0.000129951	0.000287215	0.00021724
A0A069D0S0	NA	COG1053	metabolism	C : Energy production and conversion	Succinate dehydrogenase/fumarate reductase, flavoprotein subunit	no hit	-	-	-	PF00890.20	Bacteria	Bacteroidetes	Bacteroidia	Bacteroidales	Bacteroidaceae	Bacteroides	Bacteroides graminisolvens	0.000223926	0.000123411	0	0	0.000290059	0.000210467	0.000219556	0	0	0.000219268	0	0	0.000102771	0	0	0
A0A069D0S2	NA	no hit	-	S : Function unknown	-	no hit	-	-	-	no hit	Bacteria	Bacteroidetes	Bacteroidia	Bacteroidales	Bacteroidaceae	Bacteroides	Bacteroides graminisolvens	0	0	0	0	0	0	0	0	0	0	0	0	0.000756859	0	0	0
A0A069D0T3	NA	no hit	-	S : Function unknown	-	no hit	-	-	-	PF07980.7	Bacteria	Bacteroidetes	Bacteroidia	Bacteroidales	Bacteroidaceae	Bacteroides	Bacteroides graminisolvens	0.00147923	0.00162109	0.00172913	0.00170272	0.000847972	0.000833505	0.00103583	0.000824275	0.000938704	0.00169392	0.00203393	0.00225897	0.000766395	0.0015695	0.00181335	0.00174321
A0A069D0T5	NA	COG1629	metabolism	P : Inorganic ion	Outer membrane receptor proteins, mostly Fe transport	no hit	-	-	-	PF00593.20	Bacteria	Bacteroidetes	Bacteroidia	Bacteroidales	Bacteroidaceae	Bacteroides	Bacteroides graminisolvens	0.00103272	0.000659321	0.000391885	0.000453683	0.00074869	0.000610607	0.000290124	0.000313127	0.000425306	0.000158184	0.000148708	0.000282973	0.000406685	9.66e-05	0	0
A0A069D0U2	NA	COG0427	metabolism	C : Energy production and conversion	Acetyl-CoA hydrolase	TIGR03458	-	-	succinate CoA transferase	PF13336.2	Bacteria	Bacteroidetes	Bacteroidia	Bacteroidales	Bacteroidaceae	Bacteroides	Bacteroides graminisolvens	0.00037091	0.000397272	0.000333032	0.000302055	0.000399279	0.000286458	0.000407407	0.00034759	0.00051098	0.000532316	0.000594824	0.000670409	0.000540256	0.000575497	0.000512789	0.000547294
A0A069D0U4	NA	no hit	-	S : Function unknown	-	no hit	-	-	-	no hit	Bacteria	Bacteroidetes	Bacteroidia	Bacteroidales	Bacteroidaceae	Bacteroides	Bacteroides graminisolvens	0.000153043	0.000129916	0	0	0.000206812	0	0	0	0	0	0	0	0	0	0	0
A0A069D0U9	NA	COG0545	cellular processes and signaling	O : Posttranslational modification	FKBP-type peptidyl-prolyl cis-trans isomerases 1	no hit	-	-	-	PF00254.24	Bacteria	Bacteroidetes	Bacteroidia	Bacteroidales	Bacteroidaceae	Bacteroides	Bacteroides graminisolvens	0.00131476	0.00102443	0.000928716	0.00138914	0.00195493	0.00198136	0.00227183	0.00187638	0.00202673	0.00175954	0.00227014	0.00201651	0.00169919	0.00183493	0.00215392	0.00248873
A0A069D0V1	NA	COG0858	information storage and processing	J : Translation	Ribosome-binding factor A	no hit	-	-	-	PF02033.14	Bacteria	Bacteroidetes	Bacteroidia	Bacteroidales	Bacteroidaceae	Bacteroides	Bacteroides graminisolvens	0	0	0	0	0.00123386	0.000799864	0	0	0	0	0	0	0	0	0	0
A0A069D0V2	NA	COG0192	metabolism	H : Coenzyme	S-adenosylmethionine synthetase	TIGR01034	Central intermediary metabolism	Other	methionine adenosyltransferase	PF02773.12	Bacteria	Bacteroidetes	Bacteroidia	Bacteroidales	Bacteroidaceae	Bacteroides	Bacteroides graminisolvens	0.000160652	0.00013286	0.000249045	0.000254091	0.000283928	0	0.000156386	0	0.000263868	0.000121513	0.000122195	0.000100523	0.000140676	0.000132332	0.000105822	0
A0A069D0V5	NA	no hit	-	S : Function unknown	-	no hit	-	-	-	no hit	Bacteria	Bacteroidetes	Bacteroidia	Bacteroidales	Bacteroidaceae	Bacteroides	Bacteroides graminisolvens	0	0	0.000177732	0	0	0	0	0	0	0.000139743	0	0	0.000120348	0.000126908	0.000145902	0.000166153
A0A069D0W5	NA	no hit	-	S : Function unknown	-	no hit	-	-	-	PF11028.4	Bacteria	Bacteroidetes	Bacteroidia	Bacteroidales	Bacteroidaceae	Bacteroides	Bacteroides graminisolvens	6.81e-05	7.57e-05	6.51e-05	5.98e-05	6.02e-05	4.81e-05	0.000140795	5.36e-05	7.34e-05	3.34e-05	3.85e-05	9.86e-05	8.7e-05	3.23e-05	0	4.41e-05
A0A069D0W7	GH42	COG1874	metabolism	G : Carbohydrate	Beta-galactosidase	no hit	-	-	-	PF02449.11	Bacteria	Bacteroidetes	Bacteroidia	Bacteroidales	Bacteroidaceae	Bacteroides	Bacteroides graminisolvens	0.000353428	0.000361687	0.000434254	0.000312821	0.000192273	0.000102413	0.00013125	0.000192316	0.000114668	0.000274993	0.000343885	0.000256638	0.000110581	0.000205461	0.00017772	0.000187685
A0A069D0X1	NA	COG0499	metabolism	H : Coenzyme	S-adenosylhomocysteine hydrolase	TIGR00936	Energy metabolism	Amino acids and amines	adenosylhomocysteinase	PF05221.13	Bacteria	Bacteroidetes	Bacteroidia	Bacteroidales	Bacteroidaceae	Bacteroides	Bacteroides graminisolvens	0	0	0	0	0	0.000113307	0.000133062	0.000193338	0.000287331	0.000136264	0.00020395	0.000166493	9.51e-05	0.000153127	0	9.96e-05
A0A069D0X4	NA	COG0031	metabolism	E : Amino acid	Cysteine synthase	TIGR01139	Amino acid biosynthesis	Serine family	cysteine synthase A	PF00291.21	Bacteria	Bacteroidetes	Bacteroidia	Bacteroidales	Bacteroidaceae	Bacteroides	Bacteroides graminisolvens	0.00151844	0.0011604	0.0093433	0.00723423	0.00273076	0.00215122	0.00317176	0.00200061	0.00239698	0.00183631	0.00186741	0.0023014	0.00239582	0.00162145	0.00192069	0.00206203
A0A069D0Z0	NA	no hit	-	S : Function unknown	-	TIGR02046	Energy metabolism	TCA cycle	succinate dehydrogenase (or fumarate reductase) cytochrome b subunit, b558 family	no hit	Bacteria	Bacteroidetes	Bacteroidia	Bacteroidales	Bacteroidaceae	Bacteroides	Bacteroides graminisolvens	0	0	0	0	0	0	0	0	0.000246918	0	0	0	0.000245894	0	0	0
A0A069D0Z3	NA	COG1217	cellular processes and signaling	T : Signal transduction	Predicted membrane GTPase involved in stress response	TIGR01394	Regulatory functions	Other	GTP-binding protein TypA/BipA	PF00009.23	Bacteria	Bacteroidetes	Bacteroidia	Bacteroidales	Bacteroidaceae	Bacteroides	Bacteroides graminisolvens	0	0	0	0	0.000111865	0	0	0	7.45e-05	0	0.000168241	0.000151316	8.06e-05	0	0	0
A0A069D0Z5	NA	no hit	-	S : Function unknown	-	no hit	-	-	-	PF14289.2	Bacteria	Bacteroidetes	Bacteroidia	Bacteroidales	Bacteroidaceae	Bacteroides	Bacteroides graminisolvens	0	0	0	0	0	0	0	0	0	0.00026913	0	0	0	0.000261627	0	0
A0A069D0Z6	NA	COG0187	information storage and processing	L : Replication	Type IIA topoisomerase (DNA gyrase/topo II, topoisomerase IV), B subunit	no hit	-	-	-	PF00204.21	Bacteria	Bacteroidetes	Bacteroidia	Bacteroidales	Bacteroidaceae	Bacteroides	Bacteroides graminisolvens	0	0	0	0	0	0	0	0	0	0	0	0	8.66e-05	0	0	0
A0A069D0Z7	NA	COG1014	metabolism	C : Energy production and conversion	Pyruvate:ferredoxin oxidoreductase and related 2-oxoacid:ferredoxin oxidoreductases, gamma subunit	no hit	-	-	-	PF01558.14	Bacteria	Bacteroidetes	Bacteroidia	Bacteroidales	Bacteroidaceae	Bacteroides	Bacteroides graminisolvens	0.00108873	0.00131475	0.00108638	0.00102615	0.00113099	0.00116305	0.000869905	0.00058361	0.00173103	0.00152655	0.00148524	0.00161628	0.00139758	0.00122607	0.00100277	0.00116233
A0A069D0Z9	NA	COG0469	metabolism	G : Carbohydrate	Pyruvate kinase	no hit	-	-	-	PF00224.17	Bacteria	Bacteroidetes	Bacteroidia	Bacteroidales	Bacteroidaceae	Bacteroides	Bacteroides graminisolvens	0.00106078	0.000901349	0.000858648	0.000601694	0.000795363	0.0002851	0.00050244	0.000315185	0.00106217	0.000613705	0.000670611	0.000765598	0.000681794	0.000406615	0.000543307	0.000643213
A0A069D103	NA	no hit	-	S : Function unknown	-	no hit	-	-	-	no hit	Bacteria	Bacteroidetes	Bacteroidia	Bacteroidales	Bacteroidaceae	Bacteroides	Bacteroides graminisolvens	0	0	0.000249007	0	0.000504256	0	0	0.00039151	0.000228827	0	0.000574057	0.000503736	0.000284985	0	0.000315628	0
A0A069D117	NA	COG0545	cellular processes and signaling	O : Posttranslational modification	FKBP-type peptidyl-prolyl cis-trans isomerases 1	no hit	-	-	-	PF00254.24	Bacteria	Bacteroidetes	Bacteroidia	Bacteroidales	Bacteroidaceae	Bacteroides	Bacteroides graminisolvens	0	0	0	0	0	0	0	0.000297423	0	0.000191577	0	0.000253166	0.000230607	0.000523989	0.000538588	0.000599324
A0A069D122	NA	COG4485	poorly characterized	S : Function unknown	Predicted membrane protein	no hit	-	-	-	PF09586.6	Bacteria	Bacteroidetes	Bacteroidia	Bacteroidales	Bacteroidaceae	Bacteroides	Bacteroides graminisolvens	0	0	0	0	0	0	0	0	0	0	0	0	0	0	0	0.000100623
A0A069D129	NA	COG0285	metabolism	H : Coenzyme	Folylpolyglutamate synthase	TIGR01499	Biosynthesis of cofactors, prosthetic groups, and carriers	Folic acid	bifunctional protein FolC	PF08245.8	Bacteria	Bacteroidetes	Bacteroidia	Bacteroidales	Bacteroidaceae	Bacteroides	Bacteroides graminisolvens	0	0	0	0	0	0	0	0	8.42e-05	0	0	0	0	0	0	0
A0A069D134	NA	COG0143	information storage and processing	J : Translation	Methionyl-tRNA synthetase	TIGR00398	Protein synthesis	tRNA aminoacylation	methionine--tRNA ligase	PF09334.7	Bacteria	Bacteroidetes	Bacteroidia	Bacteroidales	Bacteroidaceae	Bacteroides	Bacteroides graminisolvens	0	0	0	0	0.000144816	0	0	0	9.87e-05	0.000114568	0.00010133	0.000105099	6.61e-05	5.29e-05	0	7.22e-05
A0A069D139	NA	COG0156	metabolism	H : Coenzyme	7-keto-8-aminopelargonate synthetase and related enzymes	TIGR01822	Energy metabolism	Amino acids and amines	glycine C-acetyltransferase	PF00155.17	Bacteria	Bacteroidetes	Bacteroidia	Bacteroidales	Bacteroidaceae	Bacteroides	Bacteroides graminisolvens	0.000551528	0.000746065	0.00075356	0.000483061	0.000588213	0.000451252	0.000481819	0	0.000428543	0.000547969	0.000740507	0.0007126	0.000195138	0.000369991	0.000332901	0.000535856
A0A069D140	NA	COG0318	metabolism	I : Lipid	Acyl-CoA synthetases (AMP-forming)/AMP-acid ligases II	no hit	-	-	-	PF00501.24	Bacteria	Bacteroidetes	Bacteroidia	Bacteroidales	Bacteroidaceae	Bacteroides	Bacteroides graminisolvens	0.000112112	7.69e-05	8.84e-05	0	0	0	0	0	8.13e-05	6.77e-05	7.71e-05	8.51e-05	6.2e-05	0	0	0
A0A069D144	NA	COG2884	cellular processes and signaling	D : Cell cycle control	Predicted ATPase involved in cell division	no hit	-	-	-	PF00005.23	Bacteria	Bacteroidetes	Bacteroidia	Bacteroidales	Bacteroidaceae	Bacteroides	Bacteroides graminisolvens	0.000343943	0.000239113	0.000288786	0	0.000420214	0.000304908	0	0.000336736	0.000334507	0	0	0	0.000291099	0	0	0
A0A069D148	NA	COG0788	metabolism	F : Nucleotide	Formyltetrahydrofolate hydrolase	TIGR00655	Purines, pyrimidines, nucleosides, and nucleotides	Purine ribonucleotide biosynthesis	formyltetrahydrofolate deformylase	PF00551.15	Bacteria	Bacteroidetes	Bacteroidia	Bacteroidales	Bacteroidaceae	Bacteroides	Bacteroides graminisolvens	0	0	0.000179808	0.000190138	0.00023594	0	0	0	0.000157117	0.000139251	0.000149005	0.000167071	0.000123483	0.000136815	0	0.000165568
A0A069D149	GH105	COG4225	poorly characterized	R : General function prediction only	Predicted unsaturated glucuronyl hydrolase involved in regulation of bacterial surface properties, and related proteins	no hit	-	-	-	PF07470.9	Bacteria	Bacteroidetes	Bacteroidia	Bacteroidales	Bacteroidaceae	Bacteroides	Bacteroides graminisolvens	0	0.00014881	0	0	0	0	0	0	9.62e-05	0.000353683	0.000225534	0	0.000128406	0.000191036	0.000197204	0.000171544
A0A069D152	GH43_7-CBM13	COG3507	metabolism	G : Carbohydrate	Beta-xylosidase	no hit	-	-	-	PF04616.10	Bacteria	Bacteroidetes	Bacteroidia	Bacteroidales	Bacteroidaceae	Bacteroides	Bacteroides graminisolvens	9.09e-05	0.000150356	0.000209094	0.00026429	0	0.000113789	0.000157051	0.000126832	0.000320961	0.000584413	0.000411689	0.000567345	0.000144589	0.000299598	0.000290093	0.000548942
A0A069D156	NA	no hit	-	S : Function unknown	-	no hit	-	-	-	PF07980.7	Bacteria	Bacteroidetes	Bacteroidia	Bacteroidales	Bacteroidaceae	Bacteroides	Bacteroides graminisolvens	0.00137458	0.00148817	0.00131366	0.00144181	0.000684625	0.00111853	0.00157183	0.00156569	0.00164532	0.00212696	0.00197643	0.0021256	0.00113722	0.00180384	0.0019031	0.00201627
A0A069D159	NA	COG1013	metabolism	C : Energy production and conversion	Pyruvate:ferredoxin oxidoreductase and related 2-oxoacid:ferredoxin oxidoreductases, beta subunit	no hit	-	-	-	PF02775.17	Bacteria	Bacteroidetes	Bacteroidia	Bacteroidales	Bacteroidaceae	Bacteroides	Bacteroides graminisolvens	0.000548109	0.000624503	0.000640425	0.000559835	0.000245308	0.000475642	0.000602044	0.0003404	0.000777536	0.00111798	0.000944635	0.0010732	0.000531933	0.000551656	0.000809163	0.000915191
A0A069D161	NA	COG1825	information storage and processing	J : Translation	Ribosomal protein L25 (general stress protein Ctc)	TIGR00731	Protein synthesis	Ribosomal proteins: synthesis and modification	ribosomal protein bL25, Ctc-form	PF01386.15	Bacteria	Bacteroidetes	Bacteroidia	Bacteroidales	Bacteroidaceae	Bacteroides	Bacteroides graminisolvens	0.00119045	0.00108129	0.00169507	0.00173316	0.00144364	0.00164619	0.00129702	0.00127569	0.00105922	0.00094716	0.00125575	0.00105634	0.000873299	0.00113648	0.000581559	0.000836221
A0A069D164	NA	COG0404	metabolism	E : Amino acid	Glycine cleavage system T protein (aminomethyltransferase)	TIGR00528	Energy metabolism	Amino acids and amines	glycine cleavage system T protein	PF01571.17	Bacteria	Bacteroidetes	Bacteroidia	Bacteroidales	Bacteroidaceae	Bacteroides	Bacteroides graminisolvens	0.000170479	0.00019417	0.00020552	0.000149582	0.00037123	0.00014801	0.00026011	0.000218272	0.000216222	0.000296135	0.00038835	0.000212906	8.94e-05	0.000214428	0.000290867	0.000363605
A0A069D166	NA	COG0526	cellular processes and signaling	O : Posttranslational modification	Thiol-disulfide isomerase and thioredoxins	no hit	-	-	-	PF00578.17	Bacteria	Bacteroidetes	Bacteroidia	Bacteroidales	Bacteroidaceae	Bacteroides	Bacteroides graminisolvens	0.000199008	0	0.00173302	0.00185359	0.000530946	0.000485538	0.000329082	0.000285644	0.00092023	0.000642214	0.000694031	0.000466104	0.00100664	0.000738658	0.000551965	0.000603759
A0A069D168	NA	COG0550	information storage and processing	L : Replication	Topoisomerase IA	TIGR01051	DNA metabolism	DNA replication, recombination, and repair	DNA topoisomerase I	PF01131.16	Bacteria	Bacteroidetes	Bacteroidia	Bacteroidales	Bacteroidaceae	Bacteroides	Bacteroides graminisolvens	0.000155153	8.26e-05	9.95e-05	6.31e-05	0.000193151	0.000208392	0.000130628	0.000204621	0.000107197	0.000179236	6.49e-05	0.000108839	8.16e-05	9.08e-05	4.82e-05	0.000110639
A0A069D169	NA	COG0148	metabolism	G : Carbohydrate	Enolase	TIGR01060	Energy metabolism	Glycolysis/gluconeogenesis	phosphopyruvate hydratase	PF00113.18	Bacteria	Bacteroidetes	Bacteroidia	Bacteroidales	Bacteroidaceae	Bacteroides	Bacteroides graminisolvens	0.00263535	0.00251213	0.00383346	0.00419705	0.00248599	0.00213435	0.00189567	0.00232146	0.00163579	0.00274523	0.00275185	0.00276455	0.00130463	0.00198626	0.00216742	0.00269426
A0A069D173	NA	COG3254	poorly characterized	S : Function unknown	Uncharacterized conserved protein	TIGR02625	Energy metabolism	Sugars	L-rhamnose mutarotase	PF05336.9	Bacteria	Bacteroidetes	Bacteroidia	Bacteroidales	Bacteroidaceae	Bacteroides	Bacteroides graminisolvens	0	0	0	0	0	0	0	0	0	0.000357364	0	0	0	0.000373609	0.000397021	0
A0A069D180	NA	COG0265	cellular processes and signaling	O : Posttranslational modification	Trypsin-like serine proteases, typically periplasmic, contain C-terminal PDZ domain	no hit	-	-	-	PF13365.2	Bacteria	Bacteroidetes	Bacteroidia	Bacteroidales	Bacteroidaceae	Bacteroides	Bacteroides graminisolvens	0.00145618	0.0017297	0.00184538	0.00192553	0.000952229	0.00131544	0.00109143	0.000933044	0.0014248	0.00122901	0.00156089	0.00148785	0.00119082	0.00143319	0.00119596	0.00132732
A0A069D184	NA	COG5010	cellular processes and signaling	U : Intracellular trafficking	Flp pilus assembly protein TadD, contains TPR repeats	no hit	-	-	-	PF07719.13,PF13414.2	Bacteria	Bacteroidetes	Bacteroidia	Bacteroidales	Bacteroidaceae	Bacteroides	Bacteroides graminisolvens	0.00298438	0.00303861	0.00430579	0.00506894	0.00304492	0.00312428	0.00324658	0.00328552	0.00279016	0.00337592	0.00329433	0.00332114	0.00224957	0.00278289	0.00377539	0.00361674
A0A069D1A8	NA	COG4948	cellular processes and signaling	M : Cell wall	L-alanine-DL-glutamate epimerase and related enzymes of enolase superfamily	TIGR01409	Protein fate	Protein and peptide secretion and trafficking	Tat (twin-arginine translocation) pathway signal sequence	PF13378.2	Bacteria	Bacteroidetes	Bacteroidia	Bacteroidales	Bacteroidaceae	Bacteroides	Bacteroides graminisolvens	0	0	0	0	0	0	0	0	0	0.000143006	0	0	9.1e-05	0.000132303	0	0
A0A069D1A9	NA	COG0167	metabolism	F : Nucleotide	Dihydroorotate dehydrogenase	no hit	-	-	-	PF01180.17	Bacteria	Bacteroidetes	Bacteroidia	Bacteroidales	Bacteroidaceae	Bacteroides	Bacteroides graminisolvens	0.000548048	0.000213056	0.000402182	0.000328263	0.00040071	0.000324913	0.000476307	0.000166887	0.00053717	0.000606279	0.00050662	0.000432297	0.000354368	0.000299581	0.000330751	0.000392102
A0A069D1B0	NA	COG1109	metabolism	G : Carbohydrate	Phosphomannomutase	no hit	-	-	-	PF02878.12	Bacteria	Bacteroidetes	Bacteroidia	Bacteroidales	Bacteroidaceae	Bacteroides	Bacteroides graminisolvens	0.00170314	0.00164602	0.00165966	0.00164961	0.000996008	0.000920776	0.000939166	0.00105072	0.00108034	0.00158722	0.00162601	0.00157933	0.00108578	0.00108119	0.0011501	0.00120161
A0A069D1B2	NA	COG0704	metabolism	P : Inorganic ion	Phosphate uptake regulator	TIGR02135	Regulatory functions	Other	phosphate transport system regulatory protein PhoU	PF01895.15	Bacteria	Bacteroidetes	Bacteroidia	Bacteroidales	Bacteroidaceae	Bacteroides	Bacteroides graminisolvens	0.0014268	0.00147687	0.00138114	0.00142373	0.00101461	0.0013237	0.0015378	0.00106487	0.000951255	0.000842679	0.000665093	0.000757561	0.000900515	0.000492883	0.00051976	0.000660408
A0A069D1B3	NA	COG0566	information storage and processing	J : Translation	rRNA methylases	TIGR00186	Protein synthesis	tRNA and rRNA base modification	RNA methyltransferase, TrmH family, group 3	PF00588.15	Bacteria	Bacteroidetes	Bacteroidia	Bacteroidales	Bacteroidaceae	Bacteroides	Bacteroides graminisolvens	0	0	0	0	0	0	0	0	0.000326898	0.000149863	0.000172913	0	0.000187919	0.000144818	0	0
A0A069D1B4	NA	COG0686	metabolism	E : Amino acid	Alanine dehydrogenase	no hit	-	-	-	PF05222.11	Bacteria	Bacteroidetes	Bacteroidia	Bacteroidales	Bacteroidaceae	Bacteroides	Bacteroides graminisolvens	0	0	0.000882842	0	0	0.000971485	0.00114191	0.00108384	0	0	0	0	0	0	0	0
A0A069D1B6	NA	no hit	-	S : Function unknown	-	no hit	-	-	-	no hit	Bacteria	Bacteroidetes	Bacteroidia	Bacteroidales	Bacteroidaceae	Bacteroides	Bacteroides graminisolvens	0.000143027	0.000127506	0	0	0	0.000161425	0	0	0.000134807	0.000112284	0.000131762	0	0	0	0	0
A0A069D1B8	NA	COG0592	information storage and processing	L : Replication	DNA polymerase sliding clamp subunit (PCNA homolog)	TIGR00663	DNA metabolism	DNA replication, recombination, and repair	DNA polymerase III, beta subunit	PF00712.15	Bacteria	Bacteroidetes	Bacteroidia	Bacteroidales	Bacteroidaceae	Bacteroides	Bacteroides graminisolvens	0.000823215	0.000866015	0.000757752	0.00104654	0.00106332	0.000905744	0.00073168	0.000462834	0.000998169	0.000993592	0.00115996	0.000923094	0.00107824	0.000806332	0.000645313	0.00056233
A0A069D1B9	NA	no hit	-	S : Function unknown	-	no hit	-	-	-	PF13505.2	Bacteria	Bacteroidetes	Bacteroidia	Bacteroidales	Bacteroidaceae	Bacteroides	Bacteroides graminisolvens	0	0	0	0	0	0	0	0	0	0.000181966	0.000124255	0.000181652	0	0	0	0
A0A069D1C3	GH97	no hit	-	S : Function unknown	-	no hit	-	-	-	PF10566.5	Bacteria	Bacteroidetes	Bacteroidia	Bacteroidales	Bacteroidaceae	Bacteroides	Bacteroides graminisolvens	0.00012104	0.000274279	0.000251914	0.000162404	0.000201525	0.000187793	0.00018039	0.000141793	0.00025374	0.000433295	0.00045903	0.000491671	0.000121544	0.000224418	0.000299671	0.000244525
A0A069D1C5	NA	COG0019	metabolism	E : Amino acid	Diaminopimelate decarboxylase	TIGR01048	Amino acid biosynthesis	Aspartate family	diaminopimelate decarboxylase	PF02784.12	Bacteria	Bacteroidetes	Bacteroidia	Bacteroidales	Bacteroidaceae	Bacteroides	Bacteroides graminisolvens	0.000246573	0.00011116	0.000263302	0.000140623	0.000174498	0	0	0	0.000149884	0.000239934	0.000296121	0.000246816	0.000210058	0.000150598	0.000215053	0.000127745
A0A069D1C7	NA	COG4783	poorly characterized	R : General function prediction only	Putative Zn-dependent protease, contains TPR repeats	no hit	-	-	-	PF01435.14	Bacteria	Bacteroidetes	Bacteroidia	Bacteroidales	Bacteroidaceae	Bacteroides	Bacteroides graminisolvens	0.000392296	0.000239777	0.000308301	0	0.0009887	0.00106165	0.00131863	0.00164982	0.000877557	0.00133893	0.00166118	0.00196384	0.00111334	0.00177103	0.00215163	0.00195401
A0A069D1C9	NA	COG1741	poorly characterized	R : General function prediction only	Pirin-related protein	no hit	-	-	-	PF02678.12	Bacteria	Bacteroidetes	Bacteroidia	Bacteroidales	Bacteroidaceae	Bacteroides	Bacteroides graminisolvens	0	0.000214237	0.000253672	0.000337523	0	0.000995391	0.000823602	0.000784038	0.000330567	0.000341916	0.000351718	0.000407667	0.000291564	0.000320308	0.000253551	0.000249005
A0A069D1D0	GH43_2-CBM6	COG3507	metabolism	G : Carbohydrate	Beta-xylosidase	no hit	-	-	-	PF04616.10	Bacteria	Bacteroidetes	Bacteroidia	Bacteroidales	Bacteroidaceae	Bacteroides	Bacteroides graminisolvens	0	0.000191659	0	0	0	0.000181977	0.000213623	0.000186754	0.00038559	0.000523309	0.000626289	0.000584203	0.000268543	0.000466379	0.000590346	0.000393927
A0A069D1D4	NA	COG1396	information storage and processing	K : Transcription	Predicted transcriptional regulators	no hit	-	-	-	PF01381.18	Bacteria	Bacteroidetes	Bacteroidia	Bacteroidales	Bacteroidaceae	Bacteroides	Bacteroides graminisolvens	0.00025234	0.000714503	0.000677559	0.000539681	0.000589706	0.000724144	0.000926746	0.000882158	0.000528148	0.000617637	0.000719855	0.00064731	0.000582341	0.000182309	0.000415253	0.000252436
A0A069D1D5	CE6-CE1	COG2382	metabolism	P : Inorganic ion	Enterochelin esterase and related enzymes	no hit	-	-	-	PF00756.16	Bacteria	Bacteroidetes	Bacteroidia	Bacteroidales	Bacteroidaceae	Bacteroides	Bacteroides graminisolvens	0.000286787	0.000469251	0.000316478	0.000250378	0.000172586	0.000111693	0.000206324	0.000239488	0.000468772	0.000651444	0.000618418	0.000655493	0.000273061	0.000418618	0.000549588	0.000642934
A0A069D1D8	CE1	COG0627	poorly characterized	R : General function prediction only	Predicted esterase	no hit	-	-	-	PF00756.16	Bacteria	Bacteroidetes	Bacteroidia	Bacteroidales	Bacteroidaceae	Bacteroides	Bacteroides graminisolvens	0.000671785	0.000959982	0.000942969	0.000872994	0	0.000466781	0.000476856	0.000522997	0.00127599	0.00142444	0.0014731	0.0015591	0.000769994	0.000859426	0.00121015	0.00127468
A0A069D1E1	NA	no hit	-	S : Function unknown	-	no hit	-	-	-	no hit	Bacteria	Bacteroidetes	Bacteroidia	Bacteroidales	Bacteroidaceae	Bacteroides	Bacteroides graminisolvens	0.000288707	0	0	0	0	0.000361358	0.000475335	0	0	0.000268652	0.000273356	0	0	0.000242667	0	0.000331446
A0A069D1E7	NA	COG0184	information storage and processing	J : Translation	Ribosomal protein S15P/S13E	TIGR00952	Protein synthesis	Ribosomal proteins: synthesis and modification	ribosomal protein uS15	PF00312.18	Bacteria	Bacteroidetes	Bacteroidia	Bacteroidales	Bacteroidaceae	Bacteroides	Bacteroides graminisolvens	0.000531932	0.000472951	0.000545576	0.000606733	0.000928861	0.00060091	0.000836286	0.000857802	0.000752649	0.000444351	0.00091735	0	0.000622663	0.000705601	0	0
A0A069D1E8	NA	no hit	-	S : Function unknown	-	no hit	-	-	-	no hit	Bacteria	Bacteroidetes	Bacteroidia	Bacteroidales	Bacteroidaceae	Bacteroides	Bacteroides graminisolvens	0	0	0.00178308	0.00205641	0	0	0.0003975	0	0.00133018	0	0	0	0.00138458	0	0	0
A0A069D1F2	NA	COG0674	metabolism	C : Energy production and conversion	Pyruvate:ferredoxin oxidoreductase and related 2-oxoacid:ferredoxin oxidoreductases, alpha subunit	no hit	-	-	-	PF01855.15	Bacteria	Bacteroidetes	Bacteroidia	Bacteroidales	Bacteroidaceae	Bacteroides	Bacteroides graminisolvens	0.000996922	0.00114194	0.00124557	0.00098781	0.00096172	0.000923819	0.00107258	0.000815198	0.00126346	0.00140223	0.00154249	0.00199023	0.000841178	0.00101694	0.00118257	0.0010054
A0A069D1G0	NA	COG1629	metabolism	P : Inorganic ion	Outer membrane receptor proteins, mostly Fe transport	no hit	-	-	-	no hit	Bacteria	Bacteroidetes	Bacteroidia	Bacteroidales	Bacteroidaceae	Bacteroides	Bacteroides graminisolvens	0.000126043	0.000187503	0	0	0	0.000157821	0.000219556	0.000175844	0.000163989	0	0	0.000137244	0	0	0	0.000146696
A0A069D1G1	NA	COG1462	cellular processes and signaling	M : Cell wall	Uncharacterized protein involved in formation of curli polymers	no hit	-	-	-	PF03783.10	Bacteria	Bacteroidetes	Bacteroidia	Bacteroidales	Bacteroidaceae	Bacteroides	Bacteroides graminisolvens	0.000352649	0.00036343	0.000652319	0.000727068	0.000375962	0.000519535	0.000615918	0.000765011	0.00100515	0.000936711	0.00120007	0.00142997	0.000632812	0.000666981	0.000810746	0.000621847
A0A069D1G3	NA	COG1629	metabolism	P : Inorganic ion	Outer membrane receptor proteins, mostly Fe transport	TIGR04056	Transport and binding proteins	Unknown substrate	TonB-linked outer membrane protein, SusC/RagA family	PF07715.11	Bacteria	Bacteroidetes	Bacteroidia	Bacteroidales	Bacteroidaceae	Bacteroides	Bacteroides graminisolvens	0	0	5.32e-05	0	0	0	0	0	0	0	0	0	0	0	4.3e-05	0
A0A069D1H2	GH20	COG3525	metabolism	G : Carbohydrate	N-acetyl-beta-hexosaminidase	no hit	-	-	-	PF00728.18	Bacteria	Bacteroidetes	Bacteroidia	Bacteroidales	Bacteroidaceae	Bacteroides	Bacteroides graminisolvens	0.000105348	7.79e-05	9.57e-05	0.000105009	0	0.000109946	0	7.36e-05	8.93e-05	9.18e-05	9.99e-05	0.000169343	0	5.01e-05	0	0
A0A069D1H3	NA	COG1253	poorly characterized	R : General function prediction only	Hemolysins and related proteins containing CBS domains	TIGR03520	-	-	gliding motility-associated protein GldE	PF01595.16	Bacteria	Bacteroidetes	Bacteroidia	Bacteroidales	Bacteroidaceae	Bacteroides	Bacteroides graminisolvens	0	0	0	0	0	0	0	0	0	0	0	0	7.22e-05	0	0	0
A0A069D1H4	NA	COG1190	information storage and processing	J : Translation	Lysyl-tRNA synthetase (class II)	TIGR00499	Protein synthesis	tRNA aminoacylation	lysine--tRNA ligase	PF00152.16	Bacteria	Bacteroidetes	Bacteroidia	Bacteroidales	Bacteroidaceae	Bacteroides	Bacteroides graminisolvens	0.000183758	0.00011755	8.43e-05	0.000141536	0.000112997	0.000225333	0.000210786	0	0.00016935	0.000136295	0.000215988	0.000316945	7.54e-05	0.000249931	0.000105105	0
A0A069D1I6	NA	COG0209	metabolism	F : Nucleotide	Ribonucleotide reductase, alpha subunit	TIGR02504	Purines, pyrimidines, nucleosides, and nucleotides	2'-Deoxyribonucleotide metabolism	ribonucleoside-diphosphate reductase, adenosylcobalamin-dependent	PF02867.11	Bacteria	Bacteroidetes	Bacteroidia	Bacteroidales	Bacteroidaceae	Bacteroides	Bacteroides graminisolvens	0.000531375	0.000597071	0.000509618	0.00042093	0.000316445	0.000315741	0.000396503	0.000176558	0.000447477	0.000670076	0.000482072	0.000649039	0.000491099	0.000331712	0.000252444	0.000211828
A0A069D1J1	NA	COG1803	metabolism	G : Carbohydrate	Methylglyoxal synthase	no hit	-	-	-	PF02142.18	Bacteria	Bacteroidetes	Bacteroidia	Bacteroidales	Bacteroidaceae	Bacteroides	Bacteroides graminisolvens	0	0	0	0	0.000568382	0.000515961	0.000526471	0.000338632	0	0	0	0	0	0	0	0
A0A069D1J2	NA	COG1875	cellular processes and signaling	T : Signal transduction	Predicted ATPase related to phosphate starvation-inducible protein PhoH	no hit	-	-	-	PF02562.12	Bacteria	Bacteroidetes	Bacteroidia	Bacteroidales	Bacteroidaceae	Bacteroides	Bacteroides graminisolvens	0.00110609	0.00114843	0.00166481	0.00165899	0.00090177	0.00076821	0.00130655	0.000949485	0.000863669	0.00163989	0.00185066	0.00181788	0.000617844	0.0013146	0.00163141	0.00162629
A0A069D1J3	NA	no hit	-	S : Function unknown	-	no hit	-	-	-	no hit	Bacteria	Bacteroidetes	Bacteroidia	Bacteroidales	Bacteroidaceae	Bacteroides	Bacteroides graminisolvens	0	0	0	0	0	0	0	0	0	0.000250299	0.000351642	0.000300306	0	0.000245919	0	0.000470015
A0A069D1J5	NA	COG0324	information storage and processing	J : Translation	tRNA delta(2)-isopentenylpyrophosphate transferase	TIGR00174	Protein synthesis	tRNA and rRNA base modification	tRNA dimethylallyltransferase	PF01715.13	Bacteria	Bacteroidetes	Bacteroidia	Bacteroidales	Bacteroidaceae	Bacteroides	Bacteroides graminisolvens	0.000156244	0	0	0	0	0	0	0	0	0.00012266	0	0	0	0.000118531	0	0
A0A069D1J6	NA	COG0497	information storage and processing	L : Replication	ATPase involved in DNA repair	TIGR00634	DNA metabolism	DNA replication, recombination, and repair	DNA repair protein RecN	PF02463.15	Bacteria	Bacteroidetes	Bacteroidia	Bacteroidales	Bacteroidaceae	Bacteroides	Bacteroides graminisolvens	8.85e-05	0	0	0	0	0	0	0	9.89e-05	0.000128798	0.000107337	0	0	0.000128617	0.000110877	8.85e-05
A0A069D1K0	NA	COG1131	cellular processes and signaling	V : Defense mechanisms	ABC-type multidrug transport system, ATPase component	no hit	-	-	-	PF00005.23	Bacteria	Bacteroidetes	Bacteroidia	Bacteroidales	Bacteroidaceae	Bacteroides	Bacteroides graminisolvens	0	0.000240505	0	0	0.000418426	0.000227665	0.000267256	0.000491064	0.000712385	0.000697278	0.000427526	0.000807124	0.000533618	0.000318813	0.000315526	0
A0A069D1K5	NA	COG0172	information storage and processing	J : Translation	Seryl-tRNA synthetase	TIGR00414	Protein synthesis	tRNA aminoacylation	serine--tRNA ligase	PF00587.21	Bacteria	Bacteroidetes	Bacteroidia	Bacteroidales	Bacteroidaceae	Bacteroides	Bacteroides graminisolvens	0.000296081	0.000238265	0.000158421	0.000196729	0.000198722	0.000257393	0.000177438	0.000268216	0.000459381	0.000556837	0.000652297	0.000605355	0.000190159	0.00040275	0.000373726	0.000470582
A0A069D1K8	NA	COG0527	metabolism	E : Amino acid	Aspartokinases	TIGR00657	Amino acid biosynthesis	Aspartate family	aspartate kinase	PF00696.24	Bacteria	Bacteroidetes	Bacteroidia	Bacteroidales	Bacteroidaceae	Bacteroides	Bacteroides graminisolvens	0.000247656	0.000158413	0.000224512	0.000182178	0	0.000486449	0.000285477	0	0.000654578	0.000542315	0.000578163	0.000635527	0.000819419	0.000339864	0.000300029	0.000294217
A0A069D1L1	NA	no hit	-	S : Function unknown	-	no hit	-	-	-	PF14092.2	Bacteria	Bacteroidetes	Bacteroidia	Bacteroidales	Bacteroidaceae	Bacteroides	Bacteroides graminisolvens	0.000302827	0.000299643	0.000250639	0.000115137	0.000528797	0.000190096	0.000267825	0.000124911	0.000273045	0.000393808	0.000427398	0.00037383	0.000244939	0.000280337	0.000270595	0.000271207
A0A069D1L8	NA	no hit	-	S : Function unknown	-	no hit	-	-	-	PF16109.1	Bacteria	Bacteroidetes	Bacteroidia	Bacteroidales	Bacteroidaceae	Bacteroides	Bacteroides graminisolvens	0	0	0	0	0	0	0	0	0	0	0.000221387	0	0	0	0	0
A0A069D1M0	CE1	COG2382	metabolism	P : Inorganic ion	Enterochelin esterase and related enzymes	no hit	-	-	-	PF00756.16	Bacteria	Bacteroidetes	Bacteroidia	Bacteroidales	Bacteroidaceae	Bacteroides	Bacteroides graminisolvens	0.000270291	0.000619088	0.000219182	0.000315342	0.000293891	0.000469308	0.00052618	0.000509146	0.000685212	0.00111308	0.00130631	0.0013852	0.000550682	0.000969338	0.00125523	0.000998086
A0A069D1M1	NA	COG0339	metabolism	E : Amino acid	Zn-dependent oligopeptidases	no hit	-	-	-	PF01432.16	Bacteria	Bacteroidetes	Bacteroidia	Bacteroidales	Bacteroidaceae	Bacteroides	Bacteroides graminisolvens	0.000381465	0.000411344	0.000314293	0.000475716	0.000219144	0.000234998	0.000256559	0.000164373	0.00045942	0.000302255	0.000496379	0.000457183	0.000535398	0.00024939	0.000133201	0.000166924
A0A069D1M7	NA	COG1629	metabolism	P : Inorganic ion	Outer membrane receptor proteins, mostly Fe transport	TIGR04056	Transport and binding proteins	Unknown substrate	TonB-linked outer membrane protein, SusC/RagA family	PF07715.11	Bacteria	Bacteroidetes	Bacteroidia	Bacteroidales	Bacteroidaceae	Bacteroides	Bacteroides graminisolvens	9.43e-05	4.61e-05	0.00151796	0.00153455	0.000602816	0.000314301	0.000246728	0.000239806	0.00121467	0.000128771	0.000163276	0.000243577	0.001218	9.86e-05	0.00016082	0.000182074
A0A069D1M8	NA	COG1853	poorly characterized	R : General function prediction only	Conserved protein/domain typically associated with flavoprotein oxygenases, DIM6/NTAB family	no hit	-	-	-	PF14730.2	Bacteria	Bacteroidetes	Bacteroidia	Bacteroidales	Bacteroidaceae	Bacteroides	Bacteroides graminisolvens	0.000151789	0.000207905	0.00028667	0.000133003	0.000896992	0.000483066	0.000468765	0.000270471	0.000343222	0.000587651	0.000548583	0.00039503	0.00027299	0.000324582	0.0005085	0.000411647
A0A069D1N1	NA	COG0436	metabolism	E : Amino acid	Aspartate/tyrosine/aromatic aminotransferase	no hit	-	-	-	PF00155.17	Bacteria	Bacteroidetes	Bacteroidia	Bacteroidales	Bacteroidaceae	Bacteroides	Bacteroides graminisolvens	0	0	0	0	0.000246441	0	0	0	0	9.31e-05	0	0.000118918	0	0	0	0
A0A069D1N4	NA	no hit	-	S : Function unknown	-	no hit	-	-	-	PF12712.3	Bacteria	Bacteroidetes	Bacteroidia	Bacteroidales	Bacteroidaceae	Bacteroides	Bacteroides graminisolvens	0	0	0.000173416	0	0	0	0	0	0.000129218	0.000132735	0	0	0.000121638	0	0	0
A0A069D1P0	NA	COG2876	metabolism	E : Amino acid	3-deoxy-D-arabino-heptulosonate 7-phosphate (DAHP) synthase	no hit	-	-	-	PF00793.16	Bacteria	Bacteroidetes	Bacteroidia	Bacteroidales	Bacteroidaceae	Bacteroides	Bacteroides graminisolvens	0.000174579	0.000397626	0.000191433	0.000380049	0	0.000151504	0.000530267	0.00015554	0.000590401	0.000560159	0.000647453	0.000635302	0.000472284	0.000550359	0.000297459	0.000410488
A0A069D1P4	NA	COG0150	metabolism	F : Nucleotide	Phosphoribosylaminoimidazole (AIR) synthetase	no hit	-	-	-	PF02769.18	Bacteria	Bacteroidetes	Bacteroidia	Bacteroidales	Bacteroidaceae	Bacteroides	Bacteroides graminisolvens	0.000232033	0.000290892	0.000215221	0.000171371	0.000345397	0.000275779	0.00024201	0.000251136	0.000201464	0.000264352	0.000208539	0.000367483	0.000258931	0.000177	0.000364556	0.000333649
A0A069D1P5	NA	COG0629	information storage and processing	L : Replication	Single-stranded DNA-binding protein	TIGR00621	DNA metabolism	DNA replication, recombination, and repair	single-stranded DNA-binding protein	PF00436.21	Bacteria	Bacteroidetes	Bacteroidia	Bacteroidales	Bacteroidaceae	Bacteroides	Bacteroides graminisolvens	0	0	0	0	0	0.000358933	0	0.000368495	0	0	0	0	0	0	0	0.000329222
A0A069D1P6	NA	COG0149	metabolism	G : Carbohydrate	Triosephosphate isomerase	TIGR00419	Energy metabolism	Glycolysis/gluconeogenesis	triose-phosphate isomerase	PF00121.14	Bacteria	Bacteroidetes	Bacteroidia	Bacteroidales	Bacteroidaceae	Bacteroides	Bacteroides graminisolvens	0.000621232	0.000465315	0.000549025	0.000508883	0.000666439	0.000745605	0.000697228	0.00050238	0.00050094	0.000707588	0.000618156	0.000731045	0.000374531	0.000602414	0.000503069	0.000353415
A0A069D1P9	CE11	COG0774	cellular processes and signaling	M : Cell wall	UDP-3-O-acyl-N-acetylglucosamine deacetylase	TIGR00325	Cell envelope	Biosynthesis and degradation of surface polysaccharides and lipopolysaccharides	UDP-3-O-[3-hydroxymyristoyl] N-acetylglucosamine deacetylase	PF03331.9	Bacteria	Bacteroidetes	Bacteroidia	Bacteroidales	Bacteroidaceae	Bacteroides	Bacteroides graminisolvens	0.000377252	0.00049116	0.000490198	0.000420357	0.000166684	0.000266499	0.000183617	0.000143532	0.000392996	0.000364308	0.000559277	0.000703891	0.00033425	0.000371991	0.000613062	0.000615747
A0A069D1Q2	NA	COG0525	information storage and processing	J : Translation	Valyl-tRNA synthetase	TIGR00422	Protein synthesis	tRNA aminoacylation	valine--tRNA ligase	PF00133.18	Bacteria	Bacteroidetes	Bacteroidia	Bacteroidales	Bacteroidaceae	Bacteroides	Bacteroides graminisolvens	7.13e-05	0.000105816	9.92e-05	0	0.000100914	0.000134231	0.000188243	0	0.000240574	0.000238236	0.000231812	0.000231503	0.000151303	0.000139492	0	0.000147753
A0A069D1Q3	NA	no hit	-	S : Function unknown	-	no hit	-	-	-	PF03417.12	Bacteria	Bacteroidetes	Bacteroidia	Bacteroidales	Bacteroidaceae	Bacteroides	Bacteroides graminisolvens	0.000156096	0	0.00024318	0.000161781	0	0	0	0.000142538	8.8e-05	0.000138	0.000135166	0	0.000234983	0	0.000199038	0
A0A069D1Q5	NA	COG0811	cellular processes and signaling	U : Intracellular trafficking	Biopolymer transport proteins	no hit	-	-	-	PF01618.12	Bacteria	Bacteroidetes	Bacteroidia	Bacteroidales	Bacteroidaceae	Bacteroides	Bacteroides graminisolvens	0	0	0	0	0	0	0	0	0	0	0	0	0	0	0.000208994	0.000205247
A0A069D1Q7	NA	COG0189	metabolism	H : Coenzyme	Glutathione synthase/Ribosomal protein S6 modification enzyme (glutaminyl transferase)	no hit	-	-	-	no hit	Bacteria	Bacteroidetes	Bacteroidia	Bacteroidales	Bacteroidaceae	Bacteroides	Bacteroides graminisolvens	0	0	0	0	0	0	0	0	0	0	0	0.000341072	0	0	0	0
A0A069D1S0	NA	COG1674	cellular processes and signaling	D : Cell cycle control	DNA segregation ATPase FtsK/SpoIIIE and related proteins	no hit	-	-	-	PF01580.14	Bacteria	Bacteroidetes	Bacteroidia	Bacteroidales	Bacteroidaceae	Bacteroides	Bacteroides graminisolvens	0.000207925	0.000136826	0.000101591	0.000145901	0	0	0	0	0.000124415	9.62e-05	0.000187254	0.00017107	5.67e-05	9.83e-05	7.72e-05	0.000179029
A0A069D1T1	NA	COG1052	metabolism	C : Energy production and conversion	Lactate dehydrogenase and related dehydrogenases	no hit	-	-	-	PF02826.15	Bacteria	Bacteroidetes	Bacteroidia	Bacteroidales	Bacteroidaceae	Bacteroides	Bacteroides graminisolvens	0.000739757	0.000677875	0.000948259	0.00112639	0.000496508	0.000481894	0.000470585	0.000456468	0.000412865	0.00099572	0.00100546	0.000795575	0.000334232	0.000565752	0.00071099	0.000818475
A0A069D1T4	NA	COG0363	metabolism	G : Carbohydrate	6-phosphogluconolactonase/Glucosamine-6-phosphate isomerase/deaminase	TIGR00502	Central intermediary metabolism	Amino sugars	glucosamine-6-phosphate deaminase	PF01182.16	Bacteria	Bacteroidetes	Bacteroidia	Bacteroidales	Bacteroidaceae	Bacteroides	Bacteroides graminisolvens	0	0.000260743	0.000368808	0.000422229	0.00042868	0.00085515	0.000673687	0.000489572	0.000446219	0.000465103	0.000355202	0.000640152	0.000251355	0.000330481	0.000472114	0.000477696
A0A069D1T6	NA	COG0346	metabolism	E : Amino acid	Lactoylglutathione lyase and related lyases	no hit	-	-	-	PF12681.3	Bacteria	Bacteroidetes	Bacteroidia	Bacteroidales	Bacteroidaceae	Bacteroides	Bacteroides graminisolvens	0	0	0	0	0	0	0	0	0	0	0	0.000392915	0.000258161	0.000462639	0	0.00037617
A0A069D1T9	NA	COG4231	metabolism	C : Energy production and conversion	Indolepyruvate ferredoxin oxidoreductase, alpha and beta subunits	no hit	-	-	-	PF02775.17	Bacteria	Bacteroidetes	Bacteroidia	Bacteroidales	Bacteroidaceae	Bacteroides	Bacteroides graminisolvens	9.34e-05	0.000158963	0	0.000150957	0	0	0	0	0.000131314	0.000204585	0.000188288	0.000206406	0.000128561	9.54e-05	7.78e-05	9.49e-05
A0A069D1U4	NA	COG0612	poorly characterized	R : General function prediction only	Predicted Zn-dependent peptidases	no hit	-	-	-	PF05193.17	Bacteria	Bacteroidetes	Bacteroidia	Bacteroidales	Bacteroidaceae	Bacteroides	Bacteroides graminisolvens	0.00028707	0.00071607	0.000438451	0.000362243	0.000123325	0.000151361	0.00025894	0.00027981	0.00137567	0.00171116	0.00156457	0.00176364	0.000820244	0.00115462	0.00070558	0.00062681
A0A069D1U5	NA	no hit	-	S : Function unknown	-	no hit	-	-	-	no hit	Bacteria	Bacteroidetes	Bacteroidia	Bacteroidales	Bacteroidaceae	Bacteroides	Bacteroides graminisolvens	0	0	0	0	0	0.000144935	0.000170203	0	0	0.000148432	0.000114682	0	0	0	0.000135365	0.000134769
A0A069D1U7	GH43_10	COG3507	metabolism	G : Carbohydrate	Beta-xylosidase	no hit	-	-	-	PF04616.10	Bacteria	Bacteroidetes	Bacteroidia	Bacteroidales	Bacteroidaceae	Bacteroides	Bacteroides graminisolvens	0.000161491	0.000125614	0.000179116	9.68e-05	0	0	0	9.84e-05	0.00010001	9.73e-05	0.000197574	8.5e-05	0.000141212	9.64e-05	0	0
A0A069D1U9	NA	COG0261	information storage and processing	J : Translation	Ribosomal protein L21	TIGR00061	Protein synthesis	Ribosomal proteins: synthesis and modification	ribosomal protein bL21	PF00829.17	Bacteria	Bacteroidetes	Bacteroidia	Bacteroidales	Bacteroidaceae	Bacteroides	Bacteroides graminisolvens	0.000858213	0.000608569	0.000706598	0.00102856	0.00142548	0.00135933	0.00101085	0	0.000654687	0.000608287	0.000408403	0	0.000616888	0	0.000520639	0
A0A069D1V4	NA	COG0414	metabolism	H : Coenzyme	Panthothenate synthetase	TIGR00018	Biosynthesis of cofactors, prosthetic groups, and carriers	Pantothenate and coenzyme A	pantoate--beta-alanine ligase	PF02569.11	Bacteria	Bacteroidetes	Bacteroidia	Bacteroidales	Bacteroidaceae	Bacteroides	Bacteroides graminisolvens	0	0	0	0	0.000237614	0	0	0.00020461	0.000128302	0	0.000233695	0.000174164	0.000181989	0	0	0
A0A069D1V7	NA	COG4221	poorly characterized	R : General function prediction only	Short-chain alcohol dehydrogenase of unknown specificity	no hit	-	-	-	PF00106.21	Bacteria	Bacteroidetes	Bacteroidia	Bacteroidales	Bacteroidaceae	Bacteroides	Bacteroides graminisolvens	0.000185655	0.000441942	0.000512333	0.000543102	0.000455577	0.000419617	0.00029188	0.000637886	0.000423478	0.000560754	0.000431329	0.000808722	0.000336045	0.000409581	0.000422678	0.000379438
A0A069D1V9	NA	COG0412	metabolism	Q : Secondary metabolites	Dienelactone hydrolase and related enzymes	no hit	-	-	-	PF12695.3	Bacteria	Bacteroidetes	Bacteroidia	Bacteroidales	Bacteroidaceae	Bacteroides	Bacteroides graminisolvens	0	0	0	0	0.000212048	0	0.00019875	0	0	0.00013201	0	0	0	0	0	0
A0A069D1W1	GH133	COG3408	metabolism	G : Carbohydrate	Glycogen debranching enzyme	no hit	-	-	-	PF12439.4	Bacteria	Bacteroidetes	Bacteroidia	Bacteroidales	Bacteroidaceae	Bacteroides	Bacteroides graminisolvens	0.000216123	0.000154335	0.000212503	0.000315404	0.000129982	0.000252479	0.000346109	0.000123894	0.000300981	0.000264459	0.000311864	0.000269868	0.000230997	0.000272681	0.000164287	0.000252835
A0A069D1W4	NA	COG1482	metabolism	G : Carbohydrate	Phosphomannose isomerase	TIGR00218	Energy metabolism	Sugars	mannose-6-phosphate isomerase, class I	PF01238.17	Bacteria	Bacteroidetes	Bacteroidia	Bacteroidales	Bacteroidaceae	Bacteroides	Bacteroides graminisolvens	0.000544988	0.000738985	0.000978635	0.000541896	0.000360783	0.000553758	0.000761394	0.000414159	0.000923061	0.00123233	0.00103981	0.00111709	0.00105676	0.000771442	0.00111596	0.00123136
A0A069D1W5	NA	no hit	-	S : Function unknown	-	no hit	-	-	-	no hit	Bacteria	Bacteroidetes	Bacteroidia	Bacteroidales	Bacteroidaceae	Bacteroides	Bacteroides graminisolvens	0	0	0	0	0	0	0	0	0	0.000372457	0.00036122	0.000417006	0	0	0	0
A0A069D1W6	NA	COG1917	poorly characterized	S : Function unknown	Uncharacterized conserved protein, contains double-stranded beta-helix domain	no hit	-	-	-	PF07883.7	Bacteria	Bacteroidetes	Bacteroidia	Bacteroidales	Bacteroidaceae	Bacteroides	Bacteroides graminisolvens	0	0	0	0	0	0.000540767	0.000563859	0	0.0002741	0	0	0	0	0	0	0
A0A069D1W7	NA	COG1970	cellular processes and signaling	M : Cell wall	Large-conductance mechanosensitive channel	TIGR00220	Cellular processes	Adaptations to atypical conditions	large conductance mechanosensitive channel protein	PF01741.14	Bacteria	Bacteroidetes	Bacteroidia	Bacteroidales	Bacteroidaceae	Bacteroides	Bacteroides graminisolvens	0	0	0	0	0.000570128	0.000492284	0	0.000629348	0.000249526	0	0.000908993	0.000778856	0.000334633	0.000585071	0.000608974	0.000347663
A0A069D1X2	NA	COG0793	cellular processes and signaling	M : Cell wall	Periplasmic protease	TIGR00225	Protein fate	Degradation of proteins, peptides, and glycopeptides	C-terminal processing peptidase	PF03572.14	Bacteria	Bacteroidetes	Bacteroidia	Bacteroidales	Bacteroidaceae	Bacteroides	Bacteroides graminisolvens	0.000155494	0.000242126	0.000343473	0.000227758	0	9.24e-05	0.00021588	0.000130679	0.000237451	0.000194423	0.000289555	0.000214503	0.000117925	0.00022226	0.000133811	0.000138879
A0A069D1X5	NA	COG0664	cellular processes and signaling	T : Signal transduction	cAMP-binding proteins - catabolite gene activator and regulatory subunit of cAMP-dependent protein kinases	no hit	-	-	-	PF00027.25	Bacteria	Bacteroidetes	Bacteroidia	Bacteroidales	Bacteroidaceae	Bacteroides	Bacteroides graminisolvens	0.000391792	0.000364536	0.000355795	0.000348514	0.000427522	0.000232311	0	0.000328953	0.000376092	0.000323182	0	0	0.000350706	0.00032443	0.00023431	0
A0A069D1X8	NA	COG0054	metabolism	H : Coenzyme	Riboflavin synthase beta-chain	TIGR00114	Biosynthesis of cofactors, prosthetic groups, and carriers	Riboflavin, FMN, and FAD	6,7-dimethyl-8-ribityllumazine synthase	PF00885.15	Bacteria	Bacteroidetes	Bacteroidia	Bacteroidales	Bacteroidaceae	Bacteroides	Bacteroides graminisolvens	0	0	0	0	0	0	0	0	0	0	0	0	0	0.000218993	0	0
A0A069D1Y6	CE1	COG2382	metabolism	P : Inorganic ion	Enterochelin esterase and related enzymes	no hit	-	-	-	PF00756.16	Bacteria	Bacteroidetes	Bacteroidia	Bacteroidales	Bacteroidaceae	Bacteroides	Bacteroides graminisolvens	0	0	0	0	0	0	0	0	0.000223341	0.000335291	0.000355949	0.000292891	0.000210239	0	0.000254878	0.000290255
A0A069D1Z0	GH51	COG3534	metabolism	G : Carbohydrate	Alpha-L-arabinofuranosidase	no hit	-	-	-	no hit	Bacteria	Bacteroidetes	Bacteroidia	Bacteroidales	Bacteroidaceae	Bacteroides	Bacteroides graminisolvens	0.000540218	0.000432247	0.000438363	0.00072192	0.000431272	0	0.000399471	0.000240815	0.000402501	0.000688096	0.000624117	0.000832949	0.000385614	0.000458085	0.000679617	0.000713197
A0A069D1Z3	GH10-CBM4	COG3693	metabolism	G : Carbohydrate	Beta-1,4-xylanase	no hit	-	-	-	PF00331.16	Bacteria	Bacteroidetes	Bacteroidia	Bacteroidales	Bacteroidaceae	Bacteroides	Bacteroides graminisolvens	0.000489525	0.000699701	0.000501762	0.000505104	0.000304115	0.000326596	0.000504526	0.000424632	0.00113568	0.000900499	0.00105472	0.00113745	0.000840087	0.000676622	0.000879278	0.000872168
A0A069D1Z9	NA	no hit	-	S : Function unknown	-	no hit	-	-	-	no hit	Bacteria	Bacteroidetes	Bacteroidia	Bacteroidales	Bacteroidaceae	Bacteroides	Bacteroides graminisolvens	0.000562232	0.000394039	0	0	0	0	0	0	0	0.000565285	0.000481128	0.000326606	0.000451331	0.000378313	0	0.000328821
A0A069D201	NA	COG0211	information storage and processing	J : Translation	Ribosomal protein L27	no hit	-	-	-	PF01016.15	Bacteria	Bacteroidetes	Bacteroidia	Bacteroidales	Bacteroidaceae	Bacteroides	Bacteroides graminisolvens	0.000972051	0.00128152	0.00151435	0.00209835	0	0	0	0	0.00215289	0.00192948	0.000641173	0	0.00133212	0.00131427	0	0
A0A069D202	NA	COG1629	metabolism	P : Inorganic ion	Outer membrane receptor proteins, mostly Fe transport	TIGR04056	Transport and binding proteins	Unknown substrate	TonB-linked outer membrane protein, SusC/RagA family	PF13715.2	Bacteria	Bacteroidetes	Bacteroidia	Bacteroidales	Bacteroidaceae	Bacteroides	Bacteroides graminisolvens	4.12e-05	6.76e-05	6.41e-05	0	0	0	0	0	0	0	0	0	0	0	0	0
A0A069D203	NA	no hit	-	S : Function unknown	-	no hit	-	-	-	PF07929.7	Bacteria	Bacteroidetes	Bacteroidia	Bacteroidales	Bacteroidaceae	Bacteroides	Bacteroides graminisolvens	0	0.00030082	0.000270421	0	0	0.000288123	0	0	0.000549361	0.000427533	0.000298706	0	0.000240526	0.000215586	0.00022199	0
A0A069D206	GT5	COG0297	metabolism	G : Carbohydrate	Glycogen synthase	no hit	-	-	-	PF08323.7	Bacteria	Bacteroidetes	Bacteroidia	Bacteroidales	Bacteroidaceae	Bacteroides	Bacteroides graminisolvens	0.0001537	0.000303631	0.000237061	0.000411597	0.000241032	0.000449217	0.000533988	0	0.000494547	0.000664374	0.000705902	0.000617826	0.000605853	0.000451788	0.00074542	0.000643755
A0A069D216	NA	COG0057	metabolism	G : Carbohydrate	Glyceraldehyde-3-phosphate dehydrogenase/erythrose-4-phosphate dehydrogenase	TIGR01534	Energy metabolism	Glycolysis/gluconeogenesis	glyceraldehyde-3-phosphate dehydrogenase, type I	PF02800.16	Bacteria	Bacteroidetes	Bacteroidia	Bacteroidales	Bacteroidaceae	Bacteroides	Bacteroides graminisolvens	0.00270693	0.002428	0.0026676	0.0030722	0.00378379	0.0029712	0.00244695	0.00164718	0.00248281	0.00253	0.00258519	0.00261878	0.0022254	0.00217137	0.00286626	0.00285776
A0A069D224	GH97	no hit	-	S : Function unknown	-	no hit	-	-	-	PF10566.5	Bacteria	Bacteroidetes	Bacteroidia	Bacteroidales	Bacteroidaceae	Bacteroides	Bacteroides graminisolvens	0.00014024	6.52e-05	7.78e-05	0.000127451	0	8.33e-05	0	0	0.000269973	0.000164488	0.000224168	0.000247129	8.65e-05	0.000111192	6.43e-05	0.000146484
A0A069D230	NA	COG0152	metabolism	F : Nucleotide	Phosphoribosylaminoimidazolesuccinocarboxamide (SAICAR) synthase	no hit	-	-	-	PF01259.14	Bacteria	Bacteroidetes	Bacteroidia	Bacteroidales	Bacteroidaceae	Bacteroides	Bacteroides graminisolvens	0.000892641	0.00107636	0.00143367	0.000919469	0.0015277	0.00136778	0.00116526	0.000989126	0.000908609	0.00142734	0.00119974	0.00120209	0.000979323	0.000762841	0.000805341	0.000520968
A0A069D234	NA	COG2982	cellular processes and signaling	M : Cell wall	Uncharacterized protein involved in outer membrane biogenesis	no hit	-	-	-	PF13502.2	Bacteria	Bacteroidetes	Bacteroidia	Bacteroidales	Bacteroidaceae	Bacteroides	Bacteroides graminisolvens	0.000399654	0.000509918	0.000682107	0.000551684	0.000581362	0.00045091	0.00059232	0.000578608	0.000479226	0.000555581	0.000704821	0.000683633	0.000340956	0.000421757	0.000467348	0.000424151
A0A069D235	NA	COG1704	poorly characterized	S : Function unknown	Uncharacterized conserved protein	no hit	-	-	-	PF04011.8	Bacteria	Bacteroidetes	Bacteroidia	Bacteroidales	Bacteroidaceae	Bacteroides	Bacteroides graminisolvens	0.000221392	0.000216768	0.000341467	0.000621403	0.000601928	0.000738982	0.00109139	0.00130161	0.000289137	0.000826383	0.00110468	0.0013048	0.000714743	0.000992162	0.0013178	0.00136022
A0A069D239	NA	COG1506	metabolism	E : Amino acid	Dipeptidyl aminopeptidases/acylaminoacyl-peptidases	no hit	-	-	-	PF00930.17	Bacteria	Bacteroidetes	Bacteroidia	Bacteroidales	Bacteroidaceae	Bacteroides	Bacteroides graminisolvens	0.000218887	0.000189661	0.0001823	0.000180931	0.000179366	0.000218461	8.54e-05	0.000107187	0.000214945	0.000237091	0.00021382	0.000364978	0.00027803	0.000190758	0.000116826	0.000135319
A0A069D241	NA	COG1044	cellular processes and signaling	M : Cell wall	UDP-3-O-[3-hydroxymyristoyl] glucosamine N-acyltransferase	TIGR01853	Cell envelope	Biosynthesis and degradation of surface polysaccharides and lipopolysaccharides	UDP-3-O-[3-hydroxymyristoyl] glucosamine N-acyltransferase LpxD	PF00132.20	Bacteria	Bacteroidetes	Bacteroidia	Bacteroidales	Bacteroidaceae	Bacteroides	Bacteroides graminisolvens	0	0	0	0	0	0	0	0	0.00012895	0.000199674	0.000235966	0.000231766	0.000160613	0	0.000180124	0
A0A069D242	GH105-GH2	COG3250	metabolism	G : Carbohydrate	Beta-galactosidase/beta-glucuronidase	no hit	-	-	-	PF07470.9	Bacteria	Bacteroidetes	Bacteroidia	Bacteroidales	Bacteroidaceae	Bacteroides	Bacteroides graminisolvens	4.47e-05	0	0	7.51e-05	0	0	0	0	0	0	0	0	0	0	0	0
A0A069D245	GH28	COG5434	cellular processes and signaling	M : Cell wall	Endopolygalacturonase	no hit	-	-	-	PF00295.13	Bacteria	Bacteroidetes	Bacteroidia	Bacteroidales	Bacteroidaceae	Bacteroides	Bacteroides graminisolvens	0	0	0	0	0	0	0	0	6.8e-05	7.43e-05	7.61e-05	0	0.000188844	0	0	0
A0A069D252	NA	COG1168	metabolism	E : Amino acid	Bifunctional PLP-dependent enzyme with beta-cystathionase and maltose regulon repressor activities	TIGR04350	-	-	putative C-S lyase	PF00155.17	Bacteria	Bacteroidetes	Bacteroidia	Bacteroidales	Bacteroidaceae	Bacteroides	Bacteroides graminisolvens	0.00016408	0.000107654	0.000293389	0.000306729	0.00033717	0.000205654	0	0	0.000556032	0.000235134	0.000257739	0	0.000862314	0.000183708	0	0.000120259
A0A069D254	GH51	COG3534	metabolism	G : Carbohydrate	Alpha-L-arabinofuranosidase	no hit	-	-	-	PF06964.8	Bacteria	Bacteroidetes	Bacteroidia	Bacteroidales	Bacteroidaceae	Bacteroides	Bacteroides graminisolvens	0	0	0	0	0	0	0	0	0	6.81e-05	0	5.81e-05	0	0	0	0
A0A069D255	NA	no hit	-	S : Function unknown	-	no hit	-	-	-	PF14057.2	Bacteria	Bacteroidetes	Bacteroidia	Bacteroidales	Bacteroidaceae	Bacteroides	Bacteroides graminisolvens	0.00102856	0.000836663	0.00079604	0.000305034	0.000984149	0.000689501	0.000441812	0.000570668	0.000586036	0.000710078	0.000667684	0.000744351	0.000538146	0.000499542	0.00045963	0.000431257
A0A069D259	NA	no hit	-	S : Function unknown	-	no hit	-	-	-	PF14322.2	Bacteria	Bacteroidetes	Bacteroidia	Bacteroidales	Bacteroidaceae	Bacteroides	Bacteroides graminisolvens	0.00131207	0.000579642	0.000490898	0.000377072	0.000877891	0.000770483	0.000384184	0.000525351	0.00060612	0.000376562	0.000300489	0.000301751	0.000578179	0.000175318	0.000318897	0.000126711
A0A069D272	NA	COG2050	metabolism	Q : Secondary metabolites	Uncharacterized protein, possibly involved in aromatic compounds catabolism	no hit	-	-	-	PF03061.18	Bacteria	Bacteroidetes	Bacteroidia	Bacteroidales	Bacteroidaceae	Bacteroides	Bacteroides graminisolvens	0	0	0	0	0	0.000312754	0	0	0	0	0	0	0	0	0	0
A0A069D274	NA	COG0009	information storage and processing	J : Translation	Putative translation factor (SUA5)	TIGR00057	Protein synthesis	tRNA and rRNA base modification	tRNA threonylcarbamoyl adenosine modification protein, Sua5/YciO/YrdC/YwlC family	PF01300.14	Bacteria	Bacteroidetes	Bacteroidia	Bacteroidales	Bacteroidaceae	Bacteroides	Bacteroides graminisolvens	0	0	0	0	0	0.000392611	0	0	0.000218732	0.000268488	0.000207438	0.000349761	0.000171908	0	0.000202403	0
A0A069D279	GH43_29	COG3507	metabolism	G : Carbohydrate	Beta-xylosidase	no hit	-	-	-	PF04616.10	Bacteria	Bacteroidetes	Bacteroidia	Bacteroidales	Bacteroidaceae	Bacteroides	Bacteroides graminisolvens	0.000222306	0.00013189	0.000236649	0.000168747	0.000209397	0.000167191	0.000465184	0.000180313	0.000366578	0.000330005	0.000565295	0.000353292	0.0003193	0	0.000242114	0.000557843
A0A069D285	NA	no hit	-	S : Function unknown	-	no hit	-	-	-	PF16153.1	Bacteria	Bacteroidetes	Bacteroidia	Bacteroidales	Bacteroidaceae	Bacteroides	Bacteroides graminisolvens	0	0	0	0	0	0	0	0	0	9.15e-05	9.96e-05	0	0	0	0	0
A0A069D289	NA	COG1629	metabolism	P : Inorganic ion	Outer membrane receptor proteins, mostly Fe transport	TIGR04056	Transport and binding proteins	Unknown substrate	TonB-linked outer membrane protein, SusC/RagA family	PF07715.11	Bacteria	Bacteroidetes	Bacteroidia	Bacteroidales	Bacteroidaceae	Bacteroides	Bacteroides graminisolvens	0.00193557	0.0014041	0.00132256	0.00171843	0.00128313	0.00121173	0.00111199	0.00111066	0.00186728	0.00161197	0.00170721	0.00214113	0.00157935	0.00135165	0.0013165	0.00150345
A0A069D290	NA	no hit	-	S : Function unknown	-	no hit	-	-	-	PF07980.7	Bacteria	Bacteroidetes	Bacteroidia	Bacteroidales	Bacteroidaceae	Bacteroides	Bacteroides graminisolvens	0.000100564	0.000200715	0.000184247	0.000166641	0	0.000139733	0	0	0	0	0	0	0	0	0	0
A0A069D293	NA	COG1410	metabolism	E : Amino acid	Methionine synthase I, cobalamin-binding domain	no hit	-	-	-	PF02965.13	Bacteria	Bacteroidetes	Bacteroidia	Bacteroidales	Bacteroidaceae	Bacteroides	Bacteroides graminisolvens	0	0	0.000164597	0	0.000227143	0.000181125	0	0.000198588	0	0.000258598	0	0.000158321	0	0	0	0
A0A069D2A6	NA	COG0388	poorly characterized	R : General function prediction only	Predicted amidohydrolase	no hit	-	-	-	PF00795.18	Bacteria	Bacteroidetes	Bacteroidia	Bacteroidales	Bacteroidaceae	Bacteroides	Bacteroides graminisolvens	0	0	0	0	0.000256732	0	0	0	0	0	0	0	0	0	0	0
A0A069D2A9	GH95	no hit	-	S : Function unknown	-	no hit	-	-	-	PF14498.2	Bacteria	Bacteroidetes	Bacteroidia	Bacteroidales	Bacteroidaceae	Bacteroides	Bacteroides graminisolvens	0	0	0	0	8.23e-05	0	0.000116136	0	4.45e-05	4.88e-05	0.000109224	0.000114314	5.52e-05	0	0	0
A0A069D2B4	GH43_2-CBM6-GH8	COG3405	metabolism	G : Carbohydrate	Endoglucanase Y	no hit	-	-	-	PF04616.10	Bacteria	Bacteroidetes	Bacteroidia	Bacteroidales	Bacteroidaceae	Bacteroides	Bacteroides graminisolvens	0.00012978	0.000150911	0	0	7.98e-05	0	0	0	0.000150539	0.000168879	0.000234479	9.35e-05	0.000121979	0.000106719	0.000125145	0
A0A069D2B9	GH10-CE1	COG3693	metabolism	G : Carbohydrate	Beta-1,4-xylanase	no hit	-	-	-	PF00331.16	Bacteria	Bacteroidetes	Bacteroidia	Bacteroidales	Bacteroidaceae	Bacteroides	Bacteroides graminisolvens	0.000654582	0.000510753	0.000418772	0.000450795	0.000187171	0.000174154	0.00038219	0.000201264	0.00109834	0.00119875	0.00133431	0.00132537	0.000875916	0.000934312	0.000816201	0.00108608
A0A069D2C4	NA	no hit	-	S : Function unknown	-	no hit	-	-	-	PF07980.7	Bacteria	Bacteroidetes	Bacteroidia	Bacteroidales	Bacteroidaceae	Bacteroides	Bacteroides graminisolvens	0.000960882	0.000792638	0.000664107	0.000592903	0.00062626	0.000559567	0.000573345	0.000363567	0.00125577	0.00104193	0.00127931	0.00119453	0.00111738	0.000792714	0.00104389	0.000968209
A0A069D2C6	NA	no hit	-	S : Function unknown	-	no hit	-	-	-	PF15889.1	Bacteria	Bacteroidetes	Bacteroidia	Bacteroidales	Bacteroidaceae	Bacteroides	Bacteroides graminisolvens	0	0	0.000279047	0	0.000366159	0	0.000406718	0.000315301	0.000593134	0	0.00023433	0	0.000616694	0.000278568	0.000336325	0.00027547
A0A069D2C7	NA	COG0667	metabolism	C : Energy production and conversion	Predicted oxidoreductases (related to aryl-alcohol dehydrogenases)	no hit	-	-	-	PF00248.17	Bacteria	Bacteroidetes	Bacteroidia	Bacteroidales	Bacteroidaceae	Bacteroides	Bacteroides graminisolvens	0	0	0	0	0	0	0	0	0.000153304	0.000207499	0.000258653	0.000206062	0.000254182	0.000212548	0.000347686	0.000158239
A0A069D2D0	GH2	COG3250	metabolism	G : Carbohydrate	Beta-galactosidase/beta-glucuronidase	no hit	-	-	-	PF02837.14	Bacteria	Bacteroidetes	Bacteroidia	Bacteroidales	Bacteroidaceae	Bacteroides	Bacteroides graminisolvens	0.000183779	0	0	0	0	0.000114907	0	0	7.78e-05	0	0	0	7.33e-05	0	0	0
A0A069D2D2	NA	COG1088	cellular processes and signaling	M : Cell wall	dTDP-D-glucose 4,6-dehydratase	TIGR01181	Cell envelope	Biosynthesis and degradation of surface polysaccharides and lipopolysaccharides	dTDP-glucose 4,6-dehydratase	PF16363.1	Bacteria	Bacteroidetes	Bacteroidia	Bacteroidales	Bacteroidaceae	Bacteroides	Bacteroides graminisolvens	0	0	0.000134738	0	0.000259446	0	0	0	0.000117751	0.000242579	0.000146595	0.000168232	8.52e-05	0.000102521	0.000142194	0.000185201
A0A069D2D4	NA	no hit	-	S : Function unknown	-	no hit	-	-	-	PF07980.7	Bacteria	Bacteroidetes	Bacteroidia	Bacteroidales	Bacteroidaceae	Bacteroides	Bacteroides graminisolvens	0.00096705	0.00068651	0.000563644	0.00050161	0.000343704	0.000580359	0.000485338	0.000735974	0.000640622	0.000684659	0.000730888	0.000864031	0.000801519	0.000454359	0.00048559	0.000555655
A0A069D2D7	NA	COG1917	poorly characterized	S : Function unknown	Uncharacterized conserved protein, contains double-stranded beta-helix domain	no hit	-	-	-	PF07883.7	Bacteria	Bacteroidetes	Bacteroidia	Bacteroidales	Bacteroidaceae	Bacteroides	Bacteroides graminisolvens	0	0	0	0	0	0	0	0	0	0.000531169	0	0.000454762	0	0.000607296	0.000382317	0.000687615
A0A069D2D8	GH146	COG3533	poorly characterized	S : Function unknown	Uncharacterized protein conserved in bacteria	no hit	-	-	-	PF07944.8	Bacteria	Bacteroidetes	Bacteroidia	Bacteroidales	Bacteroidaceae	Bacteroides	Bacteroides graminisolvens	0.000161698	7.13e-05	0	0	0	6.76e-05	0	0	0.000268124	7.18e-05	7.03e-05	0	0.000240431	0	5.23e-05	6.21e-05
A0A069D2E1	NA	COG1012	metabolism	C : Energy production and conversion	NAD-dependent aldehyde dehydrogenases	no hit	-	-	-	PF00171.18	Bacteria	Bacteroidetes	Bacteroidia	Bacteroidales	Bacteroidaceae	Bacteroides	Bacteroides graminisolvens	0	0	0	0	0	0	0	0	0	4.49e-05	0	0	0	0	0	0
A0A069D2E2	NA	COG1561	poorly characterized	S : Function unknown	Uncharacterized stress-induced protein	TIGR00255	Hypothetical proteins	Conserved	TIGR00255 family protein	PF03755.9	Bacteria	Bacteroidetes	Bacteroidia	Bacteroidales	Bacteroidaceae	Bacteroides	Bacteroides graminisolvens	0.000308604	0.000385175	0.000396837	0.000474284	0.00039785	0.000427316	0.000428064	0.00045671	0.000247816	0.000355725	0.000347627	0.000426119	0.0002821	0.00034813	0.000421558	0.000167994
A0A069D2E7	NA	COG0569	metabolism	P : Inorganic ion	K+ transport systems, NAD-binding component	no hit	-	-	-	PF02254.14	Bacteria	Bacteroidetes	Bacteroidia	Bacteroidales	Bacteroidaceae	Bacteroides	Bacteroides graminisolvens	0.000267469	0.000238445	0.000282336	0.00030508	0.000378571	0.000302266	0.000533984	0.000431325	0	0.000224636	0	0	0	0.000202908	0	0
A0A069D2F1	NA	COG1629	metabolism	P : Inorganic ion	Outer membrane receptor proteins, mostly Fe transport	TIGR04056	Transport and binding proteins	Unknown substrate	TonB-linked outer membrane protein, SusC/RagA family	PF13715.2	Bacteria	Bacteroidetes	Bacteroidia	Bacteroidales	Bacteroidaceae	Bacteroides	Bacteroides graminisolvens	0.000396747	0.000289631	7.7e-05	5.08e-05	0.000126072	0.000151022	8.61e-05	8.49e-05	4.47e-05	0	0	0	0	0	5.86e-05	4.62e-05
A0A069D2F3	NA	COG3678	cellular processes and signaling	U : Intracellular trafficking	P pilus assembly/Cpx signaling pathway, periplasmic inhibitor/zinc-resistance associated protein	no hit	-	-	-	PF16231.1	Bacteria	Bacteroidetes	Bacteroidia	Bacteroidales	Bacteroidaceae	Bacteroides	Bacteroides graminisolvens	0.000323702	0.000643753	0.000499265	0.00102908	0.00050763	0	0.000532951	0.000879435	0.00033804	0.00107664	0.000974012	0.000718913	0.000488943	0.00138224	0.000312805	0.000371622
A0A069D2G1	NA	COG4289	poorly characterized	S : Function unknown	Uncharacterized protein conserved in bacteria	no hit	-	-	-	PF10022.5	Bacteria	Bacteroidetes	Bacteroidia	Bacteroidales	Bacteroidaceae	Bacteroides	Bacteroides graminisolvens	0.00040909	0.000374634	0.00024355	0.00039245	0.000398851	0.000159169	0	0.000225176	0.000374401	0.00031302	0.00029275	0.000413373	0.000234975	0.000223879	0.000364053	0.000390659
A0A069D2G2	NA	no hit	-	S : Function unknown	-	no hit	-	-	-	PF13715.2	Bacteria	Bacteroidetes	Bacteroidia	Bacteroidales	Bacteroidaceae	Bacteroides	Bacteroides graminisolvens	0	0.000102118	0.000158887	0.000191766	0	0	0	0	0	0.000135701	0	0	0	0	0	0
A0A069D2G5	NA	COG1629	metabolism	P : Inorganic ion	Outer membrane receptor proteins, mostly Fe transport	TIGR04056	Transport and binding proteins	Unknown substrate	TonB-linked outer membrane protein, SusC/RagA family	PF07715.11	Bacteria	Bacteroidetes	Bacteroidia	Bacteroidales	Bacteroidaceae	Bacteroides	Bacteroides graminisolvens	0.000972023	0.000589863	0.000651554	0.000773902	0.00100251	0.000748405	0.000641787	0.000507666	0.000490601	0.000549321	0.0005956	0.000822198	0.000541705	0.000490308	0.000479748	0.000507146
A0A069D2H3	GH31	COG1501	metabolism	G : Carbohydrate	Alpha-glucosidases, family 31 of glycosyl hydrolases	no hit	-	-	-	PF01055.22	Bacteria	Bacteroidetes	Bacteroidia	Bacteroidales	Bacteroidaceae	Bacteroides	Bacteroides graminisolvens	0.000277078	7.67e-05	6.8e-05	0	0.000158057	0	0	0	0.00019332	0.000124799	8.3e-05	0	0.000136476	0	0	0
A0A069D2H4	NA	COG0673	poorly characterized	R : General function prediction only	Predicted dehydrogenases and related proteins	TIGR01921	-	-	diaminopimelate dehydrogenase	PF16654.1	Bacteria	Bacteroidetes	Bacteroidia	Bacteroidales	Bacteroidaceae	Bacteroides	Bacteroides graminisolvens	0.000909815	0.000770832	0.00076335	0.000422229	0.00090601	0.000543652	0.000809418	0.000401198	0.000504715	0.00052204	0.000591879	0.000483709	0.000486155	0.000392343	0.000388494	0.000246512
A0A069D2H8	NA	no hit	-	S : Function unknown	-	no hit	-	-	-	PF13715.2	Bacteria	Bacteroidetes	Bacteroidia	Bacteroidales	Bacteroidaceae	Bacteroides	Bacteroides graminisolvens	0.000389646	0.000230257	0.000205652	0.00027363	0	0	0	0	0.000183627	0.000152946	0.000174146	0.0001922	0.000243411	0	0	0
A0A069D2I2	NA	COG0334	metabolism	E : Amino acid	Glutamate dehydrogenase/leucine dehydrogenase	no hit	-	-	-	PF00208.17	Bacteria	Bacteroidetes	Bacteroidia	Bacteroidales	Bacteroidaceae	Bacteroides	Bacteroides graminisolvens	0.000277409	0.000317405	0.000152198	0.000149757	0.000412566	0.000321389	0.000239053	0.000192618	0.000636329	0.000375885	0.000289571	0.000398228	0.000326684	0.000316462	0.000236494	0.000331446
A0A069D2I6	GH3	COG1472	metabolism	G : Carbohydrate	Beta-glucosidase-related glycosidases	no hit	-	-	-	PF00933.17	Bacteria	Bacteroidetes	Bacteroidia	Bacteroidales	Bacteroidaceae	Bacteroides	Bacteroides graminisolvens	0.000119472	0.000138138	0	0	0	0	0	0	0	0	0	0	0	0	0	0
A0A069D2I9	NA	COG0841	cellular processes and signaling	V : Defense mechanisms	Cation/multidrug efflux pump	no hit	-	-	-	PF00873.15	Bacteria	Bacteroidetes	Bacteroidia	Bacteroidales	Bacteroidaceae	Bacteroides	Bacteroides graminisolvens	0	0	0	0	0	0	0	0	0	0	0	0.00029939	0	0	0	0
A0A069D2J5	NA	no hit	-	S : Function unknown	-	no hit	-	-	-	no hit	Bacteria	Bacteroidetes	Bacteroidia	Bacteroidales	Bacteroidaceae	Bacteroides	Bacteroides graminisolvens	0.000305204	0.000301462	0.00034683	0	0	0	0	0	0	0	0	0	0	0.000289658	0	0
A0A069D2J7	NA	no hit	-	S : Function unknown	-	no hit	-	-	-	PF11680.4	Bacteria	Bacteroidetes	Bacteroidia	Bacteroidales	Bacteroidaceae	Bacteroides	Bacteroides graminisolvens	0	0	0	0	0	0	0	0	0.000552384	0.000301887	0	0.000356525	0.000265927	0.000309558	0	0
A0A069D2J9	NA	COG4221	poorly characterized	R : General function prediction only	Short-chain alcohol dehydrogenase of unknown specificity	no hit	-	-	-	PF00106.21	Bacteria	Bacteroidetes	Bacteroidia	Bacteroidales	Bacteroidaceae	Bacteroides	Bacteroides graminisolvens	0	0	0	0	0	0	0	0	0	0	0	0.000190679	0	0	0.000220867	0
A0A069D2K1	NA	COG1350	poorly characterized	R : General function prediction only	Predicted alternative tryptophan synthase beta-subunit (paralog of TrpB)	TIGR01415	Unknown function	Enzymes of unknown specificity	pyridoxal-phosphate dependent TrpB-like enzyme	PF00291.21	Bacteria	Bacteroidetes	Bacteroidia	Bacteroidales	Bacteroidaceae	Bacteroides	Bacteroides graminisolvens	0.00030121	0.000340323	0.000222216	0.000406141	0.000545067	0.000587925	0.000710479	0.000214155	0.000567933	0.00044125	0.000502309	0.00042092	0.000472937	0.000335455	0.000201095	0.00014176
A0A069D2K3	NA	COG2353	poorly characterized	S : Function unknown	Uncharacterized conserved protein	no hit	-	-	-	PF04264.9	Bacteria	Bacteroidetes	Bacteroidia	Bacteroidales	Bacteroidaceae	Bacteroides	Bacteroides graminisolvens	0	0.000365971	0.000648391	0.000417491	0.000512136	0.00046435	0	0.000445427	0.000397417	0.000665314	0.000371838	0.000664788	0.000420117	0.000357706	0	0.000244903
A0A069D2K7	NA	COG0648	information storage and processing	L : Replication	Endonuclease IV	TIGR00587	DNA metabolism	DNA replication, recombination, and repair	apurinic endonuclease (APN1)	PF01261.20	Bacteria	Bacteroidetes	Bacteroidia	Bacteroidales	Bacteroidaceae	Bacteroides	Bacteroides graminisolvens	0	0	0.000238625	0	0	0.000249911	0	0	0.000222075	0.000185797	0.000200385	0.000320486	0	0	0	0.000229224
A0A069D2K8	NA	no hit	-	S : Function unknown	-	no hit	-	-	-	PF16412.1	Bacteria	Bacteroidetes	Bacteroidia	Bacteroidales	Bacteroidaceae	Bacteroides	Bacteroides graminisolvens	0.000182601	0	0	0	0.000420214	0.000571718	0.000389228	0.000730958	0.000333591	0.000430935	0.00059221	0.000406051	0.000398987	0.000471722	0.000271173	0.000275644
A0A069D2K9	NA	no hit	-	S : Function unknown	-	no hit	-	-	-	no hit	Bacteria	Bacteroidetes	Bacteroidia	Bacteroidales	Bacteroidaceae	Bacteroides	Bacteroides graminisolvens	0	0	0	0	0.00032134	0.000466437	0.00034284	0	0	0	0	0	0	0	0	0
A0A069D2L5	NA	COG0265	cellular processes and signaling	O : Posttranslational modification	Trypsin-like serine proteases, typically periplasmic, contain C-terminal PDZ domain	no hit	-	-	-	PF13180.2	Bacteria	Bacteroidetes	Bacteroidia	Bacteroidales	Bacteroidaceae	Bacteroides	Bacteroides graminisolvens	0.00100801	0.00112899	0.00140021	0.00150187	0.00126511	0.00136099	0.00214256	0.00144555	0.00174006	0.00127754	0.001464	0.00152348	0.00123103	0.000936273	0.0018228	0.00144106
A0A069D2L7	NA	COG0536	poorly characterized	R : General function prediction only	Predicted GTPase	TIGR02729	Protein synthesis	Other	Obg family GTPase CgtA	PF01018.18	Bacteria	Bacteroidetes	Bacteroidia	Bacteroidales	Bacteroidaceae	Bacteroides	Bacteroides graminisolvens	0.000291084	0	0.000382938	0	0.000259964	0.000168243	0	0.000172659	0	0	0	0	0	0	0	0
A0A069D2M6	NA	COG0820	poorly characterized	R : General function prediction only	Predicted Fe-S-cluster redox enzyme	TIGR00048	Protein synthesis	tRNA and rRNA base modification	23S rRNA (adenine(2503)-C(2))-methyltransferase	PF04055.17	Bacteria	Bacteroidetes	Bacteroidia	Bacteroidales	Bacteroidaceae	Bacteroides	Bacteroides graminisolvens	0.000145354	0.000123406	0.000146121	0	0	0	0	0	0.000105773	0.000108672	0.000118294	0	0.000101882	0	0	0.00013749
A0A069D2N0	NA	COG2067	metabolism	I : Lipid	Long-chain fatty acid transport protein	no hit	-	-	-	no hit	Bacteria	Bacteroidetes	Bacteroidia	Bacteroidales	Bacteroidaceae	Bacteroides	Bacteroides graminisolvens	0.000332015	0.000508351	0.000725488	0.000521243	0.000442462	0.000430701	0.000389925	0.000472384	0.000354855	0.000517478	0.000798639	0.000810603	0.000545943	0.00042651	0.000340413	0.000345644
A0A069D2N2	NA	COG0086	information storage and processing	K : Transcription	DNA-directed RNA polymerase, beta' subunit/160 kD subunit	no hit	-	-	-	no hit	Bacteria	Bacteroidetes	Bacteroidia	Bacteroidales	Bacteroidaceae	Bacteroides	Bacteroides graminisolvens	0	0	0	0	0	0	0	0	0.000728911	0	0	0.000442471	0	0	0	0
A0A069D2N7	NA	COG0222	information storage and processing	J : Translation	Ribosomal protein L7/L12	TIGR00855	Protein synthesis	Ribosomal proteins: synthesis and modification	ribosomal protein bL12	PF00542.15	Bacteria	Bacteroidetes	Bacteroidia	Bacteroidales	Bacteroidaceae	Bacteroides	Bacteroides graminisolvens	0	0	0	0	0.000936871	0.00100711	0.000944748	0.000660036	0	0	0	0	0.000260244	0	0	0.000401047
A0A069D2N9	NA	no hit	-	S : Function unknown	-	no hit	-	-	-	no hit	Bacteria	Bacteroidetes	Bacteroidia	Bacteroidales	Bacteroidaceae	Bacteroides	Bacteroides graminisolvens	0	0	0	0	0	0	0	0	0	0	0.00015411	0.000165034	0	0	0	0.000175724
A0A069D2P2	NA	COG0050	information storage and processing	J : Translation	GTPases - translation elongation factors	TIGR00485	Protein synthesis	Translation factors	translation elongation factor Tu	PF00009.23	Bacteria	Bacteroidetes	Bacteroidia	Bacteroidales	Bacteroidaceae	Bacteroides	Bacteroides graminisolvens	0.00144188	0.00128786	0.00156246	0.00187604	0.00251782	0.0018111	0.00199494	0.00161092	0.000976427	0.00135235	0.00156515	0.0015988	0.000968904	0.00131433	0.00181241	0.00185835
A0A069D2Q1	NA	COG2096	poorly characterized	S : Function unknown	Uncharacterized conserved protein	TIGR00636	Biosynthesis of cofactors, prosthetic groups, and carriers	Heme, porphyrin, and cobalamin	ATP:cob(I)alamin adenosyltransferase	PF01923.14	Bacteria	Bacteroidetes	Bacteroidia	Bacteroidales	Bacteroidaceae	Bacteroides	Bacteroides graminisolvens	0	0	0	0	0.000358326	0	0	0	0	0	0	0	0	0	0	0
A0A069D2Q2	GH3	COG1472	metabolism	G : Carbohydrate	Beta-glucosidase-related glycosidases	no hit	-	-	-	PF01915.18	Bacteria	Bacteroidetes	Bacteroidia	Bacteroidales	Bacteroidaceae	Bacteroides	Bacteroides graminisolvens	0	0	0	0	0	0	0	0	0	5.22e-05	0	0	0	0	0	0
A0A069D2Q6	NA	no hit	-	S : Function unknown	-	no hit	-	-	-	PF03629.14	Bacteria	Bacteroidetes	Bacteroidia	Bacteroidales	Bacteroidaceae	Bacteroides	Bacteroides graminisolvens	0.000190916	0.000269449	0.000282794	0.000293413	0	0.000529163	0.000564214	0.00020499	0.000342157	0.000276226	0.000442787	0.000349069	0.000212521	0.000385279	0.000524875	0.000270445
A0A069D2R0	NA	COG0537	metabolism	F : Nucleotide	Diadenosine tetraphosphate (Ap4A) hydrolase and other HIT family hydrolases	no hit	-	-	-	PF01230.19	Bacteria	Bacteroidetes	Bacteroidia	Bacteroidales	Bacteroidaceae	Bacteroides	Bacteroides graminisolvens	0	0	0	0	0	0.000607595	0	0	0	0.00028156	0	0.000359457	0	0.000294358	0.000480715	0.000371622
A0A069D2R1	NA	COG2885	cellular processes and signaling	M : Cell wall	Outer membrane protein and related peptidoglycan-associated (lipo)proteins	no hit	-	-	-	PF00691.16	Bacteria	Bacteroidetes	Bacteroidia	Bacteroidales	Bacteroidaceae	Bacteroides	Bacteroides graminisolvens	0.0102353	0.00669024	0.0114645	0.00965438	0.00373768	0.0045065	0.00455995	0.00487362	0.00648142	0.00795678	0.00929301	0.00837591	0.00608605	0.00594156	0.00661676	0.0086687
A0A069D2S9	NA	COG0443	cellular processes and signaling	O : Posttranslational modification	Molecular chaperone	TIGR02350	Protein fate	Protein folding and stabilization	chaperone protein DnaK	PF00012.16	Bacteria	Bacteroidetes	Bacteroidia	Bacteroidales	Bacteroidaceae	Bacteroides	Bacteroides graminisolvens	0.000149579	0.000133348	0.000236033	0.000210085	0.000317569	0.000337745	0.000310221	0.000268504	0.000196754	0.000268445	0.000263315	0.000173147	0.000212518	0.000179264	0.000259697	0.000207364
A0A069D2T0	NA	no hit	-	S : Function unknown	-	no hit	-	-	-	PF14128.2	Bacteria	Bacteroidetes	Bacteroidia	Bacteroidales	Bacteroidaceae	Bacteroides	Bacteroides graminisolvens	0.000821705	0.000809473	0	0.00103845	0	0	0	0	0	0.00279132	0	0	0.00124116	0.00190124	0	0
A0A069D2T2	NA	COG1225	cellular processes and signaling	O : Posttranslational modification	Peroxiredoxin	no hit	-	-	-	PF00578.17	Bacteria	Bacteroidetes	Bacteroidia	Bacteroidales	Bacteroidaceae	Bacteroides	Bacteroides graminisolvens	0.000361942	0.000311571	0	0.000524802	0.00060342	0.00156208	0.00123787	0.00154858	0.000488947	0.00118943	0.000938463	0.00140967	0.000497207	0.000655717	0.000463171	0.000590189
A0A069D2T6	NA	COG0542	cellular processes and signaling	O : Posttranslational modification	ATPases with chaperone activity, ATP-binding subunit	TIGR03346	Protein fate	Protein folding and stabilization	ATP-dependent chaperone protein ClpB	PF07724.10	Bacteria	Bacteroidetes	Bacteroidia	Bacteroidales	Bacteroidaceae	Bacteroides	Bacteroides graminisolvens	0.000170179	0.000114348	0.000191647	0.000202425	9.59e-05	8.28e-05	0	0.000126216	4.2e-05	0.000116998	0.000209289	0.000182193	0	0.000104425	9.58e-05	8.46e-05
A0A069D2U1	NA	COG1862	cellular processes and signaling	U : Intracellular trafficking	Preprotein translocase subunit YajC	TIGR00739	Protein fate	Protein and peptide secretion and trafficking	preprotein translocase, YajC subunit	PF02699.11	Bacteria	Bacteroidetes	Bacteroidia	Bacteroidales	Bacteroidaceae	Bacteroides	Bacteroides graminisolvens	0	0	0	0	0	0	0.000715668	0	0	0	0.000389006	0.000771069	0.000310291	0.000345335	0.000744965	0.000471674
A0A069D2U2	NA	COG4775	cellular processes and signaling	M : Cell wall	Outer membrane protein/protective antigen OMA87	no hit	-	-	-	PF07244.11	Bacteria	Bacteroidetes	Bacteroidia	Bacteroidales	Bacteroidaceae	Bacteroides	Bacteroides graminisolvens	0	0.000129926	0	0	0	0	0	0	0	0	0	0	0	0	0	0
A0A069D2V0	GH97	no hit	-	S : Function unknown	-	no hit	-	-	-	PF10566.5	Bacteria	Bacteroidetes	Bacteroidia	Bacteroidales	Bacteroidaceae	Bacteroides	Bacteroides graminisolvens	0.00123402	0.000789252	0.000791045	0.00103476	0.00128385	0.00145695	0.00117751	0.00056349	0.00059899	0.000777368	0.000911309	0.00111278	0.000663913	0.000717148	0.000598395	0.000660238
A0A069D2V4	GH3	COG1472	metabolism	G : Carbohydrate	Beta-glucosidase-related glycosidases	no hit	-	-	-	PF00933.17	Bacteria	Bacteroidetes	Bacteroidia	Bacteroidales	Bacteroidaceae	Bacteroides	Bacteroides graminisolvens	0.00177324	0.00137231	0.000914035	0.000928469	0.00132623	0.00121608	0.00107515	0.000844336	0.000782406	0.000911578	0.0012293	0.00128109	0.000580285	0.000731372	0.00101911	0.00101401
A0A069D2V5	NA	COG2502	metabolism	E : Amino acid	Asparagine synthetase A	TIGR00669	Amino acid biosynthesis	Aspartate family	aspartate--ammonia ligase	PF03590.11	Bacteria	Bacteroidetes	Bacteroidia	Bacteroidales	Bacteroidaceae	Bacteroides	Bacteroides graminisolvens	0.000233845	0.000381762	0.000202931	0	0.000201223	0.000267733	0	0.000248866	0.000603152	0.000629049	0.000427323	0.000284616	0.000549064	0.000313644	0.000625221	0.000395542
A0A069D2V7	NA	COG1070	metabolism	G : Carbohydrate	Sugar (pentulose and hexulose) kinases	no hit	-	-	-	PF00370.17	Bacteria	Bacteroidetes	Bacteroidia	Bacteroidales	Bacteroidaceae	Bacteroides	Bacteroides graminisolvens	0.000523694	0.000621944	0.000481186	0.000344978	0.000182895	0.000394581	0.000357144	0.000364418	0.000600327	0.000793281	0.00074756	0.00093384	0.000575053	0.000628562	0.000514224	0.000791852
A0A069D2V8	NA	no hit	-	S : Function unknown	-	no hit	-	-	-	no hit	Bacteria	Bacteroidetes	Bacteroidia	Bacteroidales	Bacteroidaceae	Bacteroides	Bacteroides graminisolvens	0	0	0	0	0.00116172	0.000534317	0	0	0	0	0	0	0	0	0	0
A0A069D2W2	NA	COG0673	poorly characterized	R : General function prediction only	Predicted dehydrogenases and related proteins	no hit	-	-	-	PF01408.18	Bacteria	Bacteroidetes	Bacteroidia	Bacteroidales	Bacteroidaceae	Bacteroides	Bacteroides graminisolvens	0.00032232	0	0.000188678	0	0.000190361	0.000405181	0.000446932	0	0.000102768	0.000258044	0.000239056	0.000260127	9.17e-05	0.000102047	0.000181737	0.000133584
A0A069D2W6	NA	COG5587	poorly characterized	S : Function unknown	Uncharacterized conserved protein	TIGR02453	-	-	TIGR02453 family protein	PF09365.6	Bacteria	Bacteroidetes	Bacteroidia	Bacteroidales	Bacteroidaceae	Bacteroides	Bacteroides graminisolvens	0	0.000285297	0.000227594	0	0.000374066	0.000242492	0.000412124	0	0.000239613	0.000411002	0.000442882	0.000570286	0.000293091	0.000351632	0.000226017	0.00032069
A0A069D2X0	NA	no hit	-	S : Function unknown	-	no hit	-	-	-	PF13414.2	Bacteria	Bacteroidetes	Bacteroidia	Bacteroidales	Bacteroidaceae	Bacteroides	Bacteroides graminisolvens	0	0	0	0	0.00108954	0.000804525	0.000868317	0.000866678	0.000148284	0.000427452	0.000689098	0.000859327	0.00107929	0.00130076	0.00118138	0.000675692
A0A069D2X8	NA	COG1022	metabolism	I : Lipid	Long-chain acyl-CoA synthetases (AMP-forming)	no hit	-	-	-	PF00501.24	Bacteria	Bacteroidetes	Bacteroidia	Bacteroidales	Bacteroidaceae	Bacteroides	Bacteroides graminisolvens	0	0	0	0	0.000116941	0	0.000109632	0	0	0	0	0	0	0	0	0.000129595
A0A069D2Y3	NA	COG1846	information storage and processing	K : Transcription	Transcriptional regulators	no hit	-	-	-	PF01047.18	Bacteria	Bacteroidetes	Bacteroidia	Bacteroidales	Bacteroidaceae	Bacteroides	Bacteroides graminisolvens	0	0	0	0	0.00045275	0	0	0	0	0	0	0	0	0	0	0
A0A069D2Z4	NA	COG0468	information storage and processing	L : Replication	RecA/RadA recombinase	TIGR02012	DNA metabolism	DNA replication, recombination, and repair	protein RecA	PF00154.17	Bacteria	Bacteroidetes	Bacteroidia	Bacteroidales	Bacteroidaceae	Bacteroides	Bacteroides graminisolvens	0.00082144	0.000730731	0.000819073	0.00121936	0.000768345	0.00066988	0.000466558	0.000659966	0.000424595	0.000714713	0.000774917	0.00063818	0.000518546	0.000501397	0.000671761	0.000941248
A0A069D2Z9	NA	COG1109	metabolism	G : Carbohydrate	Phosphomannomutase	TIGR03990	Central intermediary metabolism	Amino sugars	phosphoglucosamine mutase	PF02878.12	Bacteria	Bacteroidetes	Bacteroidia	Bacteroidales	Bacteroidaceae	Bacteroides	Bacteroides graminisolvens	0.000368892	0.000213687	0.00043267	0.000299764	0.000430391	0.000231306	0.00027556	0.000242994	0.000466779	0.000303866	0.00036533	0.000407072	0.0003686	0.000361995	0.000533444	0.000357842
A0A069D300	NA	COG0781	information storage and processing	K : Transcription	Transcription termination factor	TIGR01951	Transcription	Transcription factors	transcription antitermination factor NusB	PF01029.14	Bacteria	Bacteroidetes	Bacteroidia	Bacteroidales	Bacteroidaceae	Bacteroides	Bacteroides graminisolvens	0.000436261	0	0.000343333	0	0.000335597	0.000365196	0.000383002	0.000332562	0.000418708	0.000600654	0.000481805	0.000312507	0.000379332	0.00055052	0.000557521	0.000381396
A0A069D302	NA	COG0664	cellular processes and signaling	T : Signal transduction	cAMP-binding proteins - catabolite gene activator and regulatory subunit of cAMP-dependent protein kinases	no hit	-	-	-	PF13545.2	Bacteria	Bacteroidetes	Bacteroidia	Bacteroidales	Bacteroidaceae	Bacteroides	Bacteroides graminisolvens	0.000342735	0.000190971	0.000377853	0.000481074	0.000303199	0.000241995	0	0.000248442	0.000315511	0.000350066	0.000394691	0.000281239	0.000158684	0.000337643	0.000370157	0.000221964
A0A069D303	NA	COG0223	information storage and processing	J : Translation	Methionyl-tRNA formyltransferase	TIGR00460	Protein synthesis	tRNA aminoacylation	methionyl-tRNA formyltransferase	PF00551.15	Bacteria	Bacteroidetes	Bacteroidia	Bacteroidales	Bacteroidaceae	Bacteroides	Bacteroides graminisolvens	0	0	0	0	0.000213398	0	0	0	0	0	0.0001921	0	0.000142477	0	0	0.00031675
A0A069D304	NA	COG0642	cellular processes and signaling	T : Signal transduction	Signal transduction histidine kinase	no hit	-	-	-	PF00072.20	Bacteria	Bacteroidetes	Bacteroidia	Bacteroidales	Bacteroidaceae	Bacteroides	Bacteroides graminisolvens	4.9e-05	7.27e-05	8.47e-05	0	0	0	0	0	3.74e-05	0	0	0	0	0	0	0
A0A069D305	NA	COG0537	metabolism	F : Nucleotide	Diadenosine tetraphosphate (Ap4A) hydrolase and other HIT family hydrolases	no hit	-	-	-	PF01230.19	Bacteria	Bacteroidetes	Bacteroidia	Bacteroidales	Bacteroidaceae	Bacteroides	Bacteroides graminisolvens	0	0	0	0	0	0.000380077	0	0	0	0	0	0	0	0	0	0
A0A069D312	GH16	COG2273	metabolism	G : Carbohydrate	Beta-glucanase/Beta-glucan synthetase	no hit	-	-	-	PF00722.17	Bacteria	Bacteroidetes	Bacteroidia	Bacteroidales	Bacteroidaceae	Bacteroides	Bacteroides graminisolvens	0.000265611	0.000227207	0	0.000314536	0.000352496	0	0.000251069	0	0.000119309	0	0.000113148	0.000183858	9.11e-05	0	0	0
A0A069D313	NA	COG3275	cellular processes and signaling	T : Signal transduction	Putative regulator of cell autolysis	no hit	-	-	-	PF13424.2	Bacteria	Bacteroidetes	Bacteroidia	Bacteroidales	Bacteroidaceae	Bacteroides	Bacteroides graminisolvens	0.00011136	6.26e-05	7.34e-05	0	0	0.00010469	9.22e-05	0	0.000100973	5.81e-05	6.22e-05	0.000104254	7.09e-05	9.22e-05	9.15e-05	7.2e-05
A0A069D314	NA	no hit	-	S : Function unknown	-	no hit	-	-	-	PF15889.1	Bacteria	Bacteroidetes	Bacteroidia	Bacteroidales	Bacteroidaceae	Bacteroides	Bacteroides graminisolvens	0	0	0.000189805	0	0	0	0	0	0	0	0	0	0	0	0	0
A0A069D315	NA	COG0657	metabolism	I : Lipid	Esterase/lipase	no hit	-	-	-	PF12695.3	Bacteria	Bacteroidetes	Bacteroidia	Bacteroidales	Bacteroidaceae	Bacteroides	Bacteroides graminisolvens	0	0	0	0	0	0	0	0	0.00023717	0.000258713	0.000383455	0.000328241	0.000115846	0.000136391	0.000265284	0.000169149
A0A069D317	NA	COG1629	metabolism	P : Inorganic ion	Outer membrane receptor proteins, mostly Fe transport	TIGR04056	Transport and binding proteins	Unknown substrate	TonB-linked outer membrane protein, SusC/RagA family	PF00593.20	Bacteria	Bacteroidetes	Bacteroidia	Bacteroidales	Bacteroidaceae	Bacteroides	Bacteroides graminisolvens	7.13e-05	5.29e-05	4.7e-05	6.25e-05	0.000653056	0.000636607	0.000316409	0.000217561	4.19e-05	4.94e-05	3.98e-05	5.99e-05	4.22e-05	4.76e-05	5.96e-05	4.61e-05
A0A069D318	NA	COG0436	metabolism	E : Amino acid	Aspartate/tyrosine/aromatic aminotransferase	no hit	-	-	-	PF00155.17	Bacteria	Bacteroidetes	Bacteroidia	Bacteroidales	Bacteroidaceae	Bacteroides	Bacteroides graminisolvens	0	0.000106294	0	0	0	0.000135104	0	0	9.14e-05	9.39e-05	0	0	8.15e-05	0	0	0
A0A069D321	NA	COG0568	information storage and processing	K : Transcription	DNA-directed RNA polymerase, sigma subunit (sigma70/sigma32)	TIGR02937	-	-	RNA polymerase sigma factor, sigma-70 family	PF04539.12	Bacteria	Bacteroidetes	Bacteroidia	Bacteroidales	Bacteroidaceae	Bacteroides	Bacteroides graminisolvens	0.00022432	0	0.000169777	0	0	0	0	0	0	0.000145857	0	0.000223354	0	0	0	0.00016441
A0A069D322	NA	no hit	-	S : Function unknown	-	no hit	-	-	-	PF05036.9	Bacteria	Bacteroidetes	Bacteroidia	Bacteroidales	Bacteroidaceae	Bacteroides	Bacteroides graminisolvens	0	0	0	0	0	0	0	0	0	0	0.000246451	0	0	0	0	0
A0A069D336	NA	COG0039	metabolism	C : Energy production and conversion	Malate/lactate dehydrogenases	TIGR01763	Energy metabolism	TCA cycle	malate dehydrogenase, NAD-dependent	PF00056.19	Bacteria	Bacteroidetes	Bacteroidia	Bacteroidales	Bacteroidaceae	Bacteroides	Bacteroides graminisolvens	0.00115004	0.00116782	0.00101212	0.00123648	0.00221301	0.00193668	0.00202152	0.00214255	0.000956928	0.00141076	0.00120852	0.00130195	0.000870509	0.00141528	0.00166747	0.00188067
A0A069D344	NA	no hit	-	S : Function unknown	-	TIGR04456	-	-	LruC domain	PF16130.1	Bacteria	Bacteroidetes	Bacteroidia	Bacteroidales	Bacteroidaceae	Bacteroides	Bacteroides graminisolvens	0	0	0	0	0	0	0	0	4.57e-05	4.69e-05	5.51e-05	5.99e-05	0	5.12e-05	0	0
A0A069D348	NA	COG4770	metabolism	I : Lipid	Acetyl/propionyl-CoA carboxylase, alpha subunit	no hit	-	-	-	PF00364.18	Bacteria	Bacteroidetes	Bacteroidia	Bacteroidales	Bacteroidaceae	Bacteroides	Bacteroides graminisolvens	0	0.000495677	0	0	0	0	0	0.000322974	0	0.000406395	0.000391958	0.000471713	0	0	0	0
A0A069D353	NA	COG0166	metabolism	G : Carbohydrate	Glucose-6-phosphate isomerase	no hit	-	-	-	PF00342.15	Bacteria	Bacteroidetes	Bacteroidia	Bacteroidales	Bacteroidaceae	Bacteroides	Bacteroides graminisolvens	0.000776243	0.000535998	0.00101561	0.000877044	0.00130531	0.0008821	0.00107271	0.000888034	0.000948041	0.00121685	0.00147977	0.0013753	0.00114839	0.00112951	0.00112652	0.00161573
A0A069D364	NA	COG2077	cellular processes and signaling	O : Posttranslational modification	Peroxiredoxin	no hit	-	-	-	PF08534.6	Bacteria	Bacteroidetes	Bacteroidia	Bacteroidales	Bacteroidaceae	Bacteroides	Bacteroides graminisolvens	0.00312888	0.00352176	0.00365357	0.0045819	0.00325808	0.002973	0.00267189	0.00240417	0.00204845	0.0034846	0.00342258	0.00359363	0.0023803	0.00259785	0.00316434	0.00323073
A0A069D365	NA	COG1463	metabolism	Q : Secondary metabolites	ABC-type transport system involved in resistance to organic solvents, periplasmic component	no hit	-	-	-	PF02470.16	Bacteria	Bacteroidetes	Bacteroidia	Bacteroidales	Bacteroidaceae	Bacteroides	Bacteroides graminisolvens	0.000142905	0.00013992	0.000167135	0.000222381	0	0	0	0.000363824	0.000158943	0.000132265	0.000187447	0.000213244	0.000113908	0.000120116	0.000167055	0.000157262
A0A069D366	NA	COG1559	poorly characterized	R : General function prediction only	Predicted periplasmic solute-binding protein	TIGR00247	Hypothetical proteins	Conserved	conserved hypothetical protein, YceG family	PF02618.12	Bacteria	Bacteroidetes	Bacteroidia	Bacteroidales	Bacteroidaceae	Bacteroides	Bacteroides graminisolvens	0	0	0	0	0	0	0	0	0	0.000158758	0	0	9.36e-05	0	0	0
A0A069D368	CBM48-GH13_14	COG1523	metabolism	G : Carbohydrate	Type II secretory pathway, pullulanase PulA and related glycosidases	no hit	-	-	-	PF00128.20	Bacteria	Bacteroidetes	Bacteroidia	Bacteroidales	Bacteroidaceae	Bacteroides	Bacteroides graminisolvens	0	0	0	0	0	0.000279274	0	0.000152959	0	0	0	0.000204871	0	0	0	0.000190339
A0A069D370	GH77	COG1640	metabolism	G : Carbohydrate	4-alpha-glucanotransferase	no hit	-	-	-	PF02446.13	Bacteria	Bacteroidetes	Bacteroidia	Bacteroidales	Bacteroidaceae	Bacteroides	Bacteroides graminisolvens	0.000252567	0.00017297	0.000209286	0.000272509	0.000274619	0.000730945	0.000384835	0	0	0	0.000165806	0.000191413	0.000139585	0	0	0
A0A069D374	NA	no hit	-	S : Function unknown	-	no hit	-	-	-	PF12985.3	Bacteria	Bacteroidetes	Bacteroidia	Bacteroidales	Bacteroidaceae	Bacteroides	Bacteroides graminisolvens	0	0	0	0	0	0	0	0	0.000131239	0.000154669	0.000124463	0.000139554	0.000131597	0.000117938	0	0
A0A069D377	NA	COG4783	poorly characterized	R : General function prediction only	Putative Zn-dependent protease, contains TPR repeats	no hit	-	-	-	PF13414.2	Bacteria	Bacteroidetes	Bacteroidia	Bacteroidales	Bacteroidaceae	Bacteroides	Bacteroides graminisolvens	0.000102247	9.09e-05	0.000107924	0.000143611	0	0	0	0	9.64e-05	8.54e-05	9.42e-05	0.000106079	7.36e-05	8.39e-05	0.000116408	0
A0A069D381	NA	COG3087	cellular processes and signaling	D : Cell cycle control	Cell division protein	no hit	-	-	-	PF05036.9	Bacteria	Bacteroidetes	Bacteroidia	Bacteroidales	Bacteroidaceae	Bacteroides	Bacteroides graminisolvens	0.000405256	0.000535318	0.000921955	0.0010253	0.00104644	0.000791274	0.00067177	0	0.00050585	0.00131483	0.00107133	0.00129429	0.000284133	0.00100325	0.000685444	0.00102062
A0A069D382	NA	COG0238	information storage and processing	J : Translation	Ribosomal protein S18	TIGR00165	Protein synthesis	Ribosomal proteins: synthesis and modification	ribosomal protein bS18	PF01084.16	Bacteria	Bacteroidetes	Bacteroidia	Bacteroidales	Bacteroidaceae	Bacteroides	Bacteroides graminisolvens	0.0011876	0.00218317	0.00111052	0	0	0.000594457	0	0	0.00113654	0.00188333	0.00106955	0.000527203	0.00097689	0.0017269	0.00157739	0.000552553
A0A069D384	GH5_21	no hit	-	S : Function unknown	-	no hit	-	-	-	PF00150.14	Bacteria	Bacteroidetes	Bacteroidia	Bacteroidales	Bacteroidaceae	Bacteroides	Bacteroides graminisolvens	0	0	0	0	0	0	0	0	0.000107771	0	0.000133314	7.59e-05	8.59e-05	0	0	0
A0A069D385	CE1	COG2382	metabolism	P : Inorganic ion	Enterochelin esterase and related enzymes	no hit	-	-	-	PF00756.16	Bacteria	Bacteroidetes	Bacteroidia	Bacteroidales	Bacteroidaceae	Bacteroides	Bacteroides graminisolvens	0	0	0	0	0	0	0	0.000157323	0	0.000106493	0	0	0	0	0	0
A0A069D387	NA	no hit	-	S : Function unknown	-	no hit	-	-	-	no hit	Bacteria	Bacteroidetes	Bacteroidia	Bacteroidales	Bacteroidaceae	Bacteroides	Bacteroides graminisolvens	0	0	0	0	0	0	0	0	0	0.000952947	0.0010197	0.00114333	0	0.000651792	0.000764511	0.000566522
A0A069D388	NA	COG0642	cellular processes and signaling	T : Signal transduction	Signal transduction histidine kinase	no hit	-	-	-	PF02518.22	Bacteria	Bacteroidetes	Bacteroidia	Bacteroidales	Bacteroidaceae	Bacteroides	Bacteroides graminisolvens	0.000370594	0.000260707	0.000411097	0.000460914	0.00030861	0.00029422	0.000231381	0.000269912	0.000433336	0.000487437	0.000468909	0.000624426	0.00025503	0.000250838	0.000495491	0.000197625
A0A069D3A2	NA	COG4206	metabolism	H : Coenzyme	Outer membrane cobalamin receptor protein	TIGR04056	Transport and binding proteins	Unknown substrate	TonB-linked outer membrane protein, SusC/RagA family	PF07715.11	Bacteria	Bacteroidetes	Bacteroidia	Bacteroidales	Bacteroidaceae	Bacteroides	Bacteroides graminisolvens	0	0	0	0	0.000260541	0	0	0.000108509	0	0	0	0	0	0	0	0
A0A069D3A7	GH32	COG1621	metabolism	G : Carbohydrate	Beta-fructosidases (levanase/invertase)	no hit	-	-	-	PF00251.16	Bacteria	Bacteroidetes	Bacteroidia	Bacteroidales	Bacteroidaceae	Bacteroides	Bacteroides graminisolvens	0.000265921	0.000232656	0.00043826	0.000389216	0.000520682	0.000471955	0.000567913	0.000467622	0.000292113	0.000171689	0.000320081	0.000159696	0.00014582	0.000168023	0.000142788	0.000159177
A0A069D3B0	NA	COG0009	information storage and processing	J : Translation	Putative translation factor (SUA5)	TIGR00057	Protein synthesis	tRNA and rRNA base modification	tRNA threonylcarbamoyl adenosine modification protein, Sua5/YciO/YrdC/YwlC family	PF01300.14	Bacteria	Bacteroidetes	Bacteroidia	Bacteroidales	Bacteroidaceae	Bacteroides	Bacteroides graminisolvens	0	0	0	0	0	0	0.000355301	0	0	0.000187707	0	0	0.000162981	0.00020252	0	0
A0A069D3B1	GH97	no hit	-	S : Function unknown	-	no hit	-	-	-	PF10566.5	Bacteria	Bacteroidetes	Bacteroidia	Bacteroidales	Bacteroidaceae	Bacteroides	Bacteroides graminisolvens	0.000165518	0.000129394	7.75e-05	0.000103094	0.0003049	0.000124165	0	0	0.000256828	0.000260108	0.000194318	0.000263426	8.59e-05	9.69e-05	7.74e-05	0.000100695
A0A069D3B4	NA	COG4799	metabolism	I : Lipid	Acetyl-CoA carboxylase, carboxyltransferase component (subunits alpha and beta)	no hit	-	-	-	PF01039.18	Bacteria	Bacteroidetes	Bacteroidia	Bacteroidales	Bacteroidaceae	Bacteroides	Bacteroides graminisolvens	0.000939705	0.00096688	0.00124075	0.000816253	0.000777016	0.000805611	0.000604654	0.000707931	0.000533101	0.000784703	0.000860271	0.001115	0.000471752	0.000505653	0.000511735	0.000535466
A0A069D3B5	NA	COG1196	cellular processes and signaling	D : Cell cycle control	Chromosome segregation ATPases	no hit	-	-	-	no hit	Bacteria	Bacteroidetes	Bacteroidia	Bacteroidales	Bacteroidaceae	Bacteroides	Bacteroides graminisolvens	0	0	0	0	0.00127838	0.00122571	0.00123176	0.0011268	0.0001978	0.000249397	0.000902775	0.00130973	0	0.000411194	0.000553471	0.000471405
A0A069D3B7	NA	COG0698	metabolism	G : Carbohydrate	Ribose 5-phosphate isomerase RpiB	TIGR00689	-	-	sugar-phosphate isomerase, RpiB/LacA/LacB family	PF02502.14	Bacteria	Bacteroidetes	Bacteroidia	Bacteroidales	Bacteroidaceae	Bacteroides	Bacteroides graminisolvens	0	0	0	0	0	0.000623233	0	0	0.000312037	0.000259902	0.000403244	0.000343457	0	0.000283581	0.000376863	0.000328821
A0A069D3C0	NA	COG0657	metabolism	I : Lipid	Esterase/lipase	no hit	-	-	-	PF07859.9	Bacteria	Bacteroidetes	Bacteroidia	Bacteroidales	Bacteroidaceae	Bacteroides	Bacteroides graminisolvens	0	0	0.000302869	0	0	0	0	0	0	0	0	0	0	0	0	0
A0A069D3C4	NA	no hit	-	S : Function unknown	-	no hit	-	-	-	PF07980.7	Bacteria	Bacteroidetes	Bacteroidia	Bacteroidales	Bacteroidaceae	Bacteroides	Bacteroides graminisolvens	0	9.52e-05	8.55e-05	0	0	0	0	0	0	0	0	0	0	0	0	0
A0A069D3D3	NA	COG0693	poorly characterized	R : General function prediction only	Putative intracellular protease/amidase	TIGR01383	Unknown function	General	DJ-1 family protein	PF01965.20	Bacteria	Bacteroidetes	Bacteroidia	Bacteroidales	Bacteroidaceae	Bacteroides	Bacteroides graminisolvens	0	0.000229491	0	0.000290318	0	0	0	0	0	0	0	0	0	0	0.000289739	0
A0A069D3D4	NA	no hit	-	S : Function unknown	-	no hit	-	-	-	PF16411.1	Bacteria	Bacteroidetes	Bacteroidia	Bacteroidales	Bacteroidaceae	Bacteroides	Bacteroides graminisolvens	0	0.000111563	0.00030764	0.000401129	0.000792457	0.000428488	0.000485757	0.000439245	0.000341489	0.000245692	0.000380762	0.00033577	0.000324862	0.000278515	0.00023547	0.000302813
A0A069D3D6	NA	COG1014	metabolism	C : Energy production and conversion	Pyruvate:ferredoxin oxidoreductase and related 2-oxoacid:ferredoxin oxidoreductases, gamma subunit	no hit	-	-	-	PF01558.14	Bacteria	Bacteroidetes	Bacteroidia	Bacteroidales	Bacteroidaceae	Bacteroides	Bacteroides graminisolvens	0.000895102	0.00125063	0.000735098	0.000445323	0.000645401	0.00108917	0.00101655	0.000961666	0.00114749	0.00146313	0.00133073	0.00140996	0.000587515	0.00121401	0.000832492	0.000915937
A0A069D3E0	NA	COG0360	information storage and processing	J : Translation	Ribosomal protein S6	TIGR00166	Protein synthesis	Ribosomal proteins: synthesis and modification	ribosomal protein bS6	PF01250.13	Bacteria	Bacteroidetes	Bacteroidia	Bacteroidales	Bacteroidaceae	Bacteroides	Bacteroides graminisolvens	0.000823338	0.000979959	0.000434552	0.000469558	0.00114638	0.00139689	0.00097939	0.000663865	0.00087326	0.00100529	0.000735955	0.000939093	0.000577448	0.000857062	0.00079114	0.000987432
A0A069D3E1	GH65	COG1554	metabolism	G : Carbohydrate	Trehalose and maltose hydrolases (possible phosphorylases)	no hit	-	-	-	PF03632.11	Bacteria	Bacteroidetes	Bacteroidia	Bacteroidales	Bacteroidaceae	Bacteroides	Bacteroides graminisolvens	0.000110553	5.52e-05	0	0	0	6.92e-05	8.13e-05	0	0	0	0	0	0	0	0	0
A0A069D3E5	NA	COG0480	information storage and processing	J : Translation	Translation elongation factors (GTPases)	TIGR00231	Unknown function	General	small GTP-binding protein domain	PF00009.23	Bacteria	Bacteroidetes	Bacteroidia	Bacteroidales	Bacteroidaceae	Bacteroides	Bacteroides graminisolvens	0.00127312	0.00117664	0.00183576	0.00176593	0.000852622	0.000745131	0.00103403	0.000774239	0.00151918	0.00121784	0.00134993	0.00175483	0.00119599	0.00120313	0.00148045	0.0013089
A0A069D3E8	NA	COG1132	cellular processes and signaling	V : Defense mechanisms	ABC-type multidrug transport system, ATPase and permease components	no hit	-	-	-	PF00664.19	Bacteria	Bacteroidetes	Bacteroidia	Bacteroidales	Bacteroidaceae	Bacteroides	Bacteroides graminisolvens	0	0	0	0	0	0	0	0	7.95e-05	0.000129014	0.000102782	0.000165867	5.75e-05	0	0	0
A0A069D3F8	NA	no hit	-	S : Function unknown	-	no hit	-	-	-	no hit	Bacteria	Bacteroidetes	Bacteroidia	Bacteroidales	Bacteroidaceae	Bacteroides	Bacteroides graminisolvens	0	0	0	0	0	0.00113684	0.00133628	0	0	0	0	0	0	0	0	0
A0A069D3G0	NA	no hit	-	S : Function unknown	-	no hit	-	-	-	no hit	Bacteria	Bacteroidetes	Bacteroidia	Bacteroidales	Bacteroidaceae	Bacteroides	Bacteroides graminisolvens	0.000296427	0.000345258	0.000446192	0.000528117	0.000219487	0.000119377	0.000234172	0.000257589	9.96e-05	0.00017268	0.000154656	0.000105911	0	0.000113141	9.22e-05	0
A0A069D3G4	NA	no hit	-	S : Function unknown	-	no hit	-	-	-	no hit	Bacteria	Bacteroidetes	Bacteroidia	Bacteroidales	Bacteroidaceae	Bacteroides	Bacteroides graminisolvens	0	0	0	0	0.000446714	0	0	0	0	0	0.000285883	0	0	0	0	0
A0A069D3G8	NA	no hit	-	S : Function unknown	-	no hit	-	-	-	PF16961.1	Bacteria	Bacteroidetes	Bacteroidia	Bacteroidales	Bacteroidaceae	Bacteroides	Bacteroides graminisolvens	0.000168888	0.00016536	0	0	0.00026485	0.000352552	0.000371146	0.000372742	0	0.000157157	0.000159908	0.000184604	0	0	0	0
A0A069D3H0	NA	no hit	-	S : Function unknown	-	no hit	-	-	-	no hit	Bacteria	Bacteroidetes	Bacteroidia	Bacteroidales	Bacteroidaceae	Bacteroides	Bacteroides graminisolvens	0.000273902	0.000270543	0.000320342	0.000346149	0.000744693	0.00051475	0	0.000524644	0.000231931	0.000601695	0.000457647	0.00101779	0.000218325	0.000422372	0.000264681	0.000467306
A0A069D3H2	NA	COG0290	information storage and processing	J : Translation	Translation initiation factor 3 (IF-3)	TIGR00168	Protein synthesis	Translation factors	translation initiation factor IF-3	PF00707.18	Bacteria	Bacteroidetes	Bacteroidia	Bacteroidales	Bacteroidaceae	Bacteroides	Bacteroides graminisolvens	0.000404091	0.000378517	0.000374465	0.000459603	0.00060096	0.000239604	0.000536138	0.000267314	0.000213112	0.000393716	0.000544259	0.000220244	0.000201314	0.000179816	0.000275998	0.000317815
A0A069D3I0	NA	COG0105	metabolism	F : Nucleotide	Nucleoside diphosphate kinase	no hit	-	-	-	PF00334.15	Bacteria	Bacteroidetes	Bacteroidia	Bacteroidales	Bacteroidaceae	Bacteroides	Bacteroides graminisolvens	0	0.000719986	0.000415011	0	0.000992926	0	0	0.000493162	0.000683114	0.00125172	0.00121623	0.00148173	0.000383701	0.000791646	0.00042692	0.000419266
A0A069D3I3	NA	no hit	-	S : Function unknown	-	no hit	-	-	-	PF12732.3	Bacteria	Bacteroidetes	Bacteroidia	Bacteroidales	Bacteroidaceae	Bacteroides	Bacteroides graminisolvens	0	0.000921209	0.00142426	0.00140557	0.00285014	0.00439669	0.00415998	0.00839785	0.00129182	0.00224864	0.00420864	0.00360484	0.00148081	0.00459104	0.00291432	0.00356122
A0A069D3I4	NA	no hit	-	S : Function unknown	-	no hit	-	-	-	no hit	Bacteria	Bacteroidetes	Bacteroidia	Bacteroidales	Bacteroidaceae	Bacteroides	Bacteroides graminisolvens	0	0	0	0	0	0	0	0.000444557	0.000226504	0.000335301	0.000282027	0.000240854	0	0	0	0
A0A069D3I5	NA	COG3064	cellular processes and signaling	M : Cell wall	Membrane protein involved in colicin uptake	TIGR01352	Transport and binding proteins	Cations and iron carrying compounds	TonB family C-terminal domain	PF03544.10	Bacteria	Bacteroidetes	Bacteroidia	Bacteroidales	Bacteroidaceae	Bacteroides	Bacteroides graminisolvens	0	0	0	0	0	0	0	0	0	0.000135642	0	0	0	0	0	0
A0A069D3J2	GH43_29	COG3507	metabolism	G : Carbohydrate	Beta-xylosidase	no hit	-	-	-	PF04616.10	Bacteria	Bacteroidetes	Bacteroidia	Bacteroidales	Bacteroidaceae	Bacteroides	Bacteroides graminisolvens	0.000267891	0	0.000232579	0.000263108	0	0	0	0	0.000204143	0	0.000136719	0.000145849	0.000140731	0	0	0.000155893
A0A069D3J5	NA	COG1566	cellular processes and signaling	V : Defense mechanisms	Multidrug resistance efflux pump	TIGR01730	Transport and binding proteins	Unknown substrate	efflux transporter, RND family, MFP subunit	PF16576.1	Bacteria	Bacteroidetes	Bacteroidia	Bacteroidales	Bacteroidaceae	Bacteroides	Bacteroides graminisolvens	0.000401206	0.000298258	0.000449422	0.000437814	0.000404877	0.00032327	0.000567371	0.000532438	0.000331875	0.000481849	0.000634351	0.000523753	0.000243693	0.000234775	0.000410353	0.0004364
A0A069D3J6	NA	COG2017	metabolism	G : Carbohydrate	Galactose mutarotase and related enzymes	no hit	-	-	-	PF01263.16	Bacteria	Bacteroidetes	Bacteroidia	Bacteroidales	Bacteroidaceae	Bacteroides	Bacteroides graminisolvens	0.000992856	0.000795696	0.000900659	0.00100529	0.000756745	0.000862922	0.00101865	0.000989197	0.00102945	0.000981485	0.00125263	0.00109913	0.000872216	0.000844879	0.000977605	0.00122102
A0A069D3J9	NA	COG0131	metabolism	E : Amino acid	Imidazoleglycerol-phosphate dehydratase	TIGR01261	Amino acid biosynthesis	Histidine family	histidinol-phosphatase	PF00475.14	Bacteria	Bacteroidetes	Bacteroidia	Bacteroidales	Bacteroidaceae	Bacteroides	Bacteroides graminisolvens	0.000171539	0.000112847	0.00012983	0	0	0	0	0	0.000119309	0.000175491	0.000186566	0.000253734	0.000234665	0.00016791	0.000171047	0.000173676
A0A069D3K0	NA	COG0489	cellular processes and signaling	D : Cell cycle control	ATPases involved in chromosome partitioning	no hit	-	-	-	PF10609.5	Bacteria	Bacteroidetes	Bacteroidia	Bacteroidales	Bacteroidaceae	Bacteroides	Bacteroides graminisolvens	0.000322277	0.000342521	0.000271594	0.000281555	0.000770895	0.00024218	0.000416492	0.000357589	0.000464758	0.000787692	0.000988841	0.000591298	0.000623484	0.000777976	0.000880239	0.000923279
A0A069D3K1	NA	COG2160	metabolism	G : Carbohydrate	L-arabinose isomerase	no hit	-	-	-	PF02610.11	Bacteria	Bacteroidetes	Bacteroidia	Bacteroidales	Bacteroidaceae	Bacteroides	Bacteroides graminisolvens	0.000814109	0.000646647	0.00100179	0.000806677	0.000661349	0.000606254	0.000687996	0.000722044	0.000914792	0.000823943	0.0011755	0.00107303	0.000845609	0.000752861	0.000793634	0.000740413
A0A069D3K6	NA	COG0021	metabolism	G : Carbohydrate	Transketolase	no hit	-	-	-	PF00456.17	Bacteria	Bacteroidetes	Bacteroidia	Bacteroidales	Bacteroidaceae	Bacteroides	Bacteroides graminisolvens	0	0	0	0	0	0	0	0	0	0.000482674	0.000525411	0	0	0	0	0
A0A069D3L0	NA	COG1592	metabolism	C : Energy production and conversion	Rubrerythrin	no hit	-	-	-	PF02915.13	Bacteria	Bacteroidetes	Bacteroidia	Bacteroidales	Bacteroidaceae	Bacteroides	Bacteroides graminisolvens	0.00120275	0.00144831	0.00133882	0.00139687	0.00142523	0.00183068	0.0016614	0.0021965	0.000362085	0.00107115	0.0012293	0.00147674	0.00030039	0.000843379	0.00107999	0.00115634
A0A069D3L4	NA	COG0103	information storage and processing	J : Translation	Ribosomal protein S9	no hit	-	-	-	PF00380.15	Bacteria	Bacteroidetes	Bacteroidia	Bacteroidales	Bacteroidaceae	Bacteroides	Bacteroides graminisolvens	0.000369859	0.000547621	0.00060523	0.000519469	0.000645848	0.000417978	0.000549606	0.000450781	0.000449687	0.000502535	0.000437864	0.00037069	0.000266083	0.000514766	0.000499778	0.000503912
A0A069D3L6	NA	COG1595	information storage and processing	K : Transcription	DNA-directed RNA polymerase specialized sigma subunit, sigma24 homolog	TIGR02937	-	-	RNA polymerase sigma factor, sigma-70 family	PF04542.10	Bacteria	Bacteroidetes	Bacteroidia	Bacteroidales	Bacteroidaceae	Bacteroides	Bacteroides graminisolvens	0	0.000255107	0.000302869	0	0	0	0	0	0	0.000343795	0	0	0	0	0	0.000297297
A0A069D3L8	NA	COG0503	metabolism	F : Nucleotide	Adenine/guanine phosphoribosyltransferases and related PRPP-binding proteins	TIGR01744	Purines, pyrimidines, nucleosides, and nucleotides	Salvage of nucleosides and nucleotides	xanthine phosphoribosyltransferase	PF00156.23	Bacteria	Bacteroidetes	Bacteroidia	Bacteroidales	Bacteroidaceae	Bacteroides	Bacteroides graminisolvens	0	0.000221356	0.00026441	0	0	0	0	0	0	0.000209245	0	0.000259864	0	0.000214561	0	0
A0A069D3M3	NA	COG0441	information storage and processing	J : Translation	Threonyl-tRNA synthetase	TIGR00418	Protein synthesis	tRNA aminoacylation	threonine--tRNA ligase	PF00587.21	Bacteria	Bacteroidetes	Bacteroidia	Bacteroidales	Bacteroidaceae	Bacteroides	Bacteroides graminisolvens	0.000205693	0.000173839	0.000181965	0.000222594	0.00012797	0.000579734	0.00024989	0.000179705	0.000393913	0.000407684	0.000563303	0.000389641	0.000266741	0.000291634	0.000288226	0.000320655
A0A069D3M6	NA	COG0673	poorly characterized	R : General function prediction only	Predicted dehydrogenases and related proteins	no hit	-	-	-	PF01408.18	Bacteria	Bacteroidetes	Bacteroidia	Bacteroidales	Bacteroidaceae	Bacteroides	Bacteroides graminisolvens	0	0	0	0	0	0	0	0	0.000247816	0.000135436	0.000347627	0.000159948	0	0.000122996	0	0
A0A069D3M7	NA	no hit	-	S : Function unknown	-	no hit	-	-	-	PF06082.7	Bacteria	Bacteroidetes	Bacteroidia	Bacteroidales	Bacteroidaceae	Bacteroides	Bacteroides graminisolvens	0.000293063	0.000534763	0.000434027	0.000399674	0.00035637	0	0.000374571	0.000130727	0.00062388	0.000679845	0.000874114	0.00071313	0.000648736	0.000512929	0.000387706	0.000461801
A0A069D3M8	NA	COG0363	metabolism	G : Carbohydrate	6-phosphogluconolactonase/Glucosamine-6-phosphate isomerase/deaminase	no hit	-	-	-	PF01182.16	Bacteria	Bacteroidetes	Bacteroidia	Bacteroidales	Bacteroidaceae	Bacteroides	Bacteroides graminisolvens	0.000364657	0.000360015	0.000677601	0.000825545	0.00029991	0.000295913	0.000243483	0.000261086	0.000138441	0.000353319	0.000272108	0.000352624	5.25e-05	0.000207266	0.000157596	0.000169235
A0A069D3N2	GH3	COG1472	metabolism	G : Carbohydrate	Beta-glucosidase-related glycosidases	no hit	-	-	-	PF00933.17	Bacteria	Bacteroidetes	Bacteroidia	Bacteroidales	Bacteroidaceae	Bacteroides	Bacteroides graminisolvens	0.00016305	0.000105136	0.000201558	0.00045917	0.000368659	0.000395067	0.000570883	0.000267939	0.000219809	0.000375738	0.000393472	0.000584338	0.000252812	0.00021007	0.000352139	0.000159987
A0A069D3N6	NA	COG0153	metabolism	G : Carbohydrate	Galactokinase	TIGR00131	Energy metabolism	Sugars	galactokinase	PF10509.5	Bacteria	Bacteroidetes	Bacteroidia	Bacteroidales	Bacteroidaceae	Bacteroides	Bacteroides graminisolvens	0.00154595	0.00194806	0.00191122	0.00230537	0.00107922	0.00190859	0.00208934	0.00188523	0.00132507	0.00195395	0.00199591	0.00172119	0.00126757	0.00174744	0.00171346	0.00199594
A0A069D3N8	NA	COG1165	metabolism	H : Coenzyme	2-succinyl-6-hydroxy-2,4-cyclohexadiene-1-carboxylate synthase	TIGR00173	Biosynthesis of cofactors, prosthetic groups, and carriers	Menaquinone and ubiquinone	2-succinyl-5-enolpyruvyl-6-hydroxy-3-cyclohexene-1-carboxylic-acid synthase	PF02776.14	Bacteria	Bacteroidetes	Bacteroidia	Bacteroidales	Bacteroidaceae	Bacteroides	Bacteroides graminisolvens	0	7.62e-05	8.77e-05	0	0	0	0	0	9.56e-05	9.89e-05	7.64e-05	8.56e-05	0	7.01e-05	0	0
A0A069D3P0	GH51	COG3534	metabolism	G : Carbohydrate	Alpha-L-arabinofuranosidase	no hit	-	-	-	PF06964.8	Bacteria	Bacteroidetes	Bacteroidia	Bacteroidales	Bacteroidaceae	Bacteroides	Bacteroides graminisolvens	0.000690299	0.000755688	0.000533959	0.000894526	0.000685347	0.00120344	0.000880487	0.000639502	0.000940483	0.00113649	0.00119355	0.00147273	0.000538751	0.000705645	0.000594937	0.000900049
A0A069D3P3	NA	COG0176	metabolism	G : Carbohydrate	Transaldolase	TIGR00875	Energy metabolism	Pentose phosphate pathway	fructose-6-phosphate aldolase	PF00923.15	Bacteria	Bacteroidetes	Bacteroidia	Bacteroidales	Bacteroidaceae	Bacteroides	Bacteroides graminisolvens	0	0	0	0	0.000451055	0.0002451	0.000430733	0	0	0	0	0	0.000156232	0.000286681	0	0.000593833
A0A069D3P5	NA	COG4146	poorly characterized	R : General function prediction only	Predicted symporter	TIGR00813	Transport and binding proteins	Cations and iron carrying compounds	transporter, solute:sodium symporter (SSS) family	PF00474.13	Bacteria	Bacteroidetes	Bacteroidia	Bacteroidales	Bacteroidaceae	Bacteroides	Bacteroides graminisolvens	0	0	0	0	0	0	0.000148091	0	0.000181577	5.86e-05	0	0.000112543	9.06e-05	6.13e-05	0	0
A0A069D3P8	NA	COG2825	cellular processes and signaling	M : Cell wall	Outer membrane protein	no hit	-	-	-	PF03938.10	Bacteria	Bacteroidetes	Bacteroidia	Bacteroidales	Bacteroidaceae	Bacteroides	Bacteroides graminisolvens	0.000699635	0.00103952	0.00106569	0.00124588	0.000737319	0.00149251	0.00210304	0.00187703	0.00121787	0.00144498	0.00152685	0.00180536	0.00123624	0.00144107	0.0016094	0.00159764
A0A069D3Q2	NA	COG1069	metabolism	C : Energy production and conversion	Ribulose kinase	TIGR01234	Energy metabolism	Sugars	ribulokinase	PF02782.12	Bacteria	Bacteroidetes	Bacteroidia	Bacteroidales	Bacteroidaceae	Bacteroides	Bacteroides graminisolvens	0.000262868	0.000479159	0.000541511	0.000629069	0.000888909	0.00057553	0.000729405	0.000648221	0.00108594	0.00104369	0.00101339	0.00118736	0.000874491	0.000631156	0.000969147	0.000813217
A0A069D3Q3	NA	COG0190	metabolism	H : Coenzyme	5,10-methylene-tetrahydrofolate dehydrogenase/Methenyl tetrahydrofolate cyclohydrolase	no hit	-	-	-	PF02882.15	Bacteria	Bacteroidetes	Bacteroidia	Bacteroidales	Bacteroidaceae	Bacteroides	Bacteroides graminisolvens	0	0	0	0	0	0.00027075	0.000249372	0.000194932	0.000217221	0.000215777	0	0.000157182	0.000229602	0.000172223	0	0
A0A069D3Q4	NA	COG1209	cellular processes and signaling	M : Cell wall	dTDP-glucose pyrophosphorylase	TIGR01207	Cell envelope	Biosynthesis and degradation of surface polysaccharides and lipopolysaccharides	glucose-1-phosphate thymidylyltransferase	PF00483.19	Bacteria	Bacteroidetes	Bacteroidia	Bacteroidales	Bacteroidaceae	Bacteroides	Bacteroides graminisolvens	0	0	0	0	0	0	0	0	0	0.000136634	0	0	0	0	0	0
A0A069D3Q7	NA	COG0021	metabolism	G : Carbohydrate	Transketolase	no hit	-	-	-	PF00456.17	Bacteria	Bacteroidetes	Bacteroidia	Bacteroidales	Bacteroidaceae	Bacteroides	Bacteroides graminisolvens	0.00140179	0.00152742	0.00156394	0.00190491	0.000941501	0.00125264	0.000936919	0.000650631	0.00181744	0.00179288	0.00213805	0.0023473	0.00136118	0.00154907	0.00175711	0.00216088
A0A069D3R1	NA	COG1629	metabolism	P : Inorganic ion	Outer membrane receptor proteins, mostly Fe transport	TIGR04056	Transport and binding proteins	Unknown substrate	TonB-linked outer membrane protein, SusC/RagA family	PF07715.11	Bacteria	Bacteroidetes	Bacteroidia	Bacteroidales	Bacteroidaceae	Bacteroides	Bacteroides graminisolvens	4.43e-05	5.27e-05	7.25e-05	0	0	0	0	0	0	0	0	0	0	0	0	0
A0A069D3R6	NA	COG0194	metabolism	F : Nucleotide	Guanylate kinase	TIGR03263	Purines, pyrimidines, nucleosides, and nucleotides	Nucleotide and nucleoside interconversions	guanylate kinase	PF00625.17	Bacteria	Bacteroidetes	Bacteroidia	Bacteroidales	Bacteroidaceae	Bacteroides	Bacteroides graminisolvens	0	0	0	0	0	0	0	0	0	0	0	0.000251049	0	0	0	0
A0A069D3R9	NA	COG1013	metabolism	C : Energy production and conversion	Pyruvate:ferredoxin oxidoreductase and related 2-oxoacid:ferredoxin oxidoreductases, beta subunit	no hit	-	-	-	PF02775.17	Bacteria	Bacteroidetes	Bacteroidia	Bacteroidales	Bacteroidaceae	Bacteroides	Bacteroides graminisolvens	0.000168223	0.000331647	0	0	0.000527615	0.000351293	0.000768264	0.00059844	0.000453227	0.000472223	0.000333209	0.000495724	0.000402879	0.000436956	0.000305025	0.00025394
A0A069D3S6	NA	COG0141	metabolism	E : Amino acid	Histidinol dehydrogenase	TIGR00069	Amino acid biosynthesis	Histidine family	histidinol dehydrogenase	PF00815.16	Bacteria	Bacteroidetes	Bacteroidia	Bacteroidales	Bacteroidaceae	Bacteroides	Bacteroides graminisolvens	0	0	0	0	0	0	0	0	0.000272689	0.000119544	9.86e-05	0	0.000163493	0	0	0.000117509
A0A069D3T5	NA	COG0171	metabolism	H : Coenzyme	NAD synthase	TIGR00552	Biosynthesis of cofactors, prosthetic groups, and carriers	Pyridine nucleotides	NAD+ synthetase	PF02540.13	Bacteria	Bacteroidetes	Bacteroidia	Bacteroidales	Bacteroidaceae	Bacteroides	Bacteroides graminisolvens	0	0	0	0	0.000100611	8.05e-05	0	0	0	0	0	0	4.85e-05	0	0	0
A0A069D3T6	NA	COG2067	metabolism	I : Lipid	Long-chain fatty acid transport protein	no hit	-	-	-	no hit	Bacteria	Bacteroidetes	Bacteroidia	Bacteroidales	Bacteroidaceae	Bacteroides	Bacteroides graminisolvens	0.00211315	0.00177506	0.00236062	0.00268376	0.00149368	0.00194667	0.00227297	0.00201805	0.00157313	0.00178166	0.00208363	0.00236287	0.00124654	0.00121954	0.00140414	0.00134955
A0A069D3T9	NA	COG1408	poorly characterized	R : General function prediction only	Predicted phosphohydrolases	no hit	-	-	-	PF00149.24	Bacteria	Bacteroidetes	Bacteroidia	Bacteroidales	Bacteroidaceae	Bacteroides	Bacteroides graminisolvens	0	0	0	0	0	0	0	0	0.000127956	0	0	0	0	0	0	0
A0A069D3U8	NA	no hit	-	S : Function unknown	-	no hit	-	-	-	no hit	Bacteria	Bacteroidetes	Bacteroidia	Bacteroidales	Bacteroidaceae	Bacteroides	Bacteroides graminisolvens	0	0	0	0	0	0	0.000836286	0.000648314	0	0.000854625	0.00109974	0.00159938	0.000545188	0.00114218	0.000936587	0.00106431
A0A069D3V4	NA	COG1410	metabolism	E : Amino acid	Methionine synthase I, cobalamin-binding domain	TIGR02082	Amino acid biosynthesis	Aspartate family	methionine synthase	PF02574.12	Bacteria	Bacteroidetes	Bacteroidia	Bacteroidales	Bacteroidaceae	Bacteroides	Bacteroides graminisolvens	0.000161705	0.000164208	0.000176584	0.000199038	0.000157849	8.39e-05	0	6.46e-05	6.55e-05	0.000227798	0.000165129	0.00016577	6.75e-05	0.000162214	0.000123686	0.00030341
A0A069D3V7	NA	COG4232	cellular processes and signaling	O : Posttranslational modification	Thiol:disulfide interchange protein	no hit	-	-	-	PF02683.11	Bacteria	Bacteroidetes	Bacteroidia	Bacteroidales	Bacteroidaceae	Bacteroides	Bacteroides graminisolvens	0	0	0	0	0	0.000102273	0	0	0	0	0	0	0	0	0	0
A0A069D3V9	NA	COG0855	metabolism	P : Inorganic ion	Polyphosphate kinase	TIGR03705	Central intermediary metabolism	Phosphorus compounds	polyphosphate kinase 1	PF13090.2	Bacteria	Bacteroidetes	Bacteroidia	Bacteroidales	Bacteroidaceae	Bacteroides	Bacteroides graminisolvens	0	0	0	0	0	7.75e-05	0	0	0	5.39e-05	0	6.88e-05	0	0	0	6.81e-05
A0A069D3W0	NA	COG0750	cellular processes and signaling	M : Cell wall	Predicted membrane-associated Zn-dependent proteases 1	TIGR00054	Protein fate	Degradation of proteins, peptides, and glycopeptides	RIP metalloprotease RseP	PF02163.18	Bacteria	Bacteroidetes	Bacteroidia	Bacteroidales	Bacteroidaceae	Bacteroides	Bacteroides graminisolvens	0	0	0	0	0	0	0	0	0.000111228	0	0	0	7.16e-05	0	0	0
A0A069D3W1	NA	COG0079	metabolism	E : Amino acid	Histidinol-phosphate/aromatic aminotransferase and cobyric acid decarboxylase	TIGR01141	Amino acid biosynthesis	Histidine family	histidinol-phosphate transaminase	PF00155.17	Bacteria	Bacteroidetes	Bacteroidia	Bacteroidales	Bacteroidaceae	Bacteroides	Bacteroides graminisolvens	0	0	0	0	0	0	0	0	0.0001936	0.000158299	0	0	0.000165557	0	0	0
A0A069D3W4	NA	COG0006	metabolism	E : Amino acid	Xaa-Pro aminopeptidase	no hit	-	-	-	PF00557.20	Bacteria	Bacteroidetes	Bacteroidia	Bacteroidales	Bacteroidaceae	Bacteroides	Bacteroides graminisolvens	0	0	0	0	0	0	0	0	0.000158943	0.000132265	0.000145864	0.000213644	0.000155866	0.000170495	0	0.00016406
A0A069D3W6	NA	COG0574	metabolism	G : Carbohydrate	Phosphoenolpyruvate synthase/pyruvate phosphate dikinase	no hit	-	-	-	PF01326.15	Bacteria	Bacteroidetes	Bacteroidia	Bacteroidales	Bacteroidaceae	Bacteroides	Bacteroides graminisolvens	5.04e-05	8.6e-05	8.52e-05	0.000119331	0	0	0	0	4.53e-05	7.34e-05	0	6.98e-05	4.55e-05	8.65e-05	0	0
A0A069D3X2	NA	COG1538	cellular processes and signaling	M : Cell wall	Outer membrane protein	TIGR01845	Cellular processes	Detoxification	efflux transporter, outer membrane factor (OMF) lipoprotein, NodT family	PF02321.14	Bacteria	Bacteroidetes	Bacteroidia	Bacteroidales	Bacteroidaceae	Bacteroides	Bacteroides graminisolvens	0	0	0	0	0	0.000276451	0.000277898	0.000221001	0.000374025	0.000174988	0.000374491	0.0004926	0.000178457	0.000264729	0.000279612	0.000714509
A0A069D3X9	NA	no hit	-	S : Function unknown	-	no hit	-	-	-	no hit	Bacteria	Bacteroidetes	Bacteroidia	Bacteroidales	Bacteroidaceae	Bacteroides	Bacteroides graminisolvens	0	0	0.000232862	0	0	0.000330468	0.000290764	0.000275978	0.000353259	0.000425636	0.000825474	0.000569695	0.000215758	0.000414632	0.000587541	0
A0A069D3Y8	NA	no hit	-	S : Function unknown	-	no hit	-	-	-	PF13306.2	Bacteria	Bacteroidetes	Bacteroidia	Bacteroidales	Bacteroidaceae	Bacteroides	Bacteroides graminisolvens	0	0	0.000191397	0.000207199	0.000193104	0	0	0.000218038	0.000160817	0.000236678	0.000199679	0.000134596	0.000232457	0.000189885	0.000182866	0.00018719
A0A069D3Y9	NA	COG1418	poorly characterized	R : General function prediction only	Predicted HD superfamily hydrolase	TIGR03319	Transcription	Degradation of RNA	ribonuclease Y	PF12072.4	Bacteria	Bacteroidetes	Bacteroidia	Bacteroidales	Bacteroidaceae	Bacteroides	Bacteroides graminisolvens	0.000125759	8.61e-05	0.000101986	0.000110202	0.000168711	0.000218223	0.000383265	0.00019746	0.000187286	0.000236812	0.000344454	0.000397172	7.11e-05	0.000173135	0.000178635	0.00020576
A0A069D3Z0	NA	COG1629	metabolism	P : Inorganic ion	Outer membrane receptor proteins, mostly Fe transport	no hit	-	-	-	PF14905.2	Bacteria	Bacteroidetes	Bacteroidia	Bacteroidales	Bacteroidaceae	Bacteroides	Bacteroides graminisolvens	0	0	0	0	0	0	0	0	0.000181818	0.000111039	8.18e-05	0.000162522	0.000146664	7.85e-05	0.000125359	0.000146513
A0A069D3Z1	NA	COG1629	metabolism	P : Inorganic ion	Outer membrane receptor proteins, mostly Fe transport	no hit	-	-	-	PF00593.20	Bacteria	Bacteroidetes	Bacteroidia	Bacteroidales	Bacteroidaceae	Bacteroides	Bacteroides graminisolvens	0	0	0	0	0	0	0	0	0	0	0	0	4.5e-05	0	0	0
A0A069D3Z4	NA	COG0205	metabolism	G : Carbohydrate	6-phosphofructokinase	TIGR02477	Energy metabolism	Glycolysis/gluconeogenesis	diphosphate--fructose-6-phosphate 1-phosphotransferase	PF00365.16	Bacteria	Bacteroidetes	Bacteroidia	Bacteroidales	Bacteroidaceae	Bacteroides	Bacteroides graminisolvens	0.000976208	0.00100017	0.000947097	0.0010682	0.000452565	0.000814381	0.000921565	0.000667025	0.000841269	0.000919182	0.00104926	0.00106563	0.000680254	0.000763569	0.000798051	0.00113551
A0A069D3Z5	NA	no hit	-	S : Function unknown	-	no hit	-	-	-	no hit	Bacteria	Bacteroidetes	Bacteroidia	Bacteroidales	Bacteroidaceae	Bacteroides	Bacteroides graminisolvens	0.0010744	0.00106373	0.00106956	0.000881073	0.000389576	0.00093316	0.000893483	0.000883742	0.000659089	0.00067972	0.000571884	0.000456195	0.000729072	0.000433832	0.000368921	0.000477949
A0A069D3Z7	NA	COG4771	metabolism	P : Inorganic ion	Outer membrane receptor for ferrienterochelin and colicins	TIGR04056	Transport and binding proteins	Unknown substrate	TonB-linked outer membrane protein, SusC/RagA family	PF07715.11	Bacteria	Bacteroidetes	Bacteroidia	Bacteroidales	Bacteroidaceae	Bacteroides	Bacteroides graminisolvens	0.00119127	0.000822995	0.000759159	0.000987441	0.000848305	0.000717651	0.000711607	0.000494416	0.000743173	0.000561075	0.000638957	0.000840061	0.000644604	0.000451049	0.000498493	0.000553526
A0A069D402	NA	COG3832	poorly characterized	S : Function unknown	Uncharacterized conserved protein	no hit	-	-	-	no hit	Bacteria	Bacteroidetes	Bacteroidia	Bacteroidales	Bacteroidaceae	Bacteroides	Bacteroides graminisolvens	0	0.000328848	0	0	0	0	0	0	0	0	0	0	0	0	0	0
A0A069D404	NA	no hit	-	S : Function unknown	-	no hit	-	-	-	PF16125.1	Bacteria	Bacteroidetes	Bacteroidia	Bacteroidales	Bacteroidaceae	Bacteroides	Bacteroides graminisolvens	0.000491542	0.000529634	0.000837447	0.000853695	0.000885249	0.00078509	0.000951378	0.000727941	0.000801224	0.000783083	0.000935068	0.0011478	0.000642616	0.000854355	0.00103063	0.0010298
A0A069D406	NA	no hit	-	S : Function unknown	-	no hit	-	-	-	PF13414.2	Bacteria	Bacteroidetes	Bacteroidia	Bacteroidales	Bacteroidaceae	Bacteroides	Bacteroides graminisolvens	0.00275424	0.00310157	0.003214	0.00279222	0.00192434	0.00243163	0.00246917	0.00197573	0.00307079	0.00349347	0.00339293	0.00340952	0.00266067	0.00293895	0.00333221	0.00341274
A0A069D409	NA	COG0526	cellular processes and signaling	O : Posttranslational modification	Thiol-disulfide isomerase and thioredoxins	no hit	-	-	-	PF13905.2	Bacteria	Bacteroidetes	Bacteroidia	Bacteroidales	Bacteroidaceae	Bacteroides	Bacteroides graminisolvens	0	0	0	0	0	0	0	0	0.000186501	0	0	0	0	0	0	0
A0A069D410	NA	COG0653	cellular processes and signaling	U : Intracellular trafficking	Preprotein translocase subunit SecA (ATPase, RNA helicase)	TIGR00963	Protein fate	Protein and peptide secretion and trafficking	preprotein translocase, SecA subunit	PF07517.10	Bacteria	Bacteroidetes	Bacteroidia	Bacteroidales	Bacteroidaceae	Bacteroides	Bacteroides graminisolvens	0.000345614	0.00035796	0.000257748	0.000258348	0.000242341	0.000243852	0.000267601	0.000317198	0.000272741	0.000276905	0.000230423	0.000226632	0.000341377	0.000171737	0.000132179	0.000132101
A0A069D413	NA	COG0085	information storage and processing	K : Transcription	DNA-directed RNA polymerase, beta subunit/140 kD subunit	TIGR02013	Transcription	DNA-dependent RNA polymerase	DNA-directed RNA polymerase, beta subunit	PF04561.10	Bacteria	Bacteroidetes	Bacteroidia	Bacteroidales	Bacteroidaceae	Bacteroides	Bacteroides graminisolvens	0.000317015	0.000248401	0.00024992	0.000223605	0.000497511	0.000194798	0.000215732	0.000244308	0.000398261	0.00024047	0.000191522	0.000209998	0.000259694	0.000175391	0.000112815	0.000152031
A0A069D416	GH3	COG1472	metabolism	G : Carbohydrate	Beta-glucosidase-related glycosidases	no hit	-	-	-	PF00933.17	Bacteria	Bacteroidetes	Bacteroidia	Bacteroidales	Bacteroidaceae	Bacteroides	Bacteroides graminisolvens	0	0	7.67e-05	7.68e-05	0	0	0	0	0	4.29e-05	0	0	0	0	0	0
A0A069D419	NA	COG0250	information storage and processing	K : Transcription	Transcription antiterminator	TIGR00922	Transcription	Transcription factors	transcription termination/antitermination factor NusG	PF02357.15	Bacteria	Bacteroidetes	Bacteroidia	Bacteroidales	Bacteroidaceae	Bacteroides	Bacteroides graminisolvens	0.000709674	0.00133454	0.00129966	0.00133879	0.00045927	0.00089187	0.00101427	0.000737076	0.000629796	0.0013666	0.00140517	0.0012995	0.00112406	0.00091698	0.00113547	0.00117843
A0A069D420	NA	no hit	-	S : Function unknown	-	no hit	-	-	-	no hit	Bacteria	Bacteroidetes	Bacteroidia	Bacteroidales	Bacteroidaceae	Bacteroides	Bacteroides graminisolvens	0	0	0	0	0	0	0	0	0	0.000204788	0.000292106	0	0.000200621	0	0	0.00017953
A0A069D421	NA	COG0735	metabolism	P : Inorganic ion	Fe2+/Zn2+ uptake regulation proteins	no hit	-	-	-	PF01475.15	Bacteria	Bacteroidetes	Bacteroidia	Bacteroidales	Bacteroidaceae	Bacteroides	Bacteroides graminisolvens	0	0.000347531	0.000409336	0	0	0	0	0	0	0.000230844	0	0	0	0.000223074	0	0.000292058
A0A069D424	NA	COG0334	metabolism	E : Amino acid	Glutamate dehydrogenase/leucine dehydrogenase	no hit	-	-	-	PF02812.14	Bacteria	Bacteroidetes	Bacteroidia	Bacteroidales	Bacteroidaceae	Bacteroides	Bacteroides graminisolvens	0.000237381	0.000230777	0.000183064	0.000295326	0.000372261	0.000346509	0.000523375	0.000675474	0.000398027	0.000619278	0.000653678	0.000927731	0.000348334	0.000448062	0.000505451	0.000364615
A0A069D427	NA	COG0281	metabolism	C : Energy production and conversion	Malic enzyme	no hit	-	-	-	PF01515.15	Bacteria	Bacteroidetes	Bacteroidia	Bacteroidales	Bacteroidaceae	Bacteroides	Bacteroides graminisolvens	0.000341916	0.000221771	0.000456878	0.00024612	8.79e-05	0.000280846	0.000369685	0.000282536	0.000399983	0.000292572	0.000440876	0.000405724	0.000395532	0.000177084	0.000239474	0.000315946
A0A069D429	NA	COG0577	cellular processes and signaling	V : Defense mechanisms	ABC-type antimicrobial peptide transport system, permease component	no hit	-	-	-	PF02687.17	Bacteria	Bacteroidetes	Bacteroidia	Bacteroidales	Bacteroidaceae	Bacteroides	Bacteroides graminisolvens	0	0	0	0	0	0	0	0	0.000268805	0.000347982	0.000465026	0.000290024	0.000145888	0.000117388	0.000165157	0.000286175
A0A069D430	NA	COG0119	metabolism	E : Amino acid	Isopropylmalate/homocitrate/citramalate synthases	TIGR00973	Amino acid biosynthesis	Pyruvate family	2-isopropylmalate synthase	PF00682.15	Bacteria	Bacteroidetes	Bacteroidia	Bacteroidales	Bacteroidaceae	Bacteroides	Bacteroides graminisolvens	0.000332378	0.000311105	0.000663427	0.000723273	0.000398479	0.000321797	0.000506029	0.000278453	0.000744177	0.000302245	0.000424022	0.000662388	0.000542913	0.00040743	0.000355462	0.00045695
A0A069D432	NA	COG1043	cellular processes and signaling	M : Cell wall	Acyl-[acyl carrier protein]--UDP-N-acetylglucosamine O-acyltransferase	no hit	-	-	-	PF13720.2	Bacteria	Bacteroidetes	Bacteroidia	Bacteroidales	Bacteroidaceae	Bacteroides	Bacteroides graminisolvens	0.000466471	0.000218677	0	0	0.000428335	0.00101657	0.00101534	0.000913146	0.000818573	0.000880445	0.000671213	0.0010679	0.0001805	0.000528269	0	0.000508361
A0A069D433	NA	COG1156	metabolism	C : Energy production and conversion	Archaeal/vacuolar-type H+-ATPase subunit B	no hit	-	-	-	PF00006.21	Bacteria	Bacteroidetes	Bacteroidia	Bacteroidales	Bacteroidaceae	Bacteroides	Bacteroides graminisolvens	0.00010807	0.000127724	0.000114094	0.000123286	0.000188741	0	0	0	0.000178716	0.000259992	0.000325996	0.000179418	0	0.000170368	0.000234789	0.000187688
A0A069D435	NA	COG0845	cellular processes and signaling	M : Cell wall	Membrane-fusion protein	TIGR01730	Transport and binding proteins	Unknown substrate	efflux transporter, RND family, MFP subunit	PF16576.1	Bacteria	Bacteroidetes	Bacteroidia	Bacteroidales	Bacteroidaceae	Bacteroides	Bacteroides graminisolvens	0.00166064	0.00165399	0.00187315	0.00136823	0.00182386	0.00185654	0.00157506	0.00171312	0.00202719	0.00210974	0.00207536	0.00233046	0.00172875	0.0014171	0.00150533	0.00182558
A0A069D437	GT35	COG0058	metabolism	G : Carbohydrate	Glucan phosphorylase	TIGR02094	-	-	alpha-glucan phosphorylases	PF11897.4	Bacteria	Bacteroidetes	Bacteroidia	Bacteroidales	Bacteroidaceae	Bacteroides	Bacteroides graminisolvens	0.000576337	0.000576479	0.000745385	0.000771071	0.000617488	0.000480417	0.00047611	0.000367	0.000532656	0.000357222	0.000517848	0.000551419	0.000492902	0.0003297	0.000397469	0.000380817
A0A069D443	NA	COG0836	cellular processes and signaling	M : Cell wall	Mannose-1-phosphate guanylyltransferase	no hit	-	-	-	PF00483.19	Bacteria	Bacteroidetes	Bacteroidia	Bacteroidales	Bacteroidaceae	Bacteroides	Bacteroides graminisolvens	0	0.000116212	0	0	0.000186131	0.00054479	0.000437	0.000313745	0.000224748	0.000296957	0.00027188	0.000314037	8.97e-05	0.00011141	0.00017312	0
A0A069D445	NA	COG0228	information storage and processing	J : Translation	Ribosomal protein S16	TIGR00002	Protein synthesis	Ribosomal proteins: synthesis and modification	ribosomal protein bS16	PF00886.15	Bacteria	Bacteroidetes	Bacteroidia	Bacteroidales	Bacteroidaceae	Bacteroides	Bacteroides graminisolvens	0.00124183	0.00120804	0.00160616	0.00165024	0.0015054	0.00143012	0.0013525	0.001251	0.00125346	0.000773914	0.000690143	0.000769792	0.00110194	0.00111897	0.000770737	0.00061933
A0A069D448	NA	COG1609	information storage and processing	K : Transcription	Transcriptional regulators	no hit	-	-	-	PF13407.2	Bacteria	Bacteroidetes	Bacteroidia	Bacteroidales	Bacteroidaceae	Bacteroides	Bacteroides graminisolvens	0	0	0	0	0	0	0	0	0	0.000111096	0.000176251	0.000133282	9.07e-05	0.000162444	0.000172886	0
A0A069D450	NA	no hit	-	S : Function unknown	-	no hit	-	-	-	no hit	Bacteria	Bacteroidetes	Bacteroidia	Bacteroidales	Bacteroidaceae	Bacteroides	Bacteroides graminisolvens	0	9.84e-05	0.00011676	0	0	0	0	0	0	0	0	0.000149242	0	0	0	0
A0A069D453	NA	no hit	-	S : Function unknown	-	no hit	-	-	-	no hit	Bacteria	Bacteroidetes	Bacteroidia	Bacteroidales	Bacteroidaceae	Bacteroides	Bacteroides graminisolvens	0.00020347	0.000302683	0	0.000257139	0.00039366	0	0.000351496	0	0	0.00018832	0.000201512	0.000225944	0.000162184	0.000171023	0	0
A0A069D460	NA	COG0006	metabolism	E : Amino acid	Xaa-Pro aminopeptidase	no hit	-	-	-	PF00557.20	Bacteria	Bacteroidetes	Bacteroidia	Bacteroidales	Bacteroidaceae	Bacteroides	Bacteroides graminisolvens	0.00014038	9.23e-05	0.000277447	0.00023632	0.000146624	0.000195177	0.000200196	0.000206354	0.000115864	0.000198756	0.000314914	0.000386117	0.000125671	0.000202675	0.000136365	0.000284267
A0A069D462	NA	COG0766	cellular processes and signaling	M : Cell wall	UDP-N-acetylglucosamine enolpyruvyl transferase	TIGR01072	Cell envelope	Biosynthesis and degradation of murein sacculus and peptidoglycan	UDP-N-acetylglucosamine 1-carboxyvinyltransferase	PF00275.16	Bacteria	Bacteroidetes	Bacteroidia	Bacteroidales	Bacteroidaceae	Bacteroides	Bacteroides graminisolvens	0	0	0	0	0	0.000185026	0	0	0.000197287	0.000125164	0.000140694	0.00025679	0.000131973	9.34e-05	0.0003012	0
A0A069D465	NA	COG0821	metabolism	I : Lipid	Enzyme involved in the deoxyxylulose pathway of isoprenoid biosynthesis	TIGR00612	Biosynthesis of cofactors, prosthetic groups, and carriers	Other	4-hydroxy-3-methylbut-2-en-1-yl diphosphate synthase	PF04551.10	Bacteria	Bacteroidetes	Bacteroidia	Bacteroidales	Bacteroidaceae	Bacteroides	Bacteroides graminisolvens	0.000722808	0.000694637	0.000582282	0.000656966	0.000475916	0.000368267	0.000522908	0.000566167	0.000363419	0.000531289	0.000611413	0.000522934	0.000288208	0.000275715	0.000258882	0.000335063
A0A069D467	NA	COG0634	metabolism	F : Nucleotide	Hypoxanthine-guanine phosphoribosyltransferase	TIGR01203	Purines, pyrimidines, nucleosides, and nucleotides	Salvage of nucleosides and nucleotides	hypoxanthine phosphoribosyltransferase	PF00156.23	Bacteria	Bacteroidetes	Bacteroidia	Bacteroidales	Bacteroidaceae	Bacteroides	Bacteroides graminisolvens	0	0	0	0	0	0.000272035	0	0	0	0	0	0	0	0.000197235	0.000322104	0.000338886
A0A069D472	NA	COG0386	cellular processes and signaling	O : Posttranslational modification	Glutathione peroxidase	no hit	-	-	-	PF00255.15	Bacteria	Bacteroidetes	Bacteroidia	Bacteroidales	Bacteroidaceae	Bacteroides	Bacteroides graminisolvens	0	0	0	0.000339617	0	0	0	0	0	0.000322543	0.000266147	0	0.000202957	0.000486846	0	0
A0A069D474	NA	COG0014	metabolism	E : Amino acid	Gamma-glutamyl phosphate reductase	no hit	-	-	-	no hit	Bacteria	Bacteroidetes	Bacteroidia	Bacteroidales	Bacteroidaceae	Bacteroides	Bacteroides graminisolvens	0.000157806	0.000283251	0.000244061	0.000179997	0.000223357	0.000178337	0.000246047	0.000314346	0.000260201	0.000175292	0.000186822	0.000212931	0.000113529	0.000219634	0.000275268	0.000313475
A0A069D482	NA	no hit	-	S : Function unknown	-	no hit	-	-	-	no hit	Bacteria	Bacteroidetes	Bacteroidia	Bacteroidales	Bacteroidaceae	Bacteroides	Bacteroides graminisolvens	0.000247496	0.000168017	0.000335364	0.000411613	0.00053821	0.000214864	0.000504458	0.000303852	0	0.000317648	0.000471615	0.000322053	0	0.000411912	0.000365386	0.000199718
A0A069D487	NA	COG1028	metabolism	I : Lipid	Dehydrogenases with different specificities (related to short-chain alcohol dehydrogenases)	TIGR01830	Fatty acid and phospholipid metabolism	Biosynthesis	3-oxoacyl-[acyl-carrier-protein] reductase	PF00106.21	Bacteria	Bacteroidetes	Bacteroidia	Bacteroidales	Bacteroidaceae	Bacteroides	Bacteroides graminisolvens	0.000763579	0.000965646	0.000796657	0.000896865	0.00027019	0.000645908	0.000706571	0	0.000914221	0.000991886	0.00101532	0.00114098	0.000823999	0.000903633	0.000679264	0.000926709
A0A069D489	NA	COG1505	metabolism	E : Amino acid	Serine proteases of the peptidase family S9A	no hit	-	-	-	PF02897.11	Bacteria	Bacteroidetes	Bacteroidia	Bacteroidales	Bacteroidaceae	Bacteroides	Bacteroides graminisolvens	0.000148698	0.000300116	0.000352824	0.00046284	0.000235523	0.000304746	0.000218917	0.000198568	0.000423551	0.000477943	0.000558397	0.000535804	0.000467517	0.000204129	0.000267963	0.000306027
A0A069D490	NA	COG0086	information storage and processing	K : Transcription	DNA-directed RNA polymerase, beta' subunit/160 kD subunit	TIGR02386	Transcription	DNA-dependent RNA polymerase	DNA-directed RNA polymerase, beta' subunit	PF04997.8	Bacteria	Bacteroidetes	Bacteroidia	Bacteroidales	Bacteroidaceae	Bacteroides	Bacteroides graminisolvens	0.00071656	0.000660646	0.000624226	0.000686195	0.000517757	0.000428221	0.000491113	0.000389233	0.000823281	0.000544824	0.00068686	0.000555008	0.000593234	0.000403307	0.000322953	0.00035183
A0A069D492	NA	COG2115	metabolism	G : Carbohydrate	Xylose isomerase	TIGR02630	Energy metabolism	Sugars	xylose isomerase	PF01261.20	Bacteria	Bacteroidetes	Bacteroidia	Bacteroidales	Bacteroidaceae	Bacteroides	Bacteroides graminisolvens	0.00108105	0.00102635	0.00101804	0.00107267	0.00124469	0.00122149	0.00126629	0.00132295	0.00118895	0.00128491	0.00141196	0.00161842	0.00105999	0.00101055	0.0013878	0.00141552
A0A069D493	NA	COG2873	metabolism	E : Amino acid	O-acetylhomoserine sulfhydrylase	TIGR01326	Amino acid biosynthesis	Aspartate family	O-acetylhomoserine aminocarboxypropyltransferase/cysteine synthase	PF01053.16	Bacteria	Bacteroidetes	Bacteroidia	Bacteroidales	Bacteroidaceae	Bacteroides	Bacteroides graminisolvens	0.000110878	9.89e-05	0.000117795	0.000155719	0.000156925	0	0	0	0.000178698	0.000127235	0.000170958	0.000166287	7.98e-05	9.1e-05	9.67e-05	0.000114881
A0A069D494	NA	COG0081	information storage and processing	J : Translation	Ribosomal protein L1	TIGR01169	Protein synthesis	Ribosomal proteins: synthesis and modification	ribosomal protein uL1	PF00687.17	Bacteria	Bacteroidetes	Bacteroidia	Bacteroidales	Bacteroidaceae	Bacteroides	Bacteroides graminisolvens	0.00040812	0.000486492	0.000582552	0.000441774	0.000423836	0.00030722	0.000425987	0.000406482	0.000395561	0.000340924	0.000298657	0.000416989	0.000347683	0.000542795	0.00027351	0
A0A069D495	NA	COG1043	cellular processes and signaling	M : Cell wall	Acyl-[acyl carrier protein]--UDP-N-acetylglucosamine O-acyltransferase	no hit	-	-	-	PF00132.20	Bacteria	Bacteroidetes	Bacteroidia	Bacteroidales	Bacteroidaceae	Bacteroides	Bacteroides graminisolvens	0.00138648	0.000731788	0	0.000863533	0.00261066	0.00069482	0	0	0	0.00134898	0.00109915	0.00125329	0	0.000504614	0	0
A0A069D496	NA	no hit	-	S : Function unknown	-	no hit	-	-	-	PF03629.14	Bacteria	Bacteroidetes	Bacteroidia	Bacteroidales	Bacteroidaceae	Bacteroides	Bacteroides graminisolvens	0.000390827	0.00089541	0.000800609	0.000803307	0.000257534	0.000666681	0.000841055	0.000631879	0.000781789	0.00136403	0.00158044	0.00154093	0.000318064	0.000959576	0.000926491	0.00124659
A0A069D4A0	NA	COG0778	metabolism	C : Energy production and conversion	Nitroreductase	no hit	-	-	-	PF00881.20	Bacteria	Bacteroidetes	Bacteroidia	Bacteroidales	Bacteroidaceae	Bacteroides	Bacteroides graminisolvens	0	0.000198536	0.000225843	0	0	0.000248519	0	0	0.000168285	0.00026682	0.000393651	0.000421591	0.000317546	0.000361445	0.000297542	0.000456317
A0A069D4A3	NA	COG2731	metabolism	G : Carbohydrate	Beta-galactosidase, beta subunit	TIGR00022	Unknown function	General	YhcH/YjgK/YiaL family protein	PF04074.8	Bacteria	Bacteroidetes	Bacteroidia	Bacteroidales	Bacteroidaceae	Bacteroides	Bacteroides graminisolvens	0	0	0	0	0.00045275	0.0006024	0.000810604	0.000637188	0	0	0	0	0.000388096	0.00097067	0.00113823	0.00152233
A0A069D4A6	NA	COG2220	poorly characterized	R : General function prediction only	Predicted Zn-dependent hydrolases of the beta-lactamase fold	no hit	-	-	-	PF13483.2	Bacteria	Bacteroidetes	Bacteroidia	Bacteroidales	Bacteroidaceae	Bacteroides	Bacteroides graminisolvens	0	0	0.00032279	0	0.000558392	0.000520038	0.000670911	0.000480833	0.000340336	0.000597579	0.00040985	0.000716146	0.000283822	0.00026166	0.000322818	0.000270645
A0A069D4A8	NA	COG0156	metabolism	H : Coenzyme	7-keto-8-aminopelargonate synthetase and related enzymes	no hit	-	-	-	PF00155.17	Bacteria	Bacteroidetes	Bacteroidia	Bacteroidales	Bacteroidaceae	Bacteroides	Bacteroides graminisolvens	0	0	0	0.000203447	0.000209819	0.000135613	0.000303449	0.000151297	0.00046247	0.000688303	0.000503414	0.00059715	0.000313933	0.000363702	0.000472826	0.000412713
A0A069D4A9	NA	COG1090	poorly characterized	R : General function prediction only	Predicted nucleoside-diphosphate sugar epimerase	TIGR01777	Hypothetical proteins	Conserved	TIGR01777 family protein	PF08212.8	Bacteria	Bacteroidetes	Bacteroidia	Bacteroidales	Bacteroidaceae	Bacteroides	Bacteroides graminisolvens	0.000328004	0	0	0	0.000459216	0.000370508	0.000290093	0.000208378	0.000184583	0.000145569	0.000148284	0.000252847	0	0	0.000142123	0
A0A069D4B4	NA	COG2197	cellular processes and signaling	T : Signal transduction	Response regulator containing a CheY-like receiver domain and an HTH DNA-binding domain	no hit	-	-	-	PF00196.15	Bacteria	Bacteroidetes	Bacteroidia	Bacteroidales	Bacteroidaceae	Bacteroides	Bacteroides graminisolvens	0.000196003	0.0001936	0	0	0	0.0002451	0	0	0	0.000181409	0	0.000214242	0	0.000164747	0	0
A0A069D4C1	NA	COG0775	metabolism	F : Nucleotide	Nucleoside phosphorylase	no hit	-	-	-	PF01048.16	Bacteria	Bacteroidetes	Bacteroidia	Bacteroidales	Bacteroidaceae	Bacteroides	Bacteroides graminisolvens	0	0.000227049	0.000258278	0	0	0	0	0	0	0.000210358	0.000225093	0.000247477	0	0.000191036	0	0.000250113
A0A069D4C6	NA	COG0312	poorly characterized	R : General function prediction only	Predicted Zn-dependent proteases and their inactivated homologs	no hit	-	-	-	PF01523.12	Bacteria	Bacteroidetes	Bacteroidia	Bacteroidales	Bacteroidaceae	Bacteroides	Bacteroides graminisolvens	0.000526585	0.000957516	0.000956838	0.000977045	0.000945044	0.000638987	0.00088021	0.000958436	0.000926199	0.00151247	0.00137437	0.0017126	0.000777409	0.00149956	0.00114088	0.00151245
A0A069D4C8	NA	COG1225	cellular processes and signaling	O : Posttranslational modification	Peroxiredoxin	no hit	-	-	-	PF14289.2	Bacteria	Bacteroidetes	Bacteroidia	Bacteroidales	Bacteroidaceae	Bacteroides	Bacteroides graminisolvens	0.000420492	0.000369436	0.000956281	0.000452662	0.000647535	0.000279102	0.000590436	0.000348196	0.000916321	0.00103153	0.00083413	0.000359075	0.00071628	0.000475598	0.000605515	0.000168409
A0A069D4D3	NA	COG0540	metabolism	F : Nucleotide	Aspartate carbamoyltransferase, catalytic chain	TIGR00670	Purines, pyrimidines, nucleosides, and nucleotides	Pyrimidine ribonucleotide biosynthesis	aspartate carbamoyltransferase	PF02729.17	Bacteria	Bacteroidetes	Bacteroidia	Bacteroidales	Bacteroidaceae	Bacteroides	Bacteroides graminisolvens	0.000214929	0	0.000213971	0.000332765	0.000217556	0.000173705	0.00030487	0.00036449	0.00018118	0.000285061	0.000501333	0.000255145	0.000210303	0.000190702	0.000297073	0.000470462
A0A069D4D4	NA	COG2234	poorly characterized	R : General function prediction only	Predicted aminopeptidases	no hit	-	-	-	PF04389.13	Bacteria	Bacteroidetes	Bacteroidia	Bacteroidales	Bacteroidaceae	Bacteroides	Bacteroides graminisolvens	0.00037641	0.000129066	0.000552349	0.000495406	0.000457724	0.000217967	0.000493666	0.000462748	0.00041507	0.000442575	0.000388233	0.000524882	0.000246674	0.000303261	0.000360829	0.000840403
A0A069D4D5	NA	COG1314	cellular processes and signaling	U : Intracellular trafficking	Preprotein translocase subunit SecG	TIGR00810	Protein fate	Protein and peptide secretion and trafficking	preprotein translocase, SecG subunit	PF03840.10	Bacteria	Bacteroidetes	Bacteroidia	Bacteroidales	Bacteroidaceae	Bacteroides	Bacteroides graminisolvens	0	0	0	0	0	0	0	0	0	0	0	0	0	0	0.000382317	0.000460461
A0A069D4D7	NA	COG1995	metabolism	H : Coenzyme	Pyridoxal phosphate biosynthesis protein	TIGR00557	Biosynthesis of cofactors, prosthetic groups, and carriers	Pyridoxine	4-hydroxythreonine-4-phosphate dehydrogenase PdxA	PF04166.8	Bacteria	Bacteroidetes	Bacteroidia	Bacteroidales	Bacteroidaceae	Bacteroides	Bacteroides graminisolvens	0.000363834	0.000287142	0.000273827	0.000328578	0.000226489	0.000293157	0.000306327	0.000265083	0.000651805	0.000910824	0.000727478	0.000645249	0.000426649	0.00052545	0.000585809	0.000628409
A0A069D4D8	NA	COG0112	metabolism	E : Amino acid	Glycine/serine hydroxymethyltransferase	no hit	-	-	-	PF00464.15	Bacteria	Bacteroidetes	Bacteroidia	Bacteroidales	Bacteroidaceae	Bacteroides	Bacteroides graminisolvens	0.000338378	0.000424933	0.000549158	0.00047629	0.000227111	0.000392114	0.000501563	0.000465049	0.000469865	0.000836925	0.000786303	0.000611035	0.000379398	0.000418488	0.000508954	0.000680028
A0A069D4D9	NA	COG0136	metabolism	E : Amino acid	Aspartate-semialdehyde dehydrogenase	TIGR01296	Amino acid biosynthesis	Aspartate family	aspartate-semialdehyde dehydrogenase	PF02774.14	Bacteria	Bacteroidetes	Bacteroidia	Bacteroidales	Bacteroidaceae	Bacteroides	Bacteroides graminisolvens	0.00112719	0.00108788	0.000998682	0.0013464	0.000937538	0.00137912	0.00106488	0.000438977	0.0015662	0.00161929	0.00147529	0.00196745	0.00134953	0.00120999	0.00110581	0.00124645
A0A069D4E2	NA	COG1151	metabolism	C : Energy production and conversion	6Fe-6S prismane cluster-containing protein	TIGR01703	Cellular processes	Detoxification	hydroxylamine reductase	PF03063.16	Bacteria	Bacteroidetes	Bacteroidia	Bacteroidales	Bacteroidaceae	Bacteroides	Bacteroides graminisolvens	0.00167141	0.00145556	0.00187998	0.00191051	0.0013093	0.00128542	0.00145439	0.000982757	0.000792997	0.00131979	0.00149278	0.00157505	0.000480164	0.00100438	0.00103352	0.00120814
A0A069D4E3	NA	COG0056	metabolism	C : Energy production and conversion	F0F1-type ATP synthase, alpha subunit	no hit	-	-	-	PF00306.23	Bacteria	Bacteroidetes	Bacteroidia	Bacteroidales	Bacteroidaceae	Bacteroides	Bacteroides graminisolvens	0	0	0.000579631	0	0.00102995	0.000836527	0.00109921	0.000761255	0.000711771	0.00115767	0.000781103	0.00112462	0.00114898	0.00100302	0.00138575	0.000752362
A0A069D4E4	NA	COG0572	metabolism	F : Nucleotide	Uridine kinase	no hit	-	-	-	PF00485.14	Bacteria	Bacteroidetes	Bacteroidia	Bacteroidales	Bacteroidaceae	Bacteroides	Bacteroides graminisolvens	0.000212623	0.000227314	0.000174349	0.000184007	0.000296835	0.00028823	0.000238688	0.000198992	0.000439932	0.000404222	0.000501362	0.000452328	0.000309083	0.000225488	0.000253018	0.000442768
A0A069D4E5	NA	COG3119	metabolism	P : Inorganic ion	Arylsulfatase A and related enzymes	no hit	-	-	-	PF01663.18	Bacteria	Bacteroidetes	Bacteroidia	Bacteroidales	Bacteroidaceae	Bacteroides	Bacteroides graminisolvens	0	0	0	0	0	0	0	0	0	0	0	0	6.63e-05	7.64e-05	0	0
A0A069D4E9	NA	COG0085	information storage and processing	K : Transcription	DNA-directed RNA polymerase, beta subunit/140 kD subunit	no hit	-	-	-	PF00562.24	Bacteria	Bacteroidetes	Bacteroidia	Bacteroidales	Bacteroidaceae	Bacteroides	Bacteroides graminisolvens	0.00100555	0.00095409	0.000874808	0.00109725	0.000723576	0.000507103	0.000382537	0.000368912	0.000862445	0.000790306	0.000791661	0.000823313	0.000768294	0.000752334	0.000635147	0.000646993
A0A069D4F1	NA	COG0225	cellular processes and signaling	O : Posttranslational modification	Peptide methionine sulfoxide reductase	TIGR00401	Protein fate	Protein modification and repair	peptide-methionine (S)-S-oxide reductase	PF01625.17	Bacteria	Bacteroidetes	Bacteroidia	Bacteroidales	Bacteroidaceae	Bacteroides	Bacteroides graminisolvens	0.000294049	0.000259852	0.000317178	0.000335399	0	0	0	0.000358385	0.000277151	0.000483176	0.000262842	0.000600881	0.000200436	0.000241338	0.000339547	0.000313112
A0A069D4F2	NA	COG0080	information storage and processing	J : Translation	Ribosomal protein L11	TIGR01632	Protein synthesis	Ribosomal proteins: synthesis and modification	ribosomal protein uL11	PF03946.10	Bacteria	Bacteroidetes	Bacteroidia	Bacteroidales	Bacteroidaceae	Bacteroides	Bacteroides graminisolvens	0.000419228	0	0.00065541	0	0.0014592	0.00084954	0.000722038	0.000536029	0.000467633	0.000570455	0.000287874	0.000422814	0.000451745	0.000446177	0.000679586	0.000908306
A0A069D4F4	NA	COG0227	information storage and processing	J : Translation	Ribosomal protein L28	TIGR00009	Protein synthesis	Ribosomal proteins: synthesis and modification	ribosomal protein bL28	PF00830.15	Bacteria	Bacteroidetes	Bacteroidia	Bacteroidales	Bacteroidaceae	Bacteroides	Bacteroides graminisolvens	0.00269734	0.00164727	0.00192093	0.00155997	0.00192253	0.00186562	0.00185893	0.000951681	0.00129277	0.00165251	0.00131655	0.000742784	0.000939442	0.000730215	0	0
A0A069D4F9	NA	COG0008	information storage and processing	J : Translation	Glutamyl- and glutaminyl-tRNA synthetases	TIGR00464	Protein synthesis	tRNA aminoacylation	glutamate--tRNA ligase	PF00749.17	Bacteria	Bacteroidetes	Bacteroidia	Bacteroidales	Bacteroidaceae	Bacteroides	Bacteroides graminisolvens	9.37e-05	8.45e-05	0.000144964	0	0	0	0	0	0.000286584	0.000336987	0.000273445	0.000271619	0.000223425	0.000124945	0.000279071	0.000259923
A0A069D4G2	NA	COG2259	poorly characterized	S : Function unknown	Predicted membrane protein	no hit	-	-	-	PF07681.8	Bacteria	Bacteroidetes	Bacteroidia	Bacteroidales	Bacteroidaceae	Bacteroides	Bacteroides graminisolvens	0	0	0	0	0	0	0	0	0	0	0	0	0.000313937	0	0	0
A0A069D4G3	NA	no hit	-	S : Function unknown	-	no hit	-	-	-	PF13505.2	Bacteria	Bacteroidetes	Bacteroidia	Bacteroidales	Bacteroidaceae	Bacteroides	Bacteroides graminisolvens	0.00123386	0.00124518	0.0010803	0.00118677	0.00115351	0.00149237	0.00156395	0.00152351	0.00112339	0.00165139	0.0017571	0.00140112	0.000792062	0.00105558	0.00154331	0.00136055
A0A069D4G9	NA	COG0060	information storage and processing	J : Translation	Isoleucyl-tRNA synthetase	no hit	-	-	-	PF08264.9	Bacteria	Bacteroidetes	Bacteroidia	Bacteroidales	Bacteroidaceae	Bacteroides	Bacteroides graminisolvens	0.000230782	0.000341825	0.000160289	0.00021694	0.000331141	0.000394185	0.000420152	0.00025531	0.000238915	0.000146153	0.00016152	0.000177418	0.000178796	0.000118964	0.000136144	0.000104029
A0A069D4H3	NA	COG1185	information storage and processing	J : Translation	Polyribonucleotide nucleotidyltransferase (polynucleotide phosphorylase)	TIGR03591	Transcription	Degradation of RNA	polyribonucleotide nucleotidyltransferase	PF01138.17	Bacteria	Bacteroidetes	Bacteroidia	Bacteroidales	Bacteroidaceae	Bacteroides	Bacteroides graminisolvens	0.000247979	0.000218785	0.000234251	9.39e-05	0.000280848	0.000327624	0.000217061	0.000193771	0.000453879	0.000453031	0.000554352	0.000533702	0.000392531	0.000286222	0.000424762	0.000235416
A0A069D4H7	NA	COG2166	poorly characterized	R : General function prediction only	SufE protein probably involved in Fe-S center assembly	no hit	-	-	-	PF02657.11	Bacteria	Bacteroidetes	Bacteroidia	Bacteroidales	Bacteroidaceae	Bacteroides	Bacteroides graminisolvens	0	0	0	0	0	0	0	0	0	0	0	0	0	0	0.000290776	0
A0A069D4H9	NA	COG0331	metabolism	I : Lipid	(acyl-carrier-protein) S-malonyltransferase	TIGR00128	Fatty acid and phospholipid metabolism	Biosynthesis	malonyl CoA-acyl carrier protein transacylase	PF00698.17	Bacteria	Bacteroidetes	Bacteroidia	Bacteroidales	Bacteroidaceae	Bacteroides	Bacteroides graminisolvens	0	0	0	0	0	0.000182904	0	0	0	0	0.000483998	0.000385441	0.000196035	0.000398867	0.000559285	0.000434116
A0A069D4I7	GH2	COG3250	metabolism	G : Carbohydrate	Beta-galactosidase/beta-glucuronidase	no hit	-	-	-	PF02837.14	Bacteria	Bacteroidetes	Bacteroidia	Bacteroidales	Bacteroidaceae	Bacteroides	Bacteroides graminisolvens	0	4.43e-05	0	0	0	5.66e-05	0	0	0	0	0	0	0	0	0	0
A0A069D4J2	NA	COG1470	poorly characterized	S : Function unknown	Predicted membrane protein	no hit	-	-	-	PF10633.5	Bacteria	Bacteroidetes	Bacteroidia	Bacteroidales	Bacteroidaceae	Bacteroides	Bacteroides graminisolvens	0.000431918	0.000586816	0.000480406	0.000417491	0.000174498	0.000324938	0.000367472	0.000434443	0.000624129	0.000534212	0.000442076	0.000408985	0.000359637	0.000575545	0.000460569	0.000546503
A0A069D4J3	NA	COG1680	cellular processes and signaling	V : Defense mechanisms	Beta-lactamase class C and other penicillin binding proteins	no hit	-	-	-	PF00144.20	Bacteria	Bacteroidetes	Bacteroidia	Bacteroidales	Bacteroidaceae	Bacteroides	Bacteroides graminisolvens	0.000125533	0.000106294	0	0	0	0	0	0	0	0.000265593	0.000311189	0.000156954	8.8e-05	0.000270937	0.000161544	0.000123874
A0A069D4J9	GT20	COG0380	metabolism	G : Carbohydrate	Trehalose-6-phosphate synthase	TIGR00685	Cellular processes	Adaptations to atypical conditions	trehalose-phosphatase	PF00982.17	Bacteria	Bacteroidetes	Bacteroidia	Bacteroidales	Bacteroidaceae	Bacteroides	Bacteroides graminisolvens	0.000189015	0.000223863	0.000134009	0.000337175	0	0.000170331	0	0.000120667	0.000150892	0.000184384	0.000220239	0.000250289	0.000268624	0.000104597	9.94e-05	0.000128228
A0A069D4L0	NA	COG1629	metabolism	P : Inorganic ion	Outer membrane receptor proteins, mostly Fe transport	TIGR04056	Transport and binding proteins	Unknown substrate	TonB-linked outer membrane protein, SusC/RagA family	PF13715.2	Bacteria	Bacteroidetes	Bacteroidia	Bacteroidales	Bacteroidaceae	Bacteroides	Bacteroides graminisolvens	0	0	0	0	0	0	0	0	5.01e-05	5.18e-05	4.12e-05	7.43e-05	0	0	3.91e-05	0
A0A069D4L3	NA	COG0235	metabolism	G : Carbohydrate	Ribulose-5-phosphate 4-epimerase and related epimerases and aldolases	no hit	-	-	-	PF00596.17	Bacteria	Bacteroidetes	Bacteroidia	Bacteroidales	Bacteroidaceae	Bacteroides	Bacteroides graminisolvens	0	0	0	0	0	0	0	0	0.000361812	0.000547716	0.000404566	0.000621537	0.00044893	0.000537674	0.000623231	0.000490541
A0A069D4L4	NA	COG0060	information storage and processing	J : Translation	Isoleucyl-tRNA synthetase	TIGR00392	Protein synthesis	tRNA aminoacylation	isoleucine--tRNA ligase	PF00133.18	Bacteria	Bacteroidetes	Bacteroidia	Bacteroidales	Bacteroidaceae	Bacteroides	Bacteroides graminisolvens	0.000168693	7.96e-05	0.000119507	0	0.000139872	7.61e-05	0	0.000112108	0.000190418	0.000158602	9.93e-05	0.000132703	7.88e-05	0.000115369	5.87e-05	0
A0A069D4L5	GH28	COG5434	cellular processes and signaling	M : Cell wall	Endopolygalacturonase	no hit	-	-	-	PF00295.13	Bacteria	Bacteroidetes	Bacteroidia	Bacteroidales	Bacteroidaceae	Bacteroides	Bacteroides graminisolvens	0	0	0	0	0	0	0	0	7.3e-05	7.49e-05	8.16e-05	0	6.51e-05	0	0	0
A0A069D4L8	NA	COG4105	poorly characterized	R : General function prediction only	DNA uptake lipoprotein	TIGR03302	Protein fate	Protein and peptide secretion and trafficking	outer membrane assembly lipoprotein YfiO	PF13525.2	Bacteria	Bacteroidetes	Bacteroidia	Bacteroidales	Bacteroidaceae	Bacteroides	Bacteroides graminisolvens	0.000182787	0.000162953	0.000192948	0.000256726	0.000379653	0.00020649	0.00024249	0	0.000308588	0.00021902	0.000168391	0.000264803	0.000519397	0.00015002	0.000208075	0.000189398
A0A069D4L9	NA	no hit	-	S : Function unknown	-	TIGR00879	Transport and binding proteins	Carbohydrates, organic alcohols, and acids	MFS transporter, sugar porter (SP) family	PF00083.20	Bacteria	Bacteroidetes	Bacteroidia	Bacteroidales	Bacteroidaceae	Bacteroides	Bacteroides graminisolvens	0	0	0	0	0	0	0	0	0	0	0	0	7.28e-05	0	0	0
A0A069D4M0	NA	no hit	-	S : Function unknown	-	no hit	-	-	-	PF13508.2	Bacteria	Bacteroidetes	Bacteroidia	Bacteroidales	Bacteroidaceae	Bacteroides	Bacteroides graminisolvens	0.000333492	0.000438742	0.00038642	0	0.000348995	0.000371606	0.000387653	0.000397627	0.000348884	0.000344033	0.000220403	0.000409295	0.000476546	0.000208849	0.000280684	0.00040089
A0A069D4M6	GH13_8	COG0296	metabolism	G : Carbohydrate	1,4-alpha-glucan branching enzyme	no hit	-	-	-	PF00128.20	Bacteria	Bacteroidetes	Bacteroidia	Bacteroidales	Bacteroidaceae	Bacteroides	Bacteroides graminisolvens	0.000310948	0.000392306	0.000415785	0.000474408	0.000220056	0.000497866	0.000389851	0.000437961	0.000524778	0.000574482	0.000734644	0.000641774	0.000596881	0.000324085	0.000389189	0.000345339
A0A069D4M8	NA	COG1629	metabolism	P : Inorganic ion	Outer membrane receptor proteins, mostly Fe transport	no hit	-	-	-	PF00593.20	Bacteria	Bacteroidetes	Bacteroidia	Bacteroidales	Bacteroidaceae	Bacteroides	Bacteroides graminisolvens	0.000969413	0.000816081	0.000830787	0.000913498	0.000897081	0.000963807	0.000764743	0.000608465	0.000609979	0.000870835	0.000978448	0.00114884	0.00048477	0.000692527	0.000461553	0.000438436
A0A069D4M9	GH115	no hit	-	S : Function unknown	-	no hit	-	-	-	PF15979.1	Bacteria	Bacteroidetes	Bacteroidia	Bacteroidales	Bacteroidaceae	Bacteroides	Bacteroides graminisolvens	0	7.3e-05	0	0	0	0	0	0	9.65e-05	9.93e-05	0	0.000118675	9.62e-05	0	0	0
A0A069D4N0	NA	COG0642	cellular processes and signaling	T : Signal transduction	Signal transduction histidine kinase	TIGR00229	Regulatory functions	Small molecule interactions	PAS domain S-box protein	PF08447.7	Bacteria	Bacteroidetes	Bacteroidia	Bacteroidales	Bacteroidaceae	Bacteroides	Bacteroides graminisolvens	5.75e-05	5.13e-05	0.000117998	0.000101988	0.000100448	0.000130015	0.000136355	0.000114595	0.000142131	0.000109325	8.67e-05	0.000110136	9.59e-05	8.01e-05	0	0
A0A069D4P5	GH32	COG1621	metabolism	G : Carbohydrate	Beta-fructosidases (levanase/invertase)	no hit	-	-	-	PF16346.1	Bacteria	Bacteroidetes	Bacteroidia	Bacteroidales	Bacteroidaceae	Bacteroides	Bacteroides graminisolvens	0	0	0	0	0.000125717	0.000133738	0	0.000109912	0	0	0	0	0	0	0	0
A0A069D4P7	NA	COG1022	metabolism	I : Lipid	Long-chain acyl-CoA synthetases (AMP-forming)	no hit	-	-	-	PF00501.24	Bacteria	Bacteroidetes	Bacteroidia	Bacteroidales	Bacteroidaceae	Bacteroides	Bacteroides graminisolvens	0	6.96e-05	0	0	0	8.9e-05	0	0	0.000184988	9.44e-05	0.000168897	0.000103419	0.000113072	5.98e-05	8.31e-05	8.16e-05
A0A069D4Q2	NA	COG0642	cellular processes and signaling	T : Signal transduction	Signal transduction histidine kinase	no hit	-	-	-	PF13407.2	Bacteria	Bacteroidetes	Bacteroidia	Bacteroidales	Bacteroidaceae	Bacteroides	Bacteroides graminisolvens	7.49e-05	0	0	0	0	0	0	0	0	0	0	0	0	0	0	0
A0A069D4Q4	NA	COG0275	cellular processes and signaling	M : Cell wall	Predicted S-adenosylmethionine-dependent methyltransferase involved in cell envelope biogenesis	TIGR00006	Protein synthesis	tRNA and rRNA base modification	16S rRNA (cytosine(1402)-N(4))-methyltransferase	PF01795.15	Bacteria	Bacteroidetes	Bacteroidia	Bacteroidales	Bacteroidaceae	Bacteroides	Bacteroides graminisolvens	0.00015573	0.000138831	0.000164386	0.000218724	0.000323454	0.000264347	0	0.000269225	0	0.000217284	0.000372445	0.000225605	0.000112035	0.000127813	0	0.000161362
A0A069D4Q6	NA	COG0005	metabolism	F : Nucleotide	Purine nucleoside phosphorylase	TIGR01700	Purines, pyrimidines, nucleosides, and nucleotides	Salvage of nucleosides and nucleotides	purine nucleoside phosphorylase I, inosine and guanosine-specific	PF01048.16	Bacteria	Bacteroidetes	Bacteroidia	Bacteroidales	Bacteroidaceae	Bacteroides	Bacteroides graminisolvens	0.000282939	0.000524575	0.000307255	0.000248105	0.000433478	0.000798799	0.00091634	0.000858637	0.00092249	0.00122431	0.00137352	0.00159386	0.000836398	0.000670398	0.000611458	0.000855856
A0A069D4Q8	NA	no hit	-	S : Function unknown	-	no hit	-	-	-	no hit	Bacteria	Bacteroidetes	Bacteroidia	Bacteroidales	Bacteroidaceae	Bacteroides	Bacteroides graminisolvens	0	0	0.000124501	0	0	0	0	0	0	0	0	0.000115605	0	0	0	0
A0A069D4Q9	NA	COG0771	cellular processes and signaling	M : Cell wall	UDP-N-acetylmuramoylalanine-D-glutamate ligase	TIGR01087	Cell envelope	Biosynthesis and degradation of murein sacculus and peptidoglycan	UDP-N-acetylmuramoylalanine--D-glutamate ligase	PF08245.8	Bacteria	Bacteroidetes	Bacteroidia	Bacteroidales	Bacteroidaceae	Bacteroides	Bacteroides graminisolvens	0	0	0	0	0	0	0	0	0.000213588	0.000167792	0	0.000105428	0.000202327	8.11e-05	0	0
A0A069D4S0	NA	COG1904	metabolism	G : Carbohydrate	Glucuronate isomerase	no hit	-	-	-	PF02614.10	Bacteria	Bacteroidetes	Bacteroidia	Bacteroidales	Bacteroidaceae	Bacteroides	Bacteroides graminisolvens	0.000540935	0.000576116	0.000725687	0.000765962	0.000678907	0.000653291	0.000499522	0.000537596	0.000656176	0.00102278	0.00109093	0.00125188	0.000676261	0.000863525	0.000821646	0.0009026
A0A069D4S3	NA	no hit	-	S : Function unknown	-	no hit	-	-	-	no hit	Bacteria	Bacteroidetes	Bacteroidia	Bacteroidales	Bacteroidaceae	Bacteroides	Bacteroides graminisolvens	0.000604755	0.00051713	0.000610905	0.000795106	0.000860782	0.000617417	0.000607311	0.000587069	0.000482915	0.00054557	0.000636618	0.000616212	0.000345485	0.000464991	0.000539461	0.000525997
A0A069D4S9	NA	COG2211	metabolism	G : Carbohydrate	Na+/melibiose symporter and related transporters	no hit	-	-	-	PF07690.12	Bacteria	Bacteroidetes	Bacteroidia	Bacteroidales	Bacteroidaceae	Bacteroides	Bacteroides graminisolvens	0	0	0	0	0	0	0	0	0	0	0	0	7.94e-05	0	0	0
A0A069D4T6	NA	COG0719	cellular processes and signaling	O : Posttranslational modification	ABC-type transport system involved in Fe-S cluster assembly, permease component	TIGR01981	Biosynthesis of cofactors, prosthetic groups, and carriers	Other	FeS assembly protein SufD	PF01458.13	Bacteria	Bacteroidetes	Bacteroidia	Bacteroidales	Bacteroidaceae	Bacteroides	Bacteroides graminisolvens	0.000318053	0.000363271	0.00034923	0.000264836	0	0.000230565	0.000363563	0.00038644	0.000431477	0.000643464	0.000721598	0.000565802	0.000495625	0.000556819	0.00059792	0.000535254
A0A069D4T8	NA	COG0195	information storage and processing	K : Transcription	Transcription elongation factor	TIGR01953	Transcription	Transcription factors	transcription termination factor NusA	PF08529.7	Bacteria	Bacteroidetes	Bacteroidia	Bacteroidales	Bacteroidaceae	Bacteroides	Bacteroides graminisolvens	0.000118345	9.99e-05	0	0	0	0.000191152	0	0	0.000217438	0.000244794	0.000335327	0.000378655	8.13e-05	0.000120951	0.00017272	0.000159333
A0A069D4U1	NA	COG0372	metabolism	C : Energy production and conversion	Citrate synthase	no hit	-	-	-	PF00285.17	Bacteria	Bacteroidetes	Bacteroidia	Bacteroidales	Bacteroidaceae	Bacteroides	Bacteroides graminisolvens	0.00239267	0.00214085	0.00261217	0.00290772	0.00199444	0.00199377	0.00175552	0.00197182	0.00183925	0.00251027	0.00256441	0.00300452	0.0016402	0.00204727	0.00197149	0.00205778
A0A069D4U3	NA	no hit	-	S : Function unknown	-	no hit	-	-	-	PF10988.4	Bacteria	Bacteroidetes	Bacteroidia	Bacteroidales	Bacteroidaceae	Bacteroides	Bacteroides graminisolvens	0	0.000344528	0.000295717	0	0	0	0	0	0.000227769	0.000436345	0.000470725	0.000394377	0.00014314	0.000488398	0.000337063	0.000391217
A0A069D4U7	NA	COG0548	metabolism	E : Amino acid	Acetylglutamate kinase	TIGR00761	Amino acid biosynthesis	Glutamate family	acetylglutamate kinase	PF00696.24	Bacteria	Bacteroidetes	Bacteroidia	Bacteroidales	Bacteroidaceae	Bacteroides	Bacteroides graminisolvens	0.000736239	0.000673265	0.000463697	0.000455873	0.000266961	0	0	0.0002334	0.00044465	0.000303034	0.000438202	0.000560711	0.000449622	0.000357902	0.000199003	0.000256975
A0A069D4V2	NA	COG0028	metabolism	E : Amino acid	Thiamine pyrophosphate-requiring enzymes [acetolactate synthase, pyruvate dehydrogenase (cytochrome), glyoxylate carboligase, phosphonopyruvate decarboxylase]	TIGR00118	Amino acid biosynthesis	Pyruvate family	acetolactate synthase, large subunit, biosynthetic type	PF02776.14	Bacteria	Bacteroidetes	Bacteroidia	Bacteroidales	Bacteroidaceae	Bacteroides	Bacteroides graminisolvens	0.000778388	0.000585127	0.000885238	0.000594246	0.000371111	0.000524371	0.000279998	0.000199654	0.000543435	0.000453392	0.000518091	0.000591531	0.000478125	0.000243096	0.000345672	0.000389013
A0A069D4V4	NA	COG0724	poorly characterized	R : General function prediction only	RNA-binding proteins (RRM domain)	no hit	-	-	-	PF00076.18	Bacteria	Bacteroidetes	Bacteroidia	Bacteroidales	Bacteroidaceae	Bacteroides	Bacteroides graminisolvens	0.000892533	0.00122209	0.00131253	0.000608199	0.00179714	0.00168085	0.000816157	0	0.0010773	0.00136035	0.0016292	0.00112554	0.00107811	0.00103839	0.00132232	0.000835945
A0A069D4V6	GH146	COG3533	poorly characterized	S : Function unknown	Uncharacterized protein conserved in bacteria	no hit	-	-	-	PF07944.8	Bacteria	Bacteroidetes	Bacteroidia	Bacteroidales	Bacteroidaceae	Bacteroides	Bacteroides graminisolvens	0	0	0	0	0	0	0	0	0.000125495	6.36e-05	0.000100897	0	7.22e-05	0	0	0
A0A069D4V8	NA	COG0178	information storage and processing	L : Replication	Excinuclease ATPase subunit	TIGR00630	DNA metabolism	DNA replication, recombination, and repair	excinuclease ABC subunit A	PF00005.23	Bacteria	Bacteroidetes	Bacteroidia	Bacteroidales	Bacteroidaceae	Bacteroides	Bacteroides graminisolvens	0	7.13e-05	0.00012732	9.16e-05	0	6.81e-05	8e-05	0	8.88e-05	8.8e-05	5.39e-05	6.04e-05	5.72e-05	4.95e-05	6.36e-05	6.25e-05
A0A069D4V9	NA	COG2071	poorly characterized	R : General function prediction only	Predicted glutamine amidotransferases	no hit	-	-	-	PF07722.9	Bacteria	Bacteroidetes	Bacteroidia	Bacteroidales	Bacteroidaceae	Bacteroides	Bacteroides graminisolvens	0	0	0	0	0	0	0	0.000196928	0	0.000253692	0.000205869	0.000158791	0	0.000214329	0.000310516	0.000441828
A0A069D4W3	NA	COG1249	metabolism	C : Energy production and conversion	Pyruvate/2-oxoglutarate dehydrogenase complex, dihydrolipoamide dehydrogenase (E3) component, and related enzymes	TIGR01350	-	-	dihydrolipoyl dehydrogenase	PF07992.10	Bacteria	Bacteroidetes	Bacteroidia	Bacteroidales	Bacteroidaceae	Bacteroides	Bacteroides graminisolvens	0.00041733	0.000445216	0.00043978	0.000307743	0.000378311	0.000157316	0.000277461	0.000206643	0.000160497	0.000323444	0.000428161	0.000412539	6.19e-05	0.000173819	0.000181371	0.000259545
A0A069D4W6	NA	COG1629	metabolism	P : Inorganic ion	Outer membrane receptor proteins, mostly Fe transport	TIGR04056	Transport and binding proteins	Unknown substrate	TonB-linked outer membrane protein, SusC/RagA family	PF13715.2	Bacteria	Bacteroidetes	Bacteroidia	Bacteroidales	Bacteroidaceae	Bacteroides	Bacteroides graminisolvens	4.95e-05	0	0	0	7e-05	0	0	0	0	0	0	0	0	0	0	0
A0A069D4W7	NA	COG0205	metabolism	G : Carbohydrate	6-phosphofructokinase	no hit	-	-	-	PF00365.16	Bacteria	Bacteroidetes	Bacteroidia	Bacteroidales	Bacteroidaceae	Bacteroides	Bacteroides graminisolvens	0	0	0	0	0.00034575	0	0	0	0.000332802	0.00043072	0.000251889	0.000228747	0.000287434	0	0.000122887	0.000139944
A0A069D4W8	NA	COG1884	metabolism	I : Lipid	Methylmalonyl-CoA mutase, N-terminal domain/subunit	TIGR00641	-	-	methylmalonyl-CoA mutase N-terminal domain	PF01642.18	Bacteria	Bacteroidetes	Bacteroidia	Bacteroidales	Bacteroidaceae	Bacteroides	Bacteroides graminisolvens	0.000431091	0.000393963	0.000371548	0.000352653	0.00020963	0.000399495	0.000500544	0.000537654	0.000489518	0.000357264	0.000374837	0.000439917	0.000318951	0.000234232	0.000259467	0.000246848
A0A069D4X7	NA	COG0681	cellular processes and signaling	U : Intracellular trafficking	Signal peptidase I	TIGR02227	Protein fate	Protein and peptide secretion and trafficking	signal peptidase I	PF00717.19	Bacteria	Bacteroidetes	Bacteroidia	Bacteroidales	Bacteroidaceae	Bacteroides	Bacteroides graminisolvens	0	0.000129254	0.000173687	0	0	0	0	0	0.000204439	0.00013159	0.000167451	0.000142555	0.00013174	8.24e-05	0.000187641	0.000147937
A0A069D4X9	NA	COG0642	cellular processes and signaling	T : Signal transduction	Signal transduction histidine kinase	no hit	-	-	-	PF07494.7	Bacteria	Bacteroidetes	Bacteroidia	Bacteroidales	Bacteroidaceae	Bacteroides	Bacteroides graminisolvens	0	0	7.08e-05	7.85e-05	0	4.93e-05	0	0	0	0	0	0	0	0	0	0
A0A069D4Z9	GH31	COG1501	metabolism	G : Carbohydrate	Alpha-glucosidases, family 31 of glycosyl hydrolases	no hit	-	-	-	PF01055.22	Bacteria	Bacteroidetes	Bacteroidia	Bacteroidales	Bacteroidaceae	Bacteroides	Bacteroides graminisolvens	0.000116462	0.000207859	6.15e-05	0	8.24e-05	0.000109803	0	0.000142121	0.000175705	0.000249669	0.000256277	0.000285882	5.5e-05	0.000136897	0.000125517	0.000255347
A0A069D500	NA	COG1629	metabolism	P : Inorganic ion	Outer membrane receptor proteins, mostly Fe transport	TIGR04056	Transport and binding proteins	Unknown substrate	TonB-linked outer membrane protein, SusC/RagA family	PF07715.11	Bacteria	Bacteroidetes	Bacteroidia	Bacteroidales	Bacteroidaceae	Bacteroides	Bacteroides graminisolvens	0.00148124	0.0011401	0.00137011	0.00174974	0.00206639	0.00137565	0.00114585	0.00108909	0.00117582	0.00173354	0.00156822	0.00207867	0.00091159	0.00130563	0.00125515	0.00158576
A0A069D504	NA	COG0102	information storage and processing	J : Translation	Ribosomal protein L13	TIGR01066	Protein synthesis	Ribosomal proteins: synthesis and modification	ribosomal protein uL13	PF00572.14	Bacteria	Bacteroidetes	Bacteroidia	Bacteroidales	Bacteroidaceae	Bacteroides	Bacteroides graminisolvens	0.00130063	0.00138294	0.00195974	0.00131109	0.00173757	0.00104904	0.00124123	0.00100951	0.000971677	0.00148547	0.00138929	0.00145448	0.00065562	0.000999567	0.000652935	0.00064123
A0A069D505	NA	COG5016	metabolism	C : Energy production and conversion	Pyruvate/oxaloacetate carboxyltransferase	no hit	-	-	-	PF02436.14	Bacteria	Bacteroidetes	Bacteroidia	Bacteroidales	Bacteroidaceae	Bacteroides	Bacteroides graminisolvens	0.000380417	0.000529303	0.00054377	0.000418289	0.000219696	0.000262772	0.000461802	0.000135833	0.00050253	0.000612022	0.000666973	0.000694008	0.00034996	0.000533529	0.000373512	0.00042666
A0A069D511	NA	COG0074	metabolism	C : Energy production and conversion	Succinyl-CoA synthetase, alpha subunit	no hit	-	-	-	no hit	Bacteria	Bacteroidetes	Bacteroidia	Bacteroidales	Bacteroidaceae	Bacteroides	Bacteroides graminisolvens	0.00178773	0.00207844	0.00243028	0.00196608	0.0024537	0.00146276	0.00154943	0.00189417	0.00228263	0.0025719	0.00252333	0.002842	0.00108863	0.00162073	0.00195123	0.0024125
A0A069D512	NA	COG0524	metabolism	G : Carbohydrate	Sugar kinases, ribokinase family	no hit	-	-	-	PF00294.20	Bacteria	Bacteroidetes	Bacteroidia	Bacteroidales	Bacteroidaceae	Bacteroides	Bacteroides graminisolvens	0	0	0	0	0.000344452	0.000223295	0.000381207	0.000477978	0.000333018	0.000255314	0.000176323	0.000194603	0.000291597	0.000168967	0	0.000210046
A0A069D522	NA	COG2207	information storage and processing	K : Transcription	AraC-type DNA-binding domain-containing proteins	no hit	-	-	-	PF12833.3	Bacteria	Bacteroidetes	Bacteroidia	Bacteroidales	Bacteroidaceae	Bacteroides	Bacteroides graminisolvens	0.00012366	0.000385748	0.000332037	0.000330806	0	0.000177484	0	0.00020615	0.000355375	0.00061191	0.000599876	0.000590153	0.000196397	0.00043849	0.000442519	0.000483609
A0A069D524	NA	no hit	-	S : Function unknown	-	no hit	-	-	-	PF07396.7	Bacteria	Bacteroidetes	Bacteroidia	Bacteroidales	Bacteroidaceae	Bacteroides	Bacteroides graminisolvens	0	0.00025109	0	0	0	0.000314712	0	0	0.000425661	0	0.000387659	0	0.000200345	0	0.000242883	0.000288553
A0A069D526	NA	COG0447	metabolism	H : Coenzyme	Dihydroxynaphthoic acid synthase	TIGR01929	Biosynthesis of cofactors, prosthetic groups, and carriers	Menaquinone and ubiquinone	naphthoate synthase	PF00378.16	Bacteria	Bacteroidetes	Bacteroidia	Bacteroidales	Bacteroidaceae	Bacteroides	Bacteroides graminisolvens	0.000421984	0.000510315	0.000473278	0	0.000813855	0.000505167	0.000424732	0.000477133	0.000520627	0.000480331	0.000269769	0.000450719	0.000312087	0.000266762	0	0
A0A069D532	GH13	COG0296	metabolism	G : Carbohydrate	1,4-alpha-glucan branching enzyme	no hit	-	-	-	PF00128.20	Bacteria	Bacteroidetes	Bacteroidia	Bacteroidales	Bacteroidaceae	Bacteroides	Bacteroides graminisolvens	0.000123286	0.000127809	0.000130139	0.000133453	0.000171658	0.000162607	0	0	7.26e-05	9e-05	5.51e-05	0.000102168	4.43e-05	7e-05	8.02e-05	6.39e-05
A0A069D534	NA	COG0495	information storage and processing	J : Translation	Leucyl-tRNA synthetase	TIGR00396	Protein synthesis	tRNA aminoacylation	leucine--tRNA ligase	PF13603.2	Bacteria	Bacteroidetes	Bacteroidia	Bacteroidales	Bacteroidaceae	Bacteroides	Bacteroides graminisolvens	0	4.46e-05	5.33e-05	5.73e-05	0.000213172	5.66e-05	0	5.82e-05	9.65e-05	0.000108325	8.98e-05	5.03e-05	8.17e-05	4.12e-05	4.38e-05	0
A0A069D536	NA	COG0674	metabolism	C : Energy production and conversion	Pyruvate:ferredoxin oxidoreductase and related 2-oxoacid:ferredoxin oxidoreductases, alpha subunit	no hit	-	-	-	PF01855.15	Bacteria	Bacteroidetes	Bacteroidia	Bacteroidales	Bacteroidaceae	Bacteroides	Bacteroides graminisolvens	0.00244571	0.00191748	0.00245843	0.00277948	0.00145137	0.00144729	0.00165638	0.00180179	0.00215307	0.00250332	0.00241615	0.00248724	0.00289116	0.00181939	0.00209805	0.00236647
A0A069D540	NA	COG1883	metabolism	C : Energy production and conversion	Na+-transporting methylmalonyl-CoA/oxaloacetate decarboxylase, beta subunit	TIGR01109	Transport and binding proteins	Cations and iron carrying compounds	sodium ion-translocating decarboxylase, beta subunit	PF03977.9	Bacteria	Bacteroidetes	Bacteroidia	Bacteroidales	Bacteroidaceae	Bacteroides	Bacteroides graminisolvens	0.000122648	0.000144955	0.000129465	0.000139895	0.000347187	0.000138604	0.000192822	0	0.000197679	0.000136221	0.000162553	0.000120997	0.000176888	0.000149818	0.000129403	0
A0A069D543	NA	COG3630	metabolism	C : Energy production and conversion	Na+-transporting methylmalonyl-CoA/oxaloacetate decarboxylase, gamma subunit	no hit	-	-	-	PF04277.9	Bacteria	Bacteroidetes	Bacteroidia	Bacteroidales	Bacteroidaceae	Bacteroides	Bacteroides graminisolvens	0	0	0	0	0	0	0	0	0	0.000427194	0.000465019	0	0	0.000412813	0.0004746	0.00056384
A0A069D545	NA	COG0254	information storage and processing	J : Translation	Ribosomal protein L31	TIGR00105	Protein synthesis	Ribosomal proteins: synthesis and modification	ribosomal protein bL31	PF01197.14	Bacteria	Bacteroidetes	Bacteroidia	Bacteroidales	Bacteroidaceae	Bacteroides	Bacteroides graminisolvens	0.000733649	0.000502436	0.000784559	0	0.00117059	0.000636919	0.000886066	0.000697419	0	0	0	0	0.000384169	0.000482763	0	0
A0A069D546	NA	COG1629	metabolism	P : Inorganic ion	Outer membrane receptor proteins, mostly Fe transport	TIGR04056	Transport and binding proteins	Unknown substrate	TonB-linked outer membrane protein, SusC/RagA family	PF13715.2	Bacteria	Bacteroidetes	Bacteroidia	Bacteroidales	Bacteroidaceae	Bacteroides	Bacteroides graminisolvens	0.000200602	0.00025527	0.000131709	0.000205506	0.000132912	0.000341513	0.000367669	0.000227028	0.000175951	0.000159465	0.00031196	0.000382767	0.000157296	0.00013002	9.17e-05	0.000116746
A0A069D550	GH5_4	COG2730	metabolism	G : Carbohydrate	Endoglucanase	no hit	-	-	-	PF00150.14	Bacteria	Bacteroidetes	Bacteroidia	Bacteroidales	Bacteroidaceae	Bacteroides	Bacteroides graminisolvens	0	0	0	0	0	0.000146356	0.000187864	0	0	0	0	9.55e-05	0	0	0	0
A0A069D551	NA	COG3022	poorly characterized	S : Function unknown	Uncharacterized protein conserved in bacteria	no hit	-	-	-	PF03883.10	Bacteria	Bacteroidetes	Bacteroidia	Bacteroidales	Bacteroidaceae	Bacteroides	Bacteroides graminisolvens	0.000193695	0.000164862	0	0	0	0	0.000245332	0.000214475	0	0	0	0	0	0	0	0
A0A069D563	NA	COG0514	information storage and processing	L : Replication	Superfamily II DNA helicase	TIGR01389	DNA metabolism	DNA replication, recombination, and repair	ATP-dependent DNA helicase RecQ	PF09382.6	Bacteria	Bacteroidetes	Bacteroidia	Bacteroidales	Bacteroidaceae	Bacteroides	Bacteroides graminisolvens	0.000274101	0.000194116	0.000252689	0.000256781	0.000295458	0.000319502	0.000337133	0.000154632	0.000330265	0.000511187	0.000484548	0.000430268	0.000308753	0.000333142	0.000284368	0.000175815
A0A069D568	NA	COG0544	cellular processes and signaling	O : Posttranslational modification	FKBP-type peptidyl-prolyl cis-trans isomerase (trigger factor)	no hit	-	-	-	PF05697.9	Bacteria	Bacteroidetes	Bacteroidia	Bacteroidales	Bacteroidaceae	Bacteroides	Bacteroides graminisolvens	0.000991721	0.000844093	0	0	0	0.00106864	0	0.00119222	0.000892427	0.000795211	0.000846349	0.000948966	0.000681173	0.00080198	0.000998991	0
A0A069D569	NA	COG1187	information storage and processing	J : Translation	16S rRNA uridine-516 pseudouridylate synthase and related pseudouridylate synthases	TIGR00093	Protein synthesis	tRNA and rRNA base modification	pseudouridine synthase	PF00849.18	Bacteria	Bacteroidetes	Bacteroidia	Bacteroidales	Bacteroidaceae	Bacteroides	Bacteroides graminisolvens	0.000545327	0.000521045	0.000616956	0.000827609	0.000579237	0.000513784	0.000663472	0.00052617	0.000764965	0.000710953	0.000686601	0.000871816	0.000490237	0.000411967	0.000646577	0.000641104
A0A069D574	NA	COG0845	cellular processes and signaling	M : Cell wall	Membrane-fusion protein	TIGR01730	Transport and binding proteins	Unknown substrate	efflux transporter, RND family, MFP subunit	PF13437.2	Bacteria	Bacteroidetes	Bacteroidia	Bacteroidales	Bacteroidaceae	Bacteroides	Bacteroides graminisolvens	0	0	0.00013729	0	0.000184085	0	0	0	0.000137798	0.000253117	0.000270231	0.000130352	0	0.000148632	0.000169086	0.0001772
A0A069D575	NA	COG0264	information storage and processing	J : Translation	Translation elongation factor Ts	TIGR00116	Protein synthesis	Translation factors	translation elongation factor Ts	PF00889.15	Bacteria	Bacteroidetes	Bacteroidia	Bacteroidales	Bacteroidaceae	Bacteroides	Bacteroides graminisolvens	0.0018839	0.00231048	0.00254915	0.00263032	0.00241368	0.00227744	0.00219612	0.00228708	0.00241557	0.00278516	0.0027664	0.00269727	0.00218653	0.0023552	0.00207153	0.00178536
A0A069D579	NA	COG0245	metabolism	I : Lipid	2C-methyl-D-erythritol 2,4-cyclodiphosphate synthase	TIGR00151	Biosynthesis of cofactors, prosthetic groups, and carriers	Other	2-C-methyl-D-erythritol 2,4-cyclodiphosphate synthase	PF02542.12	Bacteria	Bacteroidetes	Bacteroidia	Bacteroidales	Bacteroidaceae	Bacteroides	Bacteroides graminisolvens	0	0	0	0	0	0.000338487	0	0.000347504	0	0.000404241	0.000542815	0.000465709	0	0.000245919	0	0
A0A069D580	NA	COG1127	metabolism	Q : Secondary metabolites	ABC-type transport system involved in resistance to organic solvents, ATPase component	no hit	-	-	-	PF00005.23	Bacteria	Bacteroidetes	Bacteroidia	Bacteroidales	Bacteroidaceae	Bacteroides	Bacteroides graminisolvens	0.000184929	0	0	0	0	0	0	0	0.000185641	0	0	0	0	0	0	0
A0A069D588	NA	COG0318	metabolism	I : Lipid	Acyl-CoA synthetases (AMP-forming)/AMP-acid ligases II	no hit	-	-	-	PF00501.24	Bacteria	Bacteroidetes	Bacteroidia	Bacteroidales	Bacteroidaceae	Bacteroides	Bacteroides graminisolvens	0	0	0	0	0	0	0	0	0	0.000101846	0.00011084	0.000127958	0	9.84e-05	0	0.000128826
A0A069D589	NA	COG0845	cellular processes and signaling	M : Cell wall	Membrane-fusion protein	TIGR01730	Transport and binding proteins	Unknown substrate	efflux transporter, RND family, MFP subunit	PF16576.1	Bacteria	Bacteroidetes	Bacteroidia	Bacteroidales	Bacteroidaceae	Bacteroides	Bacteroides graminisolvens	0.000602275	0.000457115	0.000542759	0.000516244	0.000343704	0.000369594	0.000208134	0.000253024	0.000302311	0.000307313	0.000334979	0.000372526	0.000201066	0.000160055	0.000159442	0.000190831
A0A069D593	NA	COG0202	information storage and processing	K : Transcription	DNA-directed RNA polymerase, alpha subunit/40 kD subunit	TIGR02027	Transcription	DNA-dependent RNA polymerase	DNA-directed RNA polymerase, alpha subunit	PF01193.20	Bacteria	Bacteroidetes	Bacteroidia	Bacteroidales	Bacteroidaceae	Bacteroides	Bacteroides graminisolvens	0.000889943	0.00110527	0.00126637	0.00120616	0.000704074	0.000917701	0.000957359	0.000872166	0.00125115	0.00132219	0.00128087	0.00111129	0.00119954	0.0013038	0.00101861	0.000843707
A0A069D597	NA	COG2195	metabolism	E : Amino acid	Di- and tripeptidases	TIGR01893	-	-	Xaa-His dipeptidase	PF01546.24	Bacteria	Bacteroidetes	Bacteroidia	Bacteroidales	Bacteroidaceae	Bacteroides	Bacteroides graminisolvens	0.000126804	0.000174042	0.00024053	0.000244465	0.0001701	0.000366758	0.000241047	0.000200495	0.000482075	0.000524869	0.000495191	0.000488151	0.00043893	0.00035622	0.00036497	0.000436455
A0A069D5A0	NA	COG0017	information storage and processing	J : Translation	Aspartyl/asparaginyl-tRNA synthetases	TIGR00457	Protein synthesis	tRNA aminoacylation	asparagine--tRNA ligase	PF00152.16	Bacteria	Bacteroidetes	Bacteroidia	Bacteroidales	Bacteroidaceae	Bacteroides	Bacteroides graminisolvens	0.000233159	0	0.00014112	0.000171645	0.000143484	0.000305544	0.00043533	0.000260967	0.000440679	0.00014146	0.000237942	0.00027674	0.000487648	0.000115135	0.000154979	0
A0A069D5A1	NA	COG1629	metabolism	P : Inorganic ion	Outer membrane receptor proteins, mostly Fe transport	TIGR04056	Transport and binding proteins	Unknown substrate	TonB-linked outer membrane protein, SusC/RagA family	PF13715.2	Bacteria	Bacteroidetes	Bacteroidia	Bacteroidales	Bacteroidaceae	Bacteroides	Bacteroides graminisolvens	0.00074819	0.000306514	0.000136329	0.000112264	0.00041339	0.000389081	0.000163534	6e-05	0.000289481	5.69e-05	0.000113825	0.000112272	0.000351939	5.27e-05	6.4e-05	0
A0A069D5A6	NA	COG0642	cellular processes and signaling	T : Signal transduction	Signal transduction histidine kinase	no hit	-	-	-	PF07494.7	Bacteria	Bacteroidetes	Bacteroidia	Bacteroidales	Bacteroidaceae	Bacteroides	Bacteroides graminisolvens	3.45e-05	4.08e-05	6.1e-05	5.85e-05	0	0	0	0	0	0	0	0	0	0	0	0
A0A069D5A7	NA	COG0488	poorly characterized	R : General function prediction only	ATPase components of ABC transporters with duplicated ATPase domains	no hit	-	-	-	PF00005.23	Bacteria	Bacteroidetes	Bacteroidia	Bacteroidales	Bacteroidaceae	Bacteroides	Bacteroides graminisolvens	9.22e-05	0.000116371	0.000152783	0.000123347	0.000124318	0	0	0	8.82e-05	0.000100769	0.00013155	0.000145592	0.000126377	6.66e-05	9.27e-05	9.1e-05
A0A069D5B4	NA	no hit	-	S : Function unknown	-	no hit	-	-	-	PF07980.7	Bacteria	Bacteroidetes	Bacteroidia	Bacteroidales	Bacteroidaceae	Bacteroides	Bacteroides graminisolvens	0.000677653	0.000553765	0.000631635	0.000818087	0.000629467	0.000572675	0.000623836	0.000639492	0.000719424	0.000797507	0.000965806	0.000897959	0.00051325	0.000663421	0.00067938	0.000712836
A0A069D5B5	NA	COG0097	information storage and processing	J : Translation	Ribosomal protein L6P/L9E	TIGR03654	Protein synthesis	Ribosomal proteins: synthesis and modification	ribosomal protein uL6	PF00347.19	Bacteria	Bacteroidetes	Bacteroidia	Bacteroidales	Bacteroidaceae	Bacteroides	Bacteroides graminisolvens	0.0010815	0.00114901	0.000814784	0.000948318	0.000983689	0.00106607	0.000877331	0.000839433	0.000928932	0.00146661	0.00145188	0.00112014	0.000982699	0.00120114	0.000887792	0.000886212
A0A069D5D1	NA	COG0091	information storage and processing	J : Translation	Ribosomal protein L22	TIGR01044	Protein synthesis	Ribosomal proteins: synthesis and modification	ribosomal protein uL22	PF00237.15	Bacteria	Bacteroidetes	Bacteroidia	Bacteroidales	Bacteroidaceae	Bacteroides	Bacteroides graminisolvens	0.000953292	0.000949104	0.00111881	0.00113093	0.000866954	0.000932508	0.000792086	0.000430597	0	0.000677848	0.000418259	0.00054912	0.000259974	0.000468646	0	0
A0A069D5D3	NA	COG2812	information storage and processing	L : Replication	DNA polymerase III, gamma/tau subunits	TIGR02397	DNA metabolism	DNA replication, recombination, and repair	DNA polymerase III, subunit gamma and tau	PF13177.2	Bacteria	Bacteroidetes	Bacteroidia	Bacteroidales	Bacteroidaceae	Bacteroides	Bacteroides graminisolvens	0	0	0	0	0	0	0.000172305	0	0	0	0	0	0	0	0	0
A0A069D5D4	NA	COG0234	cellular processes and signaling	O : Posttranslational modification	Co-chaperonin GroES (HSP10)	no hit	-	-	-	PF00166.17	Bacteria	Bacteroidetes	Bacteroidia	Bacteroidales	Bacteroidaceae	Bacteroides	Bacteroides graminisolvens	0	0	0	0	0	0	0	0	0	0	0	0	0	0.000728755	0.00045878	0
A0A069D5D5	NA	COG0087	information storage and processing	J : Translation	Ribosomal protein L3	TIGR03625	-	-	50S ribosomal protein uL3	PF00297.18	Bacteria	Bacteroidetes	Bacteroidia	Bacteroidales	Bacteroidaceae	Bacteroides	Bacteroides graminisolvens	0.00089829	0.00100789	0.00102772	0.000889076	0.00110001	0.000915164	0.000721533	0.000499696	0.0011627	0.00126147	0.000857258	0.000898498	0.00121384	0.00102675	0.000584211	0.000754678
A0A069D5D7	NA	COG0104	metabolism	F : Nucleotide	Adenylosuccinate synthase	TIGR00184	Purines, pyrimidines, nucleosides, and nucleotides	Purine ribonucleotide biosynthesis	adenylosuccinate synthase	PF00709.17	Bacteria	Bacteroidetes	Bacteroidia	Bacteroidales	Bacteroidaceae	Bacteroides	Bacteroides graminisolvens	0.000828966	0.000700165	0.000832474	0.000997396	0.000470072	0.000716707	0.000646923	0.00069431	0.000575903	0.000775685	0.000570095	0.000819961	0.000529549	0.000627526	0.000397022	0.000311384
A0A069D5D8	NA	COG1158	information storage and processing	K : Transcription	Transcription termination factor	TIGR00767	Transcription	Transcription factors	transcription termination factor Rho	PF07497.8	Bacteria	Bacteroidetes	Bacteroidia	Bacteroidales	Bacteroidaceae	Bacteroides	Bacteroides graminisolvens	0.000134412	0.000121971	7.28e-05	0	9.77e-05	0	0	0	0.000333066	0.000243284	0.000227446	0.000205158	9.68e-05	0.000148624	0.000125172	0.000143015
A0A069D5E3	NA	COG1595	information storage and processing	K : Transcription	DNA-directed RNA polymerase specialized sigma subunit, sigma24 homolog	TIGR02937	-	-	RNA polymerase sigma factor, sigma-70 family	PF04542.10	Bacteria	Bacteroidetes	Bacteroidia	Bacteroidales	Bacteroidaceae	Bacteroides	Bacteroides graminisolvens	0	0	0	0	0	0	0	0	0	0.00042023	0.000233798	0.000379905	0	0.000479236	0.00045196	0.000515808
A0A069D5E4	NA	COG0065	metabolism	E : Amino acid	3-isopropylmalate dehydratase large subunit	TIGR00170	Amino acid biosynthesis	Pyruvate family	3-isopropylmalate dehydratase, large subunit	PF00330.16	Bacteria	Bacteroidetes	Bacteroidia	Bacteroidales	Bacteroidaceae	Bacteroides	Bacteroides graminisolvens	0.000541804	0.000817888	0.00094249	0.000700246	0.000284124	0.000768524	0.000510796	0.000334355	0.00203774	0.00139468	0.00130641	0.00136478	0.001804	0.00100292	0.00098263	0.000848672
A0A069D5E8	NA	COG1155	metabolism	C : Energy production and conversion	Archaeal/vacuolar-type H+-ATPase subunit A	no hit	-	-	-	PF00306.23	Bacteria	Bacteroidetes	Bacteroidia	Bacteroidales	Bacteroidaceae	Bacteroides	Bacteroides graminisolvens	0	0.00032938	0	0	0.000506856	0.000643177	0.000647474	0.000283019	0.000272961	0.000338286	0.000330964	0.000405076	0.000230607	0.000278859	0	0.000375772
A0A069D5F1	GT3	COG0438	cellular processes and signaling	M : Cell wall	Glycosyltransferase	no hit	-	-	-	PF05693.9	Bacteria	Bacteroidetes	Bacteroidia	Bacteroidales	Bacteroidaceae	Bacteroides	Bacteroides graminisolvens	0	0	0	0	0	0	0	0	6.58e-05	0	7.36e-05	8.46e-05	0	0	0	0
A0A069D5F5	NA	COG0761	metabolism	I : Lipid	Penicillin tolerance protein	no hit	-	-	-	PF02401.14	Bacteria	Bacteroidetes	Bacteroidia	Bacteroidales	Bacteroidaceae	Bacteroides	Bacteroides graminisolvens	0	0.000209181	0.000242782	0	0	0	0	0	0	0.000185829	0	0	0	0	0	0
A0A069D5F7	GH43_10	COG3507	metabolism	G : Carbohydrate	Beta-xylosidase	no hit	-	-	-	PF04616.10	Bacteria	Bacteroidetes	Bacteroidia	Bacteroidales	Bacteroidaceae	Bacteroides	Bacteroides graminisolvens	0.000271042	0.000239795	0.000251274	0.000193456	0.000443405	0.000340224	0.000363204	0.000482026	0.00077727	0.000719071	0.000870174	0.00072088	0.000523541	0.000250336	0.000408054	0.000373591
A0A069D5F8	NA	COG1914	metabolism	P : Inorganic ion	Mn2+ and Fe2+ transporters of the NRAMP family	no hit	-	-	-	PF01566.14	Bacteria	Bacteroidetes	Bacteroidia	Bacteroidales	Bacteroidaceae	Bacteroides	Bacteroides graminisolvens	0	0	0	0	0	0	0	0	0	0	0	0	8.35e-05	0	0	0
A0A069D5G3	NA	COG2721	metabolism	G : Carbohydrate	Altronate dehydratase	no hit	-	-	-	PF04295.9	Bacteria	Bacteroidetes	Bacteroidia	Bacteroidales	Bacteroidaceae	Bacteroides	Bacteroides graminisolvens	0.000645697	0.000774469	0.000707921	0.000644869	0.000285137	0.000227579	0	0.000233641	0.000475836	0.000534537	0.000468038	0.000598887	0.000328024	0.00044444	0.00048257	0.000351751
A0A069D5G4	NA	COG0305	information storage and processing	L : Replication	Replicative DNA helicase	TIGR00665	DNA metabolism	DNA replication, recombination, and repair	replicative DNA helicase	PF03796.11	Bacteria	Bacteroidetes	Bacteroidia	Bacteroidales	Bacteroidaceae	Bacteroides	Bacteroides graminisolvens	0.000146222	0.000190255	0.000192948	0.00023369	0	0.000103245	0	0.00014606	0.000316858	0.000249234	0.00021139	0.000174978	0.0001315	0.000172014	0.00017564	0.000198531
A0A069D5G9	NA	COG2197	cellular processes and signaling	T : Signal transduction	Response regulator containing a CheY-like receiver domain and an HTH DNA-binding domain	no hit	-	-	-	PF00196.15	Bacteria	Bacteroidetes	Bacteroidia	Bacteroidales	Bacteroidaceae	Bacteroides	Bacteroides graminisolvens	0	0	0.000484108	0.000394868	0.000572277	0.000439026	0.000522855	0.000284236	0	0.000252632	0	0	0.000273755	0	0	0
A0A069D5H5	NA	COG0560	metabolism	E : Amino acid	Phosphoserine phosphatase	TIGR00338	Amino acid biosynthesis	Serine family	phosphoserine phosphatase SerB	PF13740.2	Bacteria	Bacteroidetes	Bacteroidia	Bacteroidales	Bacteroidaceae	Bacteroides	Bacteroides graminisolvens	0	0	0	0	0	0	0	0	8.8e-05	0	0	0	0	0	0	0
A0A069D5H6	NA	COG0685	metabolism	E : Amino acid	5,10-methylenetetrahydrofolate reductase	TIGR00676	Amino acid biosynthesis	Aspartate family	methylenetetrahydrofolate reductase [NAD(P)H]	PF02219.13	Bacteria	Bacteroidetes	Bacteroidia	Bacteroidales	Bacteroidaceae	Bacteroides	Bacteroides graminisolvens	0	0	0	0	0	0	0	0	0	0.000126027	0.000129554	0	0.00013516	0	0	0
A0A069D5I3	NA	no hit	-	S : Function unknown	-	no hit	-	-	-	PF12870.3	Bacteria	Bacteroidetes	Bacteroidia	Bacteroidales	Bacteroidaceae	Bacteroides	Bacteroides graminisolvens	0	0	0	0	0	0.000925355	0.000888661	0.00130185	0.000268009	0.000585885	0.00114017	0.00152758	0.000411646	0.00132862	0.00137995	0.00120451
A0A069D5I8	NA	COG3590	cellular processes and signaling	O : Posttranslational modification	Predicted metalloendopeptidase	no hit	-	-	-	PF05649.9	Bacteria	Bacteroidetes	Bacteroidia	Bacteroidales	Bacteroidaceae	Bacteroides	Bacteroides graminisolvens	0.000321195	0.000435741	0.000515195	0.000408528	0.000494152	0.000210516	0.000671677	0.000540724	0.000851716	0.0010077	0.000858103	0.000902492	0.000639814	0.000616716	0.000552204	0.000542573
A0A069D5I9	NA	COG0449	cellular processes and signaling	M : Cell wall	Glucosamine 6-phosphate synthetase, contains amidotransferase and phosphosugar isomerase domains	TIGR01135	Cell envelope	Biosynthesis and degradation of murein sacculus and peptidoglycan	glutamine-fructose-6-phosphate transaminase (isomerizing)	PF01380.18	Bacteria	Bacteroidetes	Bacteroidia	Bacteroidales	Bacteroidaceae	Bacteroides	Bacteroides graminisolvens	0	0	0	0	0.000109132	0	0.000121233	0	8.17e-05	6.44e-05	0.000112069	0.000183536	0	0	0	0
A0A069D5J2	NA	COG2911	poorly characterized	S : Function unknown	Uncharacterized protein conserved in bacteria	no hit	-	-	-	PF04357.9	Bacteria	Bacteroidetes	Bacteroidia	Bacteroidales	Bacteroidaceae	Bacteroides	Bacteroides graminisolvens	0	5.89e-05	6.34e-05	0	0	0	0	0	0	0	0	0	0	0	0	0
A0A069D5K3	NA	COG2025	metabolism	C : Energy production and conversion	Electron transfer flavoprotein, alpha subunit	no hit	-	-	-	PF01012.17	Bacteria	Bacteroidetes	Bacteroidia	Bacteroidales	Bacteroidaceae	Bacteroides	Bacteroides graminisolvens	0.000265572	0.000706431	0.000341819	0.000299029	0.000830412	0.000472932	0.000868373	0.000570829	0.000532003	0.000588395	0.000691296	0.000699828	0.000565343	0.00044935	0.000374363	0.000342976
A0A069D5K6	NA	no hit	-	S : Function unknown	-	no hit	-	-	-	PF10771.5	Bacteria	Bacteroidetes	Bacteroidia	Bacteroidales	Bacteroidaceae	Bacteroides	Bacteroides graminisolvens	0	0	0	0	0.00114817	0.000990948	0	0.000762579	0	0.00130367	0.00197637	0.00175046	0	0.00120055	0	0
A0A069D5K8	NA	COG1052	metabolism	C : Energy production and conversion	Lactate dehydrogenase and related dehydrogenases	no hit	-	-	-	PF02826.15	Bacteria	Bacteroidetes	Bacteroidia	Bacteroidales	Bacteroidaceae	Bacteroides	Bacteroides graminisolvens	0	0	0.000165455	0.000177629	0	0	0	0	0	0.000246618	0	0	0	0.000118141	0	0
A0A069D5K9	NA	COG0576	cellular processes and signaling	O : Posttranslational modification	Molecular chaperone GrpE (heat shock protein)	no hit	-	-	-	PF01025.15	Bacteria	Bacteroidetes	Bacteroidia	Bacteroidales	Bacteroidaceae	Bacteroides	Bacteroides graminisolvens	0	0	0	0	0.000320608	0.000255987	0	0	0	0.000262064	0	0	0.00034787	0	0.000257854	0
A0A069D5L0	NA	COG0124	information storage and processing	J : Translation	Histidyl-tRNA synthetase	TIGR00442	Protein synthesis	tRNA aminoacylation	histidine--tRNA ligase	PF13393.2	Bacteria	Bacteroidetes	Bacteroidia	Bacteroidales	Bacteroidaceae	Bacteroides	Bacteroides graminisolvens	0.000469512	0.000394314	0.000358538	0.000432321	0.000462289	0.000384148	0.000270711	0.000406482	0.000268417	0.000206023	0.000247516	0.000377087	0.000316959	0.000269914	0.000165849	0.000208542
A0A069D5L4	NA	no hit	-	S : Function unknown	-	no hit	-	-	-	PF03571.11	Bacteria	Bacteroidetes	Bacteroidia	Bacteroidales	Bacteroidaceae	Bacteroides	Bacteroides graminisolvens	0.000111016	0.000103471	0.000143893	0.000175594	9.81e-05	0.000260973	0.000328608	0.000348704	0.000119601	0.000266565	0.000346239	0.000390588	0.00011809	0.000245306	0.000198868	0.000117734
A0A069D5L6	NA	COG2820	metabolism	F : Nucleotide	Uridine phosphorylase	no hit	-	-	-	PF01048.16	Bacteria	Bacteroidetes	Bacteroidia	Bacteroidales	Bacteroidaceae	Bacteroides	Bacteroides graminisolvens	0.000791995	0.000718868	0.000957559	0.000803671	0.000686079	0.000790941	0.000960403	0.00104827	0.000469229	0.000900309	0.00077618	0.00102731	0.000422678	0.000642988	0.000576705	0.00066968
A0A069D5L9	NA	COG0119	metabolism	E : Amino acid	Isopropylmalate/homocitrate/citramalate synthases	no hit	-	-	-	PF00682.15	Bacteria	Bacteroidetes	Bacteroidia	Bacteroidales	Bacteroidaceae	Bacteroides	Bacteroides graminisolvens	0.000167893	0.000165067	0.000263243	0.000227003	0	0.000105071	0.000184479	0	0.000113084	0.000246779	0.000218308	0.000154141	0.000246366	0.000229009	0.000421413	0.000345375
A0A069D5M0	NA	COG0147	metabolism	E : Amino acid	Anthranilate/para-aminobenzoate synthases component I	no hit	-	-	-	PF00425.14	Bacteria	Bacteroidetes	Bacteroidia	Bacteroidales	Bacteroidaceae	Bacteroides	Bacteroides graminisolvens	0	0	0	0	0	0.000171373	0.000134199	0.000125178	0.000245982	0.00018482	0.000148061	0.000146547	0.000141551	0.00015251	0.000221396	0.000104822
A0A069D5M1	NA	COG0552	cellular processes and signaling	U : Intracellular trafficking	Signal recognition particle GTPase	TIGR00064	Protein fate	Protein and peptide secretion and trafficking	signal recognition particle-docking protein FtsY	PF00448.18	Bacteria	Bacteroidetes	Bacteroidia	Bacteroidales	Bacteroidaceae	Bacteroides	Bacteroides graminisolvens	0.00024034	0	0.000204983	0.000166664	0.000303488	0	0	0.000180812	0.00011167	0	0	0	0.000107505	0	0	0
A0A069D5M2	NA	no hit	-	S : Function unknown	-	no hit	-	-	-	PF10962.4	Bacteria	Bacteroidetes	Bacteroidia	Bacteroidales	Bacteroidaceae	Bacteroides	Bacteroides graminisolvens	0	0.000251752	0.000178477	0.000256778	0.000239311	0.00044563	0.000265819	0	0.000312451	0.000318221	0.000198426	0.000169458	0.000249386	0.000182064	0.000147465	0.000167933
A0A069D5M4	NA	COG0627	poorly characterized	R : General function prediction only	Predicted esterase	no hit	-	-	-	PF00756.16	Bacteria	Bacteroidetes	Bacteroidia	Bacteroidales	Bacteroidaceae	Bacteroides	Bacteroides graminisolvens	0.000278062	0.000228783	0.000268198	0.000197799	0.000360183	0.000718553	0.000574011	0.000420201	0.000735713	0.000736981	0.000397534	0.000827355	0.000373702	0.000482711	0.000335159	0.000352756
A0A069D5M6	NA	COG0159	metabolism	E : Amino acid	Tryptophan synthase alpha chain	TIGR00262	Amino acid biosynthesis	Aromatic amino acid family	tryptophan synthase, alpha subunit	PF00290.16	Bacteria	Bacteroidetes	Bacteroidia	Bacteroidales	Bacteroidaceae	Bacteroides	Bacteroides graminisolvens	0	0	0	0	0	0	0	0	0	0.000144615	0.000518544	0.000305777	0.000313862	0.000244352	0.000239484	0
A0A069D5M8	NA	COG1269	metabolism	C : Energy production and conversion	Archaeal/vacuolar-type H+-ATPase subunit I	no hit	-	-	-	PF01496.15	Bacteria	Bacteroidetes	Bacteroidia	Bacteroidales	Bacteroidaceae	Bacteroides	Bacteroides graminisolvens	7.06e-05	0.000116518	8.26e-05	0	0	0	0	0	0.000135009	0.000106322	0.000114537	7.84e-05	0.000112845	8.38e-05	0	7.77e-05
A0A069D5M9	NA	COG0482	information storage and processing	J : Translation	Predicted tRNA(5-methylaminomethyl-2-thiouridylate) methyltransferase, contains the PP-loop ATPase domain	TIGR00420	Protein synthesis	tRNA and rRNA base modification	tRNA (5-methylaminomethyl-2-thiouridylate)-methyltransferase	PF03054.12	Bacteria	Bacteroidetes	Bacteroidia	Bacteroidales	Bacteroidaceae	Bacteroides	Bacteroides graminisolvens	0	0	0.000989442	0.000639067	0.000210053	0	0	0	0.000331666	0.000233015	0.000258716	0.000145849	0.000572675	0.00019686	0	0
A0A069D5N0	NA	COG3063	cellular processes and signaling	N : Cell motility	Tfp pilus assembly protein PilF	no hit	-	-	-	PF13414.2	Bacteria	Bacteroidetes	Bacteroidia	Bacteroidales	Bacteroidaceae	Bacteroides	Bacteroides graminisolvens	0	0	0.000222559	0	0	0.000237128	0.000415487	0	0	0.000226922	0.000179012	0	0	0.000179434	0.0001827	0
A0A069D5N3	NA	COG0589	cellular processes and signaling	T : Signal transduction	Universal stress protein UspA and related nucleotide-binding proteins	no hit	-	-	-	PF00582.22	Bacteria	Bacteroidetes	Bacteroidia	Bacteroidales	Bacteroidaceae	Bacteroides	Bacteroides graminisolvens	0.00107424	0.00133435	0.00114333	0.00153889	0.00279427	0.00235307	0.0023655	0.00142118	0.00105413	0.00162257	0.00161342	0.00179543	0.000893311	0.000976905	0.001277	0.00167187
A0A069D5N7	GH2	COG3250	metabolism	G : Carbohydrate	Beta-galactosidase/beta-glucuronidase	no hit	-	-	-	PF02837.14	Bacteria	Bacteroidetes	Bacteroidia	Bacteroidales	Bacteroidaceae	Bacteroides	Bacteroides graminisolvens	0.000281962	0.000306313	0.000349826	0.000263567	0.000200896	0.000216877	0.000161543	0.000148085	0.000201271	0.00037967	0.000221172	0.000399376	0.000250568	0.000151887	0.000188278	0.000205267
A0A069D5N8	NA	COG0188	information storage and processing	L : Replication	Type IIA topoisomerase (DNA gyrase/topo II, topoisomerase IV), A subunit	TIGR01063	DNA metabolism	DNA replication, recombination, and repair	DNA gyrase, A subunit	PF00521.16	Bacteria	Bacteroidetes	Bacteroidia	Bacteroidales	Bacteroidaceae	Bacteroides	Bacteroides graminisolvens	0.000432192	0.000282808	0.000352673	0.000321653	0.000217037	0.000295804	0.000186398	0.000294739	0.000473738	0.000362493	0.000381014	0.000401153	0.000397334	0.00022027	0.000216208	0.000206156
A0A069D5N9	NA	COG3579	metabolism	E : Amino acid	Aminopeptidase C	no hit	-	-	-	PF03051.11	Bacteria	Bacteroidetes	Bacteroidia	Bacteroidales	Bacteroidaceae	Bacteroides	Bacteroides graminisolvens	0.000245311	0.000268535	0.000228929	0.000279268	0	0	0	0.00022301	0.000465731	0.000857351	0.000932591	0.000735002	0.000243803	0.00068347	0.000545819	0.000673232
A0A069D5P1	NA	COG2721	metabolism	G : Carbohydrate	Altronate dehydratase	no hit	-	-	-	PF04295.9	Bacteria	Bacteroidetes	Bacteroidia	Bacteroidales	Bacteroidaceae	Bacteroides	Bacteroides graminisolvens	0.000884897	0.000922648	0.00108296	0.00124284	0.00154521	0.000499822	0.000689851	0	0.00125106	0.0007392	0.000934403	0.00104045	0.000753854	0.000586902	0.0011909	0.000916898
A0A069D5P4	GH67	COG3661	metabolism	G : Carbohydrate	Alpha-glucuronidase	no hit	-	-	-	PF07488.8	Bacteria	Bacteroidetes	Bacteroidia	Bacteroidales	Bacteroidaceae	Bacteroides	Bacteroides graminisolvens	0.000398358	0.00062107	0.000658225	0.000527956	0	0.000315377	0.000464199	0	0.000616108	0.00065567	0.000636796	0.00085401	0.000411737	0.000279206	0.000280772	0.000424107
A0A069D5P6	NA	COG0800	metabolism	G : Carbohydrate	2-keto-3-deoxy-6-phosphogluconate aldolase	no hit	-	-	-	PF01081.15	Bacteria	Bacteroidetes	Bacteroidia	Bacteroidales	Bacteroidaceae	Bacteroides	Bacteroides graminisolvens	0	0	0	0	0.000520951	0.000319948	0.000522571	0.000623086	0.000542266	0.000820476	0.00094157	0.000858829	0.000408908	0.000575724	0.000876536	0.000590653
A0A069D5P7	NA	COG1960	metabolism	I : Lipid	Acyl-CoA dehydrogenases	no hit	-	-	-	PF12186.4	Bacteria	Bacteroidetes	Bacteroidia	Bacteroidales	Bacteroidaceae	Bacteroides	Bacteroides graminisolvens	0.000417771	0.000544595	0.000468777	0.000486528	0.0001458	0.000440444	0.000492574	0.000424548	0.000389822	0.000580984	0.000592501	0.000611506	0.000391769	0.00039481	0.000425656	0.00034526
A0A069D5P9	NA	COG0716	metabolism	C : Energy production and conversion	Flavodoxins	TIGR01752	Energy metabolism	Electron transport	flavodoxin	PF00258.21	Bacteria	Bacteroidetes	Bacteroidia	Bacteroidales	Bacteroidaceae	Bacteroides	Bacteroides graminisolvens	0.000699379	0.000499464	0.00058453	0.00113325	0.0010839	0.00147727	0.000707448	0.000701402	0	0.000303457	0.000250399	0.000280759	0	0.000479907	0	0
A0A069D5Q0	GT51	COG5009	cellular processes and signaling	M : Cell wall	Membrane carboxypeptidase/penicillin-binding protein	no hit	-	-	-	PF00912.18	Bacteria	Bacteroidetes	Bacteroidia	Bacteroidales	Bacteroidaceae	Bacteroides	Bacteroides graminisolvens	0	0	0	7.16e-05	8.89e-05	0.000106599	0	0	7.02e-05	0	0	0	0	0	0	0
A0A069D5Q1	NA	COG0459	cellular processes and signaling	O : Posttranslational modification	Chaperonin GroEL (HSP60 family)	TIGR02348	Protein fate	Protein folding and stabilization	chaperonin GroL	PF00118.20	Bacteria	Bacteroidetes	Bacteroidia	Bacteroidales	Bacteroidaceae	Bacteroides	Bacteroides graminisolvens	0.000617342	0.000722183	0.000948049	0.000914281	0.000578005	0.000719723	0.000670731	0.000626232	0.000832025	0.00111317	0.00104439	0.0012821	0.000562721	0.000631965	0.00111522	0.000905868
A0A069D5Q6	NA	COG2207	information storage and processing	K : Transcription	AraC-type DNA-binding domain-containing proteins	no hit	-	-	-	PF12833.3	Bacteria	Bacteroidetes	Bacteroidia	Bacteroidales	Bacteroidaceae	Bacteroides	Bacteroides graminisolvens	0.00153969	0.00200544	0.00203205	0.00187607	0.00161043	0.0030108	0.00297614	0.00246537	0.000919051	0.00197819	0.00137394	0.00213588	0.00102434	0.001726	0.00124284	0.00179622
A0A069D5Q8	NA	COG0224	metabolism	C : Energy production and conversion	F0F1-type ATP synthase, gamma subunit	TIGR01146	Energy metabolism	ATP-proton motive force interconversion	ATP synthase F1, gamma subunit	PF00231.15	Bacteria	Bacteroidetes	Bacteroidia	Bacteroidales	Bacteroidaceae	Bacteroides	Bacteroides graminisolvens	0	0	0.000200392	0	0.000266961	0	0	0	0.000189339	0	0.00026547	0.000254024	0	0	0.000164503	0
A0A069D5Q9	NA	COG0066	metabolism	E : Amino acid	3-isopropylmalate dehydratase small subunit	TIGR00171	Amino acid biosynthesis	Pyruvate family	3-isopropylmalate dehydratase, small subunit	PF00694.15	Bacteria	Bacteroidetes	Bacteroidia	Bacteroidales	Bacteroidaceae	Bacteroides	Bacteroides graminisolvens	0.000258699	0.000616755	0.000546158	0.000821986	0.000903483	0.000974773	0.000728741	0.000613459	0.000974159	0.00115411	0.00114471	0.000938554	0.00087136	0.000981785	0.000545897	0.000436871
A0A069D5R0	NA	no hit	-	S : Function unknown	-	no hit	-	-	-	no hit	Bacteria	Bacteroidetes	Bacteroidia	Bacteroidales	Bacteroidaceae	Bacteroides	Bacteroides graminisolvens	0	0	0	0	0	0.000519429	0	0	0	0	0	0	0	0	0	0
A0A069D5R2	NA	COG2211	metabolism	G : Carbohydrate	Na+/melibiose symporter and related transporters	TIGR00792	Transport and binding proteins	Carbohydrates, organic alcohols, and acids	sugar (Glycoside-Pentoside-Hexuronide) transporter	PF13347.2	Bacteria	Bacteroidetes	Bacteroidia	Bacteroidales	Bacteroidaceae	Bacteroides	Bacteroides graminisolvens	0	0	0	0	0	0	0	0	0.000101536	0	0	0	0	0	0	0
A0A069D5R4	NA	COG1155	metabolism	C : Energy production and conversion	Archaeal/vacuolar-type H+-ATPase subunit A	no hit	-	-	-	PF00006.21	Bacteria	Bacteroidetes	Bacteroidia	Bacteroidales	Bacteroidaceae	Bacteroides	Bacteroides graminisolvens	0	0	0	0	0	0.000134764	0.000158199	0	0.000119729	0	0	0.000241808	0	0	0	0
A0A069D5R9	NA	COG0138	metabolism	F : Nucleotide	AICAR transformylase/IMP cyclohydrolase PurH (only IMP cyclohydrolase domain in Aful)	no hit	-	-	-	PF01808.14	Bacteria	Bacteroidetes	Bacteroidia	Bacteroidales	Bacteroidaceae	Bacteroides	Bacteroides graminisolvens	0.000687382	0.000382369	0.000412618	0.000418977	0.000203617	0.000658278	0.000345539	0.000516512	0.000512272	0.000515944	0.000529117	0.000548412	0.000446127	0.000352952	0.000417468	0.000401633
A0A069D5S0	NA	COG0706	cellular processes and signaling	U : Intracellular trafficking	Preprotein translocase subunit YidC	TIGR03592	Protein fate	Protein and peptide secretion and trafficking	membrane protein insertase, YidC/Oxa1 family	PF02096.16	Bacteria	Bacteroidetes	Bacteroidia	Bacteroidales	Bacteroidaceae	Bacteroides	Bacteroides graminisolvens	0.000130854	0	9.88e-05	0	0.000194328	0	0	0	8.82e-05	0.000124524	0.000130266	0.000179114	0.000177136	7.92e-05	8.16e-05	0
A0A069D5S4	NA	COG2068	poorly characterized	R : General function prediction only	Uncharacterized MobA-related protein	no hit	-	-	-	no hit	Bacteria	Bacteroidetes	Bacteroidia	Bacteroidales	Bacteroidaceae	Bacteroides	Bacteroides graminisolvens	0.000358651	0.000426876	0.000378586	0.000503728	0.00088009	0.000540767	0	0.000437121	0.000831388	0.00069799	0.000961759	0.000595339	0.00077406	0.000701687	0.000480715	0.000492083
A0A069D5T7	NA	no hit	-	S : Function unknown	-	no hit	-	-	-	PF01814.19	Bacteria	Bacteroidetes	Bacteroidia	Bacteroidales	Bacteroidaceae	Bacteroides	Bacteroides graminisolvens	0.000550968	0.000607448	0.00178688	0.00153192	0.000712662	0.000460901	0.0006728	0.000417049	0.000752344	0.000788647	0.000495001	0.00042417	0.000679948	0.000683245	0.00027351	0
A0A069D5U4	NA	COG0071	cellular processes and signaling	O : Posttranslational modification	Molecular chaperone (small heat shock protein)	no hit	-	-	-	PF00011.17	Bacteria	Bacteroidetes	Bacteroidia	Bacteroidales	Bacteroidaceae	Bacteroides	Bacteroides graminisolvens	0	0.000388559	0.000579901	0.000568329	0.000574087	0.000867012	0.00125395	0.000930863	0.00044651	0.0014968	0.00145474	0.00154539	0.000385918	0.000868007	0.00116984	0.0012365
A0A069D5U6	NA	no hit	-	S : Function unknown	-	no hit	-	-	-	PF07632.7	Bacteria	Bacteroidetes	Bacteroidia	Bacteroidales	Bacteroidaceae	Bacteroides	Bacteroides graminisolvens	0	0	0	0	0	0	0	0	0	7.82e-05	0	0	0	0	0	0
A0A069D5U9	NA	COG1774	poorly characterized	S : Function unknown	Uncharacterized homolog of PSP1	no hit	-	-	-	PF04468.8	Bacteria	Bacteroidetes	Bacteroidia	Bacteroidales	Bacteroidaceae	Bacteroides	Bacteroides graminisolvens	0.000198011	0.00017444	0.000149865	0.000166664	0	0	0	0	0.000172233	0	0.000313293	0.000191832	0.000210239	0.000165573	0	0
A0A069D5V1	NA	COG1297	poorly characterized	S : Function unknown	Predicted membrane protein	TIGR00733	Transport and binding proteins	Amino acids, peptides and amines	oligopeptide transporter, OPT family	PF03169.11	Bacteria	Bacteroidetes	Bacteroidia	Bacteroidales	Bacteroidaceae	Bacteroides	Bacteroides graminisolvens	0	0	0	0	0.00010931	0	0	0	0.000118046	6.45e-05	0	0	7.3e-05	0	0	0
A0A069D5V4	NA	COG4771	metabolism	P : Inorganic ion	Outer membrane receptor for ferrienterochelin and colicins	no hit	-	-	-	PF00593.20	Bacteria	Bacteroidetes	Bacteroidia	Bacteroidales	Bacteroidaceae	Bacteroides	Bacteroides graminisolvens	0.000264311	0.000184115	0.000272332	0.000166469	0.000135745	0	0	0.000140431	0	8.92e-05	0.000185916	0.000311647	0	6.58e-05	0	0.000115231
A0A069D5V8	NA	COG0138	metabolism	F : Nucleotide	AICAR transformylase/IMP cyclohydrolase PurH (only IMP cyclohydrolase domain in Aful)	no hit	-	-	-	PF02142.18	Bacteria	Bacteroidetes	Bacteroidia	Bacteroidales	Bacteroidaceae	Bacteroides	Bacteroides graminisolvens	0.000537976	0.000965629	0.00113576	0.000953768	0.000761444	0.00121594	0.00103966	0.000930051	0.00078116	0.000597584	0.00109386	0.000893009	0.000754619	0.000816246	0.000699403	0
A0A069D5V9	NA	COG2873	metabolism	E : Amino acid	O-acetylhomoserine sulfhydrylase	TIGR01326	Amino acid biosynthesis	Aspartate family	O-acetylhomoserine aminocarboxypropyltransferase/cysteine synthase	PF01053.16	Bacteria	Bacteroidetes	Bacteroidia	Bacteroidales	Bacteroidaceae	Bacteroides	Bacteroides graminisolvens	0.00267564	0.000744916	0.00953867	0.0105462	0.00193552	0.00223533	0.00215082	0.00192869	0.00551575	0.00376744	0.0041566	0.00342611	0.00642306	0.00382931	0.00398684	0.00423106
A0A069D5X4	NA	COG1212	cellular processes and signaling	M : Cell wall	CMP-2-keto-3-deoxyoctulosonic acid synthetase	TIGR00466	Cell envelope	Biosynthesis and degradation of surface polysaccharides and lipopolysaccharides	3-deoxy-D-manno-octulosonate cytidylyltransferase	PF02348.15	Bacteria	Bacteroidetes	Bacteroidia	Bacteroidales	Bacteroidaceae	Bacteroides	Bacteroides graminisolvens	0	0	0	0	0	0	0	0	0.000145892	0	0	0	0.000140469	0	0	0
A0A069D5Y2	NA	no hit	-	S : Function unknown	-	no hit	-	-	-	PF09561.6	Bacteria	Bacteroidetes	Bacteroidia	Bacteroidales	Bacteroidaceae	Bacteroides	Bacteroides graminisolvens	0	0.000116911	0	0	0	0	0	0	0	0.000102944	0	0	0	0.000112333	0	0
A0A069D5Y3	NA	COG2759	metabolism	F : Nucleotide	Formyltetrahydrofolate synthetase	no hit	-	-	-	PF01268.15	Bacteria	Bacteroidetes	Bacteroidia	Bacteroidales	Bacteroidaceae	Bacteroides	Bacteroides graminisolvens	0	0	0	0	0.000237538	9.66e-05	0	0	0	0	0	0	0	9.18e-05	0	0
A0A069D5Y4	NA	COG1629	metabolism	P : Inorganic ion	Outer membrane receptor proteins, mostly Fe transport	no hit	-	-	-	PF14905.2	Bacteria	Bacteroidetes	Bacteroidia	Bacteroidales	Bacteroidaceae	Bacteroides	Bacteroides graminisolvens	5.73e-05	0	0.000139489	9.91e-05	0.000243367	0.000215832	0.000135859	0.00014756	0.000135377	4.81e-05	5.12e-05	0.000116825	8.46e-05	4.86e-05	0	0
A0A069D5Y8	NA	COG4771	metabolism	P : Inorganic ion	Outer membrane receptor for ferrienterochelin and colicins	no hit	-	-	-	PF13715.2	Bacteria	Bacteroidetes	Bacteroidia	Bacteroidales	Bacteroidaceae	Bacteroides	Bacteroides graminisolvens	0	0	0	0	0.000403657	0	0	0	0	0	0	0	0	0	0	0
A0A069D5Z0	CBM50-CBM50-CBM50	COG1388	cellular processes and signaling	M : Cell wall	FOG: LysM repeat	no hit	-	-	-	PF01476.16	Bacteria	Bacteroidetes	Bacteroidia	Bacteroidales	Bacteroidaceae	Bacteroides	Bacteroides graminisolvens	0	0	0	0.00012449	0.000113379	9.05e-05	0.000125938	0	9.74e-05	9.19e-05	9.48e-05	0	5.93e-05	0	0	0
A0A069D5Z2	NA	COG2873	metabolism	E : Amino acid	O-acetylhomoserine sulfhydrylase	no hit	-	-	-	PF01053.16	Bacteria	Bacteroidetes	Bacteroidia	Bacteroidales	Bacteroidaceae	Bacteroides	Bacteroides graminisolvens	0.00281656	0.00160988	0.0109407	0.0136875	0.00545803	0.00383891	0.0046168	0.00290417	0.00585787	0.00483551	0.00290538	0.00515533	0.00485587	0.00423779	0.00310985	0.00496175
A0A069D5Z3	NA	COG4206	metabolism	H : Coenzyme	Outer membrane cobalamin receptor protein	no hit	-	-	-	PF07715.11	Bacteria	Bacteroidetes	Bacteroidia	Bacteroidales	Bacteroidaceae	Bacteroides	Bacteroides graminisolvens	0.000834251	0.000890319	0.00128919	0.00112108	0.000702702	0.00087905	0.00115694	0.00111422	0.000624346	0.000762102	0.000879212	0.00106364	0.000639235	0.000553097	0.000820766	0.000560904
A0A069D5Z5	NA	COG1932	metabolism	H : Coenzyme	Phosphoserine aminotransferase	TIGR01364	Amino acid biosynthesis	Serine family	phosphoserine transaminase	PF00266.15	Bacteria	Bacteroidetes	Bacteroidia	Bacteroidales	Bacteroidaceae	Bacteroides	Bacteroides graminisolvens	0.000467202	0.00102966	0.000652825	0.000534333	0.000931475	0.000150961	0.000695403	0.000433156	0.000905198	0.00132459	0.00146912	0.00141422	0.000702099	0.0011541	0.000937591	0.00127949
A0A069D5Z6	NA	COG0317	cellular processes and signaling	T : Signal transduction	Guanosine polyphosphate pyrophosphohydrolases/synthetases	TIGR00691	Cellular processes	Adaptations to atypical conditions	RelA/SpoT family protein	PF04607.13	Bacteria	Bacteroidetes	Bacteroidia	Bacteroidales	Bacteroidaceae	Bacteroides	Bacteroides graminisolvens	0.000102897	0.000132937	0.000134725	0.000113878	0.000133419	0.000169402	0	0.000127956	0.000138645	5.39e-05	9.62e-05	0.000168826	0.000141181	0	0	0
A0A069D5Z8	NA	COG1232	metabolism	H : Coenzyme	Protoporphyrinogen oxidase	TIGR00562	Biosynthesis of cofactors, prosthetic groups, and carriers	Heme, porphyrin, and cobalamin	protoporphyrinogen oxidase	PF01593.20	Bacteria	Bacteroidetes	Bacteroidia	Bacteroidales	Bacteroidaceae	Bacteroides	Bacteroides graminisolvens	0.000210408	0.000156658	0.000222104	0.000334274	0.000441868	0.000198285	0.000279134	0.000169654	0.000198317	0.000120702	0.000278523	0.0002507	0.00015551	0.000145751	0.000221998	0.000252344
A0A069D5Z9	NA	COG2869	metabolism	C : Energy production and conversion	Na+-transporting NADH:ubiquinone oxidoreductase, subunit NqrC	TIGR01938	Transport and binding proteins	Cations and iron carrying compounds	NADH:ubiquinone oxidoreductase, Na(+)-translocating, C subunit	PF04205.10	Bacteria	Bacteroidetes	Bacteroidia	Bacteroidales	Bacteroidaceae	Bacteroides	Bacteroides graminisolvens	0.00032862	0.000304184	0.000499415	0	0.00107362	0.000849166	0.000973373	0.000894228	0.000716653	0.00047592	0.000613902	0.000487859	0.000379934	0.000367252	0.000553866	0
A0A069D615	NA	no hit	-	S : Function unknown	-	no hit	-	-	-	PF13568.2	Bacteria	Bacteroidetes	Bacteroidia	Bacteroidales	Bacteroidaceae	Bacteroides	Bacteroides graminisolvens	0	0	0	0	0	0	0	0.000204872	0	0	0	0	0	0	0	0
A0A069D617	NA	COG0642	cellular processes and signaling	T : Signal transduction	Signal transduction histidine kinase	TIGR00229	Regulatory functions	Small molecule interactions	PAS domain S-box protein	PF00072.20	Bacteria	Bacteroidetes	Bacteroidia	Bacteroidales	Bacteroidaceae	Bacteroides	Bacteroides graminisolvens	5.59e-05	7.88e-05	8.71e-05	0.00012871	7.54e-05	0	8.3e-05	0	0	0	0	0	0	4.04e-05	5.62e-05	8.2e-05
A0A069D620	NA	COG0488	poorly characterized	R : General function prediction only	ATPase components of ABC transporters with duplicated ATPase domains	TIGR03719	-	-	ATP-binding cassette protein, ChvD family	PF00005.23	Bacteria	Bacteroidetes	Bacteroidia	Bacteroidales	Bacteroidaceae	Bacteroides	Bacteroides graminisolvens	0.000113933	0.000149916	0	0	0	9.51e-05	0	0	9.42e-05	6.61e-05	7.2e-05	8.44e-05	0.000101938	6.39e-05	0	0
A0A069D624	NA	COG1663	cellular processes and signaling	M : Cell wall	Tetraacyldisaccharide-1-P 4'-kinase	TIGR00682	Cell envelope	Biosynthesis and degradation of surface polysaccharides and lipopolysaccharides	tetraacyldisaccharide 4'-kinase	PF02606.10	Bacteria	Bacteroidetes	Bacteroidia	Bacteroidales	Bacteroidaceae	Bacteroides	Bacteroides graminisolvens	0	0.000248995	0.000242903	0	0	0	0	0	0	0.000109634	0	0	0	0.000105943	0	0
A0A069D633	NA	COG0055	metabolism	C : Energy production and conversion	F0F1-type ATP synthase, beta subunit	TIGR01039	Energy metabolism	ATP-proton motive force interconversion	ATP synthase F1, beta subunit	PF00006.21	Bacteria	Bacteroidetes	Bacteroidia	Bacteroidales	Bacteroidaceae	Bacteroides	Bacteroides graminisolvens	0	8.37e-05	9.93e-05	0.000218057	0.000164351	0	0.00013986	0.000193719	0.000158895	0.000380206	0.000355447	0.000279798	0.000131712	0.000224994	0.000433181	0.00049301
A0A069D640	NA	COG1106	poorly characterized	R : General function prediction only	Predicted ATPases	no hit	-	-	-	PF13304.2	Bacteria	Bacteroidetes	Bacteroidia	Bacteroidales	Bacteroidaceae	Bacteroides	Bacteroides graminisolvens	0	0	0	0	0	0	0	0	0	0.000164692	0	0	0	0	0.000170137	0
A0A069D668	NA	no hit	-	S : Function unknown	-	no hit	-	-	-	PF07980.7	Bacteria	Bacteroidetes	Bacteroidia	Bacteroidales	Bacteroidaceae	Bacteroides	Bacteroides graminisolvens	8.83e-05	7.75e-05	0.00011555	0.000110259	0	0.000110163	0	0.000129716	4.98e-05	0.000112976	0.000158635	0.000283664	4.82e-05	0.000114995	0	0.000110583
A0A069D672	NA	COG2885	cellular processes and signaling	M : Cell wall	Outer membrane protein and related peptidoglycan-associated (lipo)proteins	no hit	-	-	-	PF00691.16	Bacteria	Bacteroidetes	Bacteroidia	Bacteroidales	Bacteroidaceae	Bacteroides	Bacteroides graminisolvens	0.00363096	0.00265038	0.00329	0.00408202	0.00549044	0.0032804	0.00394599	0.00325986	0.00296013	0.00385665	0.00366272	0.00350739	0.00249854	0.00318686	0.00366496	0.00286373
A0A069D675	NA	COG0381	cellular processes and signaling	M : Cell wall	UDP-N-acetylglucosamine 2-epimerase	TIGR00236	Cell envelope	Biosynthesis and degradation of surface polysaccharides and lipopolysaccharides	UDP-N-acetylglucosamine 2-epimerase	PF02350.15	Bacteria	Bacteroidetes	Bacteroidia	Bacteroidales	Bacteroidaceae	Bacteroides	Bacteroides graminisolvens	0.000131141	0.000156087	0.000139331	0	0	0.000148147	0	0	0.000185556	0.000279332	0.000155254	0.000267652	0.000153504	0.000206701	0	0.000135884
A0A069D678	NA	COG0440	metabolism	E : Amino acid	Acetolactate synthase, small (regulatory) subunit	TIGR00119	Amino acid biosynthesis	Pyruvate family	acetolactate synthase, small subunit	PF10369.5	Bacteria	Bacteroidetes	Bacteroidia	Bacteroidales	Bacteroidaceae	Bacteroides	Bacteroides graminisolvens	0.000484474	0.000905503	0.000797029	0.00045727	0.000528656	0.00095905	0.000870103	0.00050701	0.000479799	0.000999995	0.00077374	0.000852994	0.000307973	0.000482974	0.000609699	0.000527463
A0A069D679	NA	COG1294	metabolism	C : Energy production and conversion	Cytochrome bd-type quinol oxidase, subunit 2	no hit	-	-	-	PF02322.11	Bacteria	Bacteroidetes	Bacteroidia	Bacteroidales	Bacteroidaceae	Bacteroides	Bacteroides graminisolvens	0	0	0	0	0	0.000139874	0	0	0	0	0	0	0.000211159	0	0	0
A0A069D684	NA	COG0845	cellular processes and signaling	M : Cell wall	Membrane-fusion protein	TIGR01730	Transport and binding proteins	Unknown substrate	efflux transporter, RND family, MFP subunit	PF16576.1	Bacteria	Bacteroidetes	Bacteroidia	Bacteroidales	Bacteroidaceae	Bacteroides	Bacteroides graminisolvens	0	0	0	0	0	0	0	0	0.000161552	0.000137621	0	0	0	0	0.000103745	0
A0A069D688	NA	COG0363	metabolism	G : Carbohydrate	6-phosphogluconolactonase/Glucosamine-6-phosphate isomerase/deaminase	TIGR01198	Energy metabolism	Pentose phosphate pathway	6-phosphogluconolactonase	PF01182.16	Bacteria	Bacteroidetes	Bacteroidia	Bacteroidales	Bacteroidaceae	Bacteroides	Bacteroides graminisolvens	0	0	0.000286339	0.000304652	0.00119283	0.00136006	0.00112669	0.00105116	0.000614602	0.00105517	0.00142557	0.00134505	0.0004782	0.00103793	0.0014654	0.00131451
A0A069D689	NA	COG0095	metabolism	H : Coenzyme	Lipoate-protein ligase A	TIGR00545	Protein fate	Protein modification and repair	lipoyltransferase and lipoate-protein ligase	PF10437.5	Bacteria	Bacteroidetes	Bacteroidia	Bacteroidales	Bacteroidaceae	Bacteroides	Bacteroides graminisolvens	0.000150639	0	0	0	0	0	0	0	0	0	0	0	0	0	0	0
A0A069D6A4	NA	COG2910	poorly characterized	R : General function prediction only	Putative NADH-flavin reductase	no hit	-	-	-	PF13460.2	Bacteria	Bacteroidetes	Bacteroidia	Bacteroidales	Bacteroidaceae	Bacteroides	Bacteroides graminisolvens	0	0	0.000394345	0.000474498	0.000920559	0.00123732	0.00132888	0.00159143	0.00048169	0.00127559	0.0019494	0.00176368	0.000622795	0.00192402	0.00175694	0.00219115
A0A069D6A6	NA	no hit	-	S : Function unknown	-	no hit	-	-	-	PF13568.2	Bacteria	Bacteroidetes	Bacteroidia	Bacteroidales	Bacteroidaceae	Bacteroides	Bacteroides graminisolvens	0	0.000184301	0.000220147	0	0.000295185	0.000550142	0	0.000429254	0	0.000225922	0.000192129	0.000353791	0	0	0	0
A0A069D6B0	NA	COG3104	metabolism	E : Amino acid	Dipeptide/tripeptide permease	TIGR00924	Transport and binding proteins	Amino acids, peptides and amines	amino acid/peptide transporter (Peptide:H+ symporter)	PF00854.17	Bacteria	Bacteroidetes	Bacteroidia	Bacteroidales	Bacteroidaceae	Bacteroides	Bacteroides graminisolvens	8.49e-05	0	0	0	0	0	0	0	8.87e-05	0	0	9.43e-05	9.26e-05	7.14e-05	0	0
A0A069D6B3	NA	COG1897	metabolism	E : Amino acid	Homoserine trans-succinylase	TIGR01001	Amino acid biosynthesis	Aspartate family	homoserine O-succinyltransferase	PF04204.12	Bacteria	Bacteroidetes	Bacteroidia	Bacteroidales	Bacteroidaceae	Bacteroides	Bacteroides graminisolvens	0	0	0	0	0	0	0	0	0	0.000185987	0	0.000209049	0.000114218	0	0	0
A0A069D6B5	NA	COG0635	metabolism	H : Coenzyme	Coproporphyrinogen III oxidase and related Fe-S oxidoreductases	TIGR00538	Biosynthesis of cofactors, prosthetic groups, and carriers	Heme, porphyrin, and cobalamin	oxygen-independent coproporphyrinogen III oxidase	PF04055.17	Bacteria	Bacteroidetes	Bacteroidia	Bacteroidales	Bacteroidaceae	Bacteroides	Bacteroides graminisolvens	0	0	0.000110304	0	0	0	0	0	0.00015075	0.000275459	0.000249365	0.000204583	9.85e-05	0.000163625	0.00023027	0.000141449
A0A069D6B7	NA	COG2509	poorly characterized	R : General function prediction only	Uncharacterized FAD-dependent dehydrogenases	no hit	-	-	-	PF00890.20	Bacteria	Bacteroidetes	Bacteroidia	Bacteroidales	Bacteroidaceae	Bacteroides	Bacteroides graminisolvens	0	7.88e-05	9.14e-05	0	0	0	0	0	0	0	7.97e-05	9.25e-05	0	0	0	0
A0A069D6B8	NA	no hit	-	S : Function unknown	-	no hit	-	-	-	no hit	Bacteria	Bacteroidetes	Bacteroidia	Bacteroidales	Bacteroidaceae	Bacteroides	Bacteroides graminisolvens	0	0	0	0	0	0	0	0	0	0.000750199	0	0	0	0	0	0
A0A069D6B9	NA	COG0462	metabolism	F : Nucleotide	Phosphoribosylpyrophosphate synthetase	TIGR01251	Purines, pyrimidines, nucleosides, and nucleotides	Purine ribonucleotide biosynthesis	ribose-phosphate diphosphokinase	PF13793.2	Bacteria	Bacteroidetes	Bacteroidia	Bacteroidales	Bacteroidaceae	Bacteroides	Bacteroides graminisolvens	0.000162987	0.000209507	0.000163847	0	0.000322393	0	0	0	0.000481673	0.000557134	0.000605299	0.00041849	0.000264467	0.000343427	0.000373512	0.000321666
A0A069D6C2	NA	COG3635	metabolism	G : Carbohydrate	Predicted phosphoglycerate mutase, AP superfamily	TIGR02535	-	-	proposed homoserine kinase	PF10143.5	Bacteria	Bacteroidetes	Bacteroidia	Bacteroidales	Bacteroidaceae	Bacteroides	Bacteroides graminisolvens	0	0	0	0	0.000163831	0	0	0	0.000109107	0	0.000273699	0	0.000125501	0	0	0
A0A069D6D4	GH29	COG3669	metabolism	G : Carbohydrate	Alpha-L-fucosidase	no hit	-	-	-	PF01120.13	Bacteria	Bacteroidetes	Bacteroidia	Bacteroidales	Bacteroidaceae	Bacteroides	Bacteroides graminisolvens	9.07e-05	0	0	0	0	0	0	0	0	0	0	0	0.000147464	0	0	0
A0A069D6D5	NA	COG0616	cellular processes and signaling	O : Posttranslational modification	Periplasmic serine proteases (ClpP class)	TIGR00705	Protein fate	Degradation of proteins, peptides, and glycopeptides	signal peptide peptidase SppA, 67K type	PF01343.14	Bacteria	Bacteroidetes	Bacteroidia	Bacteroidales	Bacteroidaceae	Bacteroides	Bacteroides graminisolvens	0.00064982	0.00083385	0.00108076	0.00113067	0.00061236	0.000528296	0.000583534	0.000882263	0.0008911	0.00141169	0.00143121	0.00174456	0.00073737	0.00108347	0.00115629	0.00142317
A0A069D6D6	NA	no hit	-	S : Function unknown	-	no hit	-	-	-	PF15418.2	Bacteria	Bacteroidetes	Bacteroidia	Bacteroidales	Bacteroidaceae	Bacteroides	Bacteroides graminisolvens	0	0	0	0	0	0.000107509	0	0	0	0	0	0	0	0	0	0
A0A069D6D9	NA	COG1048	metabolism	C : Energy production and conversion	Aconitase A	no hit	-	-	-	PF00330.16	Bacteria	Bacteroidetes	Bacteroidia	Bacteroidales	Bacteroidaceae	Bacteroides	Bacteroides graminisolvens	0.000686505	0.000688055	0.000750709	0.000977181	0.000904614	0.000671754	0.000755098	0.000650687	0.00053538	0.000763615	0.000934433	0.000738846	0.000516347	0.000647489	0.000653234	0.00068001
A0A069D6E1	GH2	COG3250	metabolism	G : Carbohydrate	Beta-galactosidase/beta-glucuronidase	no hit	-	-	-	PF02837.14	Bacteria	Bacteroidetes	Bacteroidia	Bacteroidales	Bacteroidaceae	Bacteroides	Bacteroides graminisolvens	0.000101501	9.38e-05	0.000133798	0.000129832	0.000110668	0	0	0	0	0	0	0	4.56e-05	0	0	0
A0A069D6E2	NA	COG0016	information storage and processing	J : Translation	Phenylalanyl-tRNA synthetase alpha subunit	TIGR00468	Protein synthesis	tRNA aminoacylation	phenylalanine--tRNA ligase, alpha subunit	PF01409.16	Bacteria	Bacteroidetes	Bacteroidia	Bacteroidales	Bacteroidaceae	Bacteroides	Bacteroides graminisolvens	0.000181543	0.000124498	0.000341819	0.000286091	0.00024386	0.000157821	0.000185266	0.000252278	0.000268751	0.000325558	0.000202954	0.00028318	0.000275412	0	0.000253325	0.000190267
A0A069D6E4	NA	COG0059	metabolism	E : Amino acid	Ketol-acid reductoisomerase	TIGR00465	Amino acid biosynthesis	Pyruvate family	ketol-acid reductoisomerase	PF07991.8	Bacteria	Bacteroidetes	Bacteroidia	Bacteroidales	Bacteroidaceae	Bacteroides	Bacteroides graminisolvens	0.00187805	0.00197946	0.00234821	0.00272566	0.000757666	0.00117823	0.00143129	0.00113048	0.00168893	0.00180832	0.00174328	0.00187154	0.00148756	0.00138443	0.00159651	0.00188075
A0A069D6E9	NA	COG1047	cellular processes and signaling	O : Posttranslational modification	FKBP-type peptidyl-prolyl cis-trans isomerases 2	no hit	-	-	-	PF00254.24	Bacteria	Bacteroidetes	Bacteroidia	Bacteroidales	Bacteroidaceae	Bacteroides	Bacteroides graminisolvens	0.0004803	0	0	0	0	0	0	0	0	0	0	0	0.000234404	0	0	0
A0A069D6F4	NA	COG0624	metabolism	E : Amino acid	Acetylornithine deacetylase/Succinyl-diaminopimelate desuccinylase and related deacylases	no hit	-	-	-	PF01546.24	Bacteria	Bacteroidetes	Bacteroidia	Bacteroidales	Bacteroidaceae	Bacteroides	Bacteroides graminisolvens	0.000109736	0	0.000110316	0.000119204	0.000147919	0.000118104	0.000207285	0	0.000217815	0.000261902	0.000310555	0.000241947	0.000173944	0.000118684	0.000110251	0.000108287
A0A069D6F5	NA	COG0448	metabolism	G : Carbohydrate	ADP-glucose pyrophosphorylase	no hit	-	-	-	PF16314.1	Bacteria	Bacteroidetes	Bacteroidia	Bacteroidales	Bacteroidaceae	Bacteroides	Bacteroides graminisolvens	9.3e-05	0	7.55e-05	0	0	8.07e-05	0	0.000115333	6.74e-05	0.000101749	8.71e-05	9.65e-05	0.000102896	8.12e-05	6.24e-05	9.74e-05
A0A069D6F8	NA	COG0778	metabolism	C : Energy production and conversion	Nitroreductase	no hit	-	-	-	PF00881.20	Bacteria	Bacteroidetes	Bacteroidia	Bacteroidales	Bacteroidaceae	Bacteroides	Bacteroides graminisolvens	0	0	0	0	0	0	0	0	0	0	0	0	0	0.000201769	0	0
A0A069D6F9	NA	COG0022	metabolism	C : Energy production and conversion	Pyruvate/2-oxoglutarate dehydrogenase complex, dehydrogenase (E1) component, eukaryotic type, beta subunit	no hit	-	-	-	PF02779.20	Bacteria	Bacteroidetes	Bacteroidia	Bacteroidales	Bacteroidaceae	Bacteroides	Bacteroides graminisolvens	0.000198793	0.000296466	0.000498047	0.000468259	0.000449476	0.000374605	0.000274744	0.000281136	0.000167578	0.00027668	0.000416147	0.000433002	0.000104627	0.000286523	0.000371984	0.00042972
A0A069D6G0	NA	COG0528	metabolism	F : Nucleotide	Uridylate kinase	TIGR02075	Purines, pyrimidines, nucleosides, and nucleotides	Nucleotide and nucleoside interconversions	UMP kinase	PF00696.24	Bacteria	Bacteroidetes	Bacteroidia	Bacteroidales	Bacteroidaceae	Bacteroides	Bacteroides graminisolvens	0.000193232	0.000255977	0.000208431	0.000220405	0	0.000218088	0	0	0.000262438	0.000532158	0.000695509	0.000708087	0.000139015	0.000376819	0.000350519	0.00029755
A0A069D6G3	NA	COG0511	metabolism	I : Lipid	Biotin carboxyl carrier protein	no hit	-	-	-	PF00364.18	Bacteria	Bacteroidetes	Bacteroidia	Bacteroidales	Bacteroidaceae	Bacteroides	Bacteroides graminisolvens	0.000331062	0.000395235	0.000349465	0.000377617	0.000812394	0.000561546	0	0.000409673	0.000637108	0.000379841	0.000484535	0.000331806	0.000388616	0.000458657	0.000376863	0
A0A069D6G5	NA	COG1884	metabolism	I : Lipid	Methylmalonyl-CoA mutase, N-terminal domain/subunit	no hit	-	-	-	PF01642.18	Bacteria	Bacteroidetes	Bacteroidia	Bacteroidales	Bacteroidaceae	Bacteroides	Bacteroides graminisolvens	0.000751506	0.000582526	0.000764881	0.000694178	0.000534125	0.000778563	0.00072533	0.000516152	0.00070923	0.000595466	0.000650529	0.000620379	0.000613854	0.000480893	0.00044935	0.000599349
A0A069D6G8	NA	COG2374	poorly characterized	R : General function prediction only	Predicted extracellular nuclease	no hit	-	-	-	PF03372.19	Bacteria	Bacteroidetes	Bacteroidia	Bacteroidales	Bacteroidaceae	Bacteroides	Bacteroides graminisolvens	0	0	0	0	0	0	0.000269465	0	0	0.00023527	0	0	0	0.000118636	0.000189265	0.000209682
A0A069D6H0	NA	COG1048	metabolism	C : Energy production and conversion	Aconitase A	no hit	-	-	-	PF00330.16	Bacteria	Bacteroidetes	Bacteroidia	Bacteroidales	Bacteroidaceae	Bacteroides	Bacteroides graminisolvens	0.00057023	0.000977751	0.000998543	0.000646351	0.000610343	0.000909457	0.00123101	0.00127756	0.00068827	0.00144267	0.00155234	0.00172594	0.000564716	0.00080596	0.000948622	0.00110623
A0A069D6H3	NA	COG0802	poorly characterized	R : General function prediction only	Predicted ATPase or kinase	TIGR00150	Protein synthesis	tRNA and rRNA base modification	tRNA threonylcarbamoyl adenosine modification protein YjeE	PF02367.13	Bacteria	Bacteroidetes	Bacteroidia	Bacteroidales	Bacteroidaceae	Bacteroides	Bacteroides graminisolvens	0	0	0	0	0	0.000382151	0	0	0	0	0	0	0	0	0	0
A0A069D6H5	NA	COG3884	metabolism	I : Lipid	Acyl-ACP thioesterase	no hit	-	-	-	PF01643.13	Bacteria	Bacteroidetes	Bacteroidia	Bacteroidales	Bacteroidaceae	Bacteroides	Bacteroides graminisolvens	0	0	0	0	0	0	0	0	0	0.000306371	0.000162477	0	0.000136782	0	0	0.000199718
A0A069D6H8	NA	no hit	-	S : Function unknown	-	no hit	-	-	-	no hit	Bacteria	Bacteroidetes	Bacteroidia	Bacteroidales	Bacteroidaceae	Bacteroides	Bacteroides graminisolvens	0	0	0	0	0	0	0	0	0	0.000108071	0.000111094	0.000120533	8.36e-05	0.000100668	0	0
A0A069D6I3	NA	COG0516	metabolism	F : Nucleotide	IMP dehydrogenase/GMP reductase	TIGR01302	Purines, pyrimidines, nucleosides, and nucleotides	Purine ribonucleotide biosynthesis	inosine-5'-monophosphate dehydrogenase	PF00478.21	Bacteria	Bacteroidetes	Bacteroidia	Bacteroidales	Bacteroidaceae	Bacteroides	Bacteroides graminisolvens	0.00054921	0.000815799	0.000736527	0.000784147	0.000653154	0.000703803	0.000730159	0.00049065	0.000779926	0.000846007	0.00110813	0.00102064	0.000703262	0.000623187	0.000919489	0.000534287
A0A069D6I8	NA	COG0544	cellular processes and signaling	O : Posttranslational modification	FKBP-type peptidyl-prolyl cis-trans isomerase (trigger factor)	no hit	-	-	-	PF05697.9	Bacteria	Bacteroidetes	Bacteroidia	Bacteroidales	Bacteroidaceae	Bacteroides	Bacteroides graminisolvens	0.00060478	0.000566506	0	0	0.000899426	0.000537534	0.000495397	0.000387249	0.000760828	0.00034419	0.000292707	0.000313454	0.000529877	0.000604118	0	0
A0A069D6I9	NA	COG1071	metabolism	C : Energy production and conversion	Pyruvate/2-oxoglutarate dehydrogenase complex, dehydrogenase (E1) component, eukaryotic type, alpha subunit	no hit	-	-	-	PF00676.16	Bacteria	Bacteroidetes	Bacteroidia	Bacteroidales	Bacteroidaceae	Bacteroides	Bacteroides graminisolvens	0.000227935	0	0.000164199	0.000173631	0	0.00022918	0.000201945	0	0	0.000176115	0.000222793	0	0	0	0.000132766	0.000151194
A0A069D6J2	NA	COG0317	cellular processes and signaling	T : Signal transduction	Guanosine polyphosphate pyrophosphohydrolases/synthetases	TIGR00691	Cellular processes	Adaptations to atypical conditions	RelA/SpoT family protein	PF13328.2	Bacteria	Bacteroidetes	Bacteroidia	Bacteroidales	Bacteroidaceae	Bacteroides	Bacteroides graminisolvens	6.65e-05	7.54e-05	0	0.000166286	0	0	0	7.35e-05	0	9.95e-05	9.49e-05	8.32e-05	0	0	7.22e-05	6.3e-05
A0A069D6J3	NA	COG1884	metabolism	I : Lipid	Methylmalonyl-CoA mutase, N-terminal domain/subunit	no hit	-	-	-	PF01642.18	Bacteria	Bacteroidetes	Bacteroidia	Bacteroidales	Bacteroidaceae	Bacteroides	Bacteroides graminisolvens	0.00138482	0.00133547	0.0014647	0.000815855	0.00136749	0.000727408	0.00134461	0.000536029	0.000859198	0.00114419	0.00141737	0.00115667	0.00108476	0.00122716	0.00112355	0.000797365
A0A069D6J7	NA	COG1192	cellular processes and signaling	D : Cell cycle control	ATPases involved in chromosome partitioning	no hit	-	-	-	PF01656.19	Bacteria	Bacteroidetes	Bacteroidia	Bacteroidales	Bacteroidaceae	Bacteroides	Bacteroides graminisolvens	0	0.000163422	0	0	0	0	0	0	0.000141333	0.00016295	0	0.00018244	0.000133042	0	0	0
A0A069D6K4	NA	COG1399	poorly characterized	R : General function prediction only	Predicted metal-binding, possibly nucleic acid-binding protein	no hit	-	-	-	PF02620.13	Bacteria	Bacteroidetes	Bacteroidia	Bacteroidales	Bacteroidaceae	Bacteroides	Bacteroides graminisolvens	0	0.000292843	0	0	0	0	0.000325415	0	0.000187467	0.000204908	0.000312536	0.000241994	0.000167203	0.000186087	0	0
A0A069D6K9	NA	COG0841	cellular processes and signaling	V : Defense mechanisms	Cation/multidrug efflux pump	no hit	-	-	-	PF00873.15	Bacteria	Bacteroidetes	Bacteroidia	Bacteroidales	Bacteroidaceae	Bacteroides	Bacteroides graminisolvens	0	0	0	0	9.35e-05	0	0	0	0	0	0	0	0	0	0	0
A0A069D6L0	NA	COG0126	metabolism	G : Carbohydrate	3-phosphoglycerate kinase	no hit	-	-	-	PF00162.15	Bacteria	Bacteroidetes	Bacteroidia	Bacteroidales	Bacteroidaceae	Bacteroides	Bacteroides graminisolvens	0.00225976	0.00175058	0.00222531	0.00229227	0.00189303	0.00200033	0.0023775	0.0015846	0.00224529	0.00214798	0.00205153	0.00222505	0.00183963	0.00151195	0.00230033	0.00262112
A0A069D6L3	NA	COG0203	information storage and processing	J : Translation	Ribosomal protein L17	TIGR00059	Protein synthesis	Ribosomal proteins: synthesis and modification	ribosomal protein bL17	PF01196.15	Bacteria	Bacteroidetes	Bacteroidia	Bacteroidales	Bacteroidaceae	Bacteroides	Bacteroides graminisolvens	0.00148221	0.00173023	0.00182925	0.00126444	0.000918254	0.000546763	0.00069098	0.000593592	0.000703174	0.00113048	0.000522222	0.000706195	0.000274465	0.00143211	0.000558167	0.000805284
A0A069D6M1	NA	COG2373	poorly characterized	R : General function prediction only	Large extracellular alpha-helical protein	no hit	-	-	-	no hit	Bacteria	Bacteroidetes	Bacteroidia	Bacteroidales	Bacteroidaceae	Bacteroides	Bacteroides graminisolvens	0.000106871	0.000127587	0.000112807	0.000243789	0	0	0	0	0	0.000167792	0.000180996	0	7.69e-05	0	0	0
A0A069D6M2	NA	COG1778	poorly characterized	R : General function prediction only	Low specificity phosphatase (HAD superfamily)	TIGR01670	Cell envelope	Biosynthesis and degradation of surface polysaccharides and lipopolysaccharides	3-deoxy-D-manno-octulosonate 8-phosphate phosphatase, YrbI family	PF08282.8	Bacteria	Bacteroidetes	Bacteroidia	Bacteroidales	Bacteroidaceae	Bacteroides	Bacteroides graminisolvens	0	0	0	0	0	0	0	0	0	0	0.000233853	0	0	0	0	0.000291394
A0A069D6M3	NA	COG3593	information storage and processing	L : Replication	Predicted ATP-dependent endonuclease of the OLD family	no hit	-	-	-	PF13304.2	Bacteria	Bacteroidetes	Bacteroidia	Bacteroidales	Bacteroidaceae	Bacteroides	Bacteroides graminisolvens	0.000170986	0.000289115	0.000516967	0.000293284	0.000285064	0.000277279	0	0	0.000307365	0.000221809	0.000291845	0.000434597	0.000160703	0.000227207	0	0.000324285
A0A069D6M6	NA	COG4799	metabolism	I : Lipid	Acetyl-CoA carboxylase, carboxyltransferase component (subunits alpha and beta)	no hit	-	-	-	PF01039.18	Bacteria	Bacteroidetes	Bacteroidia	Bacteroidales	Bacteroidaceae	Bacteroides	Bacteroides graminisolvens	0.000943336	0.000868758	0.000844614	0.000898501	0.000898817	0.000896708	0.000962627	0.000777821	0.000794175	0.000836389	0.00102719	0.00107022	0.000741699	0.000717314	0.000950388	0.0010727
A0A069D6M7	GH5_7	COG3934	metabolism	G : Carbohydrate	Endo-beta-mannanase	no hit	-	-	-	no hit	Bacteria	Bacteroidetes	Bacteroidia	Bacteroidales	Bacteroidaceae	Bacteroides	Bacteroides graminisolvens	0	0.00029537	0.000273371	0.000167205	0.000228675	0.000414599	0.000362999	0.000319027	0.000174427	0.00042148	0.000622405	0.000429895	0.000108363	0.000451806	0.000435039	0.00076052
A0A069D6M9	GH13	COG0366	metabolism	G : Carbohydrate	Glycosidases	no hit	-	-	-	PF00128.20	Bacteria	Bacteroidetes	Bacteroidia	Bacteroidales	Bacteroidaceae	Bacteroides	Bacteroides graminisolvens	0.00103779	0.000823088	0.000914695	0.000881413	0.000511385	0.000376264	0.000329365	0.000463251	0.000398492	0.00046353	0.000588363	0.000565859	0.000515199	0.000373442	0.000457568	0.000336271
A0A069D6N1	NA	no hit	-	S : Function unknown	-	no hit	-	-	-	no hit	Bacteria	Bacteroidetes	Bacteroidia	Bacteroidales	Bacteroidaceae	Bacteroides	Bacteroides graminisolvens	0	0	0	0	0	0.000463852	0.000338585	0.000371347	0	0	0	0	0	0	0	0
A0A069D6N6	GH26	COG4124	metabolism	G : Carbohydrate	Beta-mannanase	no hit	-	-	-	PF02156.11	Bacteria	Bacteroidetes	Bacteroidia	Bacteroidales	Bacteroidaceae	Bacteroides	Bacteroides graminisolvens	0	0	0.000201506	0.000289911	0.00027019	0.000215731	0.000283668	0.000221394	0.000202253	0.000168206	0	0	0	0	0	0.000283029
A0A069D6N7	NA	COG0457	poorly characterized	R : General function prediction only	FOG: TPR repeat	no hit	-	-	-	PF13414.2	Bacteria	Bacteroidetes	Bacteroidia	Bacteroidales	Bacteroidaceae	Bacteroides	Bacteroides graminisolvens	0	0	0	0	0	0	0	0	4.95e-05	0	0	0	0	0	0	0
A0A069D6N8	NA	COG0180	information storage and processing	J : Translation	Tryptophanyl-tRNA synthetase	TIGR00233	Protein synthesis	tRNA aminoacylation	tryptophan--tRNA ligase	PF00579.21	Bacteria	Bacteroidetes	Bacteroidia	Bacteroidales	Bacteroidaceae	Bacteroides	Bacteroides graminisolvens	0.000144335	0.000171792	0.000148037	0.000164632	0	0	0	0	0.000152922	0.000121221	0.000183901	0	0	0	0	0.000213998
A0A069D6P2	NA	COG0256	information storage and processing	J : Translation	Ribosomal protein L18	TIGR00060	Protein synthesis	Ribosomal proteins: synthesis and modification	ribosomal protein uL18	PF00861.18	Bacteria	Bacteroidetes	Bacteroidia	Bacteroidales	Bacteroidaceae	Bacteroides	Bacteroides graminisolvens	0.00124657	0.00135531	0.000722318	0.00100372	0.00115644	0.00187724	0.000987981	0.00104581	0.0013195	0.0011551	0.00122977	0.00164971	0.00138375	0.000785361	0.00116708	0.00113956
A0A069D6P3	NA	no hit	-	S : Function unknown	-	no hit	-	-	-	no hit	Bacteria	Bacteroidetes	Bacteroidia	Bacteroidales	Bacteroidaceae	Bacteroides	Bacteroides graminisolvens	0	0	0	0	0	0	0	0.00022229	0	0	0	0	0	0	0	0
A0A069D6P6	NA	COG3630	metabolism	C : Energy production and conversion	Na+-transporting methylmalonyl-CoA/oxaloacetate decarboxylase, gamma subunit	no hit	-	-	-	PF04277.9	Bacteria	Bacteroidetes	Bacteroidia	Bacteroidales	Bacteroidaceae	Bacteroides	Bacteroides graminisolvens	0.000331154	0.000267966	0.000423743	0.000266449	0.00063124	0.00045311	0.000513775	0.000433321	0.000324385	0.000329752	0.000490193	0.000503672	0.000290466	0.000360236	0.000404527	0.000412413
A0A069D6Q0	NA	COG0191	metabolism	G : Carbohydrate	Fructose/tagatose bisphosphate aldolase	TIGR01859	Energy metabolism	Glycolysis/gluconeogenesis	fructose-1,6-bisphosphate aldolase, class II	PF01116.16	Bacteria	Bacteroidetes	Bacteroidia	Bacteroidales	Bacteroidaceae	Bacteroides	Bacteroides graminisolvens	0.000148407	0	0.000261773	0.000375959	0.000728351	0.000838806	0.000989087	0.00095854	0.000489744	0.0012806	0.00129165	0.00109269	0.000348415	0.000870298	0.00121032	0.00112627
A0A069D6Q1	NA	COG0198	information storage and processing	J : Translation	Ribosomal protein L24	TIGR01079	Protein synthesis	Ribosomal proteins: synthesis and modification	ribosomal protein uL24	PF00467.25	Bacteria	Bacteroidetes	Bacteroidia	Bacteroidales	Bacteroidaceae	Bacteroides	Bacteroides graminisolvens	0.00293301	0.00308629	0.00313205	0.00357226	0.0017238	0.00118765	0.00173875	0.00130239	0.00249655	0.00315379	0.0018582	0.00222998	0.00211703	0.00281551	0.000951421	0.000934362
A0A069D6Q7	NA	COG0569	metabolism	P : Inorganic ion	K+ transport systems, NAD-binding component	no hit	-	-	-	PF02254.14	Bacteria	Bacteroidetes	Bacteroidia	Bacteroidales	Bacteroidaceae	Bacteroides	Bacteroides graminisolvens	0	0	0	0	0	0	0	0	0.000129073	0.000127206	9.49e-05	0	0.00014471	0.000120264	0	0.000105429
A0A069D6Q8	NA	COG1538	cellular processes and signaling	M : Cell wall	Outer membrane protein	no hit	-	-	-	PF02321.14	Bacteria	Bacteroidetes	Bacteroidia	Bacteroidales	Bacteroidaceae	Bacteroides	Bacteroides graminisolvens	0	0	0	0	0.000361224	0.00014445	0	0	0	0.000106594	0.000117556	0.00016753	0	0.000109306	0	0
A0A069D6R0	NA	COG0323	information storage and processing	L : Replication	DNA mismatch repair enzyme (predicted ATPase)	TIGR00585	DNA metabolism	DNA replication, recombination, and repair	DNA mismatch repair protein MutL	PF01119.15	Bacteria	Bacteroidetes	Bacteroidia	Bacteroidales	Bacteroidaceae	Bacteroides	Bacteroides graminisolvens	0	0	0	0	0	0.000115623	0	0	9.01e-05	6.76e-05	0	0	0	0	0	0
A0A069D6R1	NA	COG0088	information storage and processing	J : Translation	Ribosomal protein L4	TIGR03953	Protein synthesis	Ribosomal proteins: synthesis and modification	50S ribosomal protein uL4	PF00573.18	Bacteria	Bacteroidetes	Bacteroidia	Bacteroidales	Bacteroidaceae	Bacteroides	Bacteroides graminisolvens	0.00118432	0.00121744	0.00128099	0.00113209	0.00126763	0.00111432	0.00138816	0.000656232	0.00118015	0.00119284	0.00101256	0.00106159	0.00109561	0.000890604	0.000920181	0.000869083
A0A069D6R2	NA	COG1826	cellular processes and signaling	U : Intracellular trafficking	Sec-independent protein secretion pathway components	no hit	-	-	-	PF02416.12	Bacteria	Bacteroidetes	Bacteroidia	Bacteroidales	Bacteroidaceae	Bacteroides	Bacteroides graminisolvens	0	0	0	0	0	0	0	0.000751067	0	0	0	0	0	0	0	0
A0A069D6R3	NA	COG1159	poorly characterized	R : General function prediction only	GTPase	TIGR00436	Protein synthesis	Other	GTP-binding protein Era	PF07650.13	Bacteria	Bacteroidetes	Bacteroidia	Bacteroidales	Bacteroidaceae	Bacteroides	Bacteroides graminisolvens	0.000161576	0.000144044	0.000170558	0	0.000228693	0.000182361	0	0	0.000123486	0	0	0	0.000110137	0	0	0
A0A069D6R5	NA	COG0760	cellular processes and signaling	O : Posttranslational modification	Parvulin-like peptidyl-prolyl isomerase	no hit	-	-	-	PF00639.17	Bacteria	Bacteroidetes	Bacteroidia	Bacteroidales	Bacteroidaceae	Bacteroides	Bacteroides graminisolvens	0	0	0	0	0	0	0	0	0	0	0	0	0	0	8e-05	0
A0A069D6R7	GH105	COG4225	poorly characterized	R : General function prediction only	Predicted unsaturated glucuronyl hydrolase involved in regulation of bacterial surface properties, and related proteins	no hit	-	-	-	PF07470.9	Bacteria	Bacteroidetes	Bacteroidia	Bacteroidales	Bacteroidaceae	Bacteroides	Bacteroides graminisolvens	0.000294465	0.000874343	0.00079354	0.00106422	0	0.000511973	0.000300502	0.000654307	0.000435916	0.000875436	0.000809903	0.00074318	0.000702936	0.000916207	0.00114982	0.000845475
A0A069D6R8	NA	no hit	-	S : Function unknown	-	no hit	-	-	-	no hit	Bacteria	Bacteroidetes	Bacteroidia	Bacteroidales	Bacteroidaceae	Bacteroides	Bacteroides graminisolvens	0	0	0	0	0	0	0	0	0	0	0	0	0	0.00027435	0	0
A0A069D6S1	NA	COG1629	metabolism	P : Inorganic ion	Outer membrane receptor proteins, mostly Fe transport	TIGR04056	Transport and binding proteins	Unknown substrate	TonB-linked outer membrane protein, SusC/RagA family	PF07715.11	Bacteria	Bacteroidetes	Bacteroidia	Bacteroidales	Bacteroidaceae	Bacteroides	Bacteroides graminisolvens	0.00085358	0.000670225	0.000617325	0.000365905	0.000582835	0.000738292	0.00037799	0.000448578	0.00064602	0.00065421	0.000544384	0.000806361	0.000438115	0.000705435	0.000471723	0.000577386
A0A069D6S2	NA	COG0544	cellular processes and signaling	O : Posttranslational modification	FKBP-type peptidyl-prolyl cis-trans isomerase (trigger factor)	no hit	-	-	-	no hit	Bacteria	Bacteroidetes	Bacteroidia	Bacteroidales	Bacteroidaceae	Bacteroides	Bacteroides graminisolvens	0.00118355	0.000875258	0.000766517	0.000877042	0.000828506	0.000371785	0.000728414	0.000403148	0.00102235	0.000749722	0.000760465	0.000790805	0.000761827	0.000710981	0.000474671	0.000465621
A0A069D6S4	NA	COG0848	cellular processes and signaling	U : Intracellular trafficking	Biopolymer transport protein	no hit	-	-	-	PF02472.12	Bacteria	Bacteroidetes	Bacteroidia	Bacteroidales	Bacteroidaceae	Bacteroides	Bacteroides graminisolvens	0.00295706	0.00384965	0.00379989	0.0036025	0.00268789	0.00289661	0.0032512	0.00222014	0.00285887	0.00315454	0.00264987	0.00313111	0.0024762	0.00247113	0.00221996	0.0019989
A0A069D6S5	NA	COG1309	information storage and processing	K : Transcription	Transcriptional regulator	no hit	-	-	-	PF00440.19	Bacteria	Bacteroidetes	Bacteroidia	Bacteroidales	Bacteroidaceae	Bacteroides	Bacteroides graminisolvens	0.000406344	0.000806594	0.000693662	0.000466938	0.000319081	0	0	0	0	0	0	0.000225944	0.000166996	0	0	0
A0A069D6T0	NA	COG0761	metabolism	I : Lipid	Penicillin tolerance protein	no hit	-	-	-	PF02401.14	Bacteria	Bacteroidetes	Bacteroidia	Bacteroidales	Bacteroidaceae	Bacteroides	Bacteroides graminisolvens	0	0	0	0	0	0.000535012	0	0	0	0	0	0	0	0	0	0
A0A069D6T1	NA	COG0100	information storage and processing	J : Translation	Ribosomal protein S11	TIGR03632	Protein synthesis	Ribosomal proteins: synthesis and modification	ribosomal protein uS11	PF00411.15	Bacteria	Bacteroidetes	Bacteroidia	Bacteroidales	Bacteroidaceae	Bacteroides	Bacteroides graminisolvens	0.00143188	0.00175252	0.00116217	0.00158902	0	0.00124421	0.000929995	0.00103379	0.000965468	0.00113528	0.00131217	0.00110345	0.000861583	0.00120716	0.0010965	0.000654783
A0A069D6T2	NA	COG1249	metabolism	C : Energy production and conversion	Pyruvate/2-oxoglutarate dehydrogenase complex, dihydrolipoamide dehydrogenase (E3) component, and related enzymes	TIGR01350	-	-	dihydrolipoyl dehydrogenase	PF07992.10	Bacteria	Bacteroidetes	Bacteroidia	Bacteroidales	Bacteroidaceae	Bacteroides	Bacteroides graminisolvens	0.000105922	9.42e-05	0.000147434	0	0	0	0.000140503	0.00016926	0	8.31e-05	9.47e-05	0	0	0	0	0.000214921
A0A069D6T3	NA	COG1137	poorly characterized	R : General function prediction only	ABC-type (unclassified) transport system, ATPase component	TIGR04406	Cell envelope	Biosynthesis and degradation of surface polysaccharides and lipopolysaccharides	LPS export ABC transporter ATP-binding protein	PF00005.23	Bacteria	Bacteroidetes	Bacteroidia	Bacteroidales	Bacteroidaceae	Bacteroides	Bacteroides graminisolvens	0.00050318	0.000717288	0.000512333	0	0.000262773	0.000209809	0.000289467	0.000320959	0.000317292	0	0	0.000250507	0	0	0	0.000197691
A0A069D6T5	NA	COG2227	metabolism	H : Coenzyme	2-polyprenyl-3-methyl-5-hydroxy-6-metoxy-1,4-benzoquinol methylase	no hit	-	-	-	PF13489.2	Bacteria	Bacteroidetes	Bacteroidia	Bacteroidales	Bacteroidaceae	Bacteroides	Bacteroides graminisolvens	0	0.000141153	0.000167135	0.000180599	0	0	0	0	0.000158943	0.00018972	0.00014153	0.000155605	0	0.000129951	0.000205845	0.00016406
A0A069D6T7	NA	COG0332	metabolism	I : Lipid	3-oxoacyl-[acyl-carrier-protein] synthase III	TIGR00747	Fatty acid and phospholipid metabolism	Biosynthesis	3-oxoacyl-[acyl-carrier-protein] synthase III	PF08541.6	Bacteria	Bacteroidetes	Bacteroidia	Bacteroidales	Bacteroidaceae	Bacteroides	Bacteroides graminisolvens	0.00038379	0.000335045	0.00024654	0.000161674	0.00020062	0.000373483	0.000188039	0.000245044	0.000789779	0.000556883	0.000746132	0.00057341	0.000686953	0.00018802	0.000421949	0.000394358
A0A069D6T9	NA	COG0809	information storage and processing	J : Translation	S-adenosylmethionine:tRNA-ribosyltransferase-isomerase (queuine synthetase)	TIGR00113	Protein synthesis	tRNA and rRNA base modification	S-adenosylmethionine:tRNA ribosyltransferase-isomerase	PF02547.11	Bacteria	Bacteroidetes	Bacteroidia	Bacteroidales	Bacteroidaceae	Bacteroides	Bacteroides graminisolvens	0.000216033	0.00023887	0.000189215	0.000189436	0.000521878	0.000863401	0.000778457	0.000703683	0.000317969	0.000614071	0.000447743	0.000540721	0.000612182	0.000511871	0.000545292	0.000410239
A0A069D6U5	NA	COG0200	information storage and processing	J : Translation	Ribosomal protein L15	TIGR01071	Protein synthesis	Ribosomal proteins: synthesis and modification	ribosomal protein uL15	PF00828.15	Bacteria	Bacteroidetes	Bacteroidia	Bacteroidales	Bacteroidaceae	Bacteroides	Bacteroides graminisolvens	0.00329802	0.00333178	0.002341	0.0030567	0.00268704	0.00265177	0.00209654	0.00181141	0.00281203	0.00256062	0.00237361	0.0031726	0.00244662	0.00224322	0.00190447	0.00185684
A0A069D6U6	NA	no hit	-	S : Function unknown	-	no hit	-	-	-	no hit	Bacteria	Bacteroidetes	Bacteroidia	Bacteroidales	Bacteroidaceae	Bacteroides	Bacteroides graminisolvens	0	0.000502284	0	0.000461832	0	0	0	0.000261455	0.000252165	0.000258653	0.000298787	0	0.000153668	0.000242752	0	0
A0A069D6U8	NA	COG1028	metabolism	I : Lipid	Dehydrogenases with different specificities (related to short-chain alcohol dehydrogenases)	no hit	-	-	-	PF00106.21	Bacteria	Bacteroidetes	Bacteroidia	Bacteroidales	Bacteroidaceae	Bacteroides	Bacteroides graminisolvens	0.00020764	0.000245406	0.00037359	0.000583263	0.000725164	0.000938153	0.000399471	0.00116982	0.00094537	0.00116269	0.0013573	0.00146379	0.000959486	0.000970663	0.00131673	0.00136064
A0A069D6U9	NA	COG0199	information storage and processing	J : Translation	Ribosomal protein S14	no hit	-	-	-	PF00253.17	Bacteria	Bacteroidetes	Bacteroidia	Bacteroidales	Bacteroidaceae	Bacteroides	Bacteroides graminisolvens	0.000851997	0.00062868	0.000746233	0.000826732	0.000928862	0	0.000790444	0.000669788	0.000772383	0.000717642	0.000748684	0	0.000765363	0.000771681	0	0
A0A069D6V1	NA	COG0255	information storage and processing	J : Translation	Ribosomal protein L29	TIGR00012	Protein synthesis	Ribosomal proteins: synthesis and modification	ribosomal protein uL29	PF00831.19	Bacteria	Bacteroidetes	Bacteroidia	Bacteroidales	Bacteroidaceae	Bacteroides	Bacteroides graminisolvens	0	0	0	0	0.00129169	0.00195129	0.00249794	0	0	0.00144627	0.00114079	0.0017144	0	0.00117064	0	0
A0A069D6V5	NA	COG0090	information storage and processing	J : Translation	Ribosomal protein L2	TIGR01171	Protein synthesis	Ribosomal proteins: synthesis and modification	ribosomal protein uL2	PF03947.14	Bacteria	Bacteroidetes	Bacteroidia	Bacteroidales	Bacteroidaceae	Bacteroides	Bacteroides graminisolvens	0.000224914	0.000258513	0.000304765	0.000374057	0.000244552	0.00019526	0.00025675	0.000210584	0.000291695	0.000233103	0	0	0.000209062	0.000296001	0	0
A0A069D6V6	NA	COG0099	information storage and processing	J : Translation	Ribosomal protein S13	TIGR03631	Protein synthesis	Ribosomal proteins: synthesis and modification	ribosomal protein uS13	PF00416.18	Bacteria	Bacteroidetes	Bacteroidia	Bacteroidales	Bacteroidaceae	Bacteroides	Bacteroides graminisolvens	0.000864829	0.00111576	0.000793229	0.000666122	0.000531803	0.00127637	0.000558329	0.000435759	0.000545572	0.000627733	0.000671705	0.000622742	0.000711355	0.000616751	0	0.000373185
A0A069D6V7	NA	COG0480	information storage and processing	J : Translation	Translation elongation factors (GTPases)	TIGR00484	Protein synthesis	Translation factors	translation elongation factor G	PF00009.23	Bacteria	Bacteroidetes	Bacteroidia	Bacteroidales	Bacteroidaceae	Bacteroides	Bacteroides graminisolvens	0.000705201	0.000618149	0.000872285	0.00101606	0.000377089	0.000480992	0.000517344	0.000567486	0.000566686	0.000576997	0.000718003	0.00086759	0.000577295	0.000538412	0.000687882	0.00078536
[truncated: 9,294 more rows]

## Sheet: 16S rDNA gene sequencing
#rdp_tax_and_bootstrap	blast_taxonomy	blast_subject	blast_perc_identity	blast_perc_query_coverage	blast_evalue	blast_aln_length	seed_id	seed_sequence	observation_name	observation_sum	RWS1.T1	RWS1.T2	RWS1.T3	RWS1.T4	RWS2.T1	RWS2.T2	RWS2.T3	RWS2.T4	TWS1.T1	TWS1.T2	TWS1.T3	TWS1.T4	TWS2.T1	TWS2.T2	TWS2.T3	TWS2.T4
[truncated: 223 more rows]
