# Supplementary material for: Horizontal metaproteomics and CAZymes analysis of lignocellulolytic microbial consortia selectively enriched from cow rumen and termite gut
Source: Springer Nature journal article supplement (doi:10.1038/s43705-023-00339-0), 2023-12-01
Supplement: MOESM3 [file 43705_2023_339_moesm3_esm.xlsx]

## Sheet: GH
CAZy family	Known activity (CAZy database)	Multimodular protein	Number of proteins in the dataset
Cellulases
GH5	Endoglucanase	Yes (3/11)	11
GH9	Endoglucanase	Yes (6/9)	9
GH48	Reducing end-acting cellobiohydrolase / endo-β-1,4-glucanase	Yes (4/5)	5
Cellulose oligosaccharides degrading enzymes
GH1	β-glucosidase / 6-phospho-β-glucosidase / β-galactosidase	No (15)	15
GH3	β-glucosidase	No (38)	38
Cellobiose phosphorylase
GH94	Cellobiose phosphorylase	No (22)	22
Endohemicellulases
GH8	Endo-β-1,4-xylanase	Yes (2/2)	2
GH10	Endo-β-1,4-xylanase	Yes (7/11)	11
GH11	Endo-β-1,4-xylanase	Yes (7/9)	9
GH26	β-mannanase	No (4)	4
Hemicelluloses debranching enzymes
GH51	α-L-arabinofuranosidase	Yes (1/19)	19
GH67	α-glucuronidase / Xylan α-1,2-glucuronidase	No (3)	3
GH115	Xylan α-1,2-glucuronidase	No (2)	2
GH127	β-L-arabinofuranosidase	No (1)	1
GH137	β-L-arabinofuranosidase	Yes (1/1)	1
GH146	β-L-arabinofuranosidase	No (4)	4
Hemicelluloses oligosaccharides degrading enzymes
GH2	β-galactosidase / β-glucuronidase	Yes (2/17)	17
GH27	α-galactosidase	No (1)	1
GH29	α-L-fucosidase	No (1)	1
GH30	O-Glycosyl hydrolase	Yes (4/5)	5
GH35	β-galactosidase	No (1)	1
GH36	α-galactosidase	No (1)	1
GH38	α-mannosidase	No (1)	1
GH42	β-galactosidase	No (1)	1
GH43	β-xylosidase/α-L-arabinofuranosidase	Yes (11/39)	39
GH92	Mannosyl-oligosaccharide α-1,2-mannosidase	No (6)	6
GH95	α-L-fucosidase	No (2)	2
GH120	β-xylosidase	No (2)	2
GH125	Exo-α-1,6-mannosidase	No (1)	1
Hemicelluloses phosphorylases
GH130	β-1,4-mannosylglucose phosphorylase	No (2)	2
Starch degrading enzymes
GH4	α-galactosidases / 6-phospho-β-glucosidases	No (7)	7
GH13	α-amylase	Yes (10/22)	22
GH31	α-glucosidase	No (14)	14
GH57	α-amylase / α-mannosidase	No (4)	4
GH77	Amylomaltase / 4-α-glucanotransferase	Yes (1/3)	3
GH97	Glucoamylase / α-glucosidase / α-galactosidase	No (9)	9
GH133	amylo-α-1,6-glucosidase	No (4)	4
Starch phosphorylases
GH65	Maltose phosphorylase	No (1)	1
Pectin depolymerase
GH28	Polygalacturonase	No (3)	3
Pectin oligosaccharides degrading enzymes
GH105	Unsaturated rhamnogalacturonyl hydrolase	Yes (1/7)	7

## Sheet: CE
Enzyme class	Nb of Families	Nb of proteins	Main families	Known activity (CAZy database)	Nb of proteins	Multimodular protein
CE	8	31	CE1	Acetyl xylan esterase	18	Yes (5/18)
			CE6	Acetyl xylan esterase	6	Yes (4/6)
			CE8	Pectin methylesterase	3	No (3)
			CE7	Acetyl xylan esterase	2	No (2)
			CE11	UDP-3-0-acyl N-acetylglucosamine deacetylase	2	No (2)
			CE15	4-O-methyl-glucuronoyl methylesterase	2	No (2)
			CE3	Acetyl xylan esterase	1	Yes (1/1)
			CE4	Acetyl xylan esterase	1	Yes (1/1)
					35

## Sheet: GT
Enzyme class	Nb of Families	Nb of proteins	Main families	Known activity (CAZy database)	Nb of proteins	Multimodular protein
GT	10	43	GT35	Glycogen or starch phosphorylase	19	No (19)
			GT5	Glycogen or starch glucosyltransferase	10	Yes (1/10)
			GT2	Cellulose or chitin synthase	4	No (4)
			GT4	Sucrose synthase / α-glucosyltransferase	4	No (4)
			GT19	Lipid-A-disaccharide synthase	1	No (1)
			GT20	α,α-trehalose-phosphate synthase	1	No (1)
			GT28	1,2-diacylglycerol 3-β-galactosyltransferase	1	No (1)
			GT3	Glycogen synthase	1	No (1)
			GT30	α-3-deoxy-D-manno-octulosonic-acid transferase	1	No (1)
			GT51	Murein polymerase	1	No (1)
					43

## Sheet: PL
Enzyme class	Nb of Families	Nb of proteins	Main families	Known activity (CAZy database)	Nb of proteins	Multimodular protein
PL	4	4	PL1	Pectate or pectin lyase	1	No (1)
			PL9	Pectate lyase	1	No (1)
			PL10	Pectate lyase	1	No (1)
			PL11	Rhamnogalacturonan endolyase/exolyase	1	No (1)

## Sheet: CBM
Enzyme class	Nb of Families	Nb of proteins	Main families	Nb of proteins
CBM	18	62	CBM6	12
			CBM4	9
			CBM2	7
			CBM50	7
			CBM13	5
			CBM22	5
			CBM48	4
			CBM25	3
			CBM36	3
			CBM37	2
			CBM26	2
			CBM3	1
			CBM5	1
			CBM11	1
			CBM20	1
			CBM30	1
			CBM57	1
			CBM61	1
				66
